# Supplementary material for: Catalyst- and reagent-free 1,6-hydrophosphonylation of p-quinone methides: a practical approach for the synthesis of diarylmethyl phosphine oxides
Source: Royal Society of Chemistry journal article supplement (doi:10.1039/c9ob01326a), 2019-01-01

## *Supporting Information*

### **Catalyst- and reagent- free 1,6-hydrophosphonylation of *p*-quinone methides: a practical approach for the synthesis of diarylmethyl phosphine oxides**

Yogesh N. Aher<sup>a</sup> and Amit B. Pawar<sup>\*a,b</sup>

<sup>a</sup>*Department of Organic Synthesis and Process Chemistry, CSIR-Indian Institute of Chemical Technology, Hyderabad 500007, India.*

<sup>b</sup>*Academy of Scientific and Innovative Research (AcSIR), Ghaziabad 201002, India.*

*Email: amitorgchem@gmail.com, amit@iict.res.in*

|                                                                                               |     |
|-----------------------------------------------------------------------------------------------|-----|
| <b>Table of Content</b>                                                                       | S-1 |
| <b>2. Experimental Procedure of the Optimization Study</b>                                    | S-2 |
| <b>3. Mechanistic Experiments</b>                                                             | S-3 |
| <b>8. Appendix</b>                                                                            | S-4 |
| Spectral Copies of <sup>1</sup> H and <sup>13</sup> C NMR of Compounds Obtained in this Study |     |

## 2. Experimental Procedure of the Optimization Study

To a screw capped vial with a spinvane triangular-shaped Teflon stirbar were added *p*-quinone methide **1a** (29.4 mg, 0.10 mmol), diphenylphosphine oxide **2a** (30.3 mg, 0.15 mmol), and solvent (0.6 mL). The reaction mixture was stirred at 80 °C for indicated time. (in case of H<sub>2</sub>O as a solvent, after the heating the reaction mixture for indicated time, it was extracted with ethyl acetate (2 × 5 mL) and the extracts were dried over NaSO<sub>4</sub>). Afterwards, the reaction mixture was concentrated under reduced pressure and crude yield was measured by <sup>1</sup>H NMR using an internal standard (1,1,2,2-tetrachloroethane).

**Table S1. Optimization of the Catalyst- and Reagent- free 1,6-Hydrophosphonylation of *p*-Quinone Methides<sup>a</sup>**

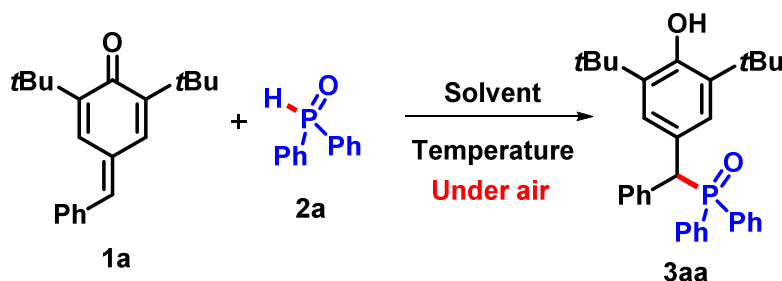

| entry                 | solvent               | temp ( °C) | yield (%) <sup>b</sup>     |
|-----------------------|-----------------------|------------|----------------------------|
| 1                     | 1,2-DCE               | 80         | 86 <sup>c</sup>            |
| 2                     | 1,2-DCE               | 80         | 80                         |
| 3                     | THF                   | 80         | 82                         |
| 4                     | CH <sub>3</sub> CN    | 80         | 87                         |
| 5                     | Toluene               | 80         | 85                         |
| 6                     | 1,4-Dioxane           | 80         | 96 (92)                    |
| 7                     | MeOH                  | 80         | 81                         |
| 8                     | EtOAc                 | 80         | 85                         |
| 9                     | H <sub>2</sub> O      | 80         | 68                         |
| <b>10<sup>d</sup></b> | <b>H<sub>2</sub>O</b> | <b>80</b>  | <b>98 (94)<sup>e</sup></b> |
| 11 <sup>d</sup>       | H <sub>2</sub> O      | 40         | 70                         |

<sup>a</sup>Reaction conditions: **1a** (0.10 mmol), **2a** (0.15 mmol) in solvent (0.6 mL) at indicated temperature for 8 h.

<sup>b</sup>Isolated yields are based on crude <sup>1</sup>H NMR (internal standard: 1,1,2,2 tetrachloroethane). <sup>c</sup>Under 1 atm of O<sub>2</sub> (ballon). <sup>d</sup>Reaction run for 12 h. <sup>e</sup>Yield in the parentheses indicates isolated yield.

### 3. Mechanistic Experiments

#### Radical Trap Experiments

To a screw capped vial with a spinvane triangular-shaped Teflon stirbar were added *p*-quinone methide **1a** (29.4 mg, 0.10 mmol), diphenylphosphine oxide **2a** (30.3 mg, 0.15 mmol). Then Radical Scavengers such as BHT (44.0 mg, 0.2 mmol) or and 1,1-diphenylethylene (36.1 mg, 0.2 mmol), and H<sub>2</sub>O (0.6 mL) were added. The reaction mixture was stirred at 80 °C for 12 h. After indicated time, the reaction mixture was cooled to room temperature & extracted with ethyl acetate (2 × 10 mL) and the extract was dried over NaSO<sub>4</sub>. Then the solvent was removed under reduced pressure and crude yield was measured by <sup>1</sup>H NMR using an internal standard (1,1,2,2-tetrachloroethane).

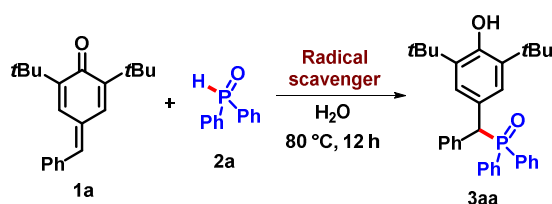

| Radical scavenger (equiv.)    | <sup>1</sup> H NMR yield of <b>3aa</b> |
|-------------------------------|----------------------------------------|
| 1. BHT (2.0)                  | 98%                                    |
| 2. 1,1-Diphenylethylene (2.0) | 97%                                    |

# *Appendix*

**Spectral Copies of  $^1\text{H}$  and  $^{13}\text{C}$  NMR of Compounds  
Obtained in this study**

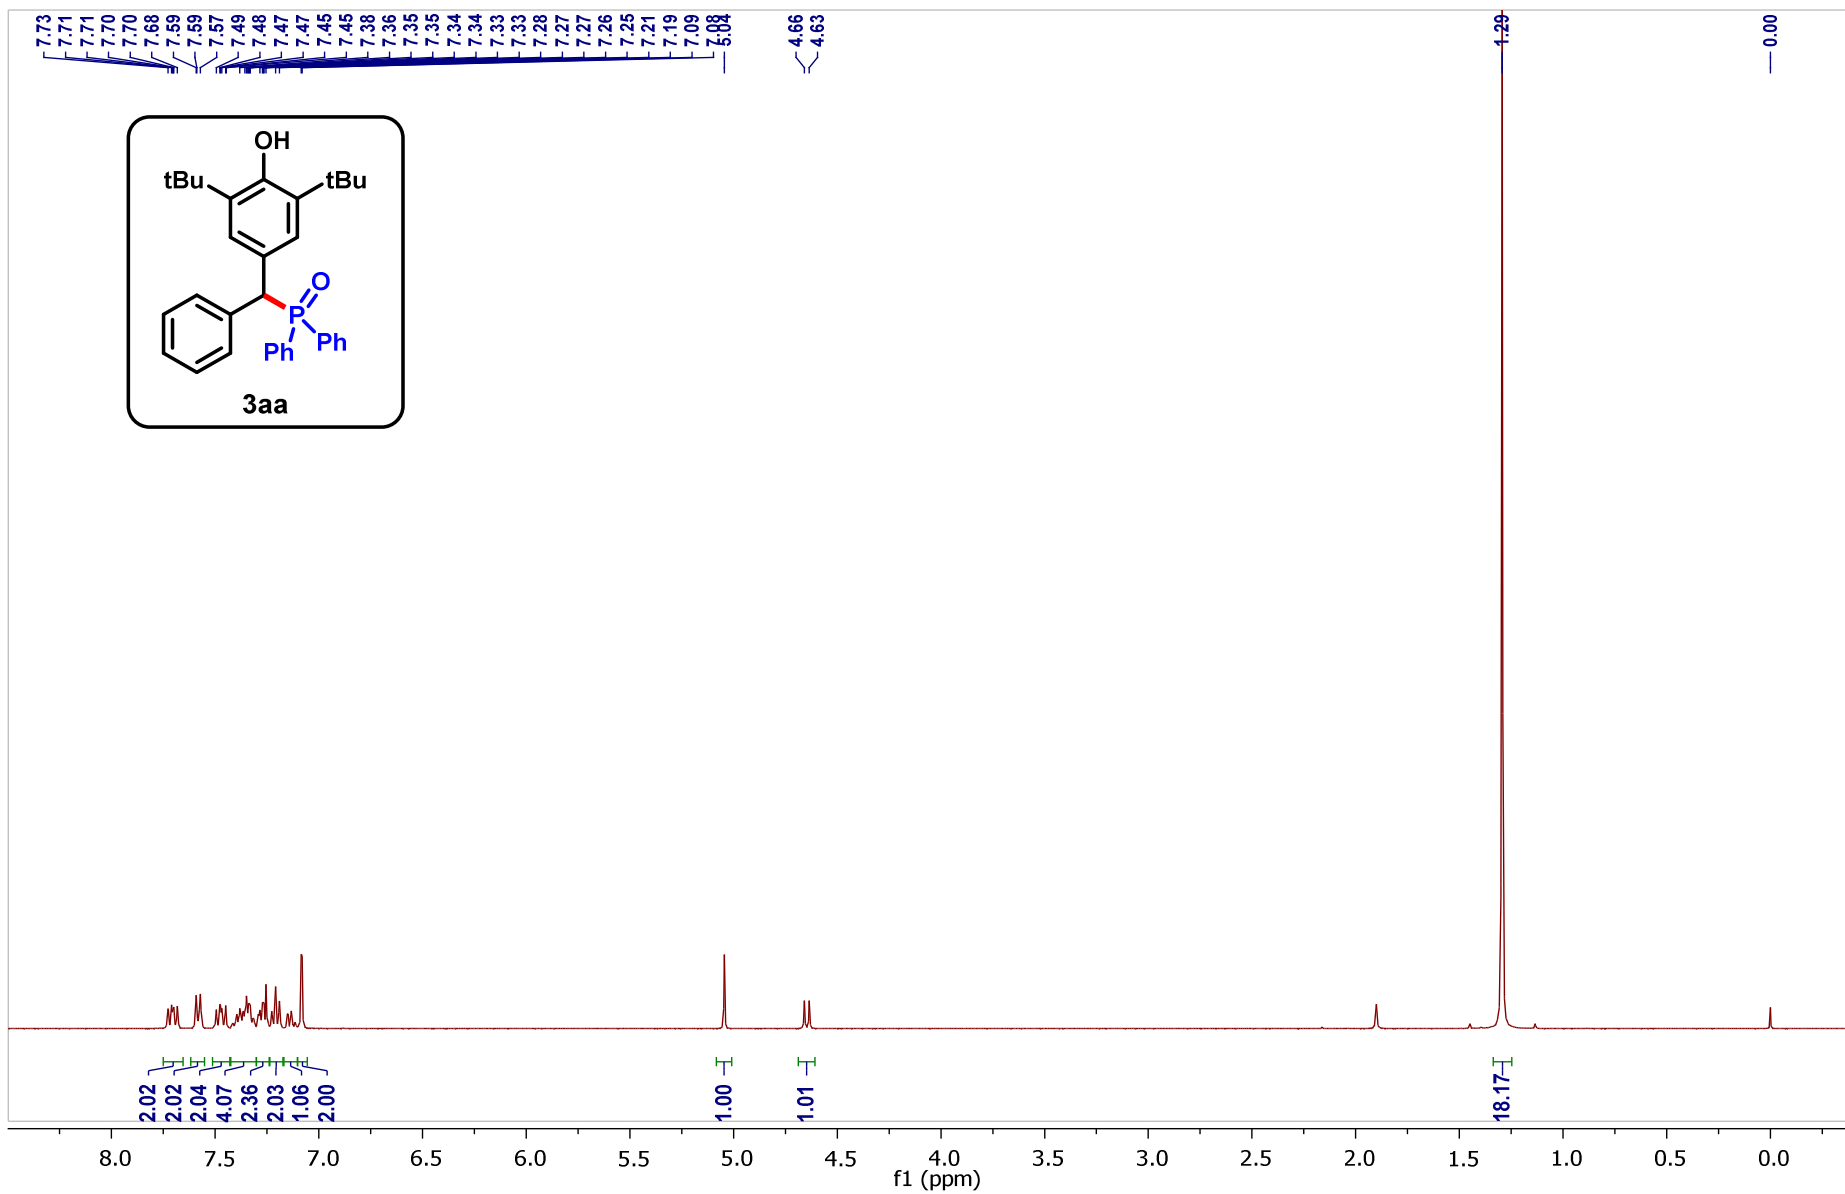

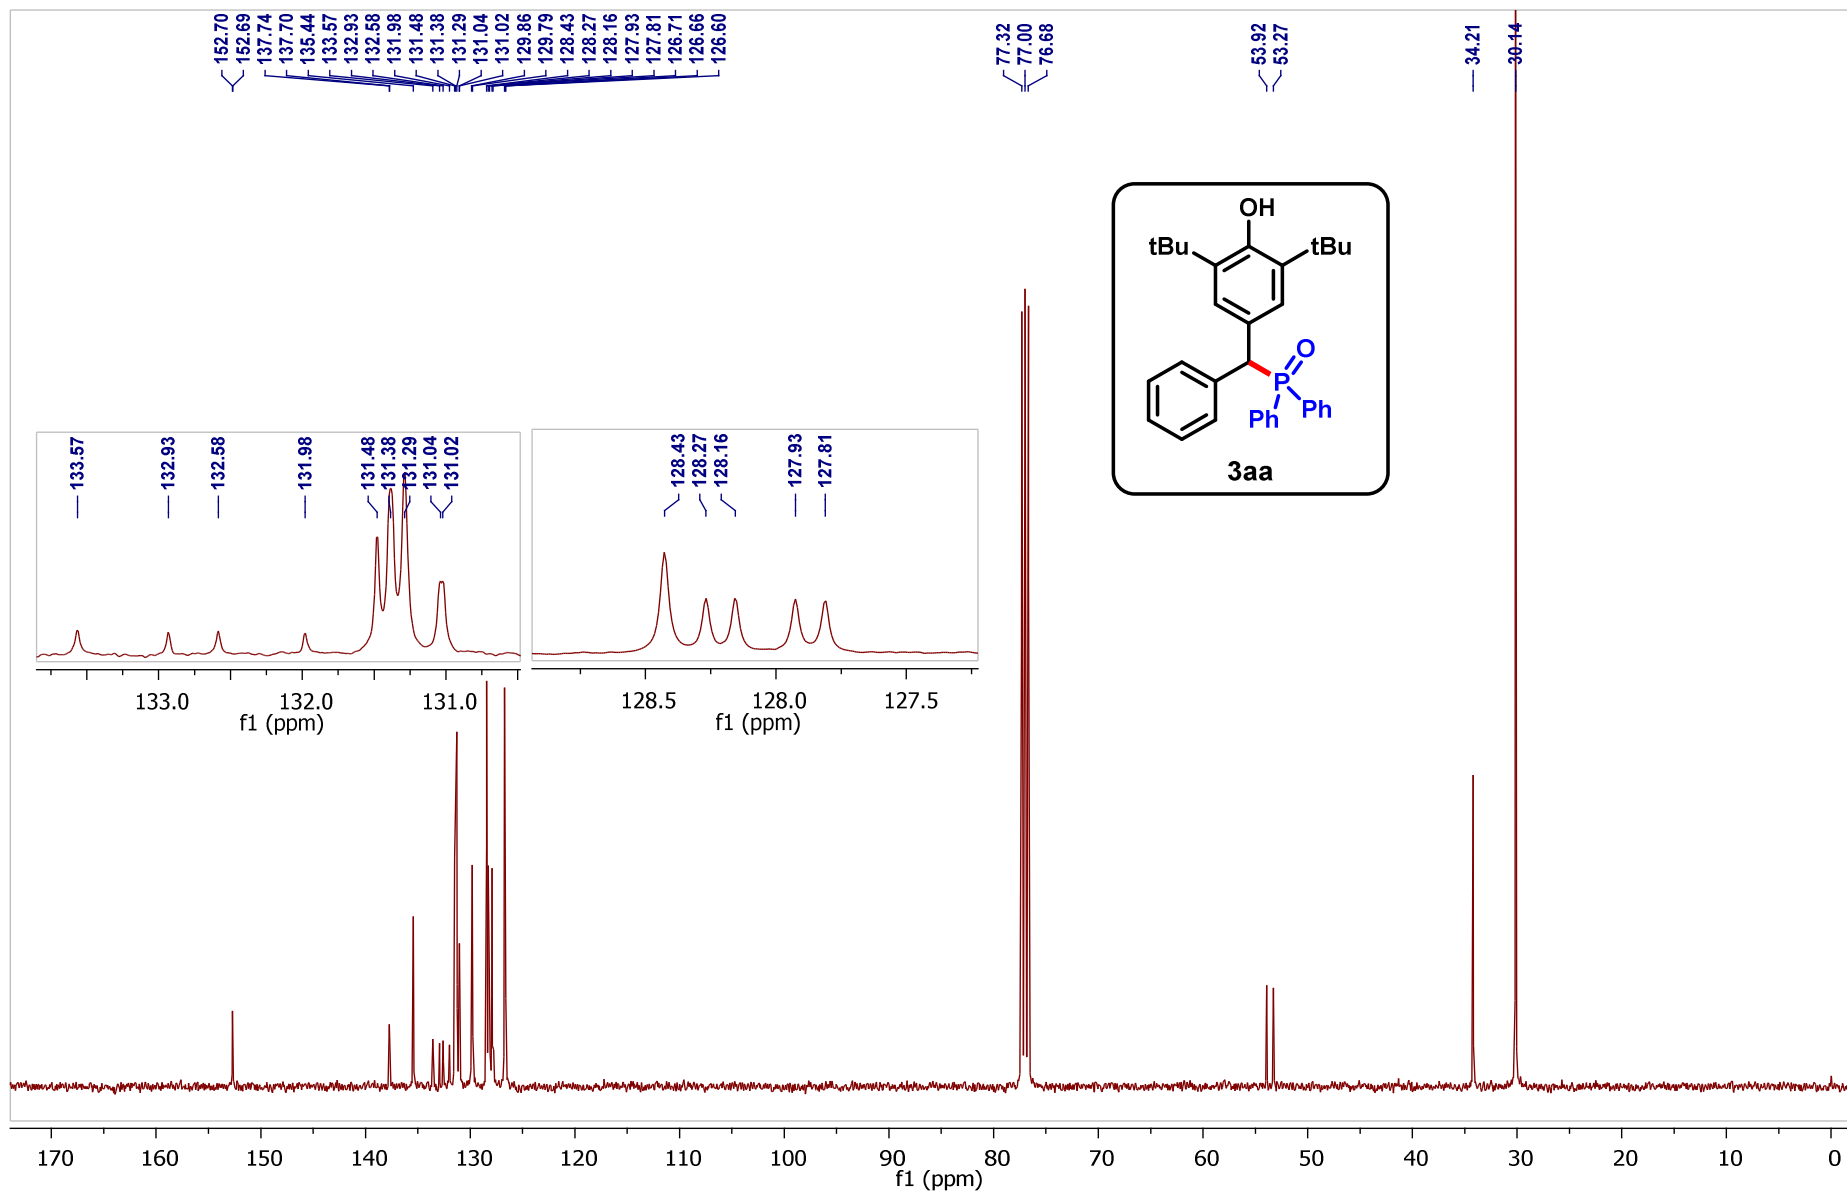

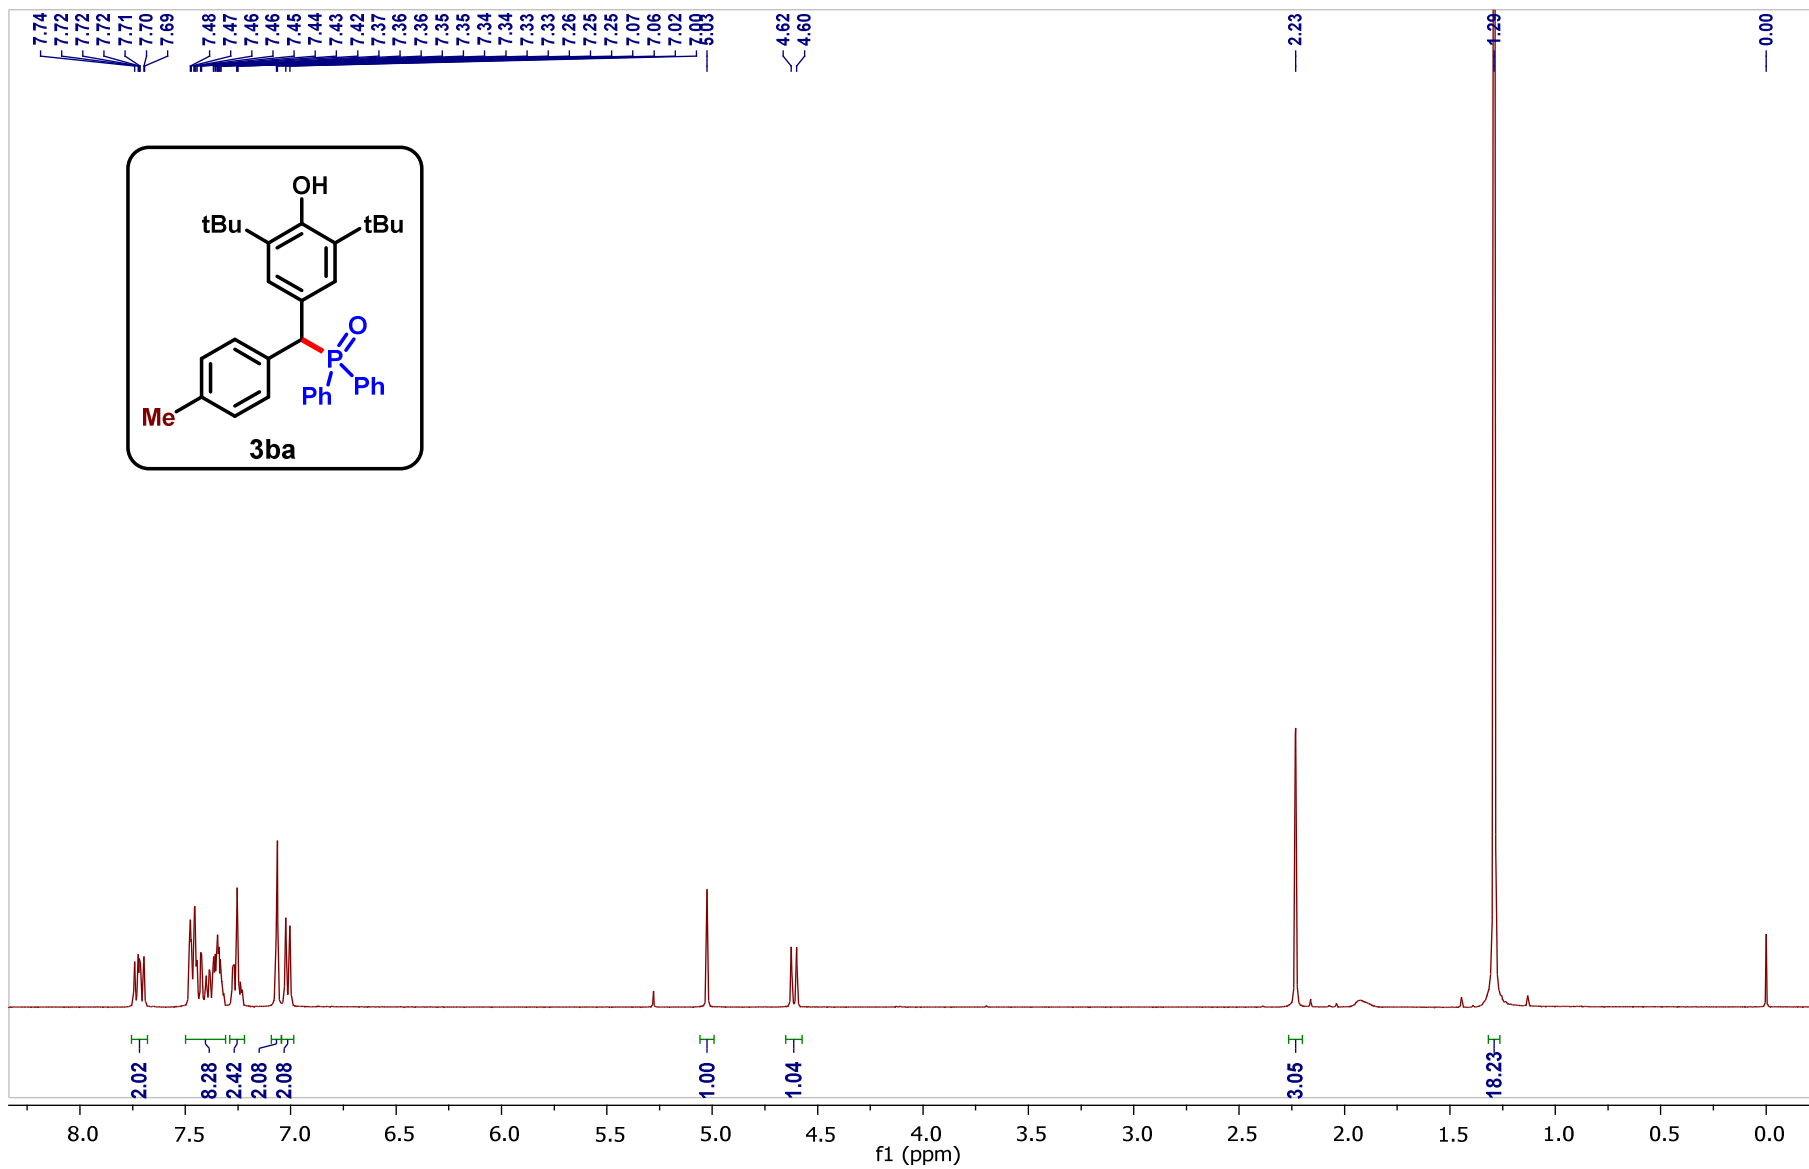

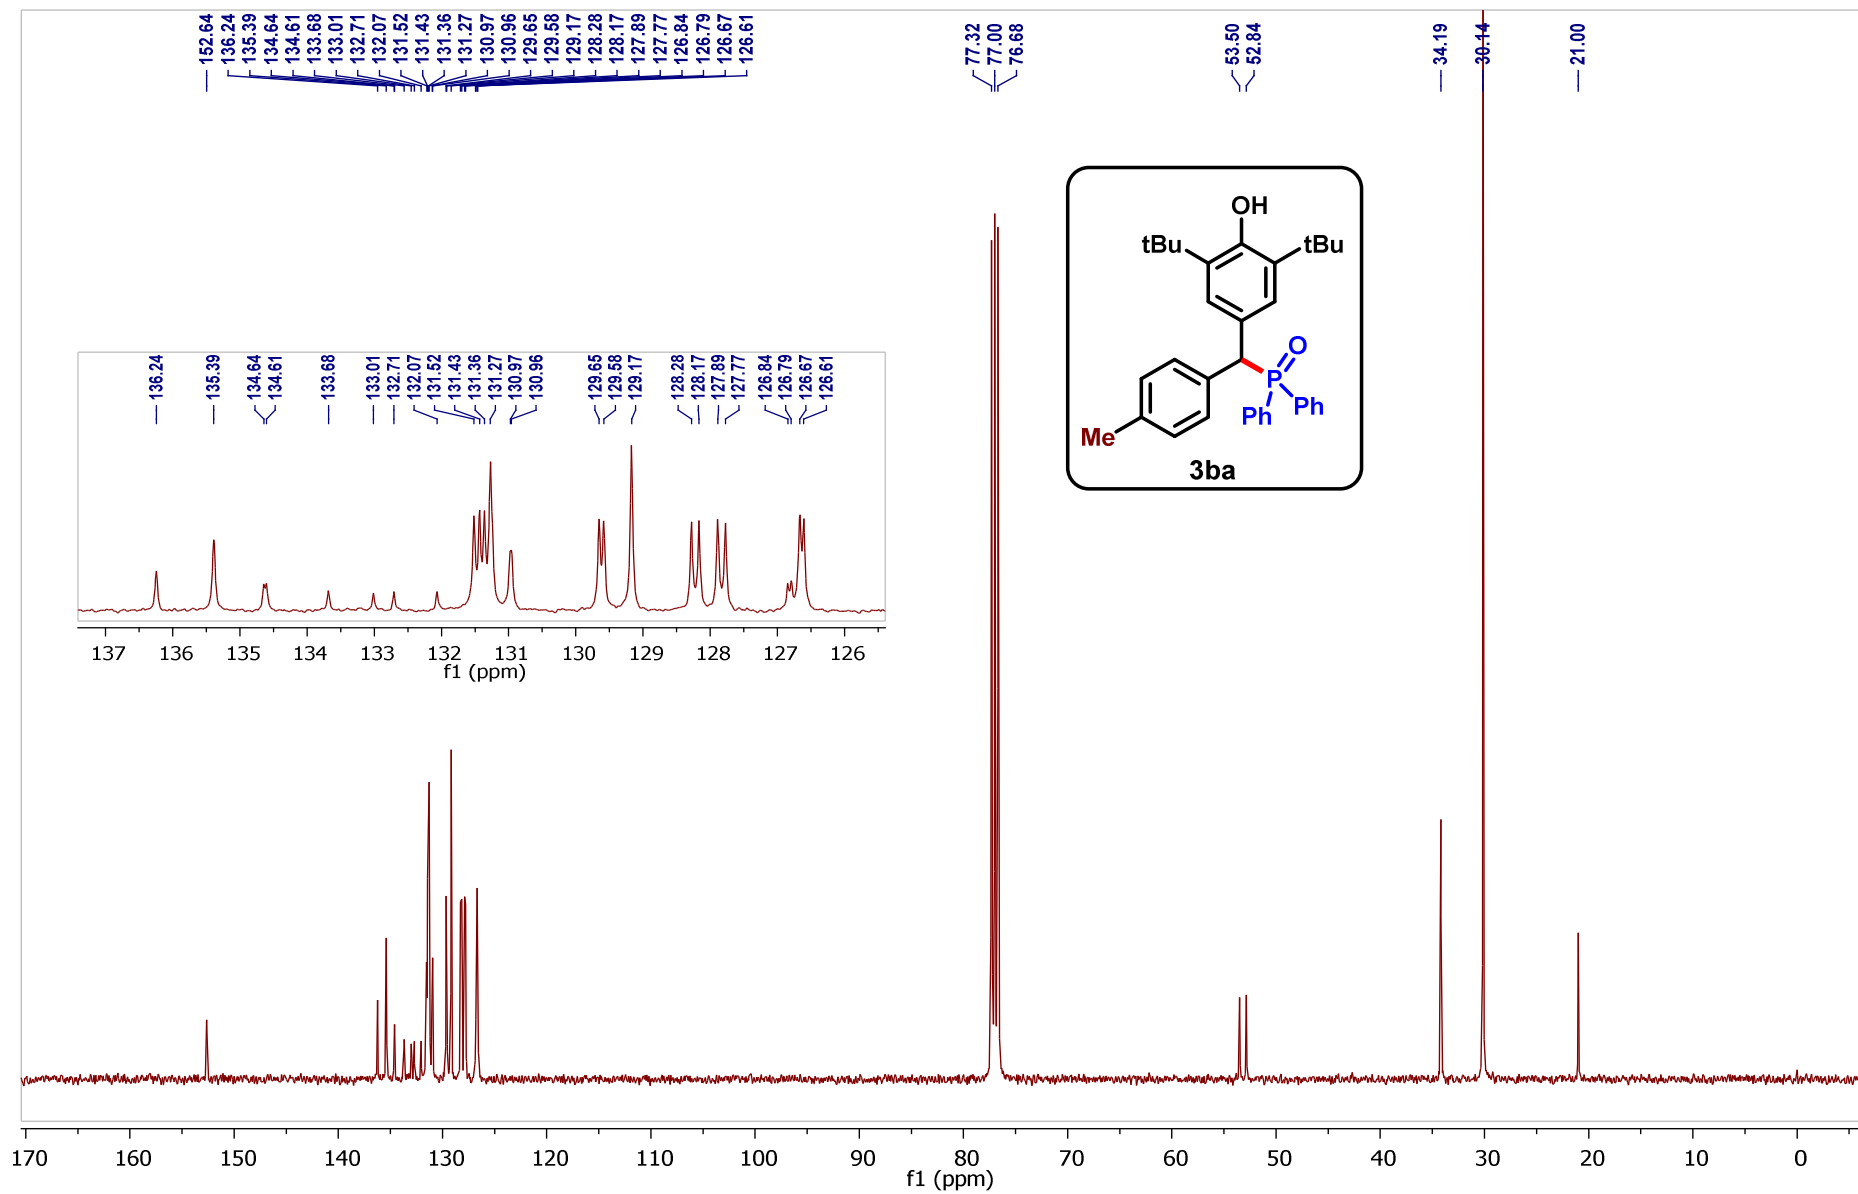



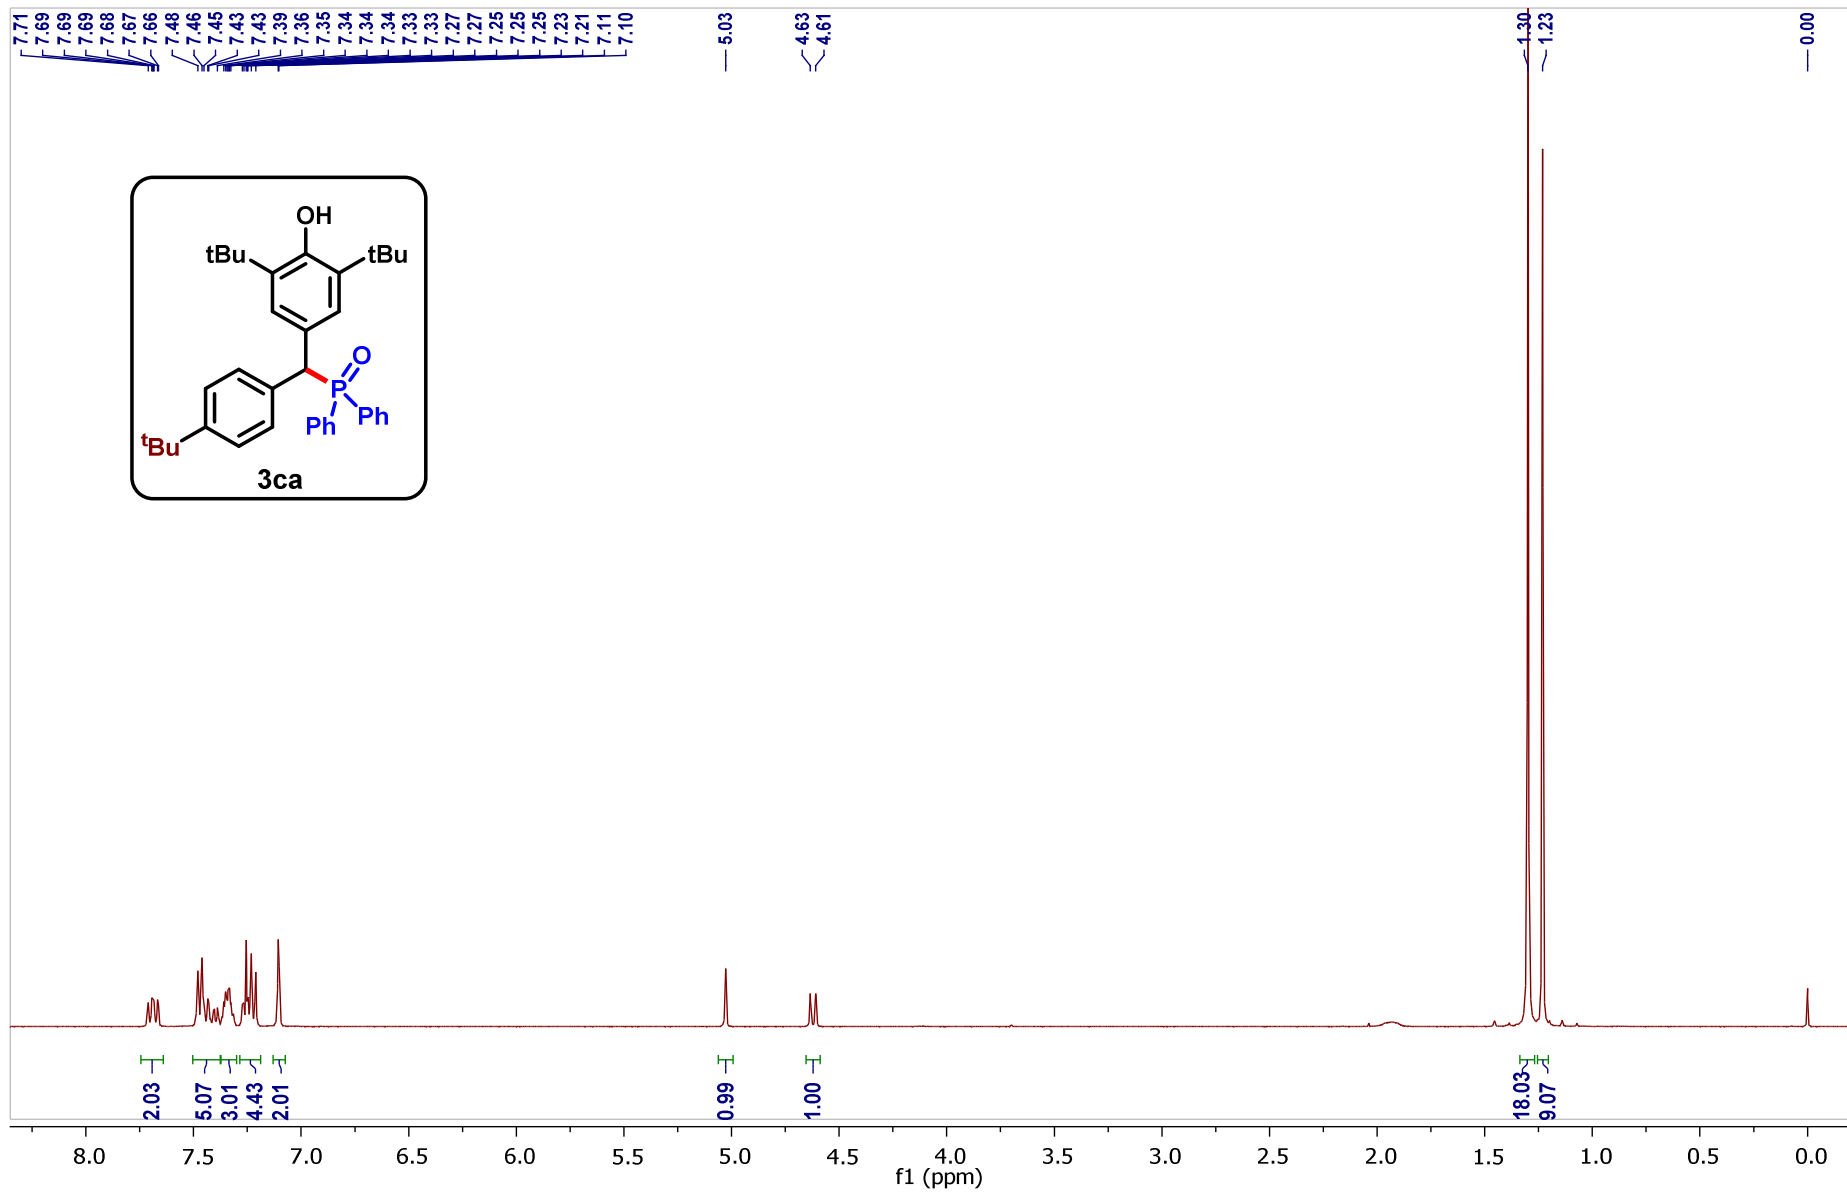

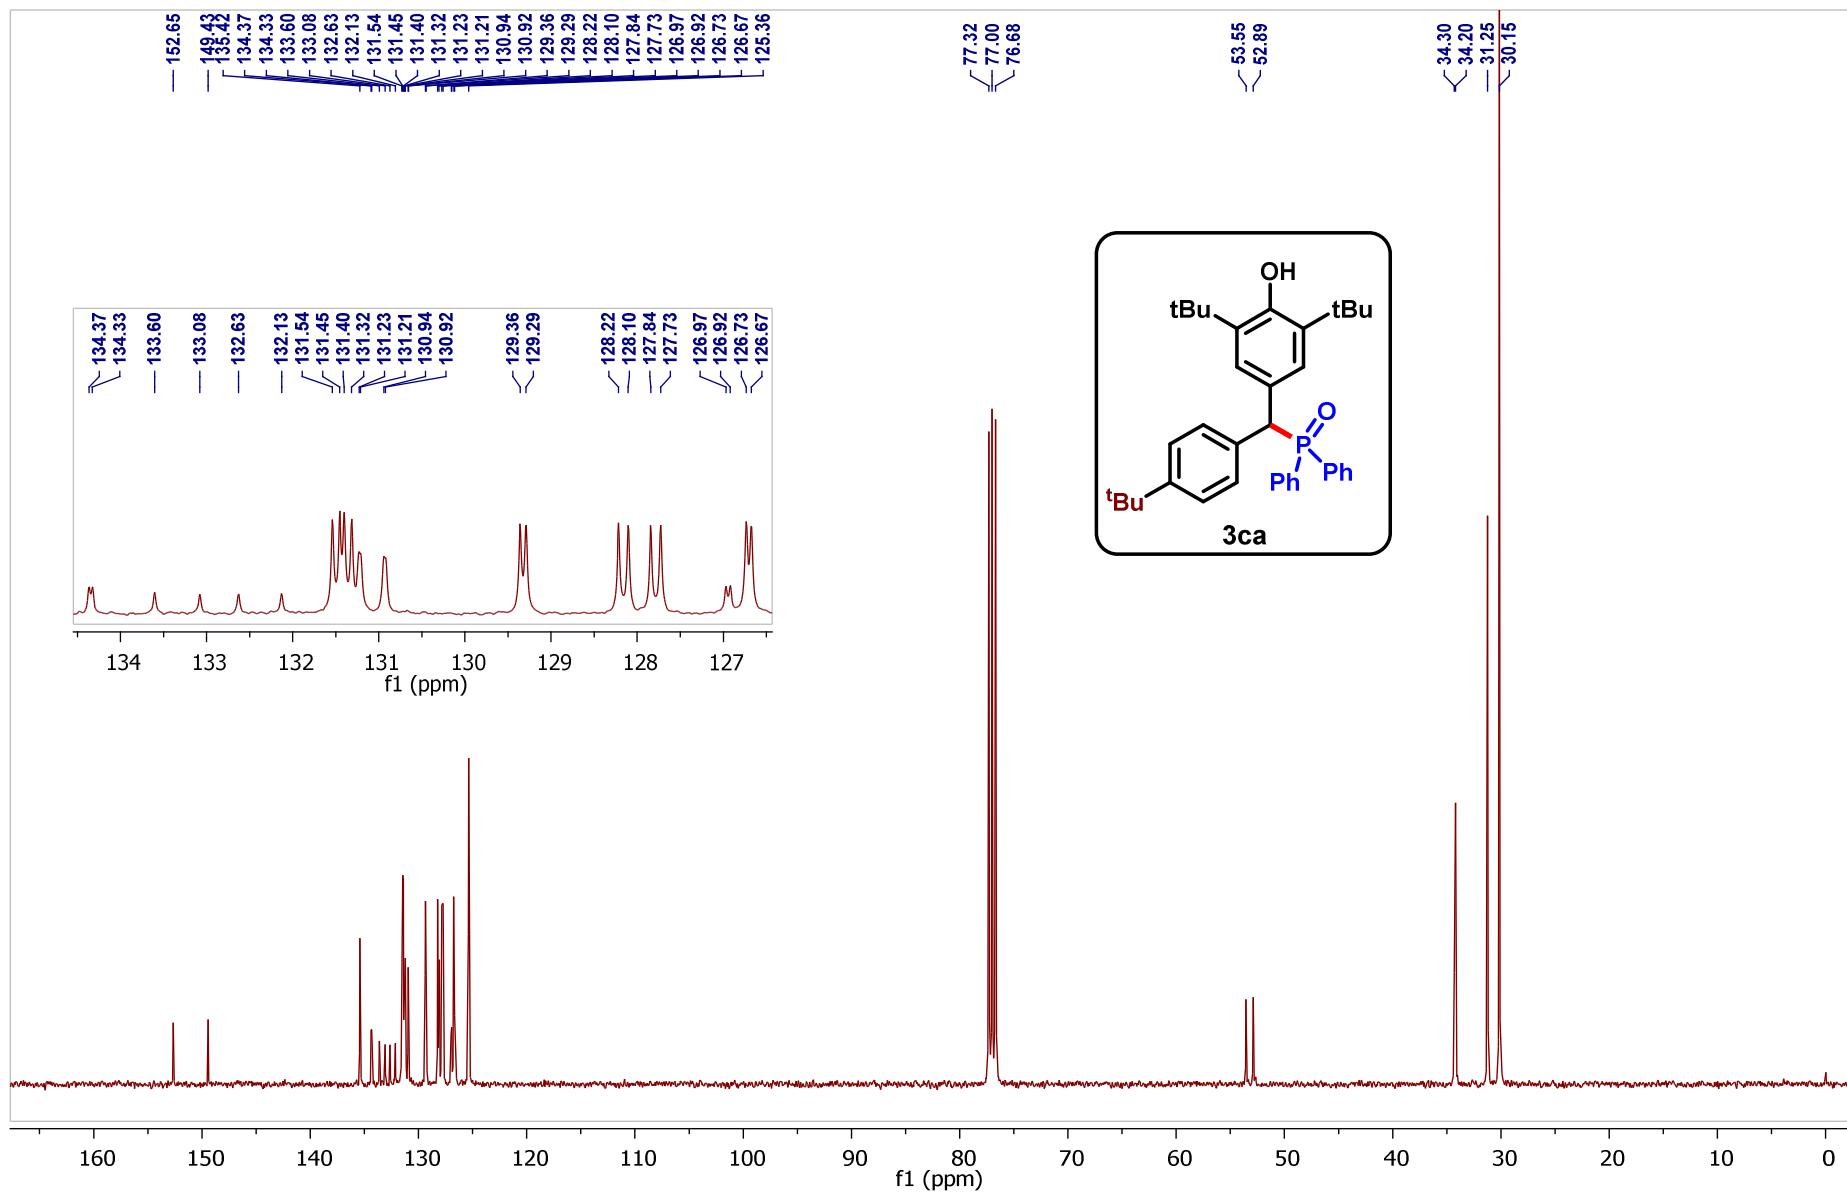

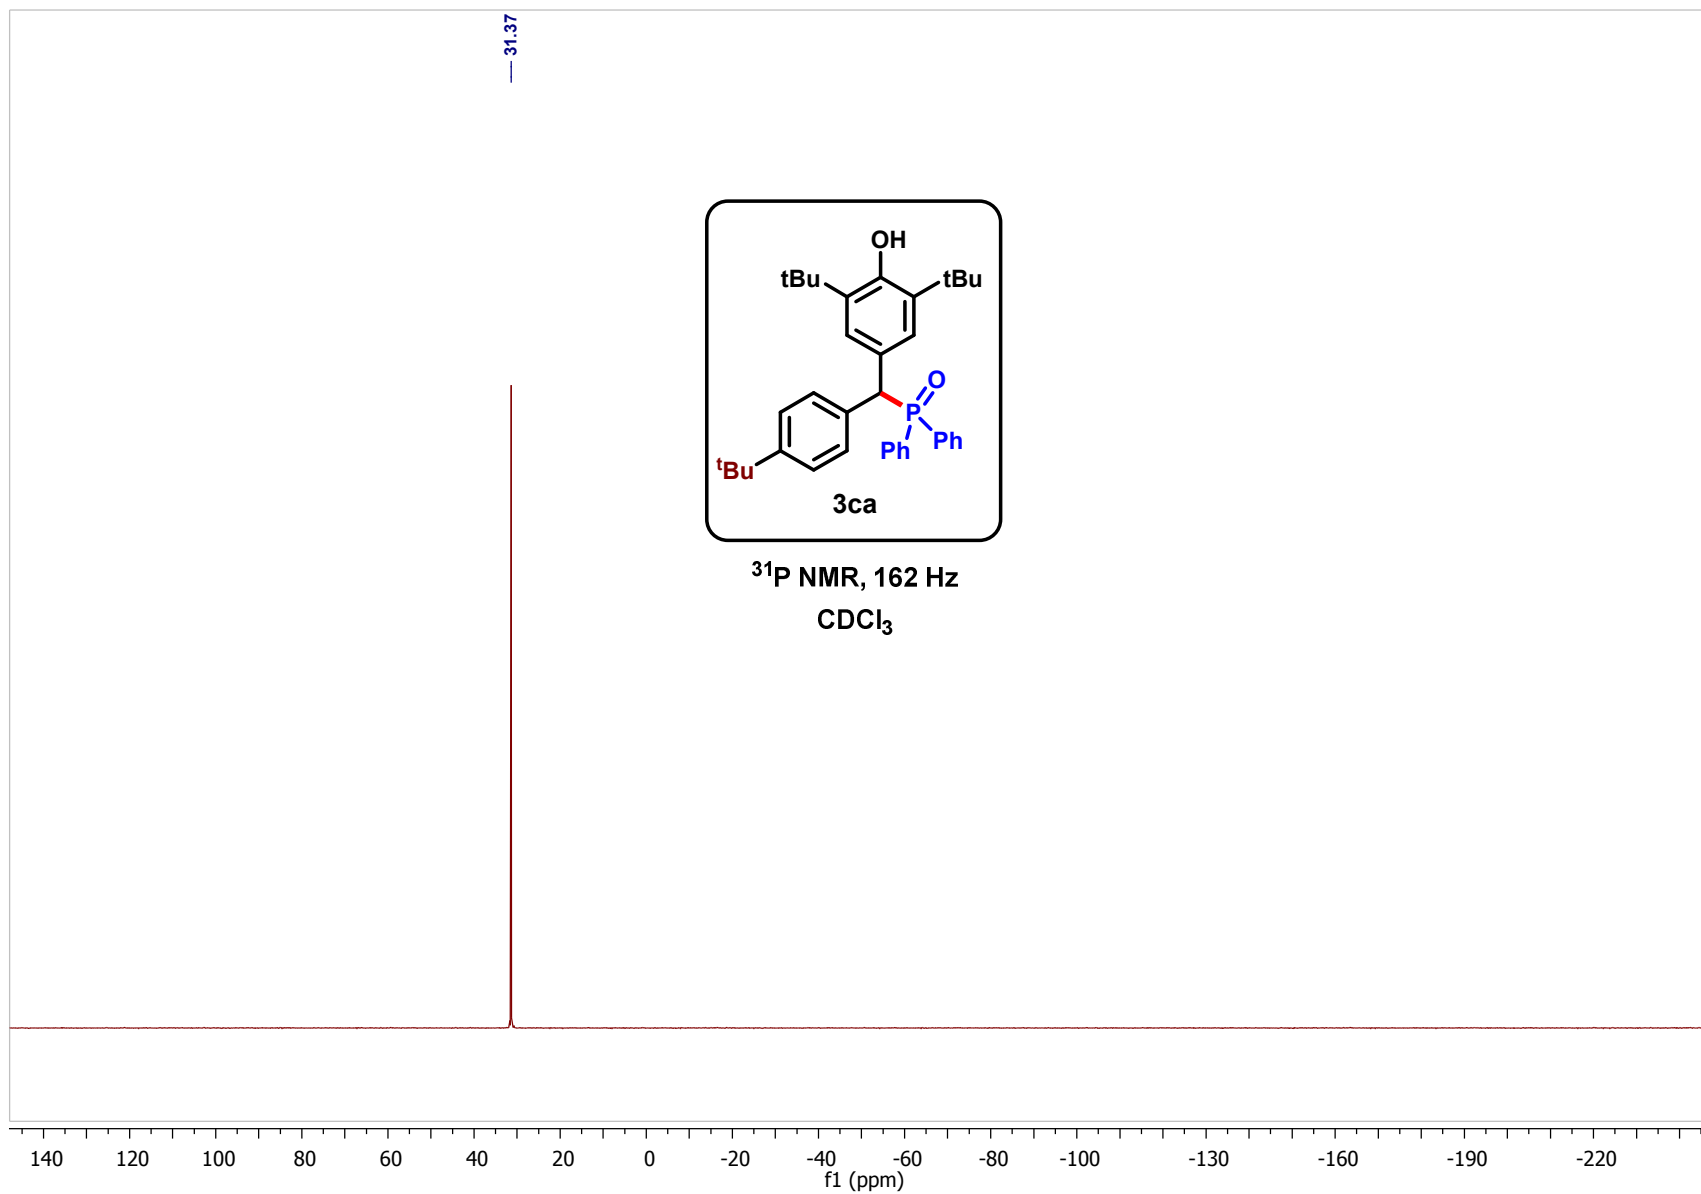

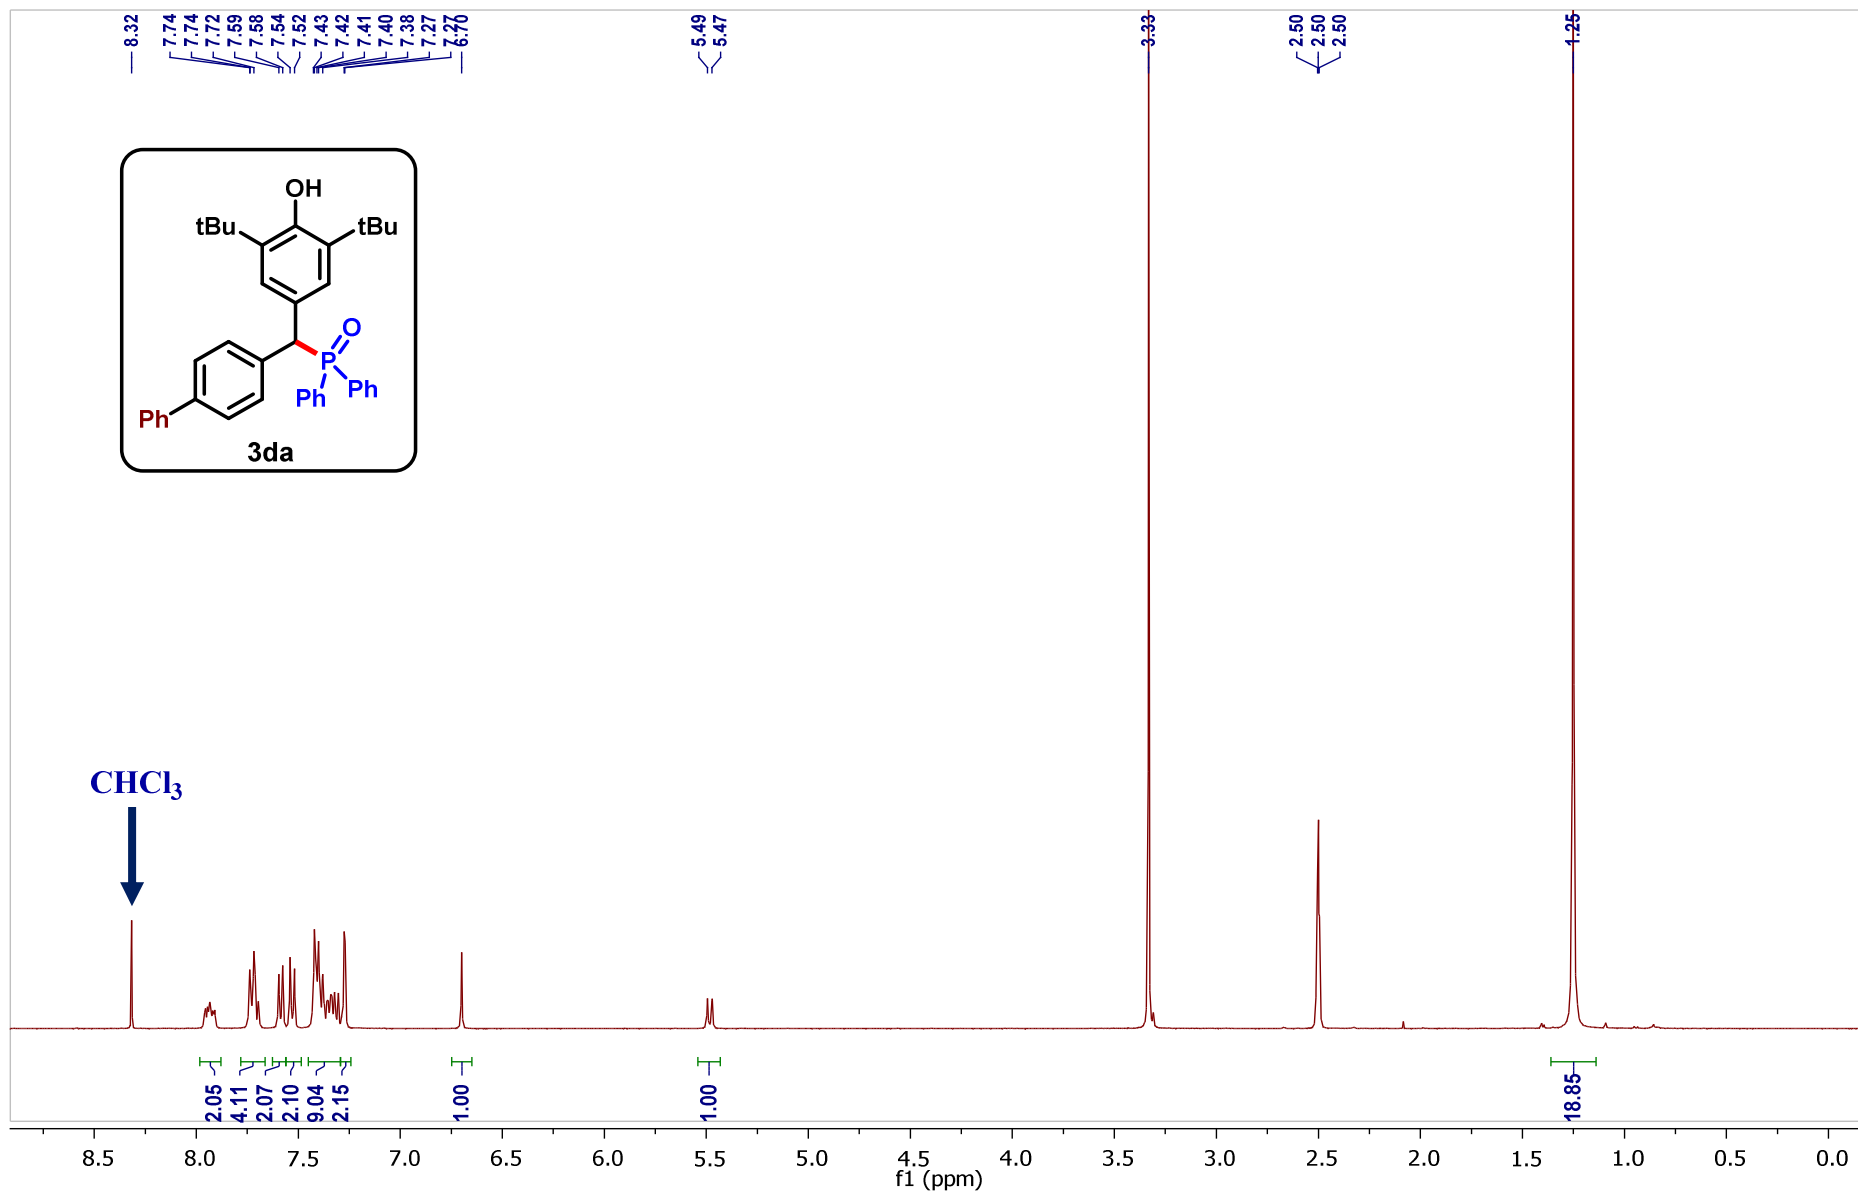

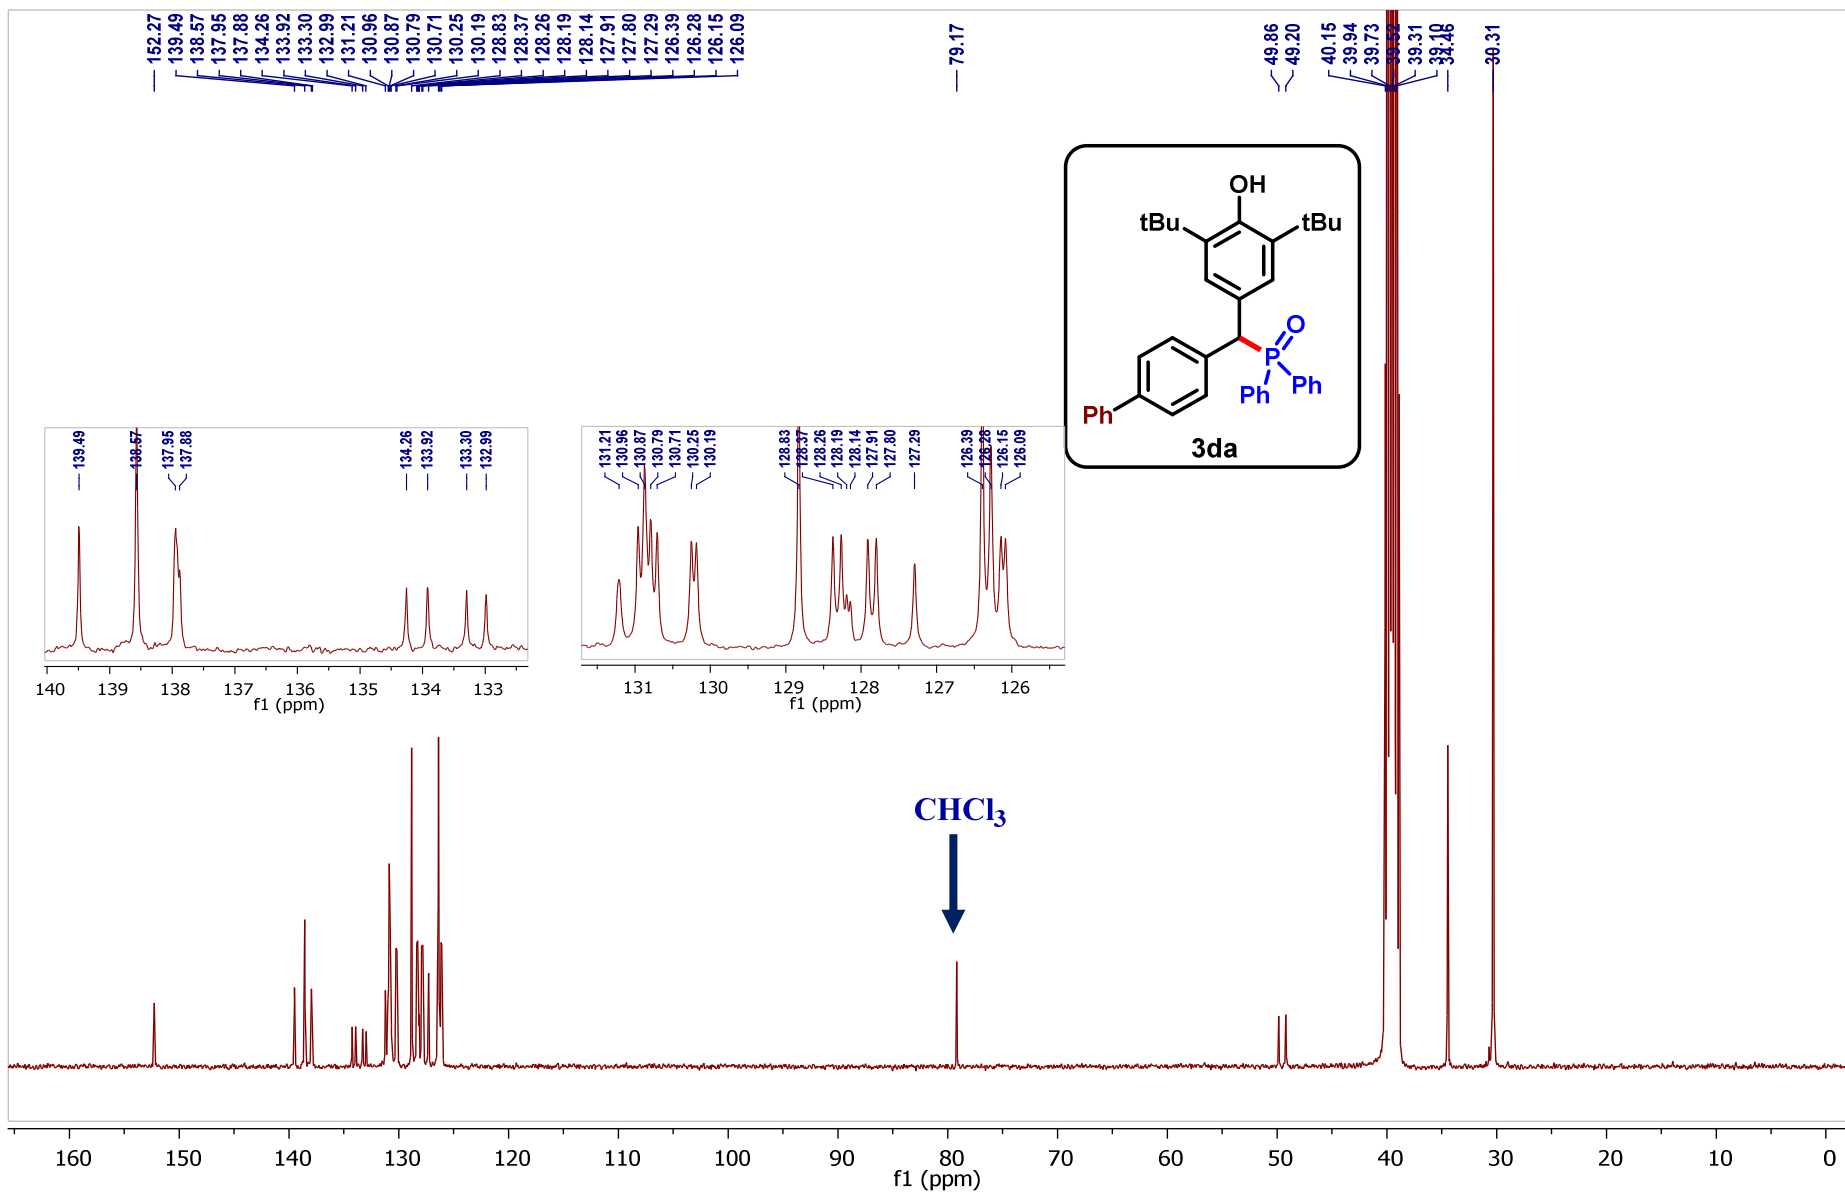

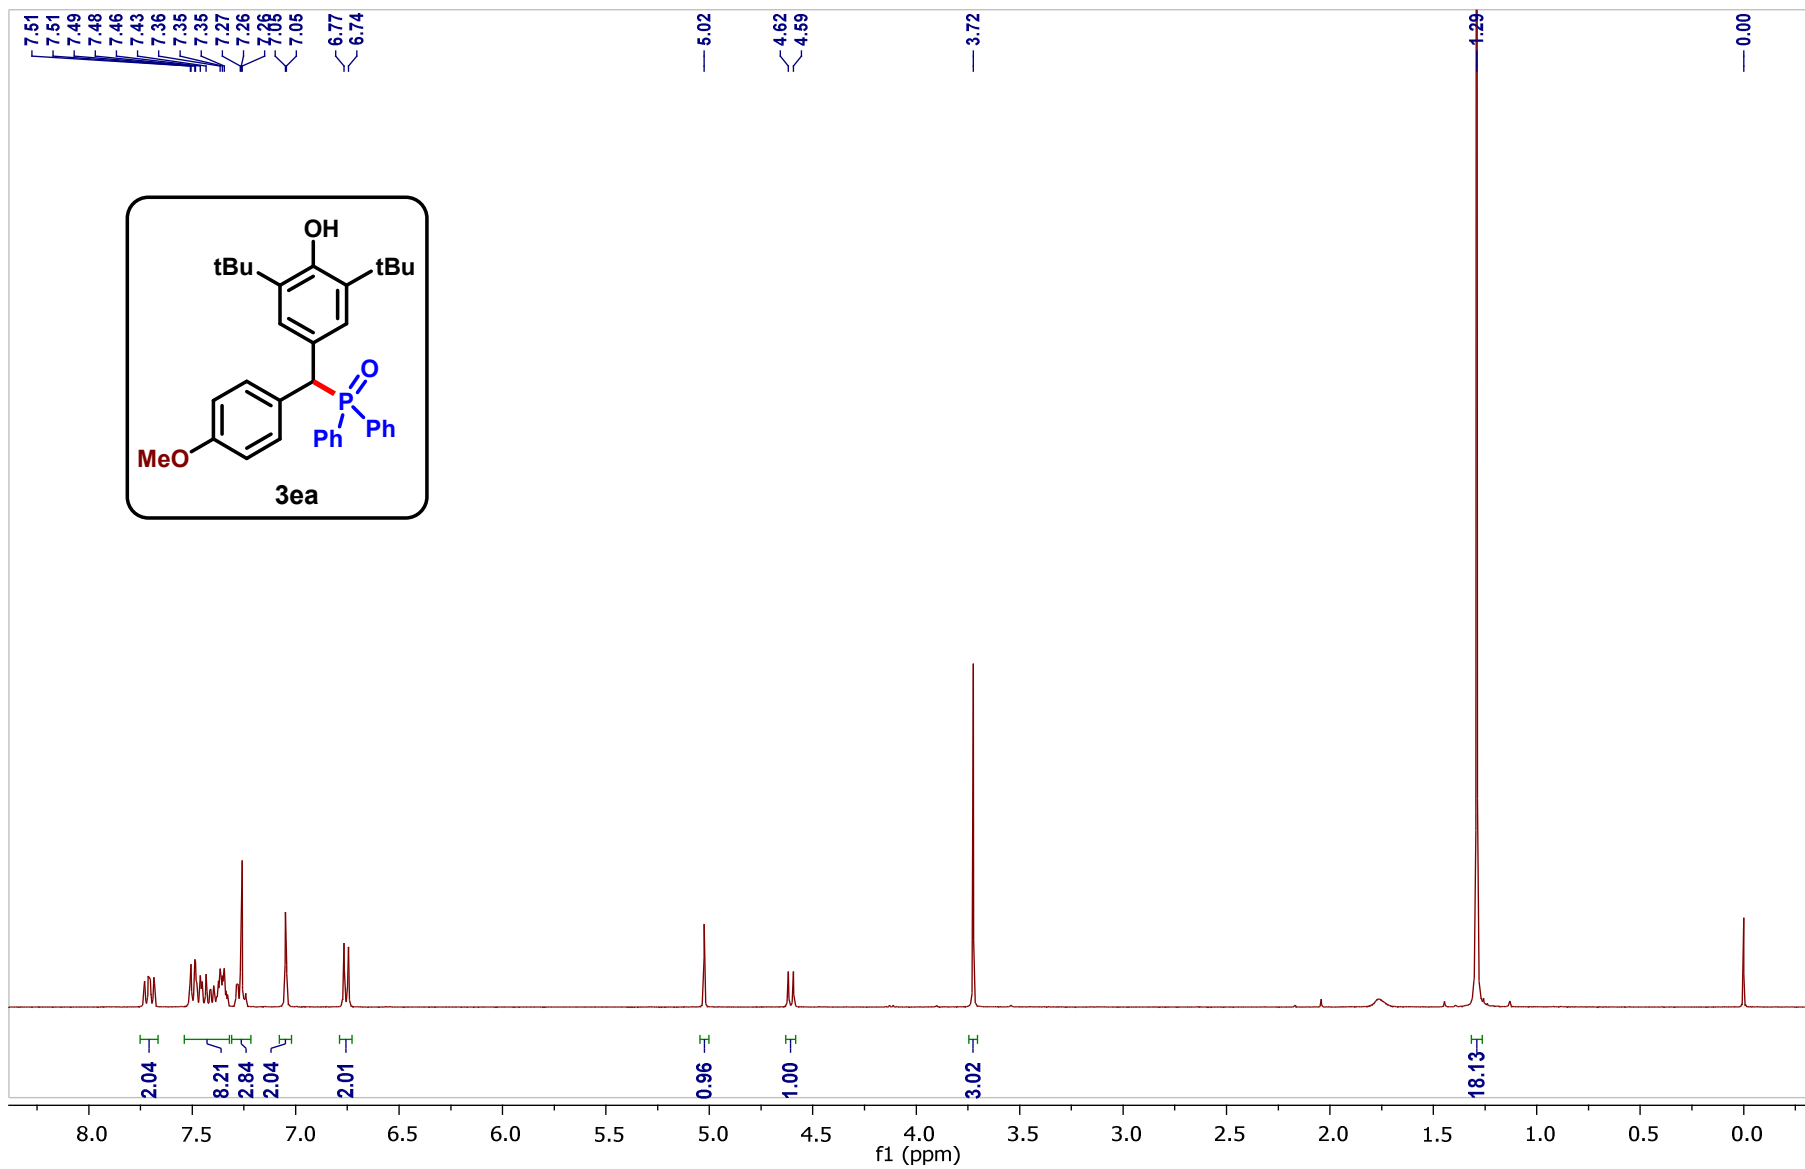

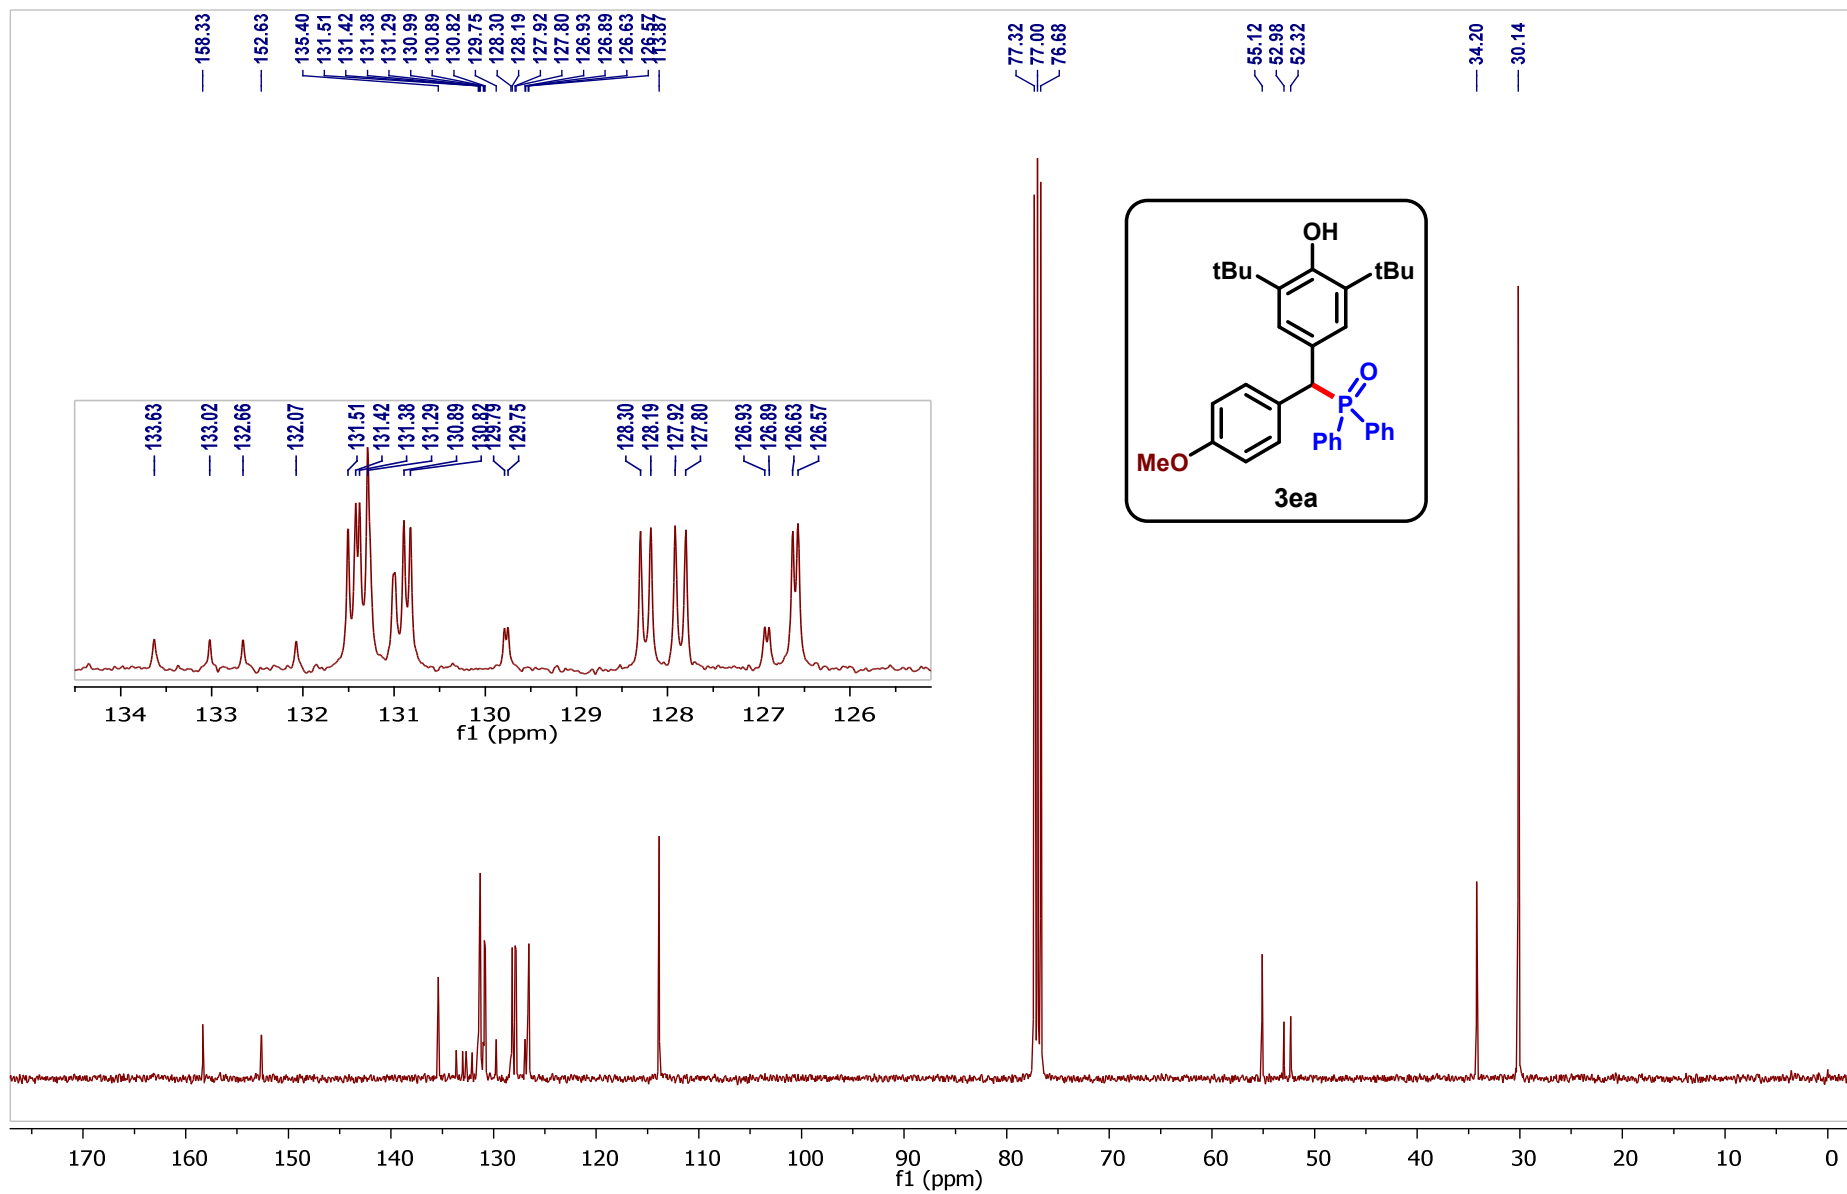

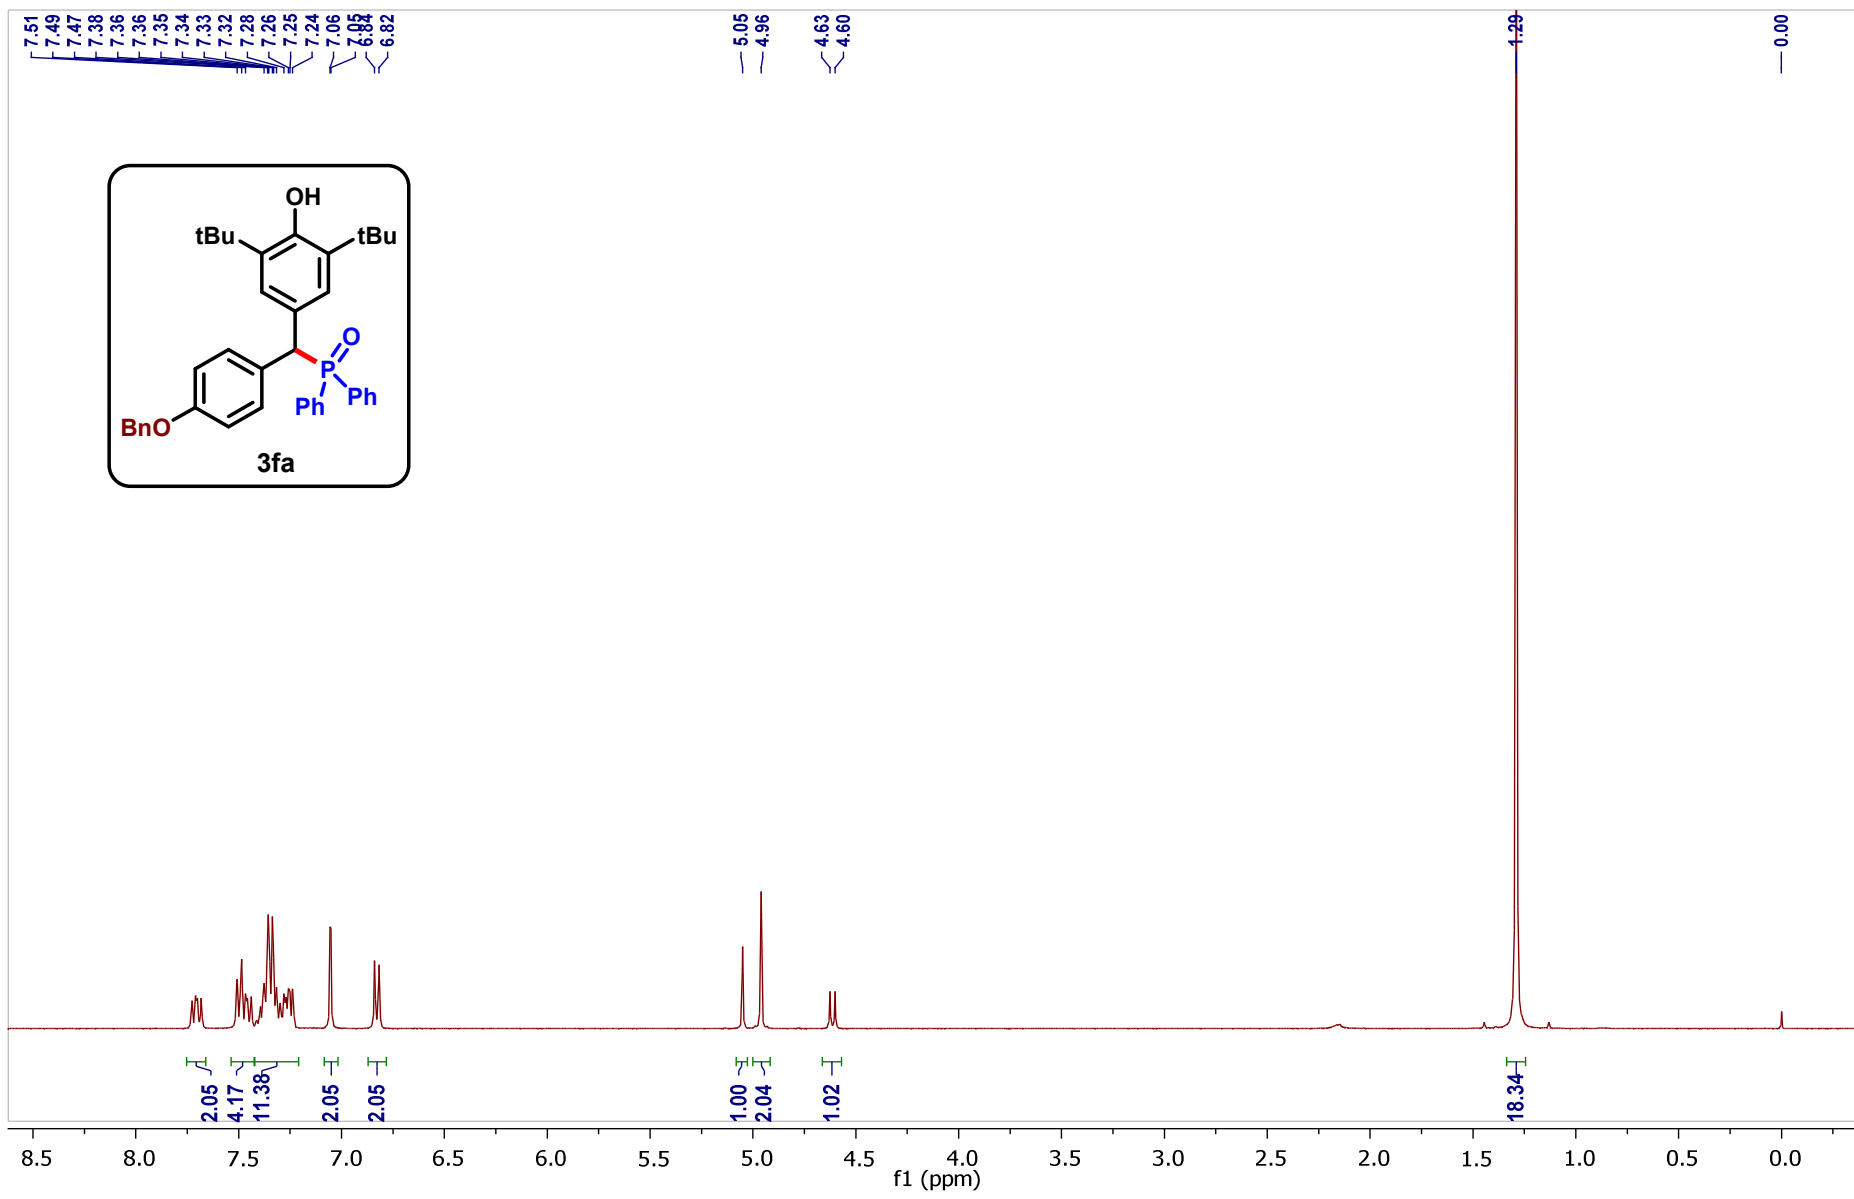



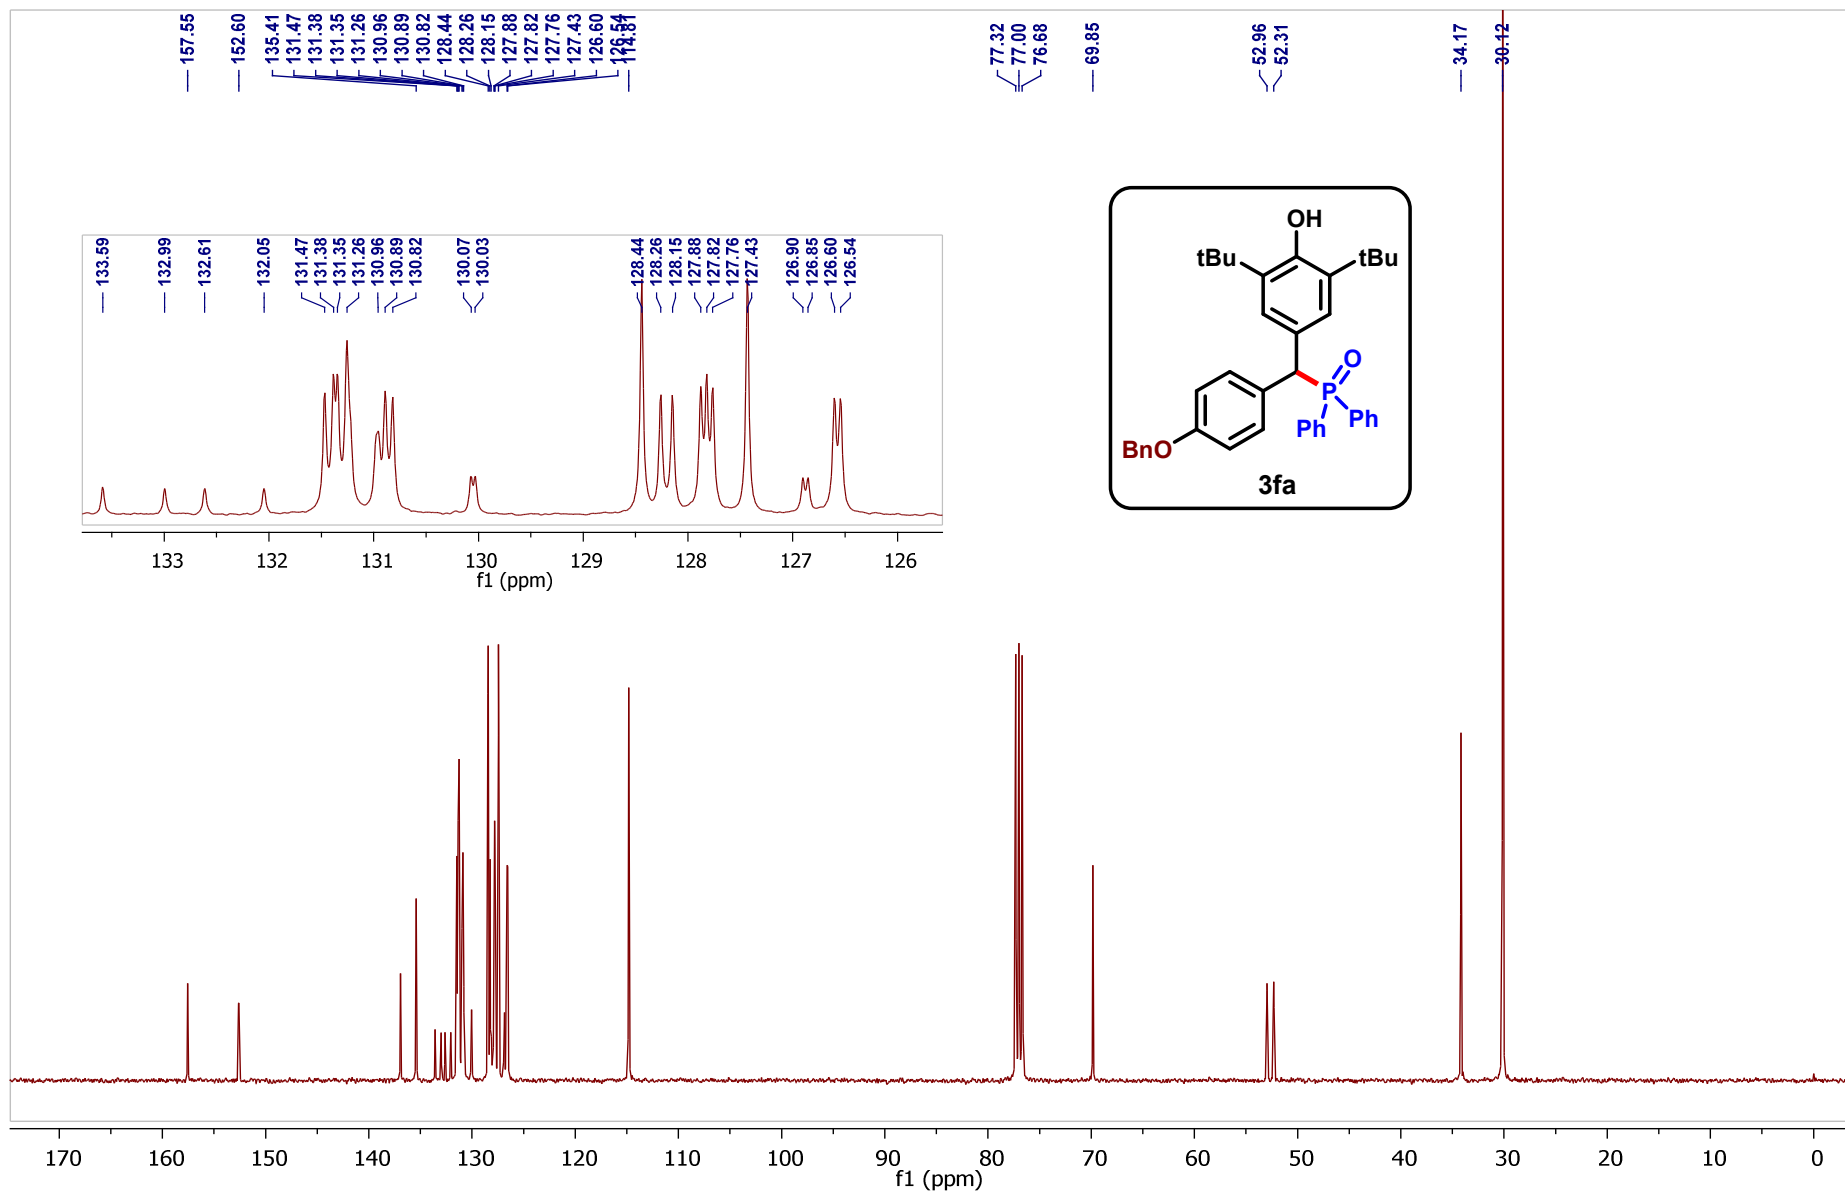

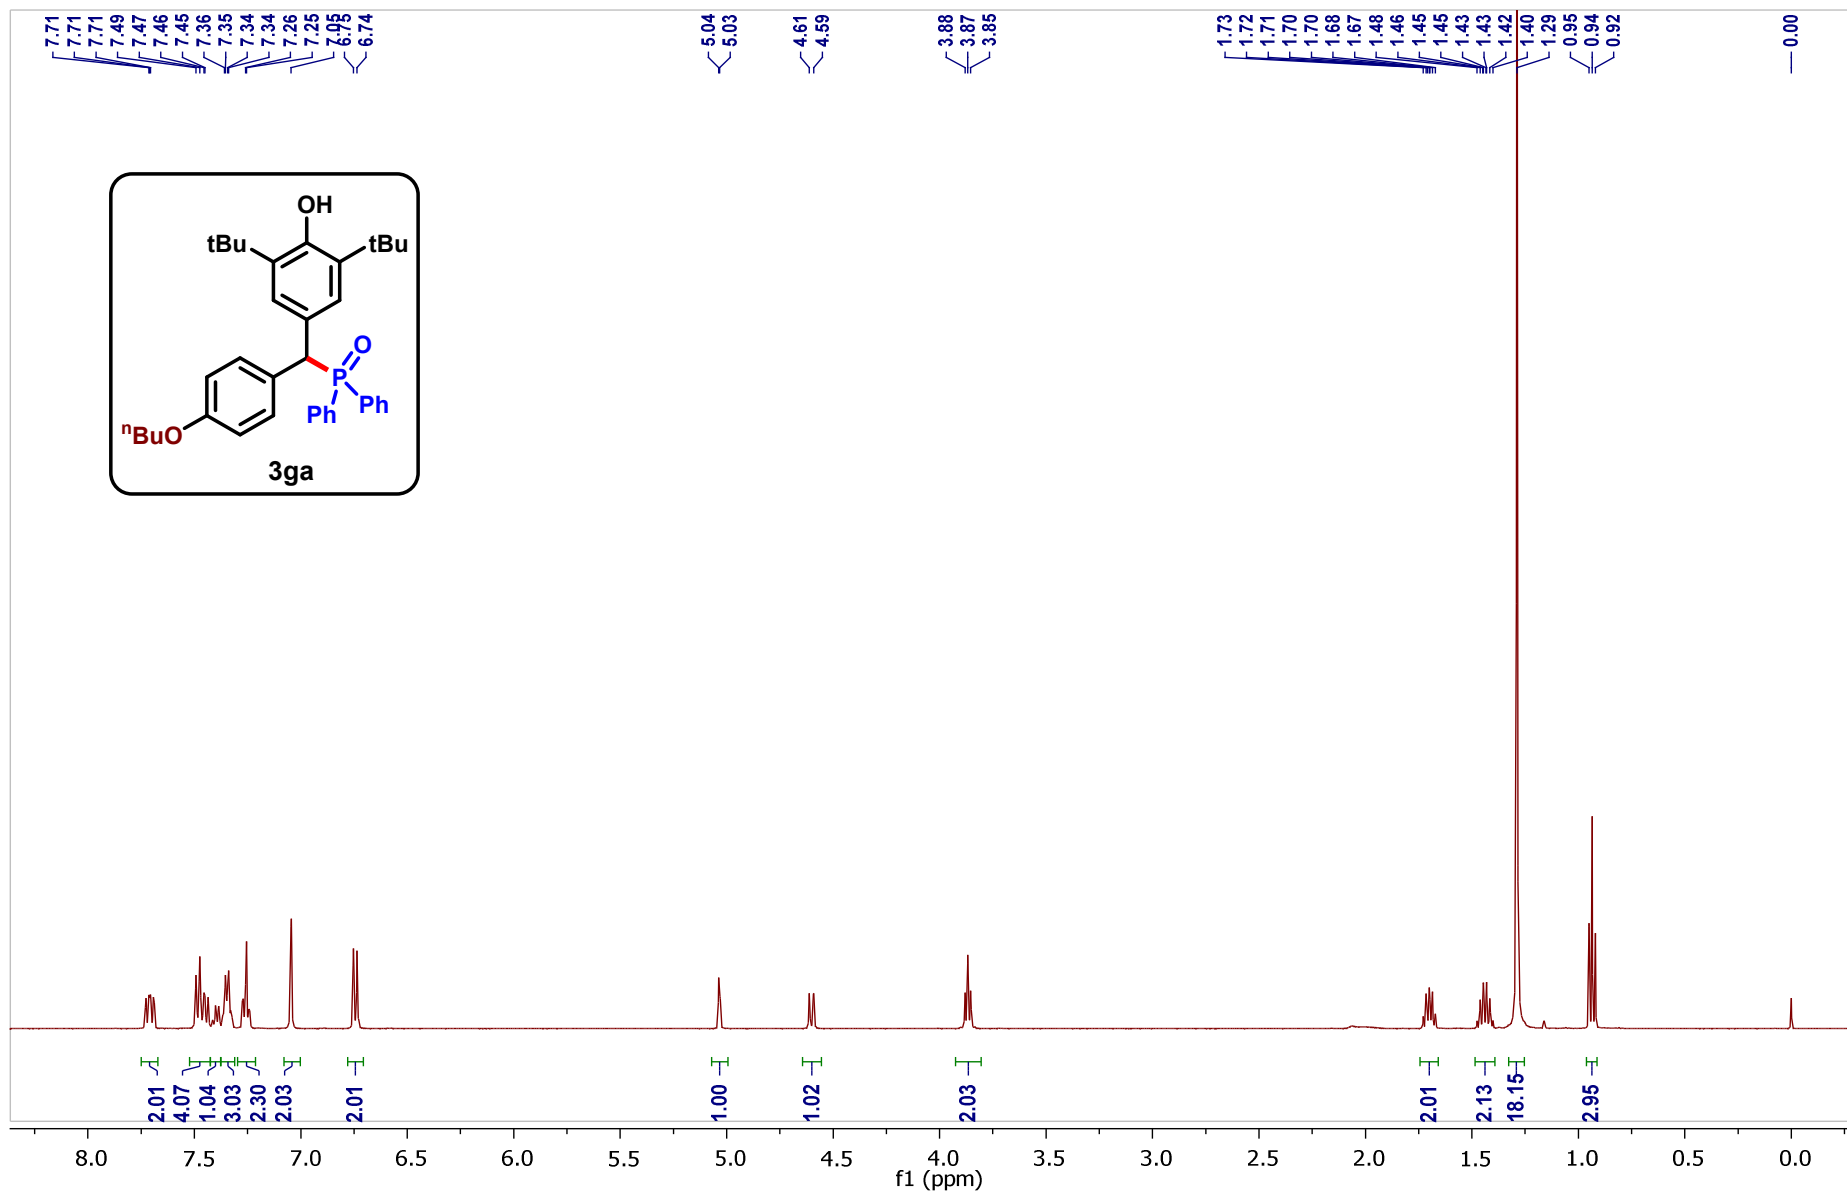

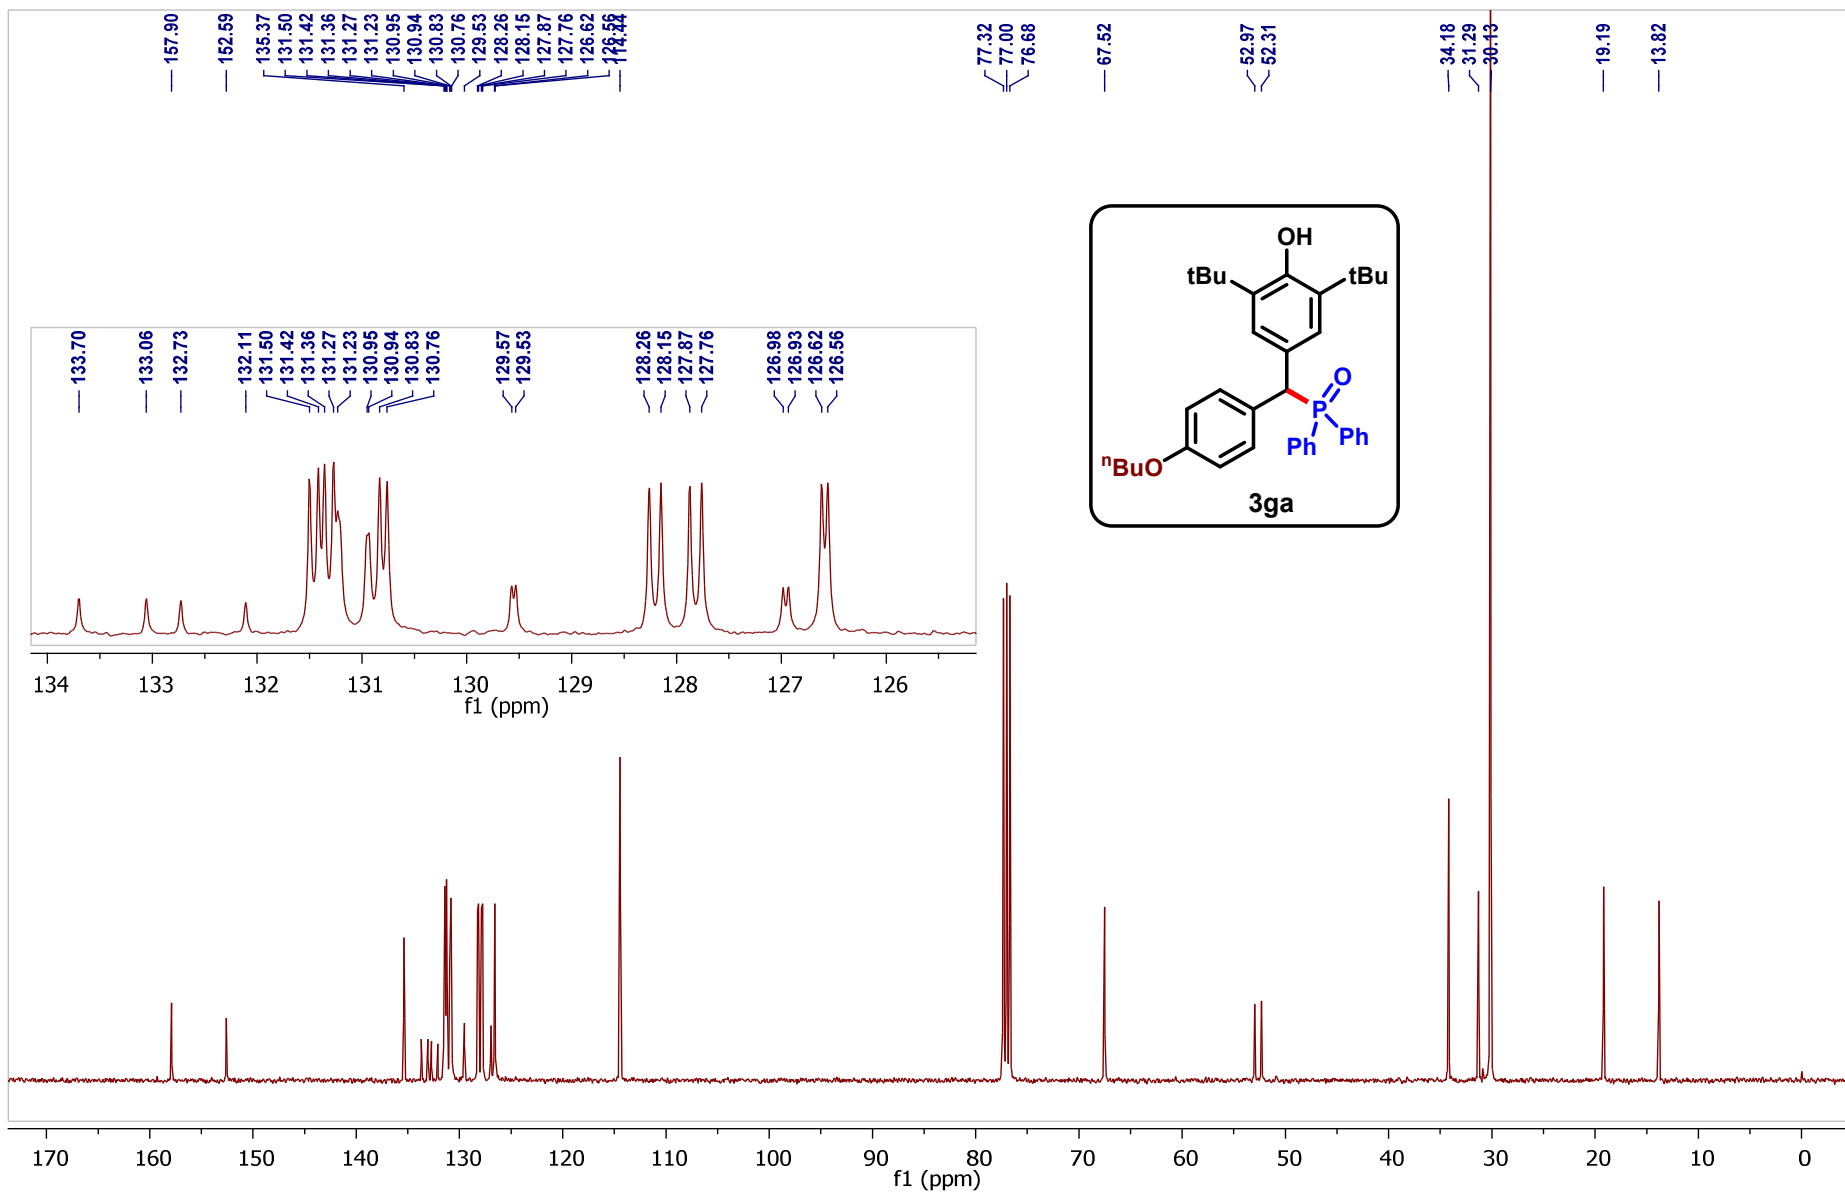

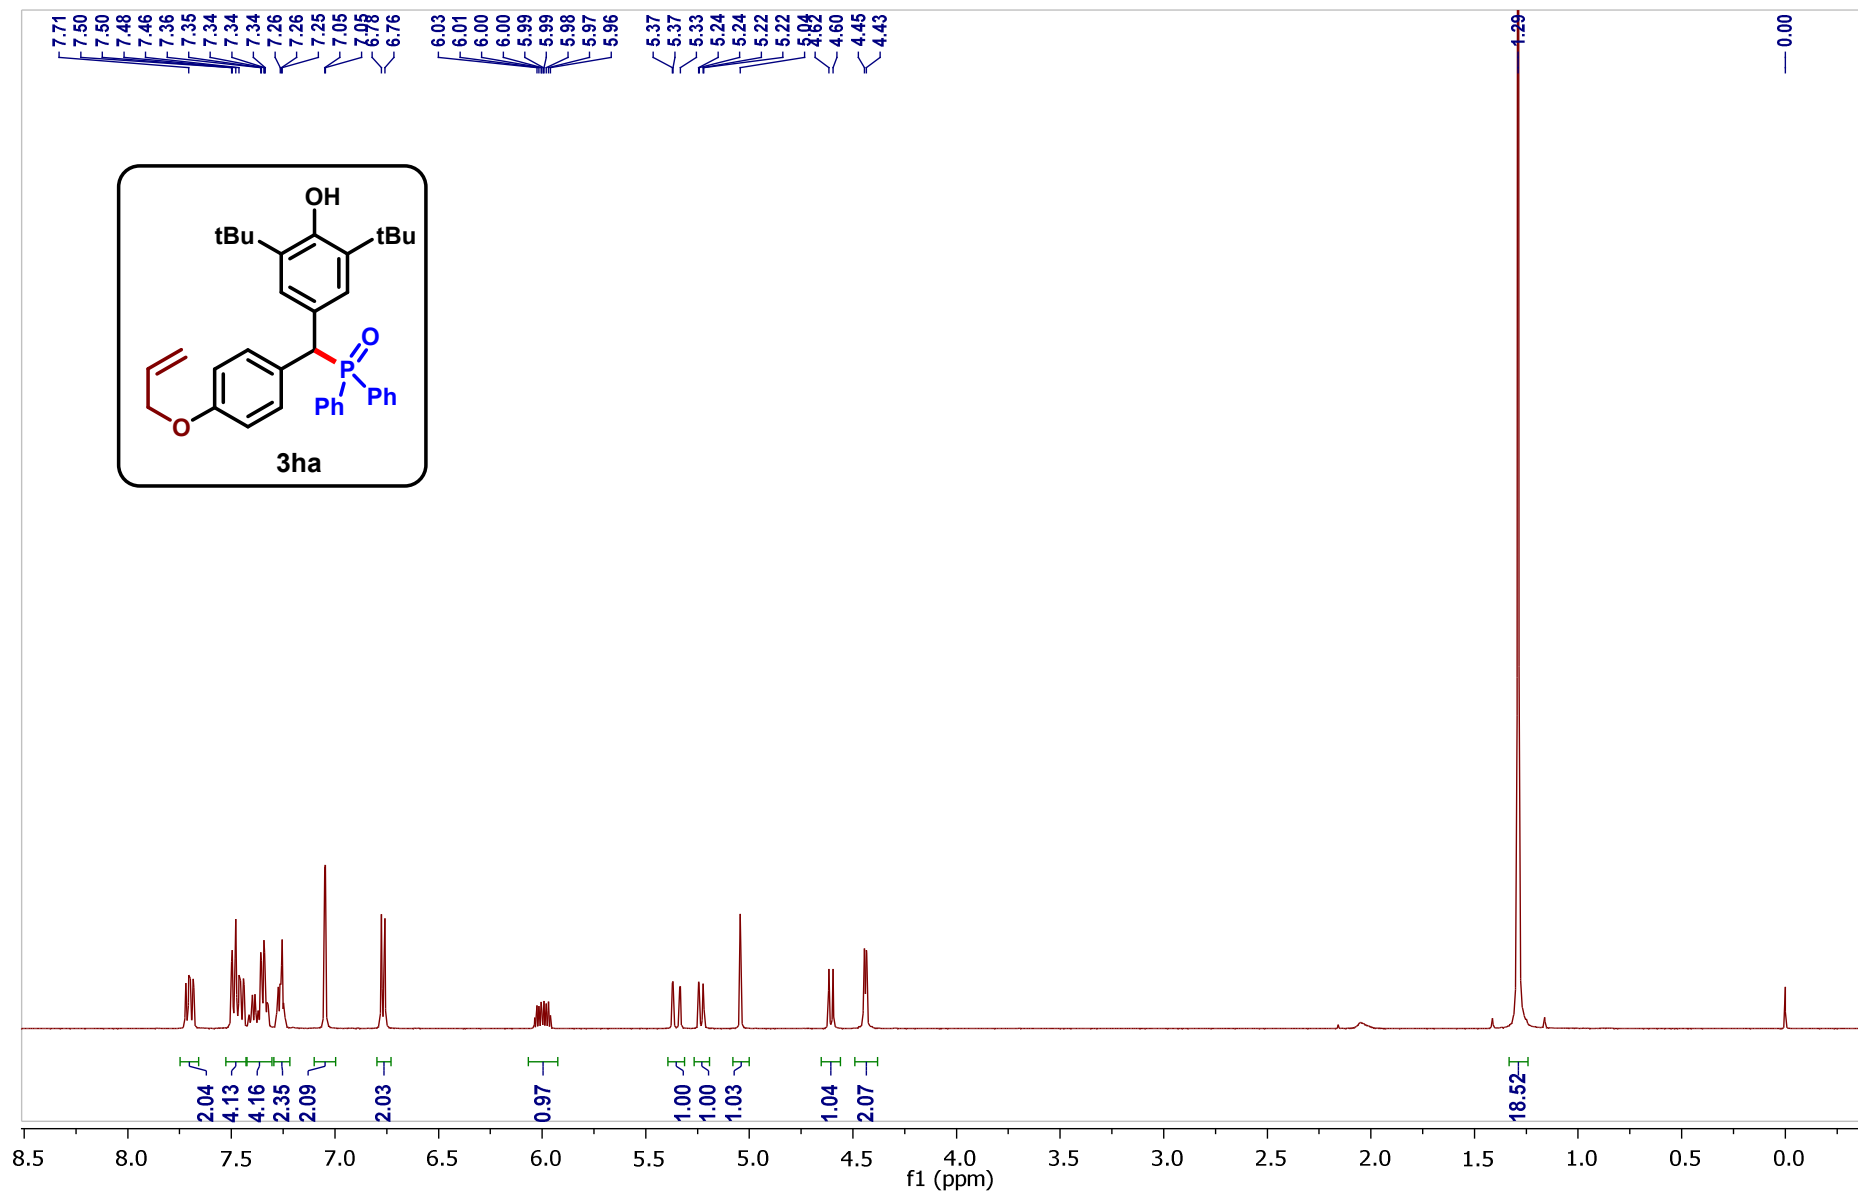

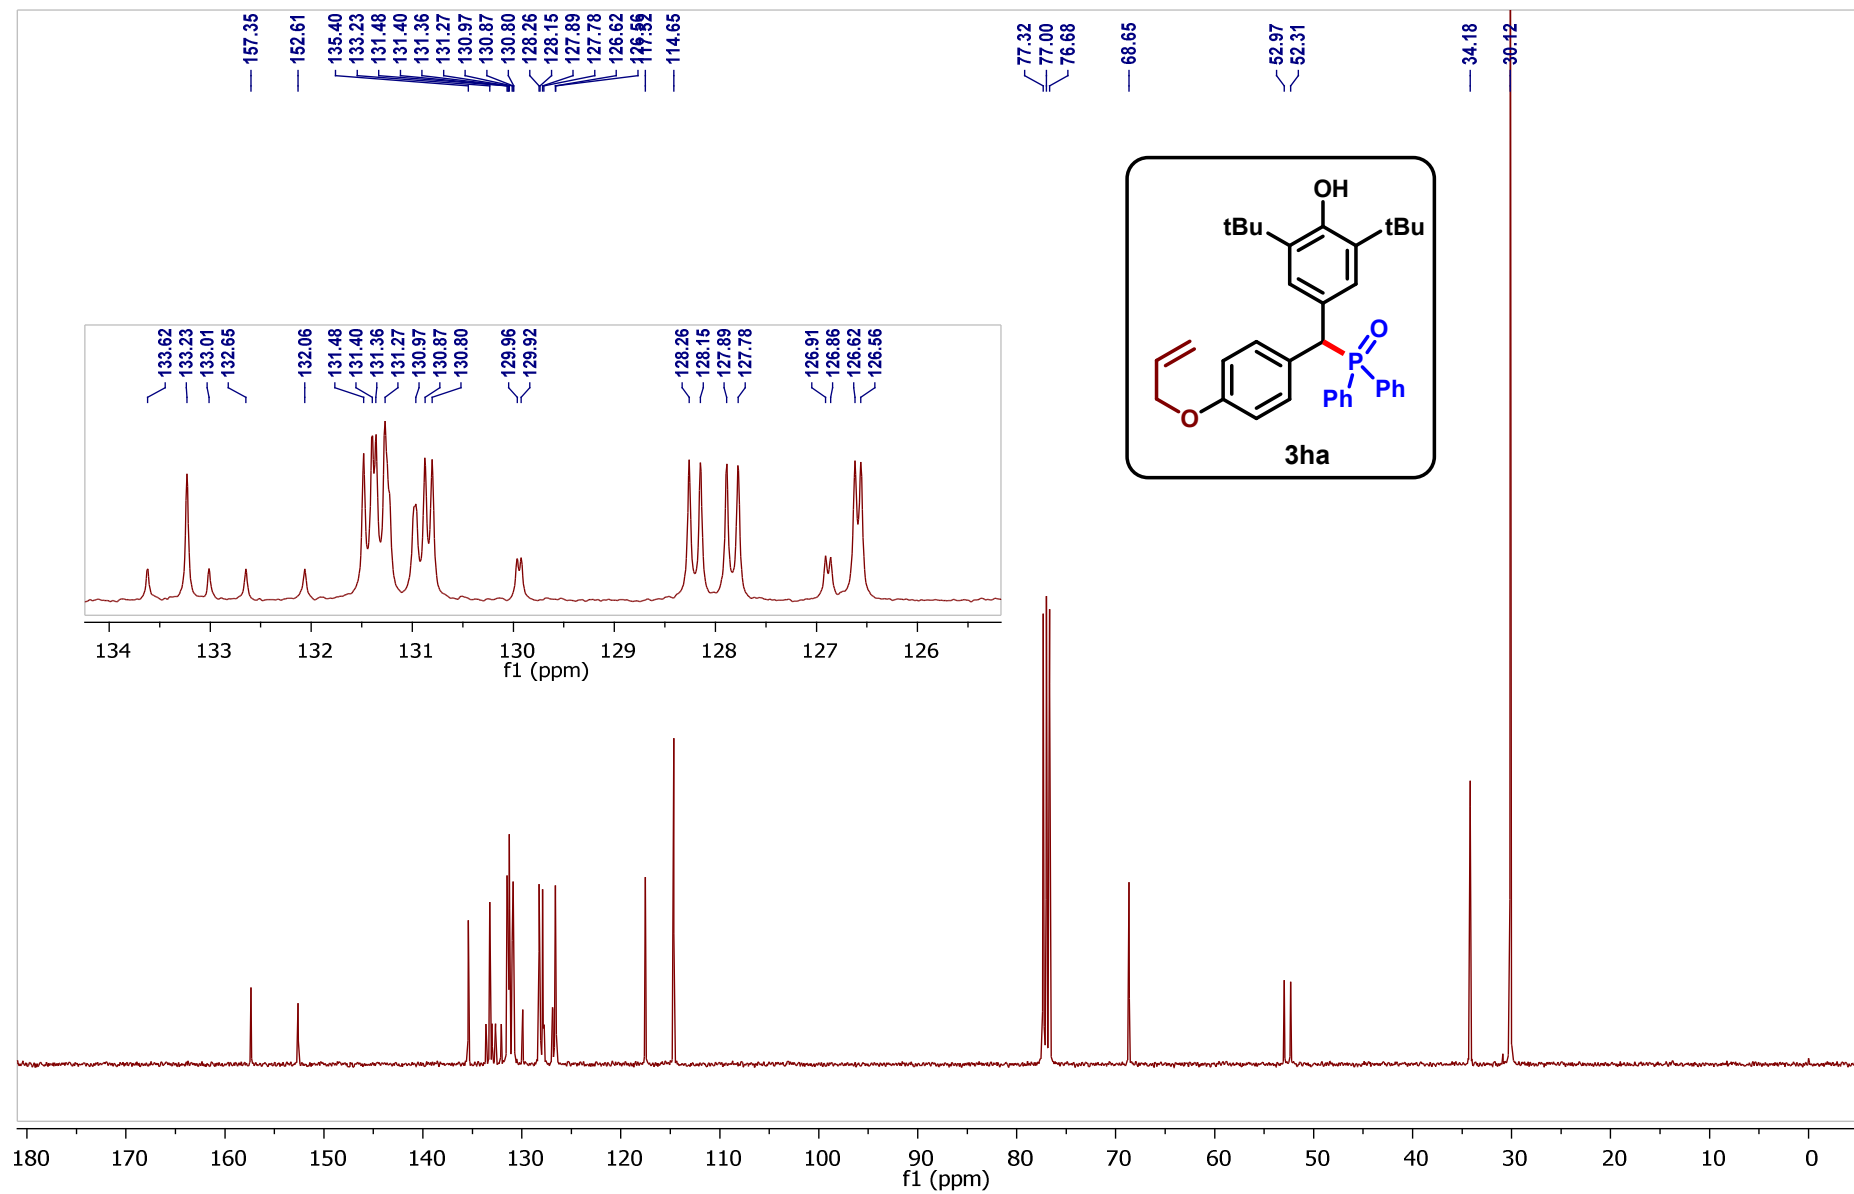

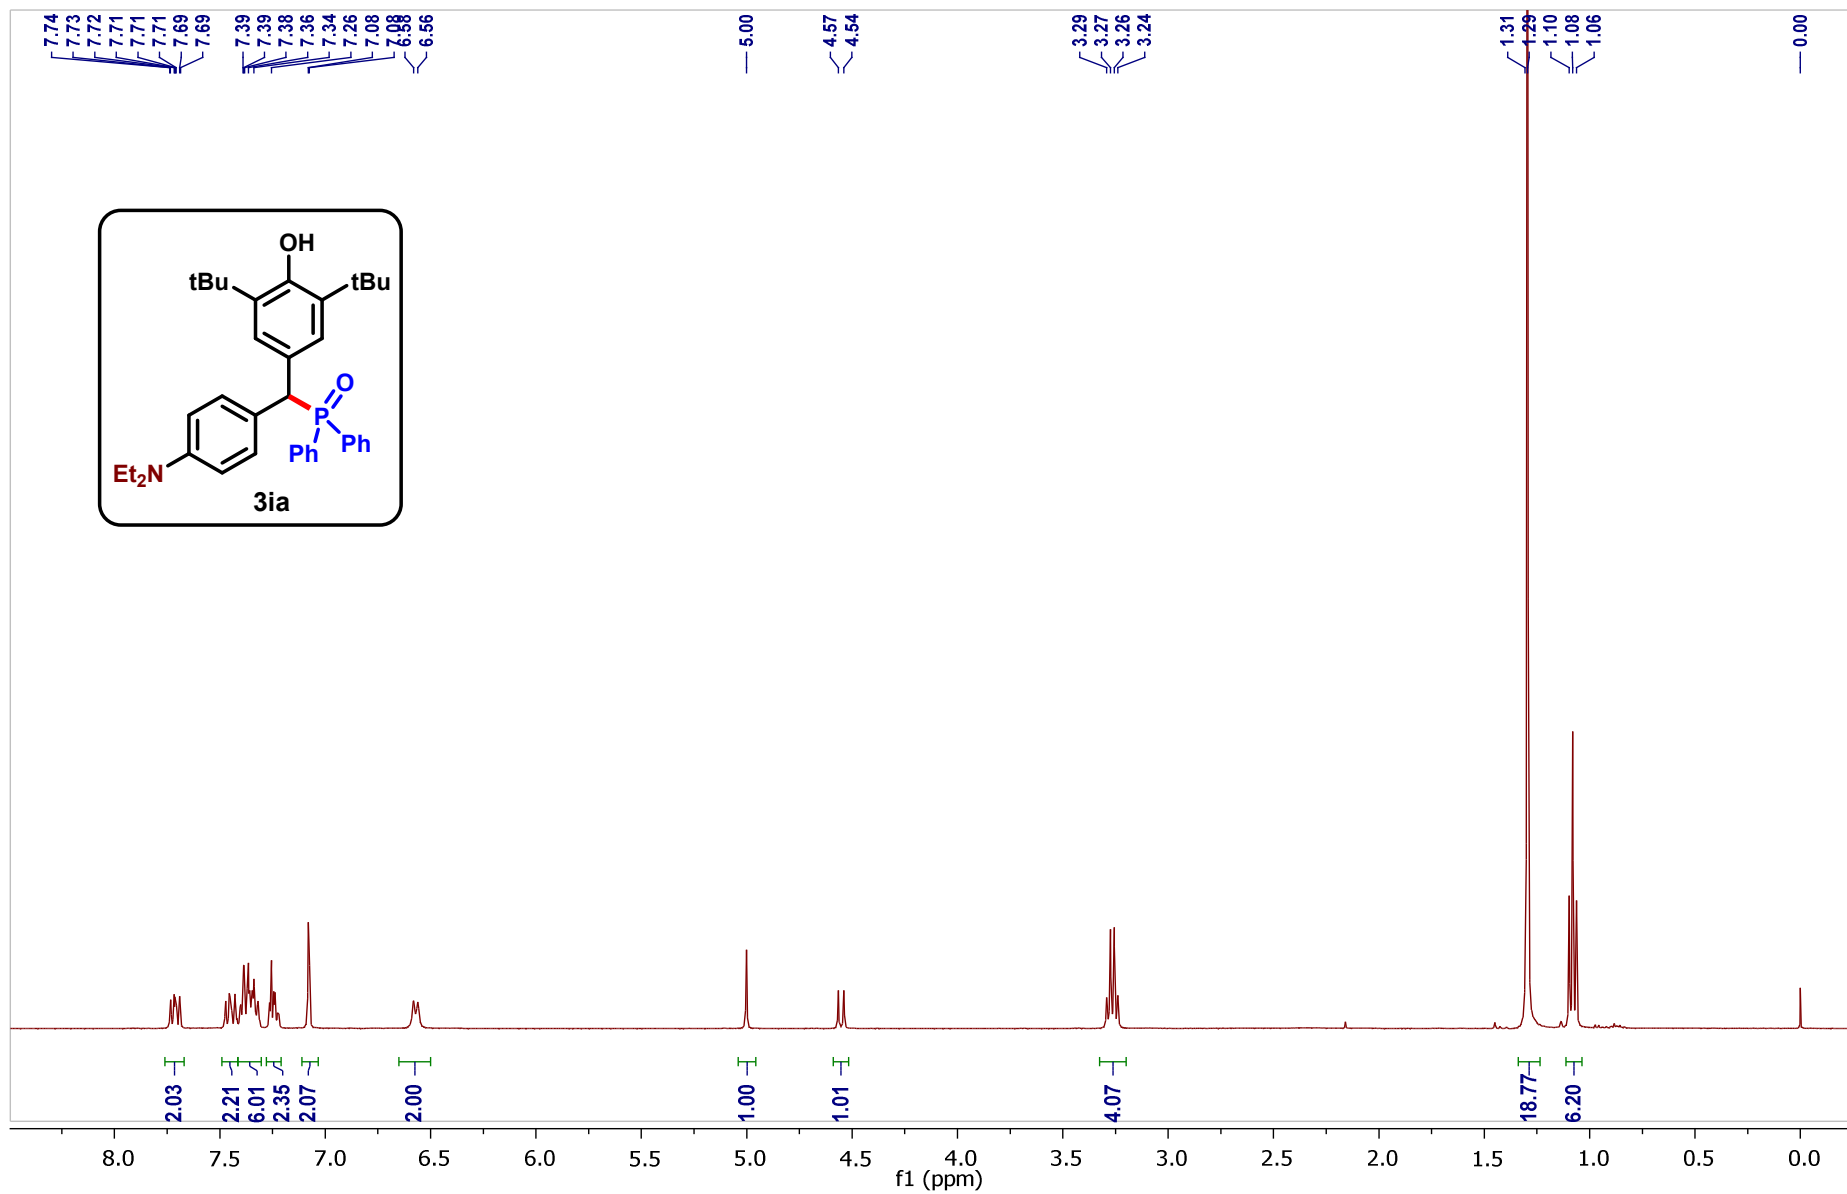

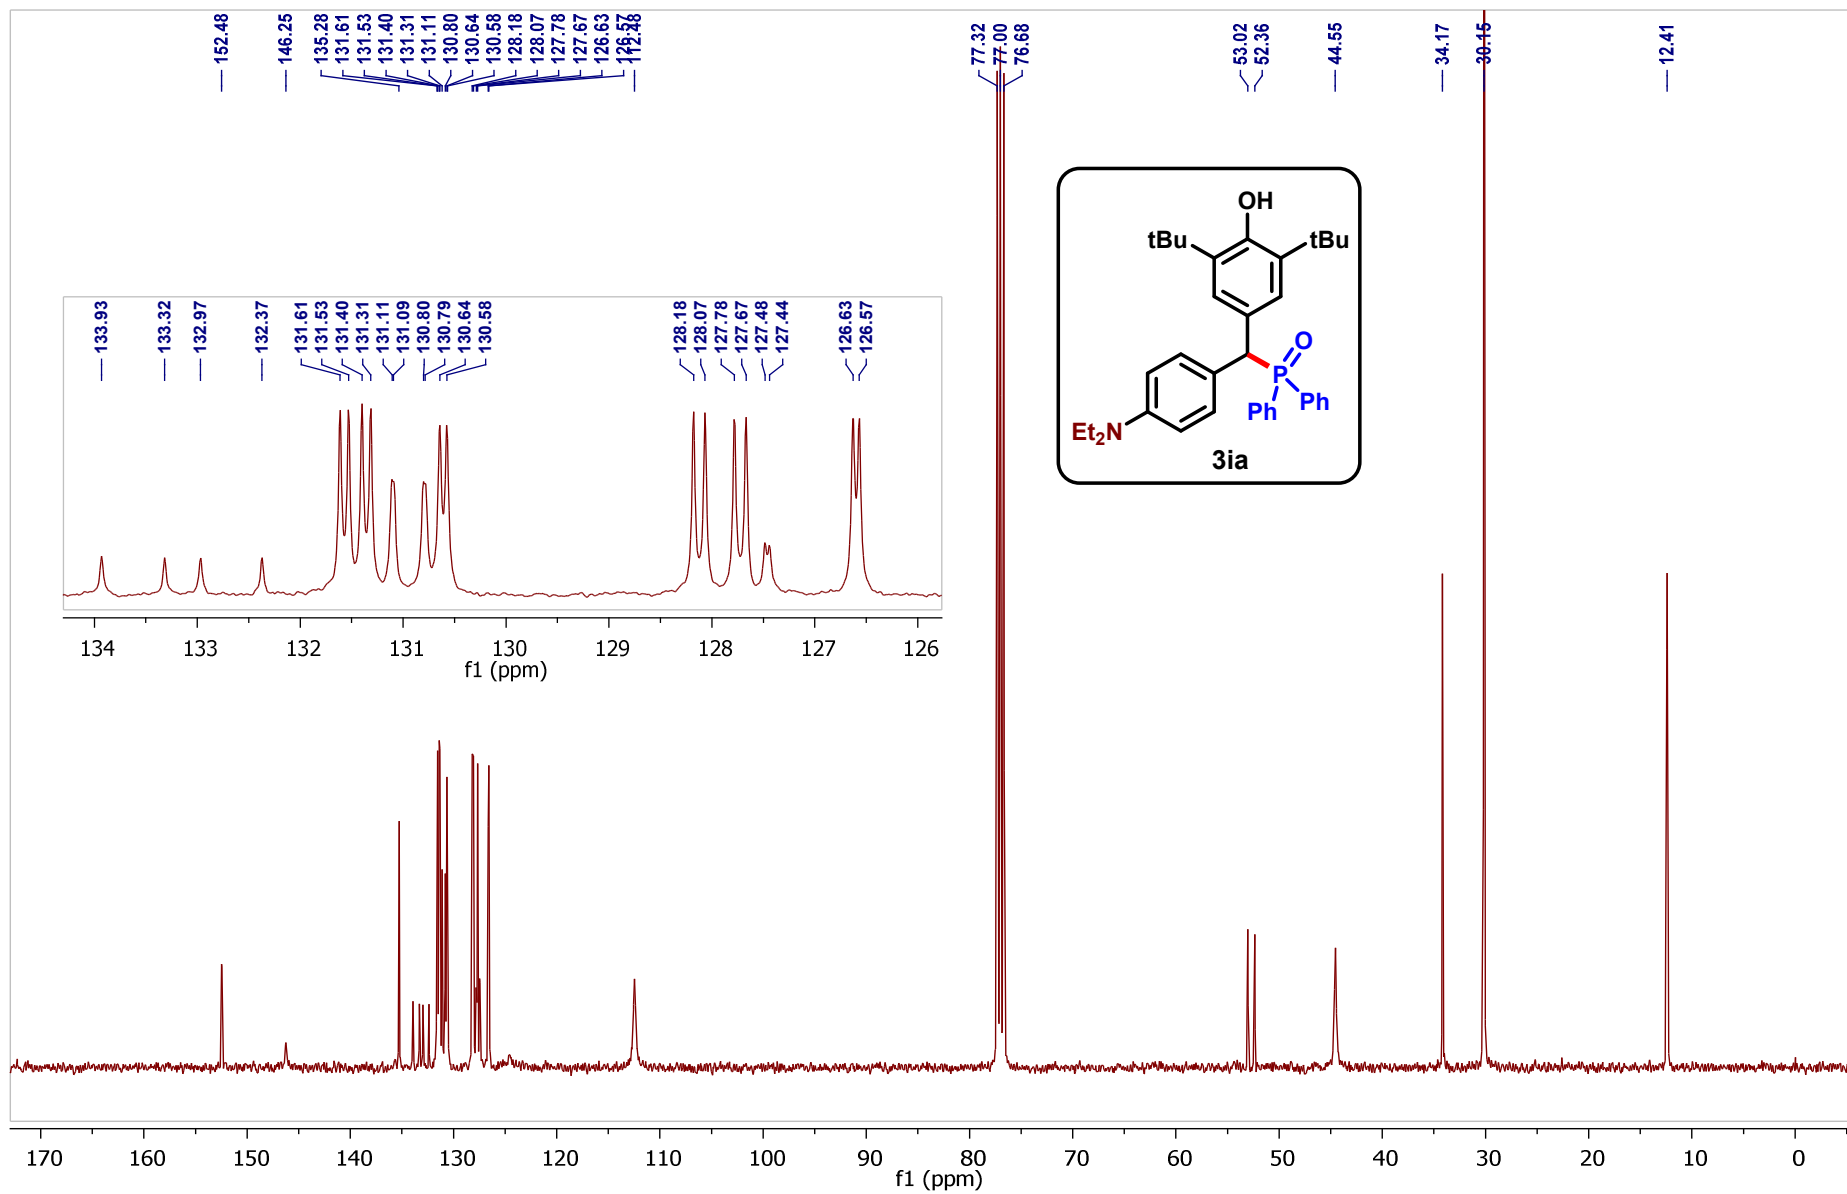

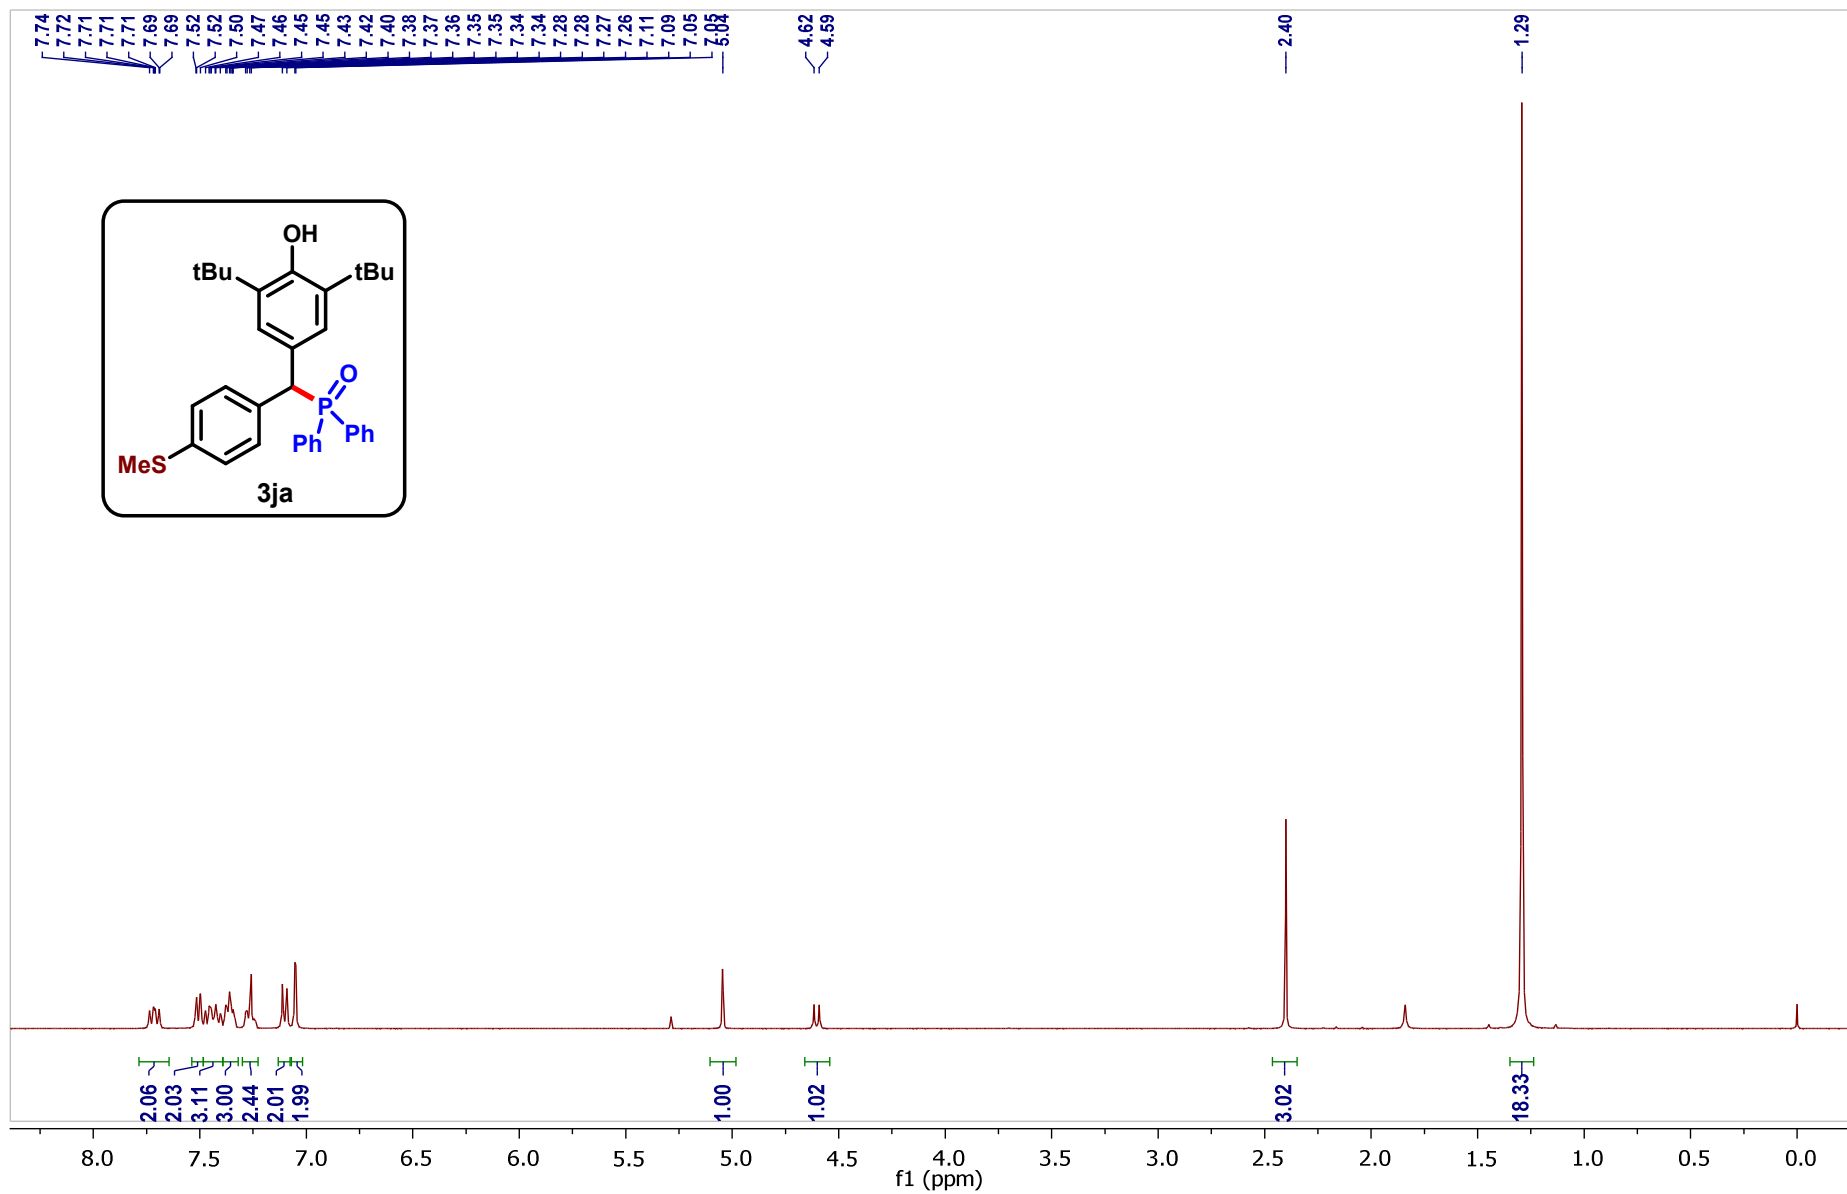



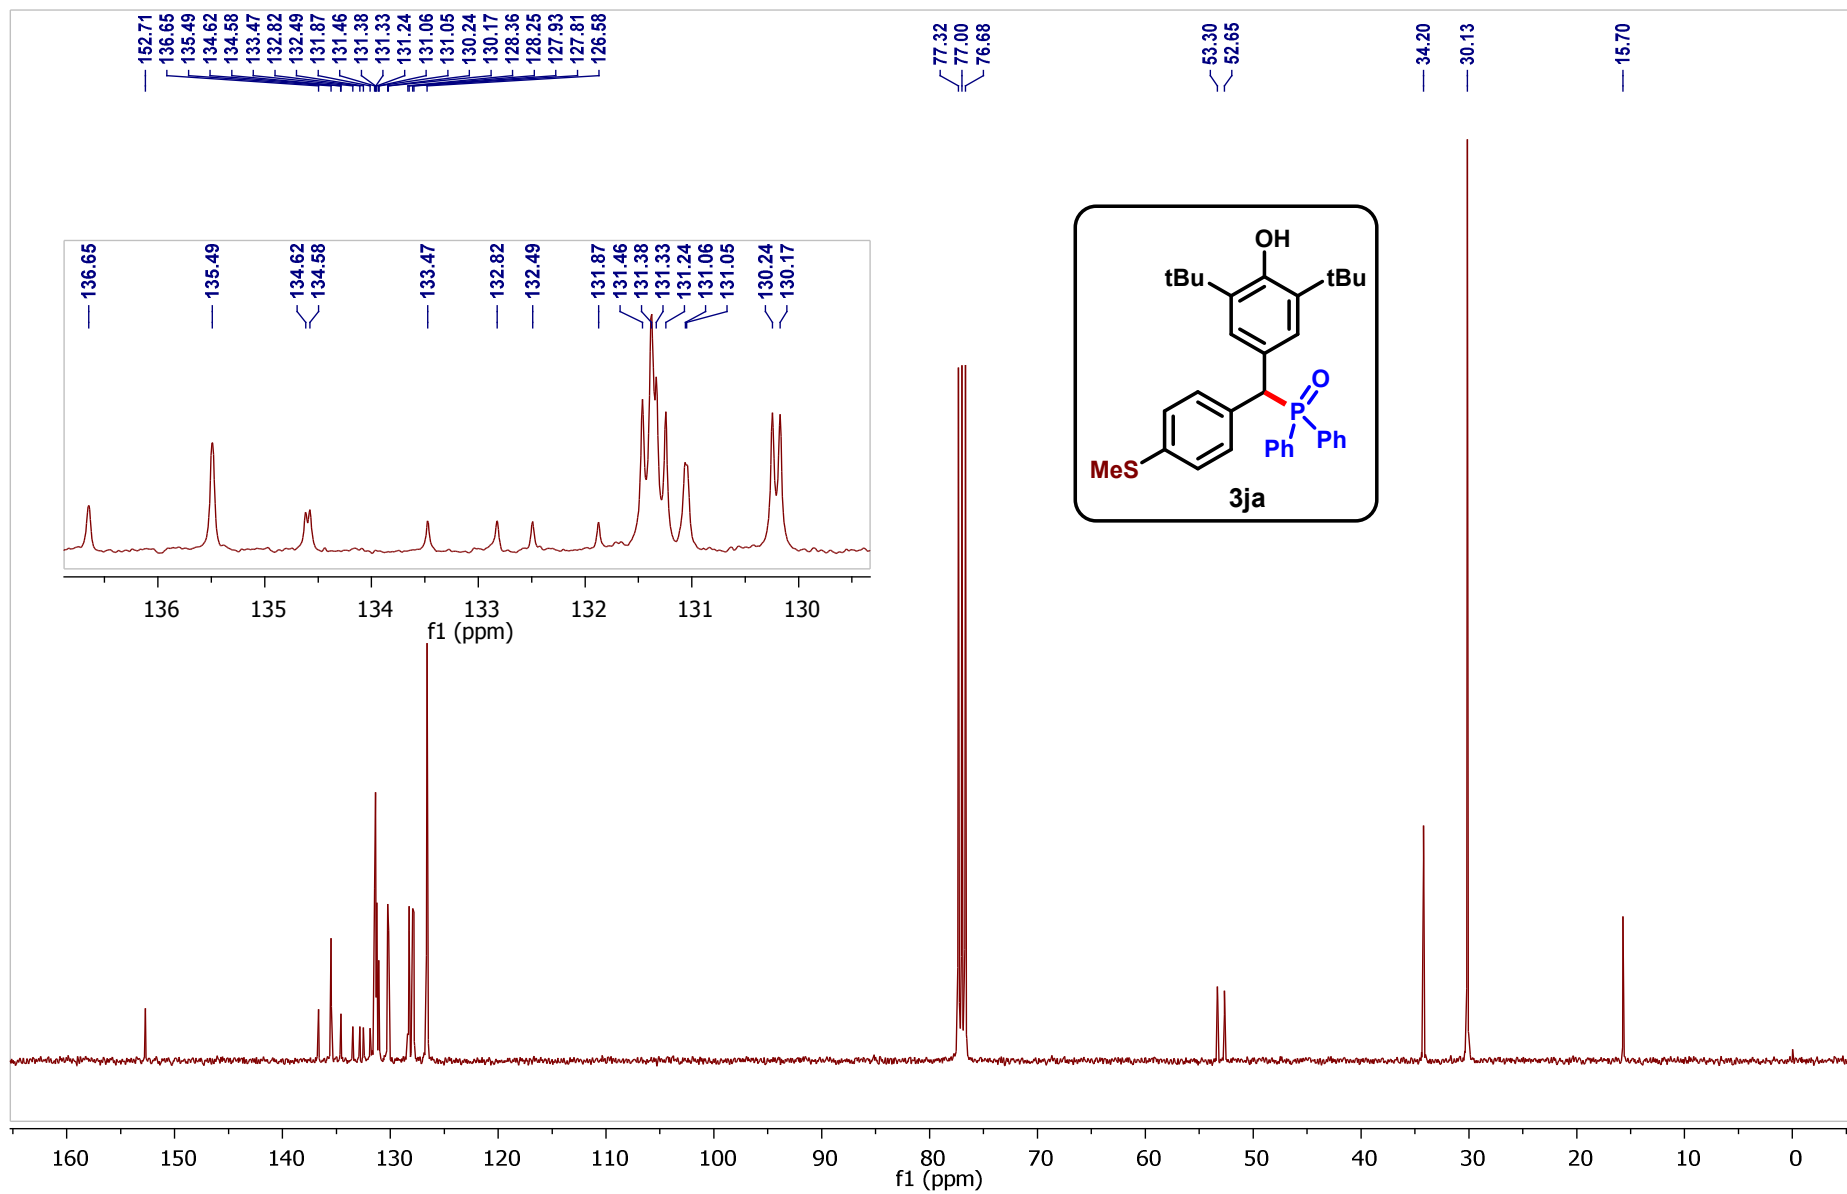

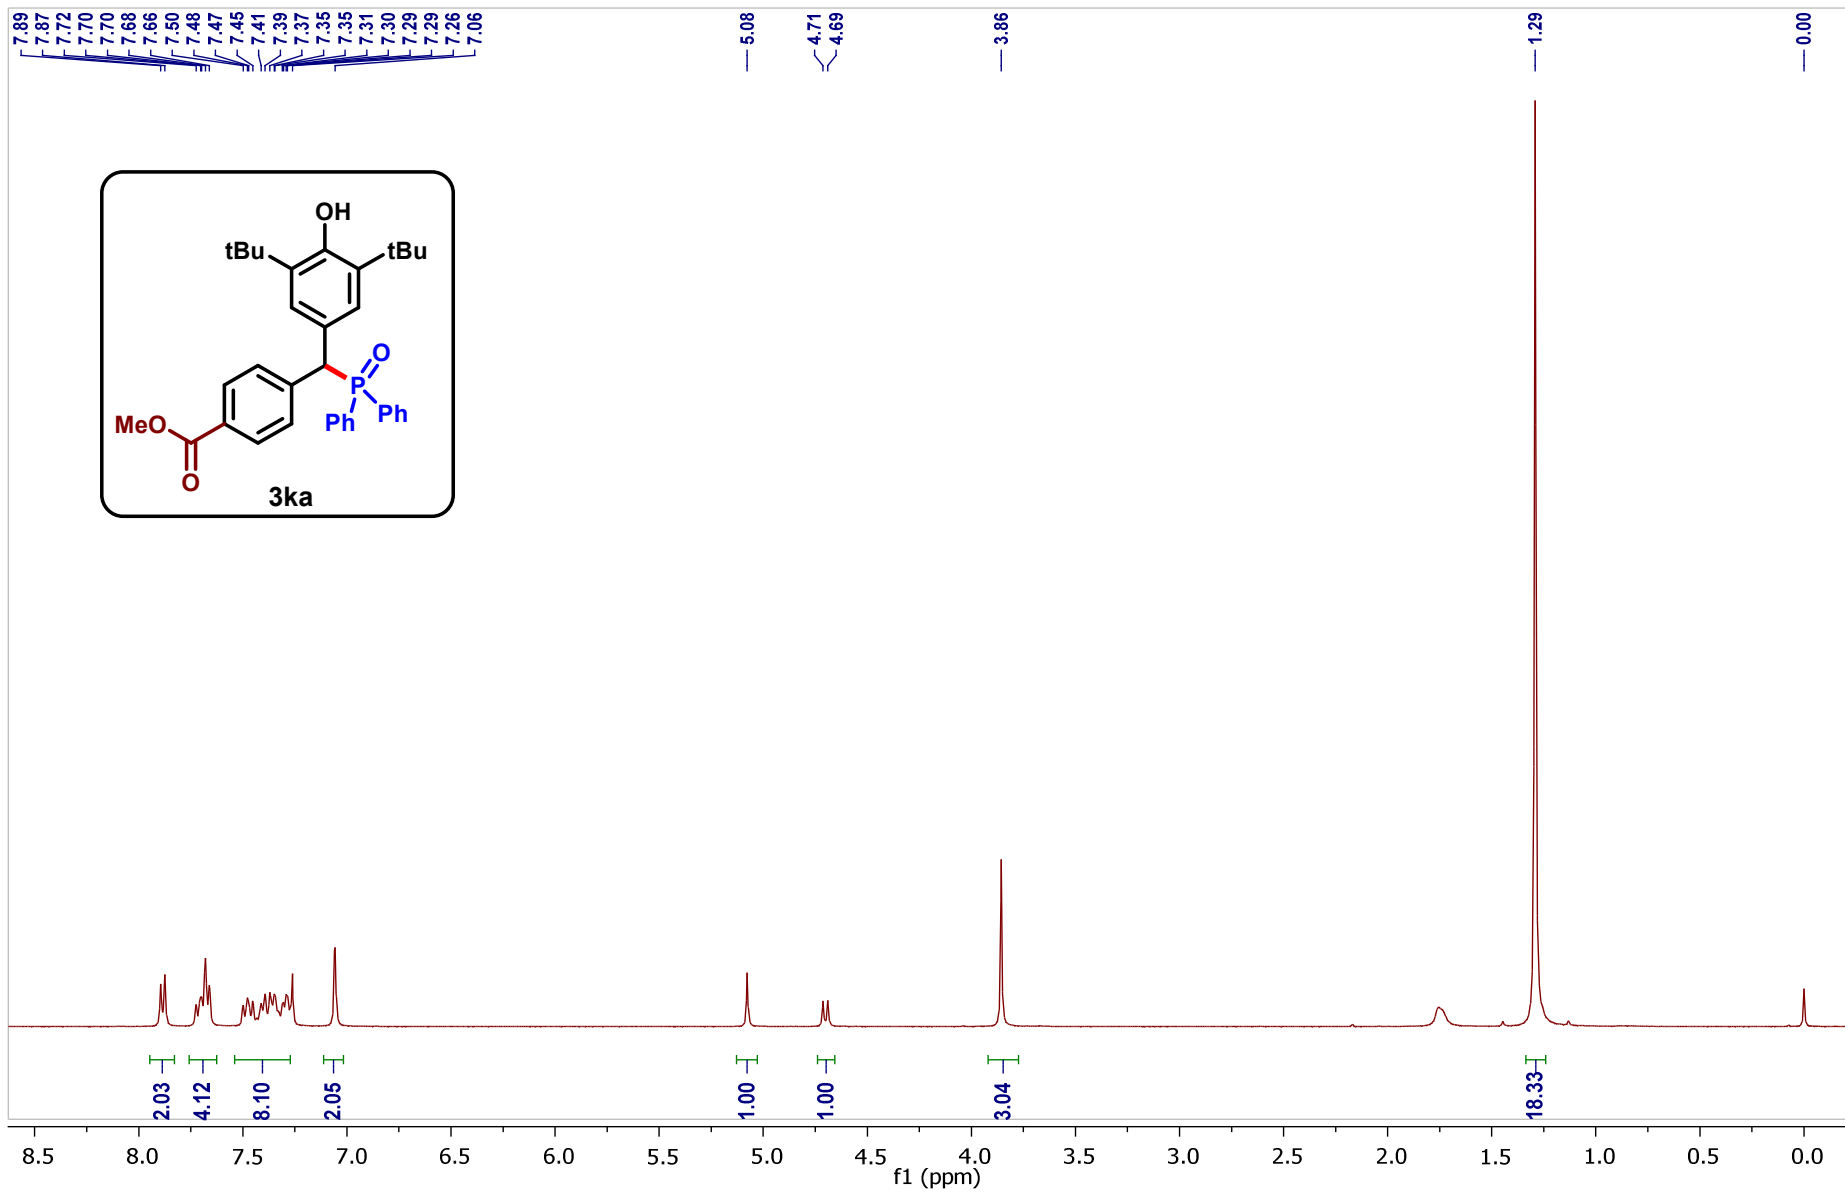

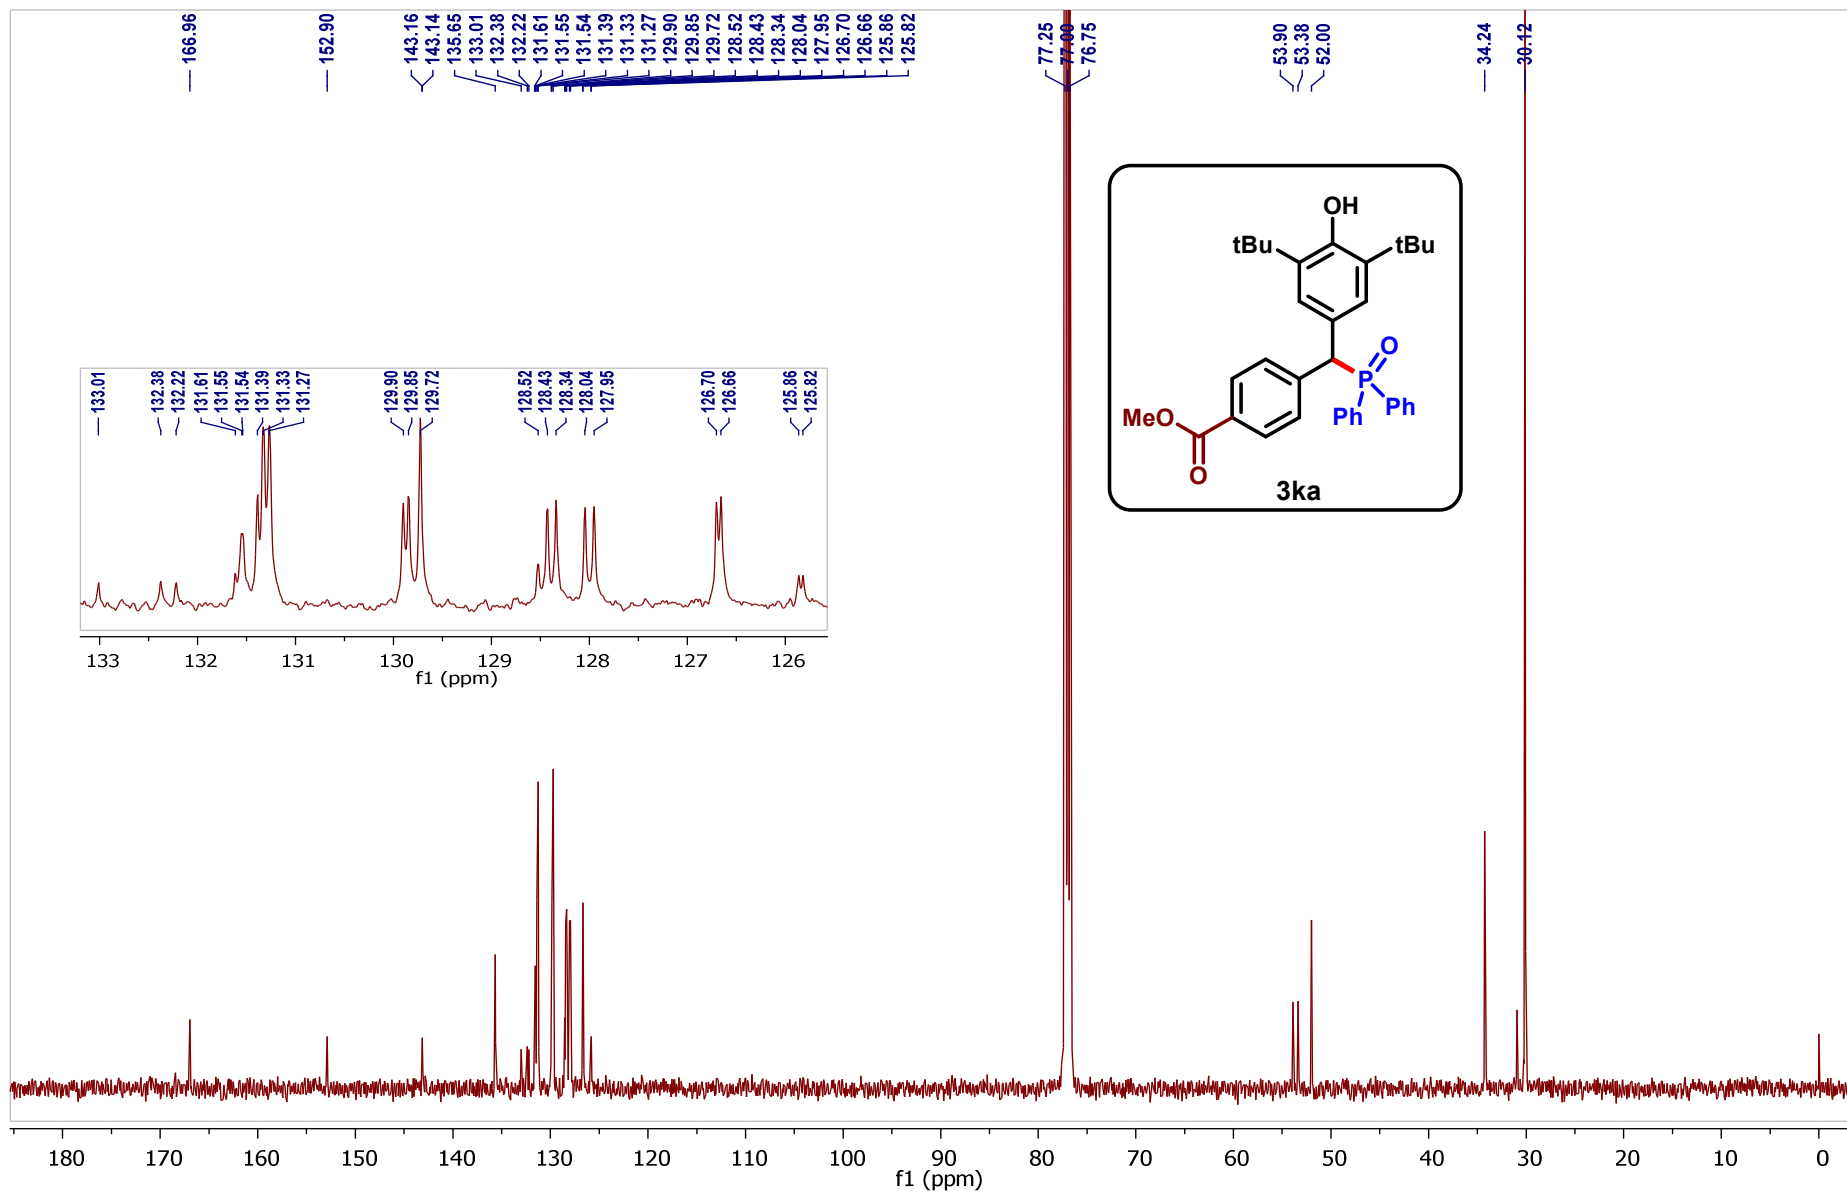

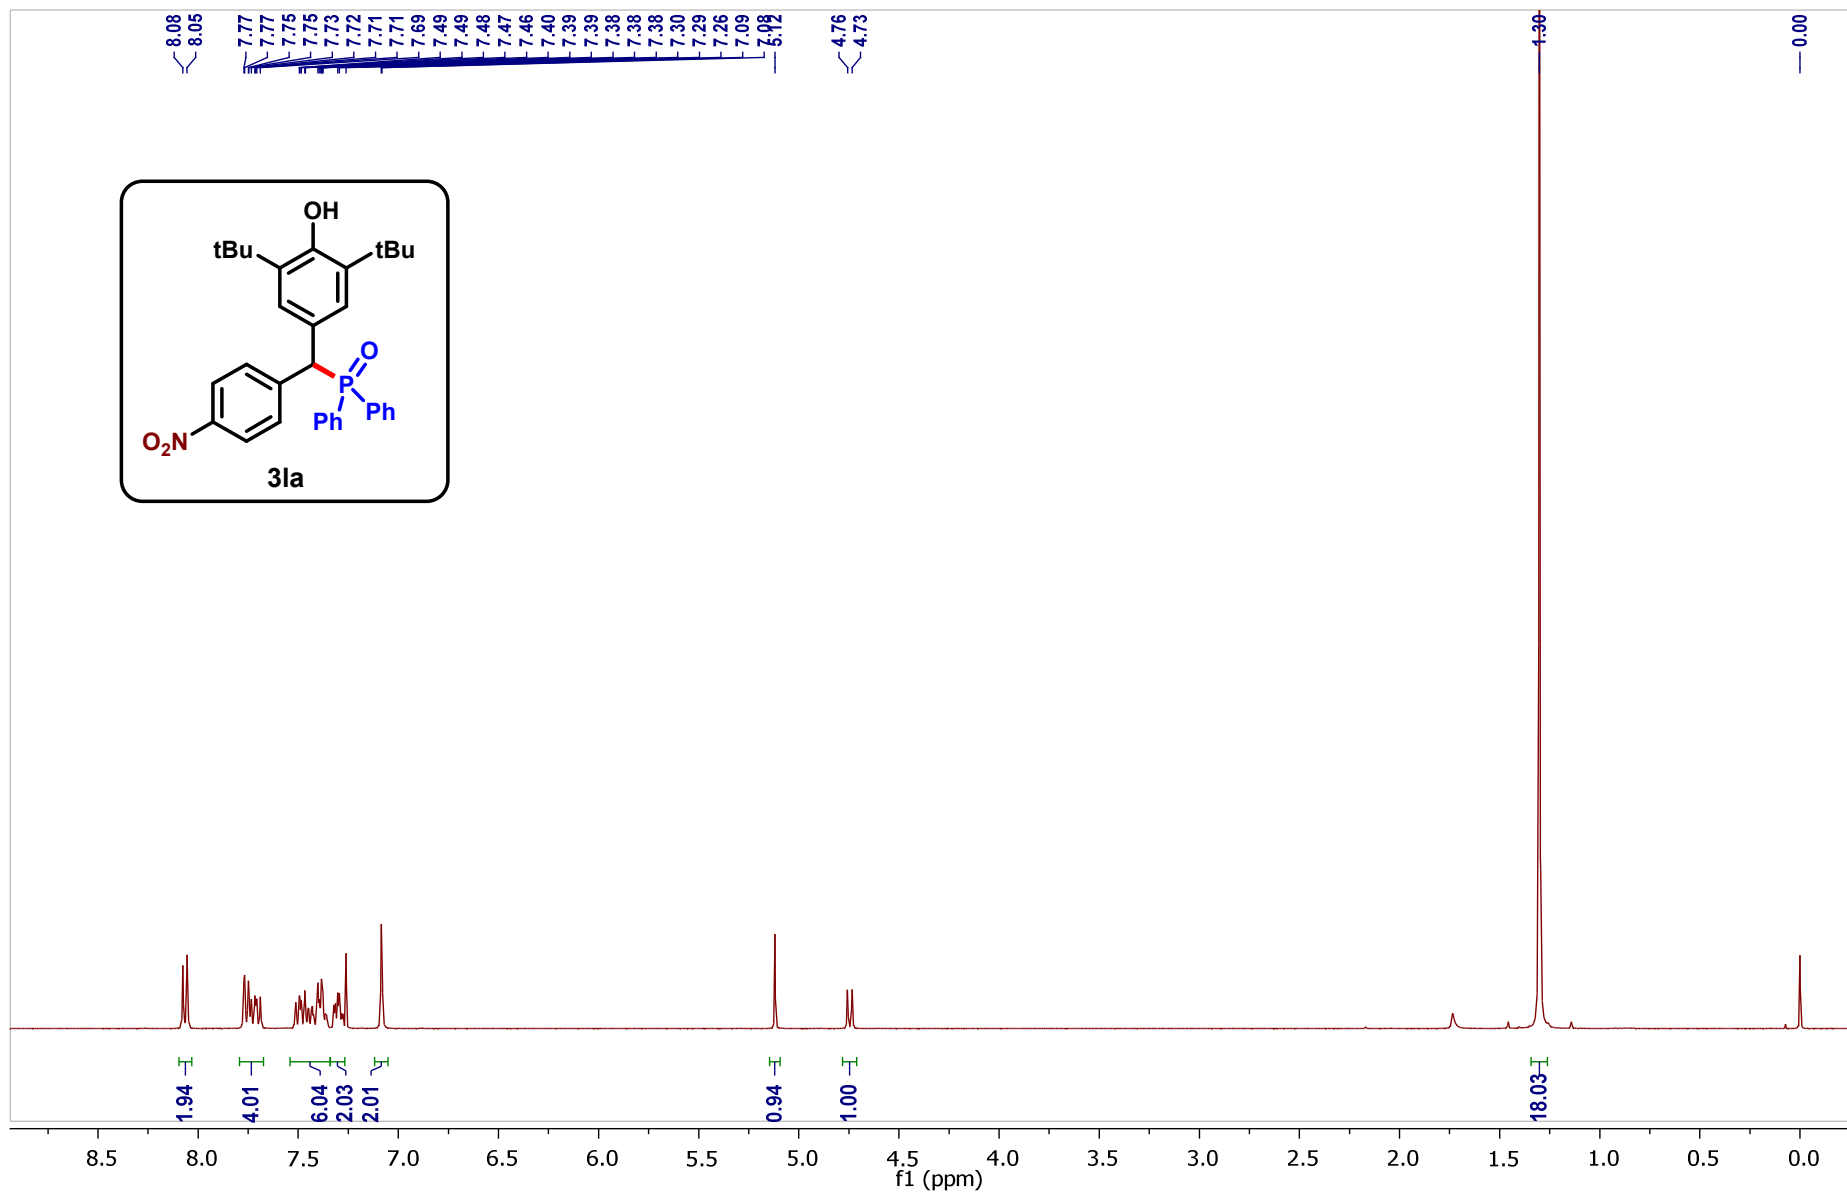

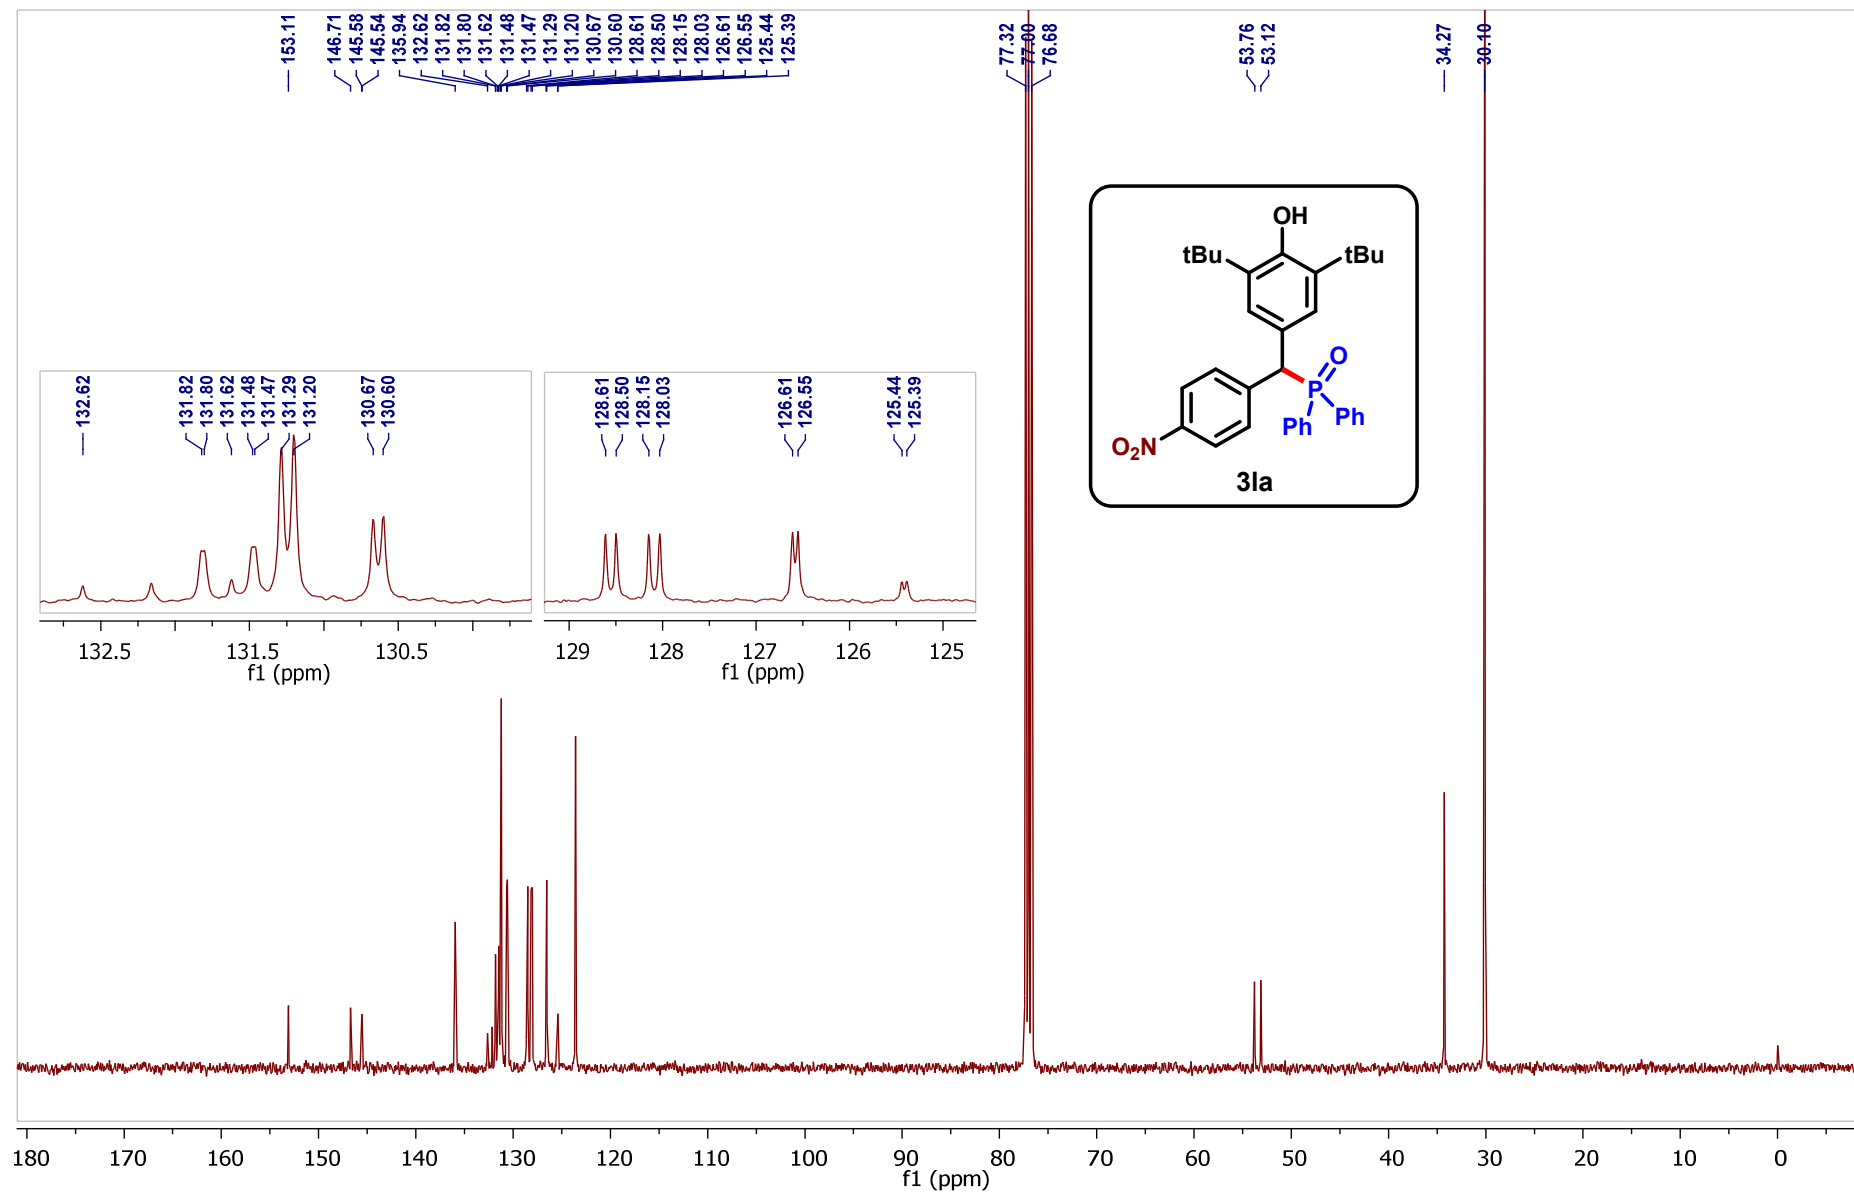

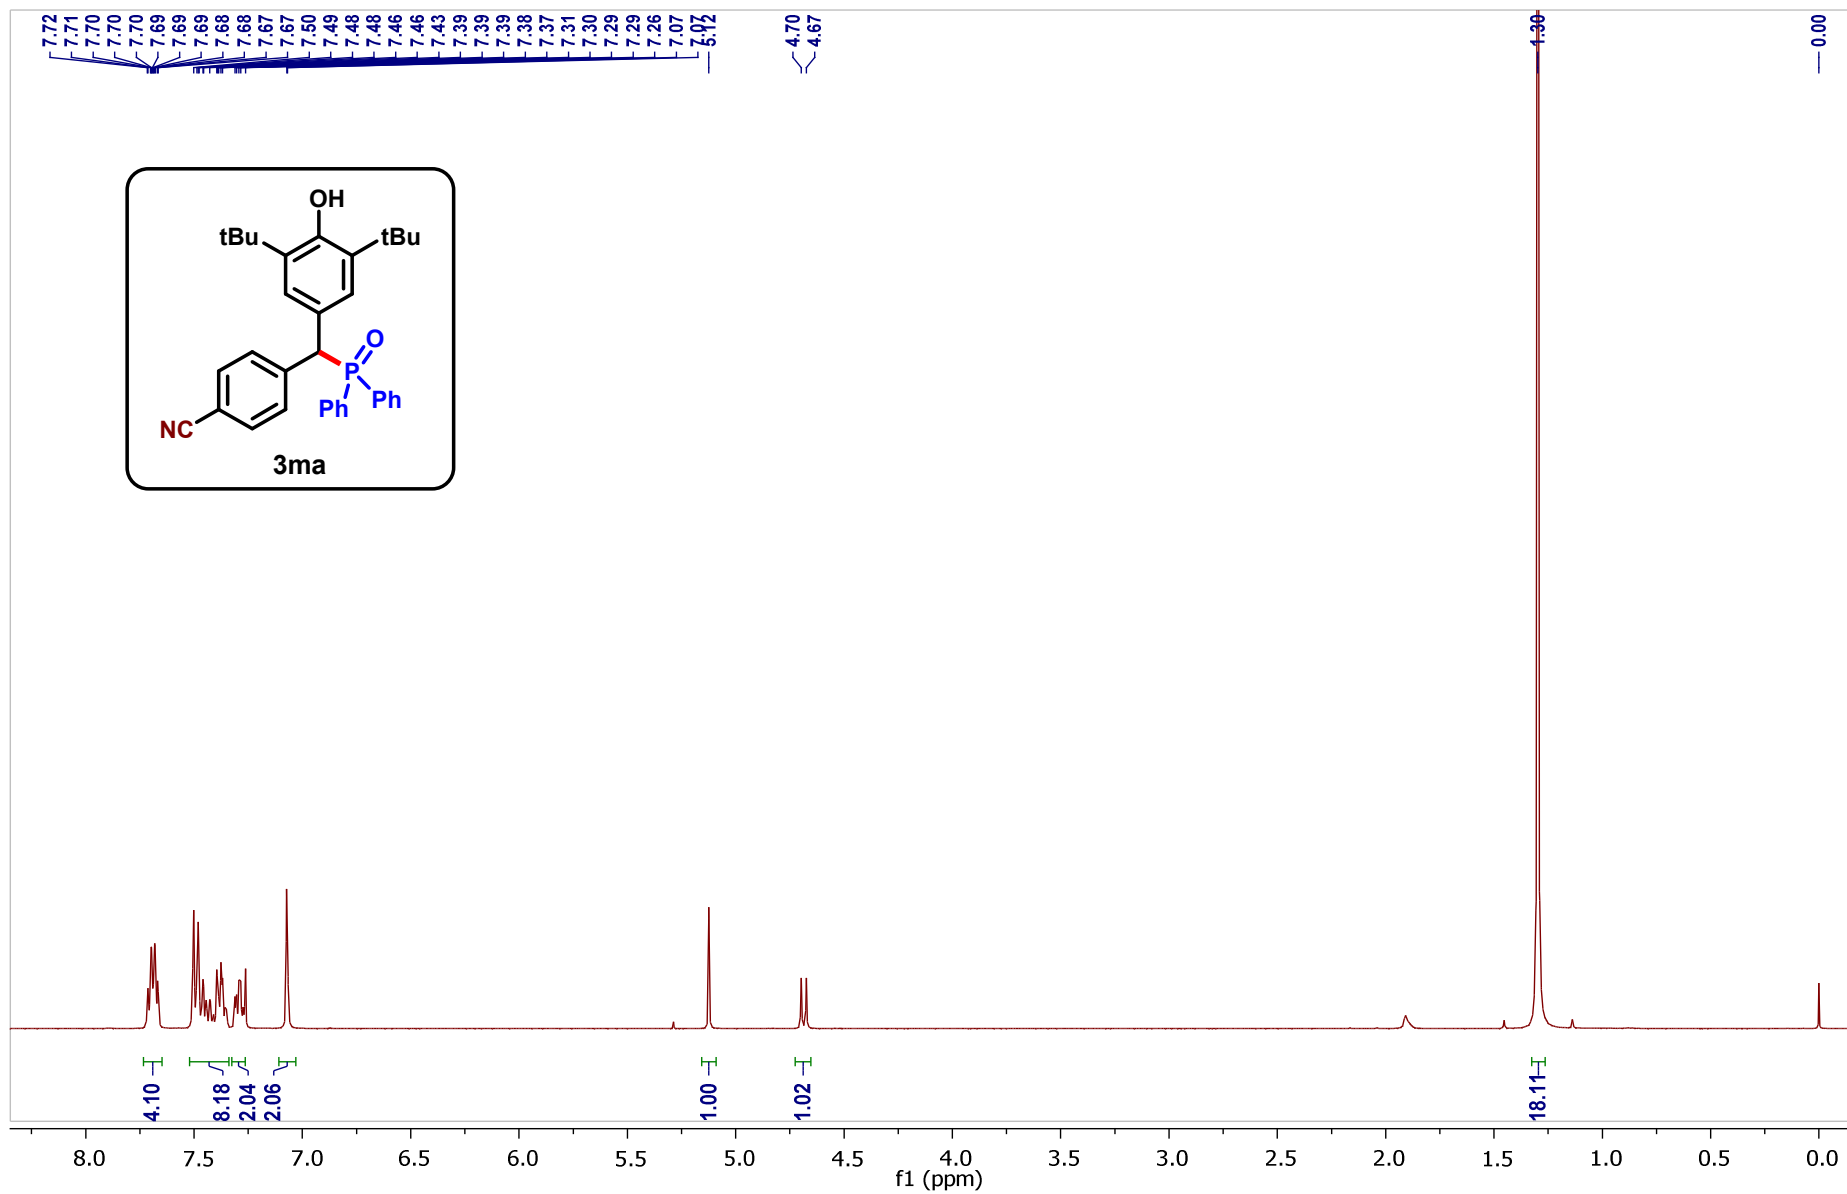

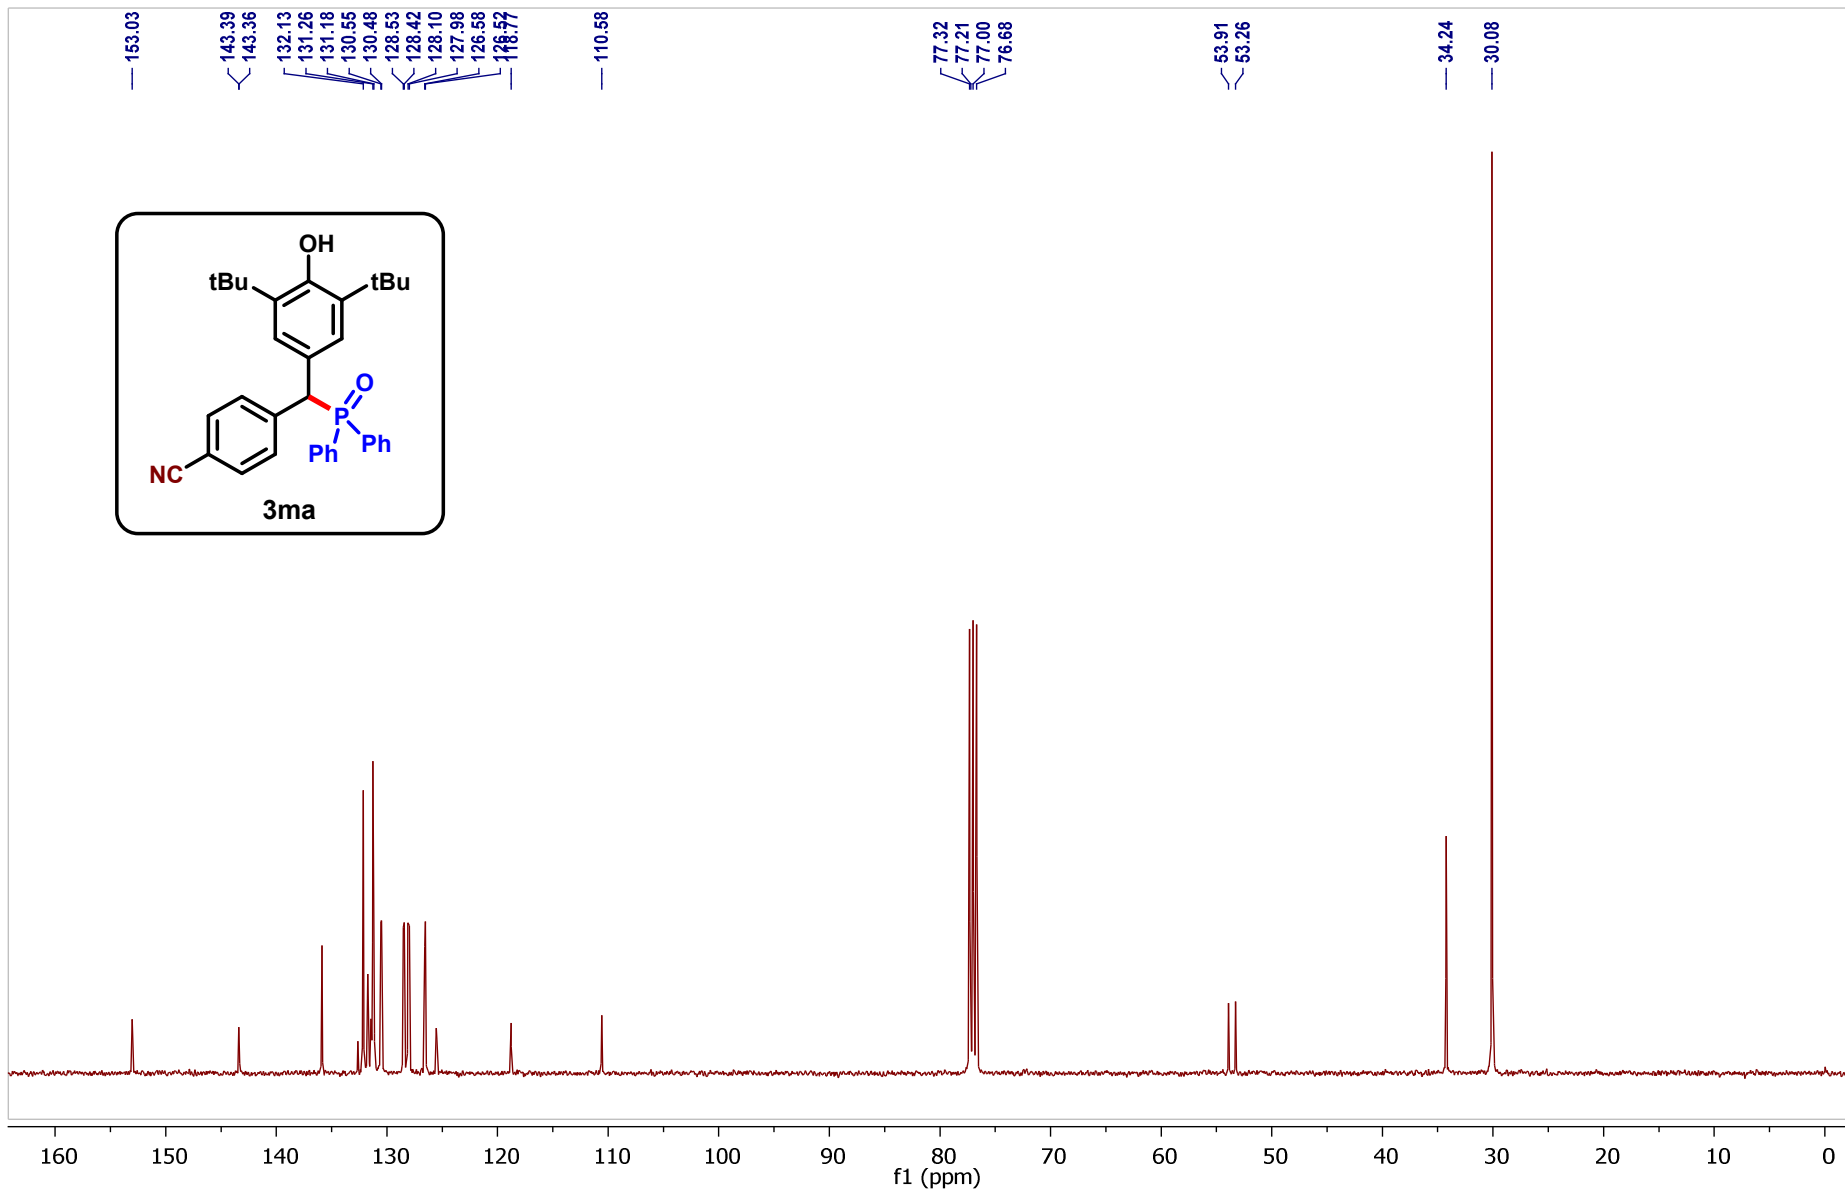

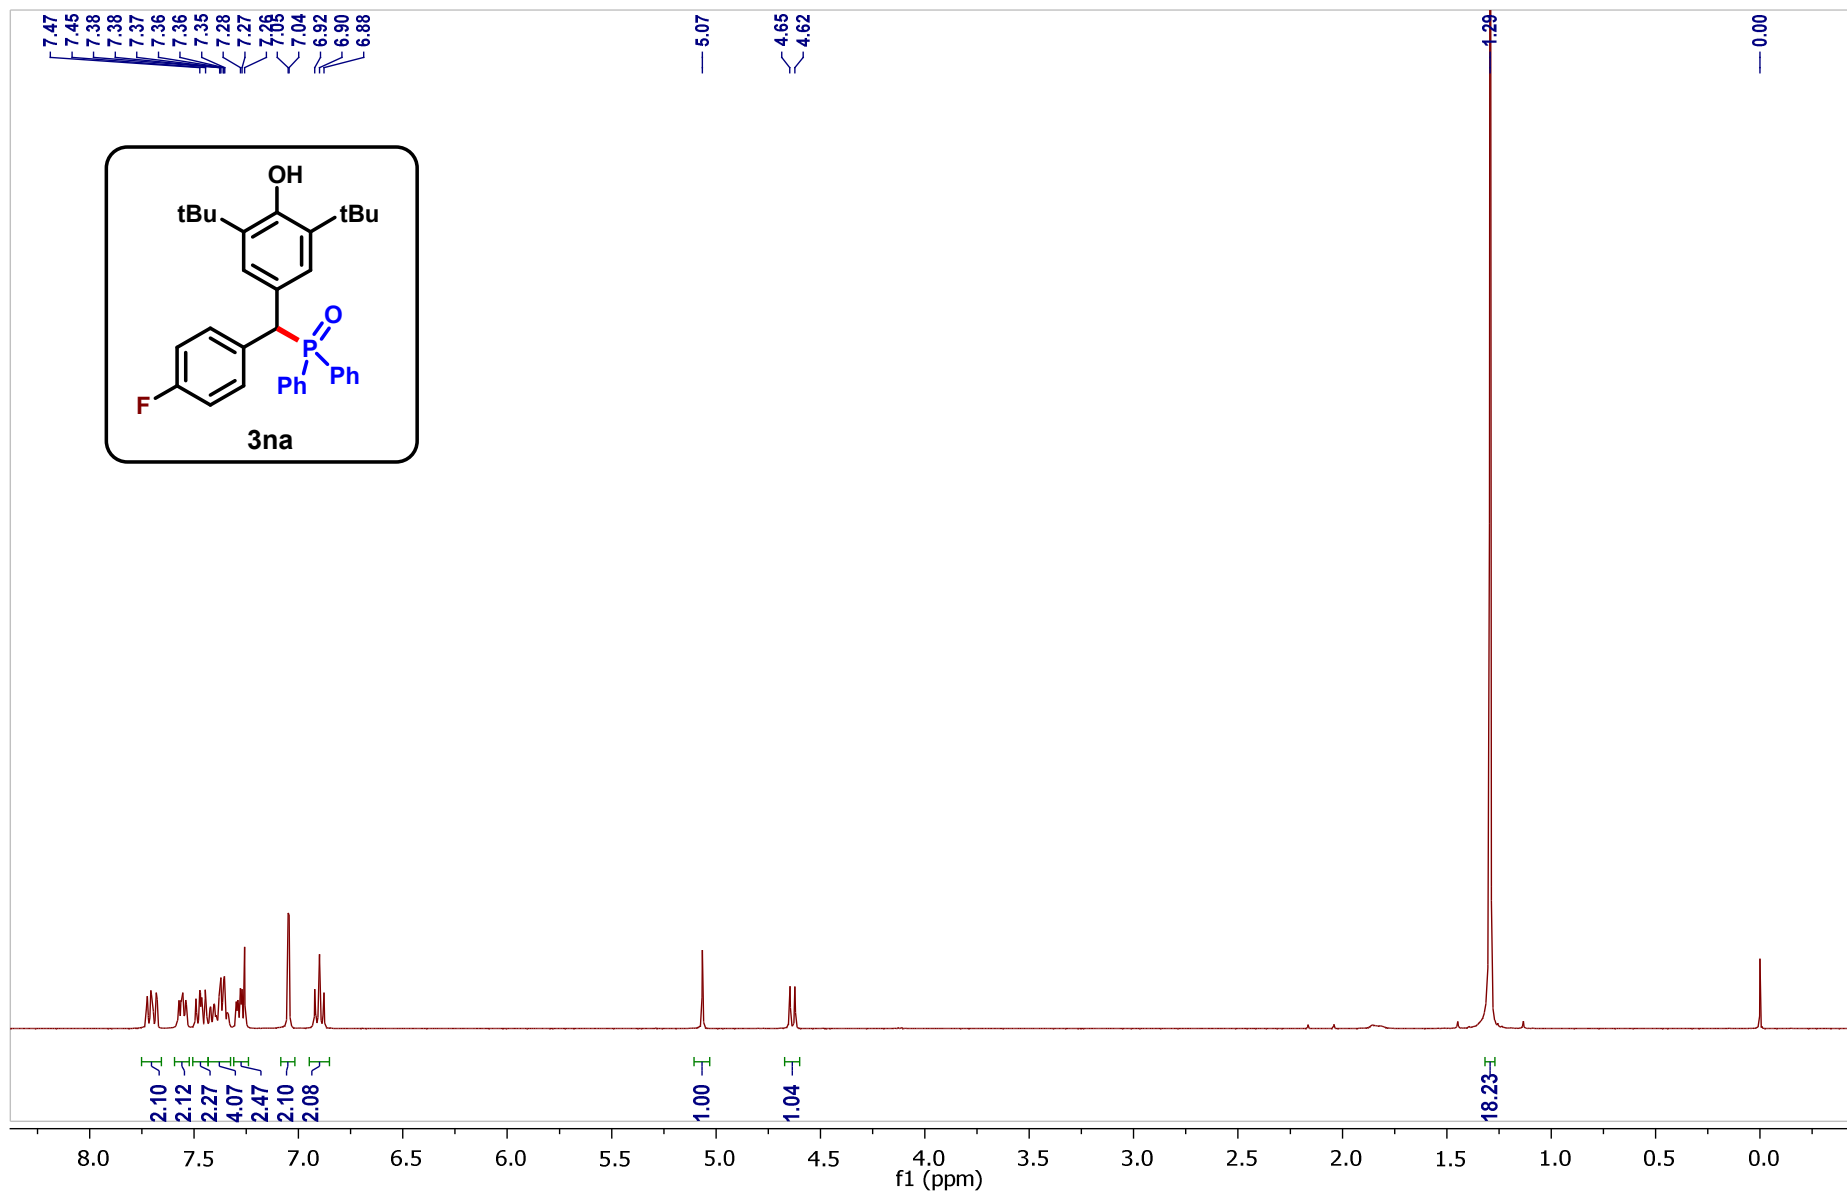



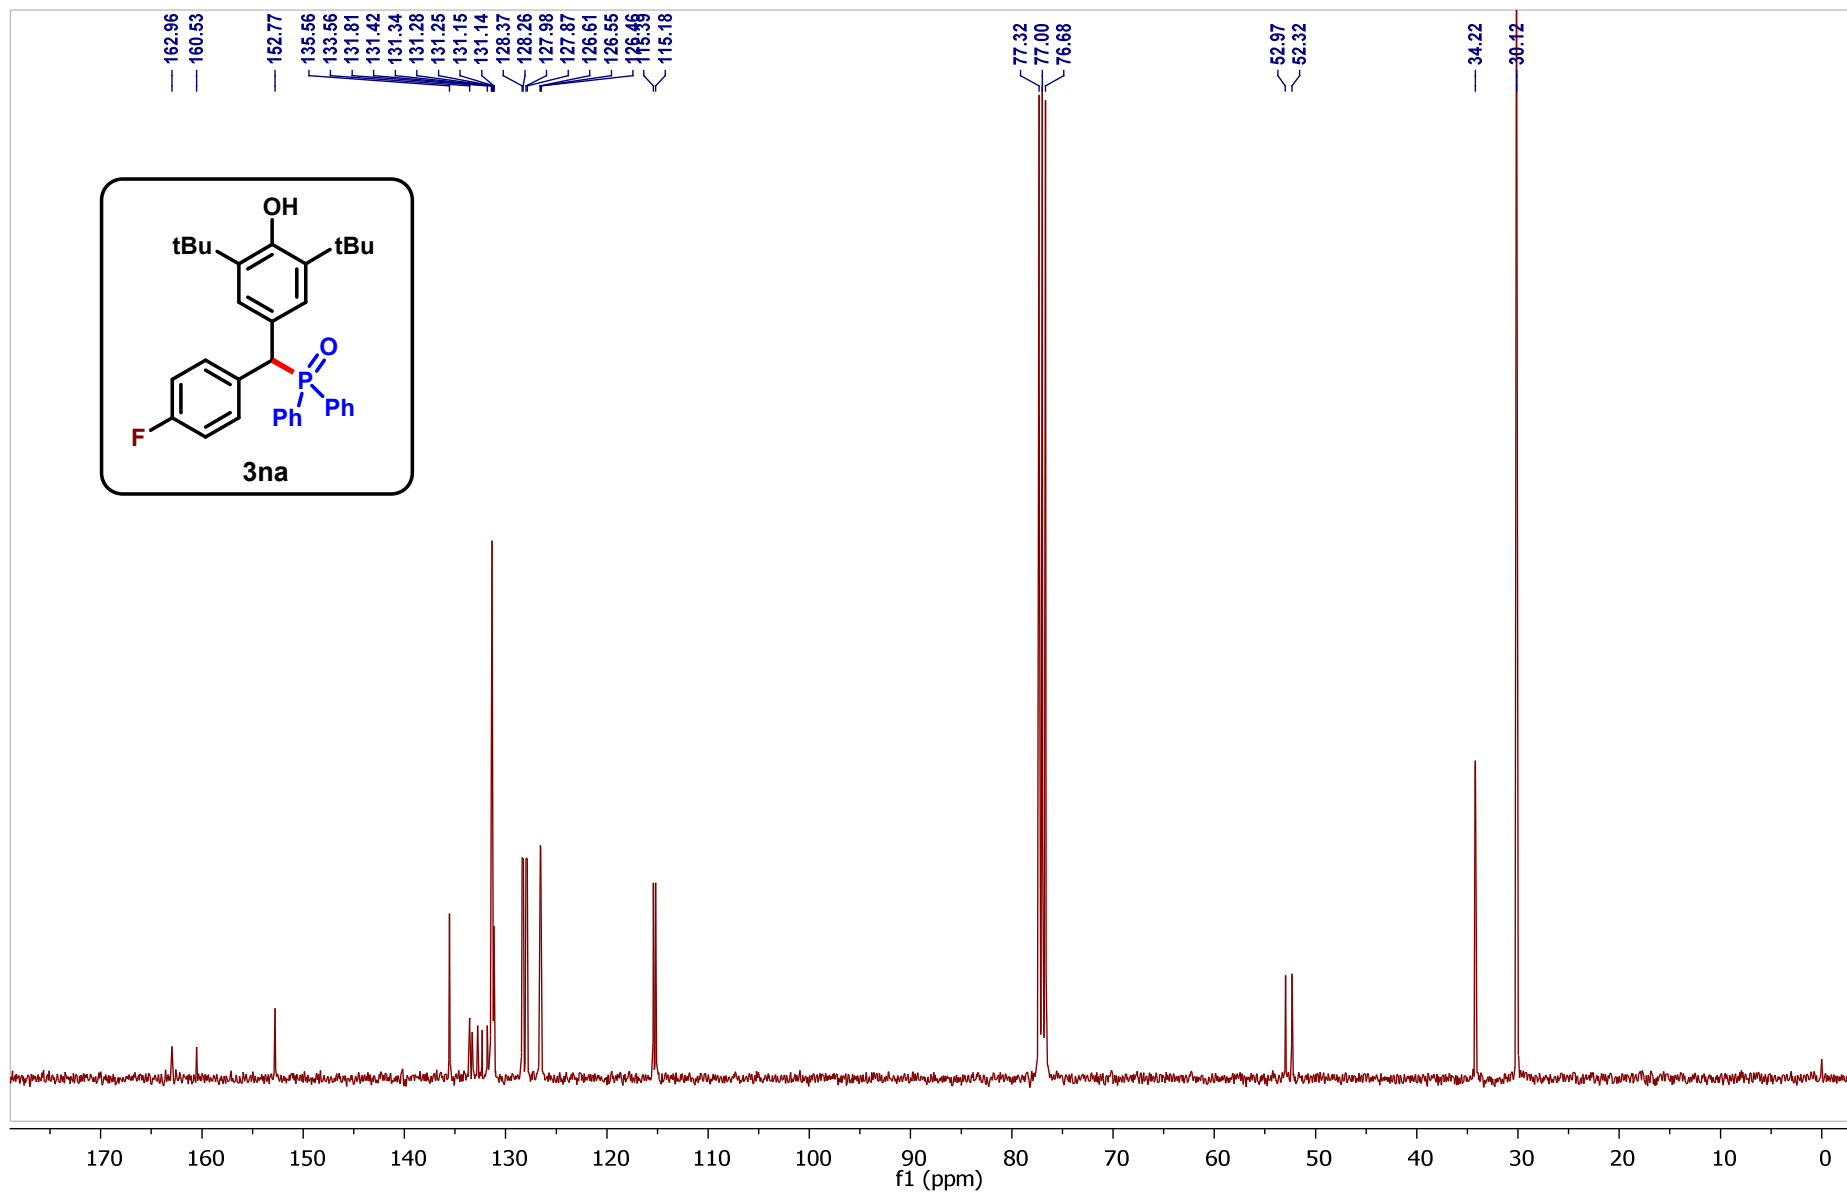

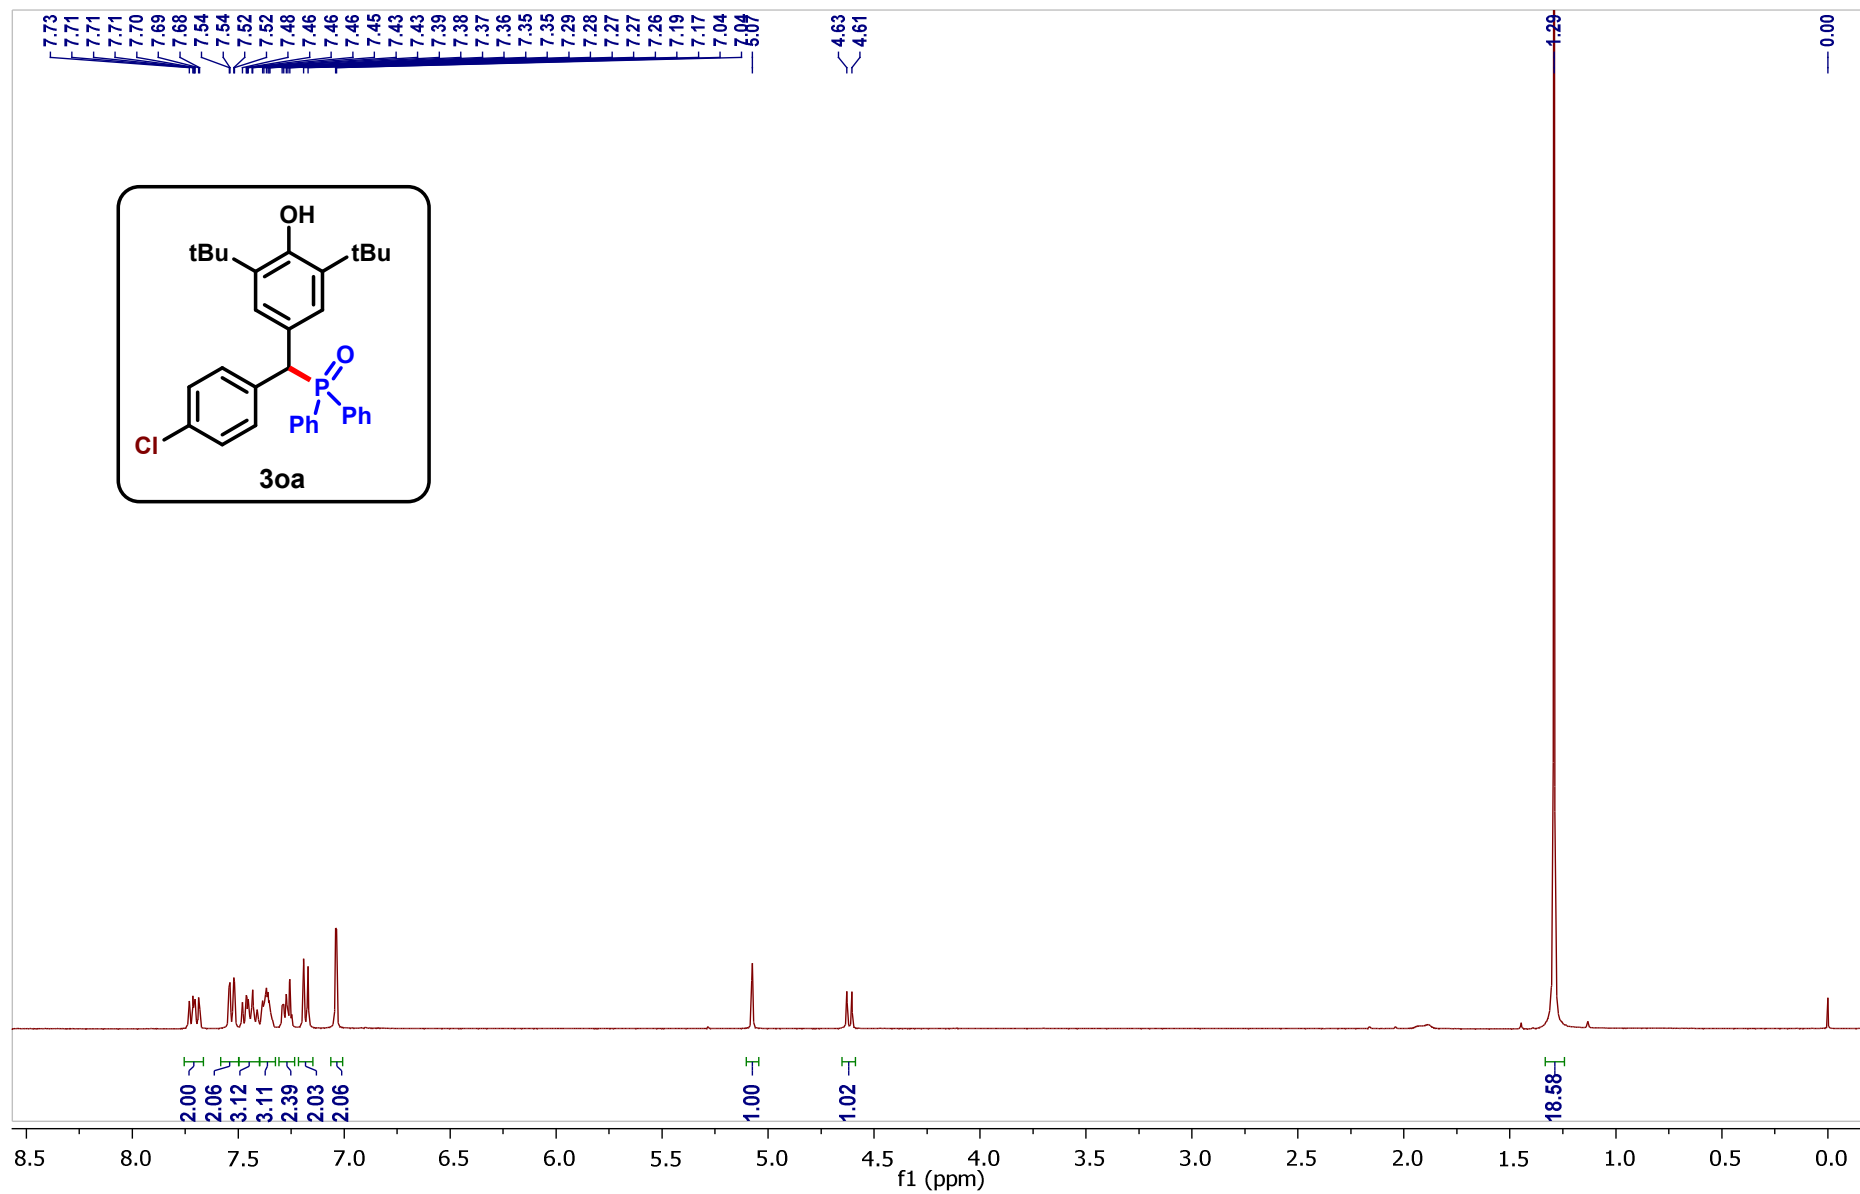

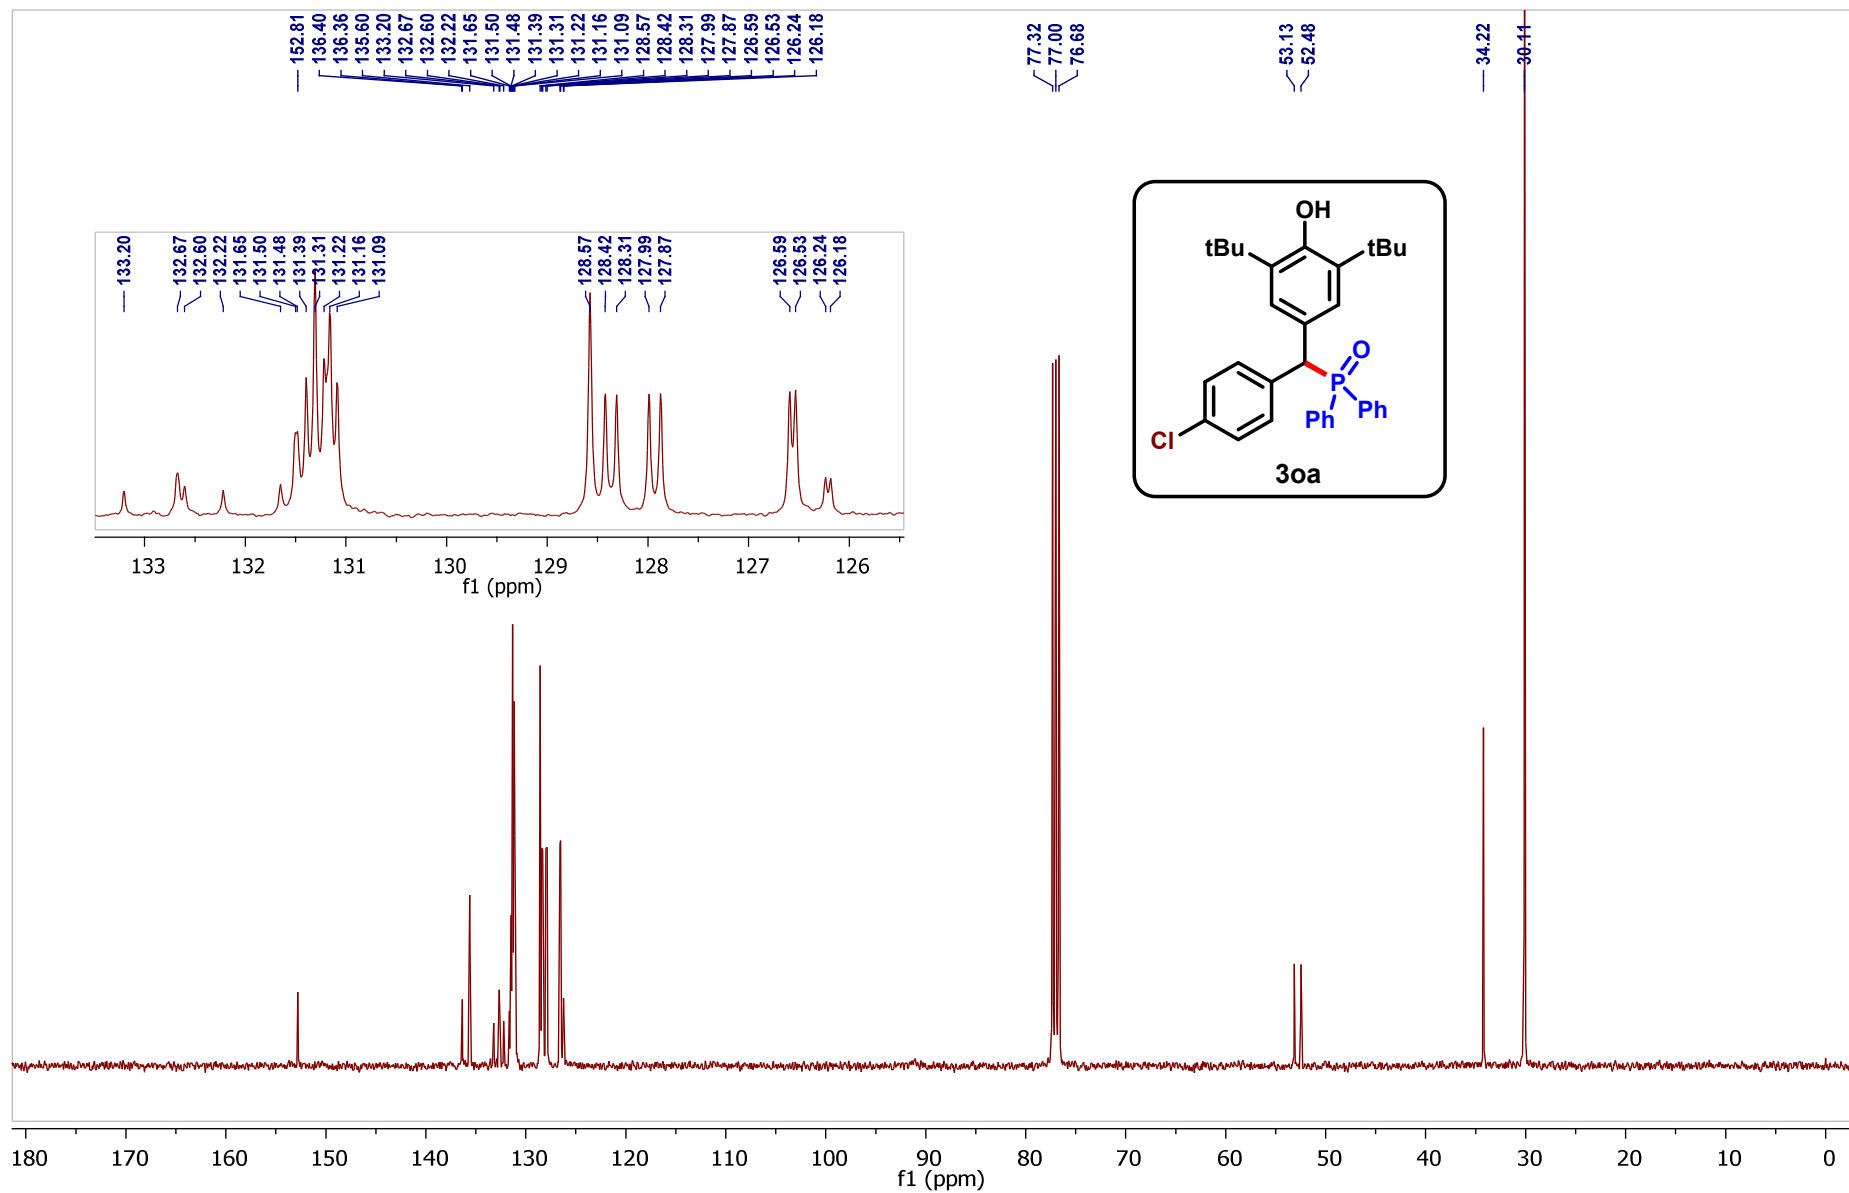

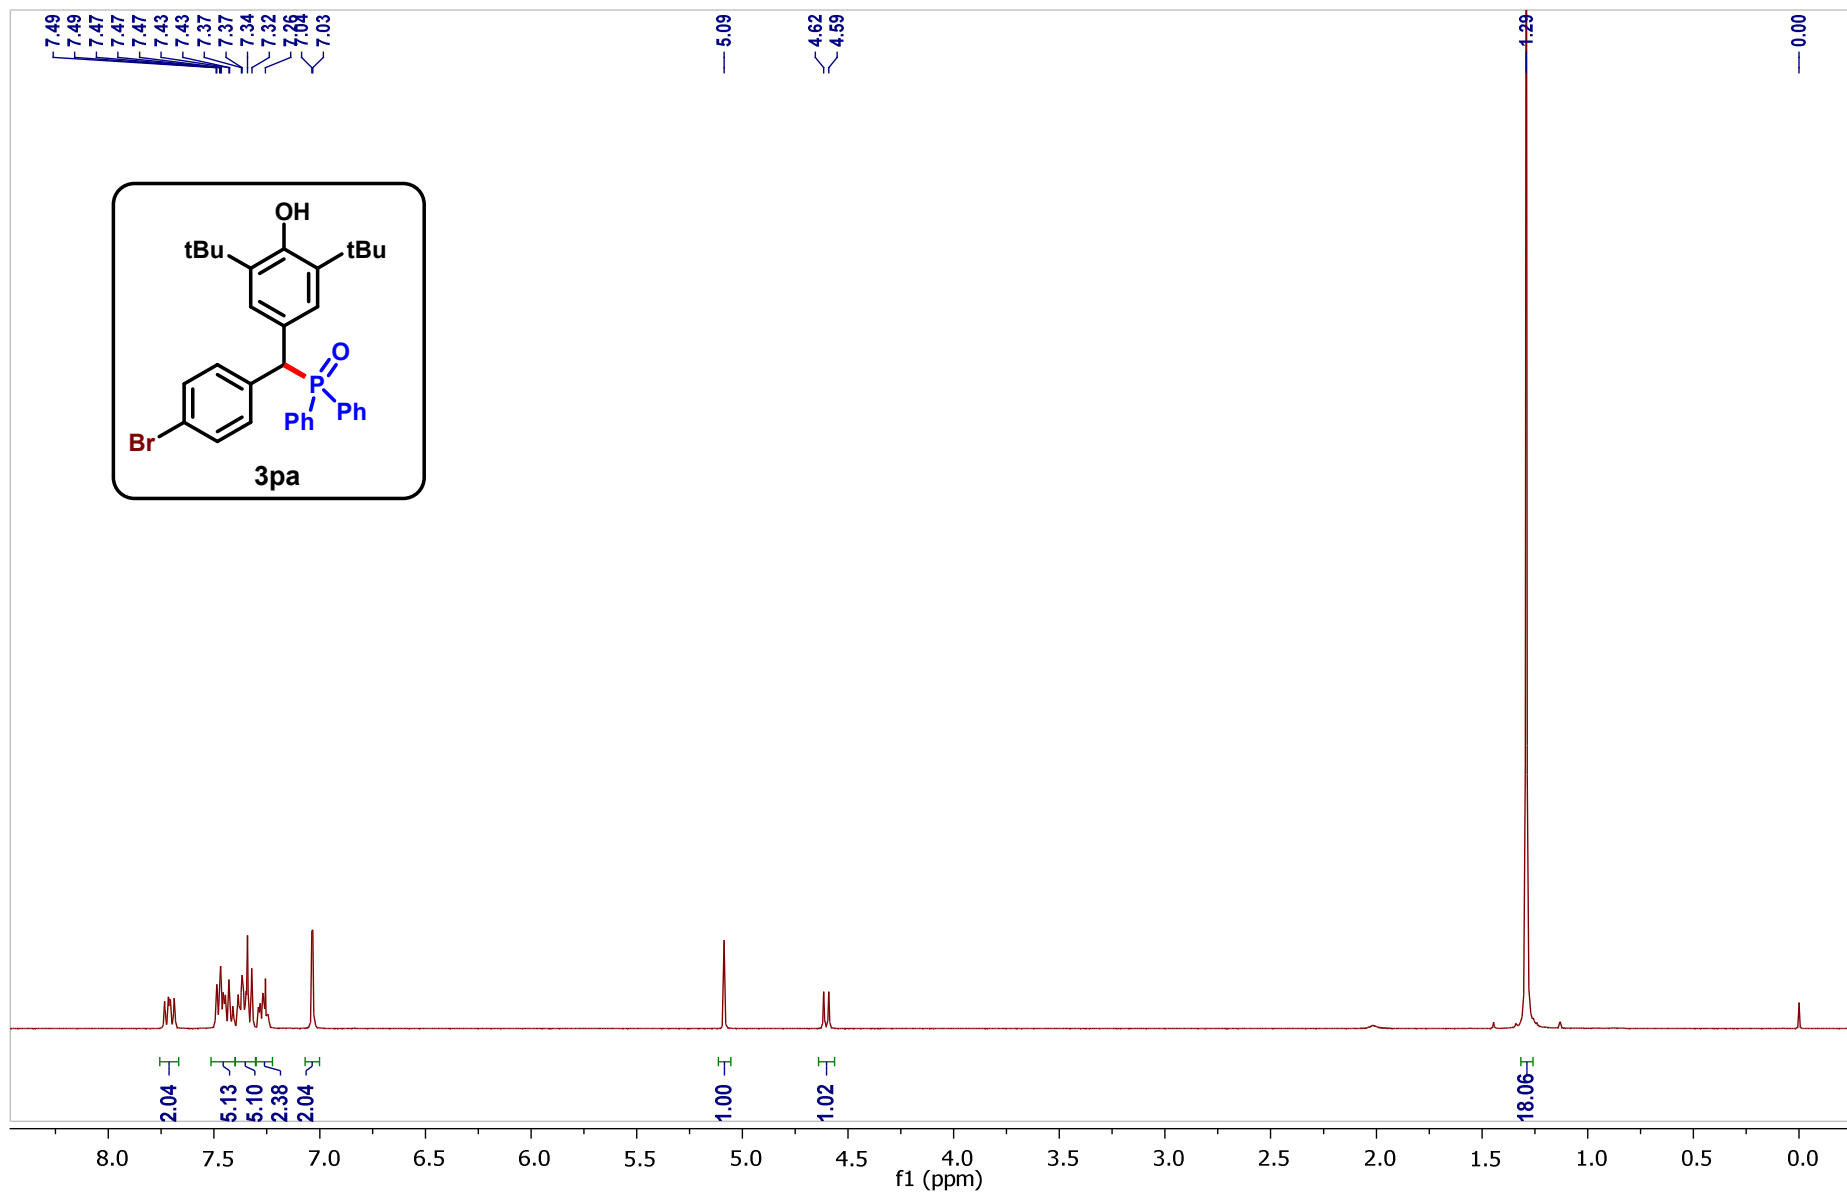

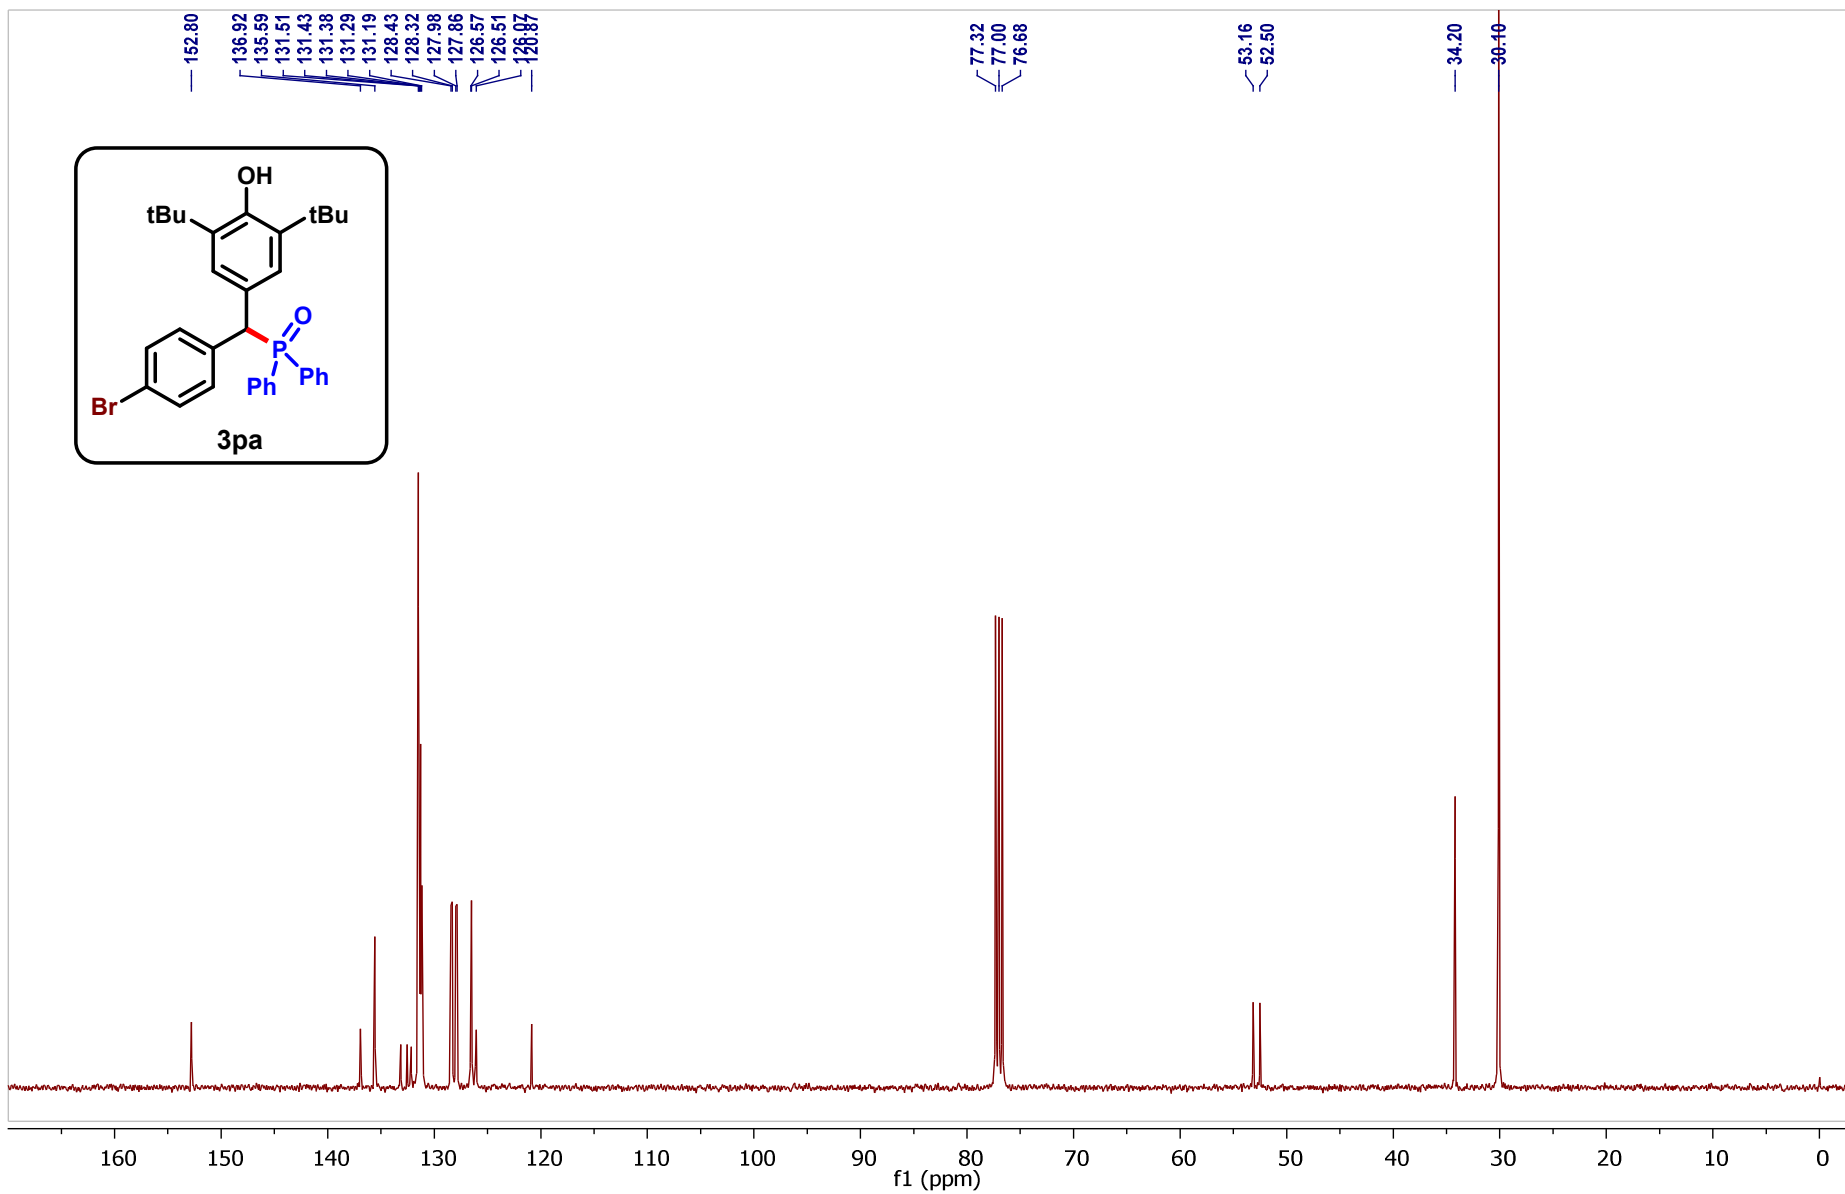

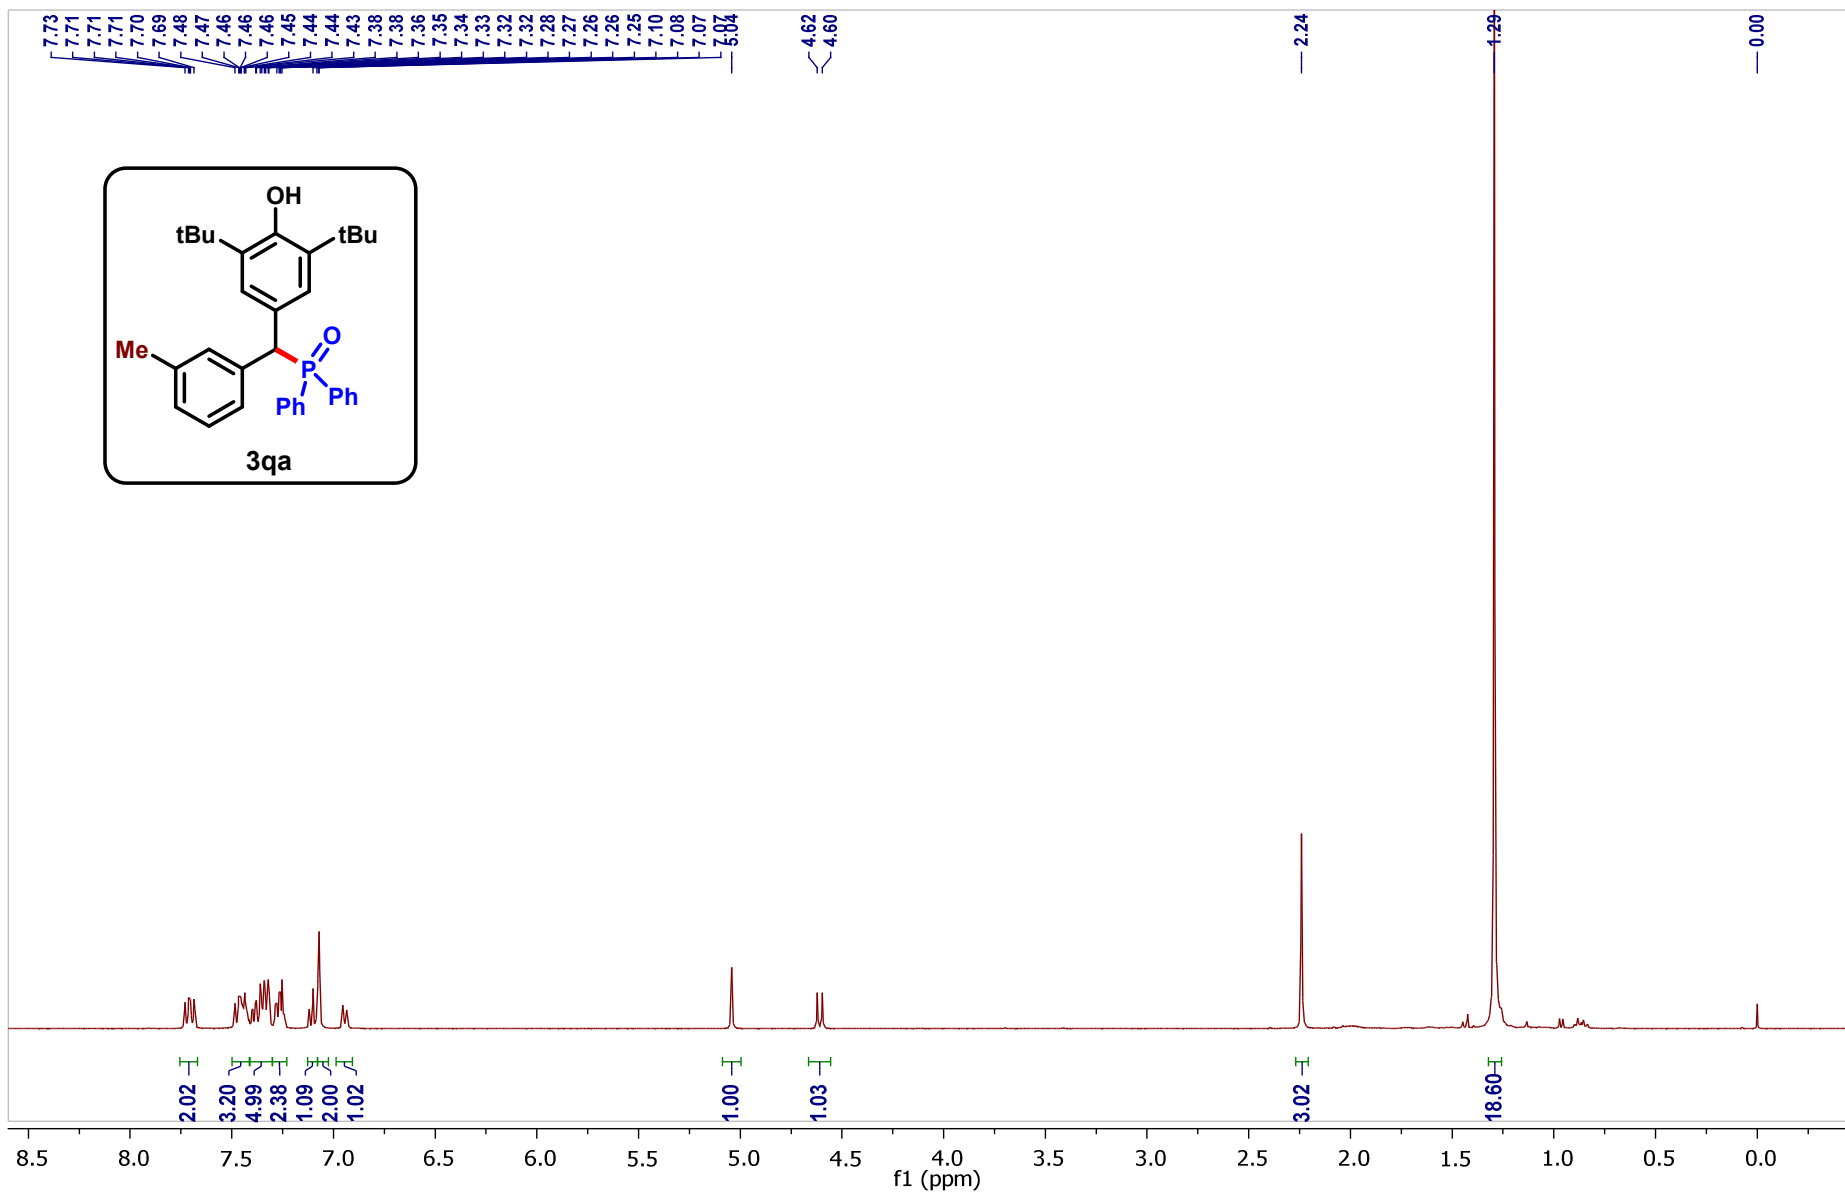

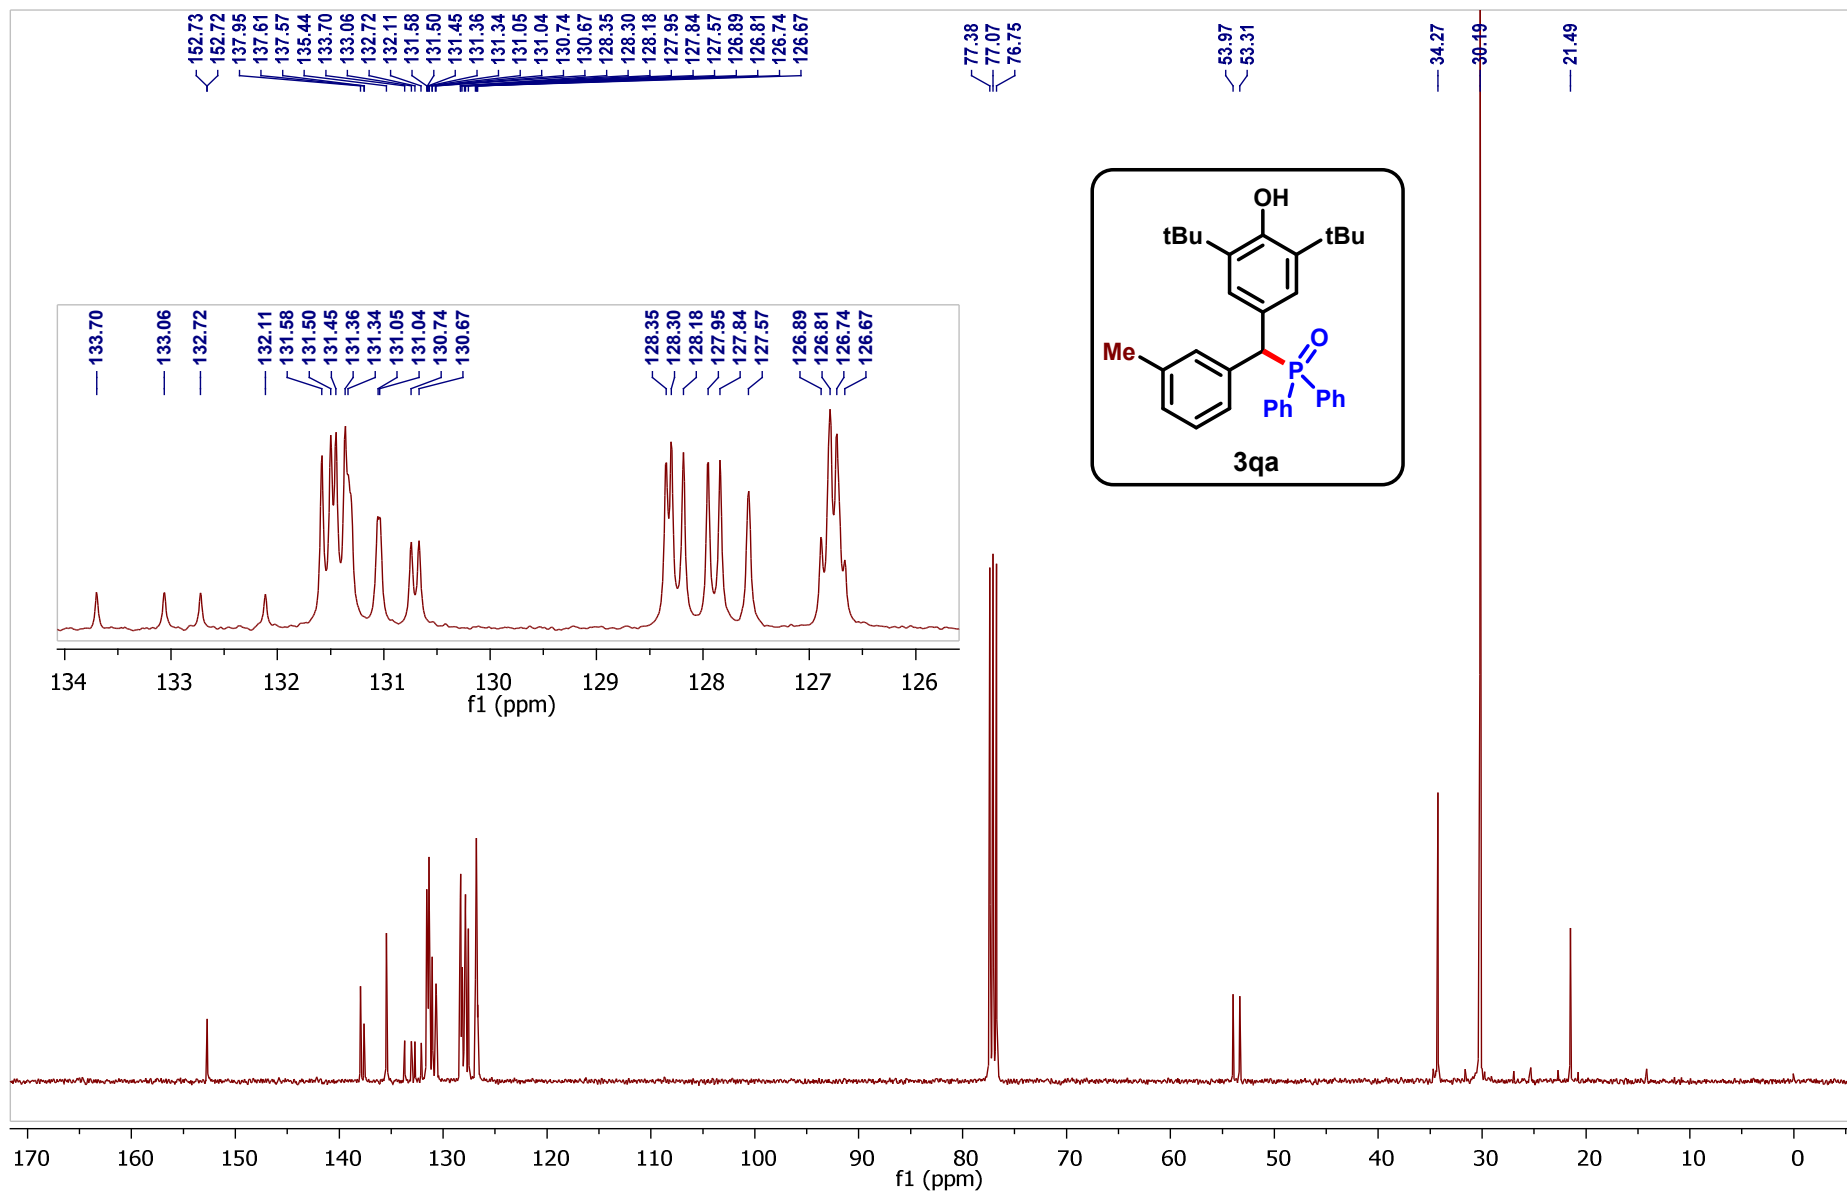

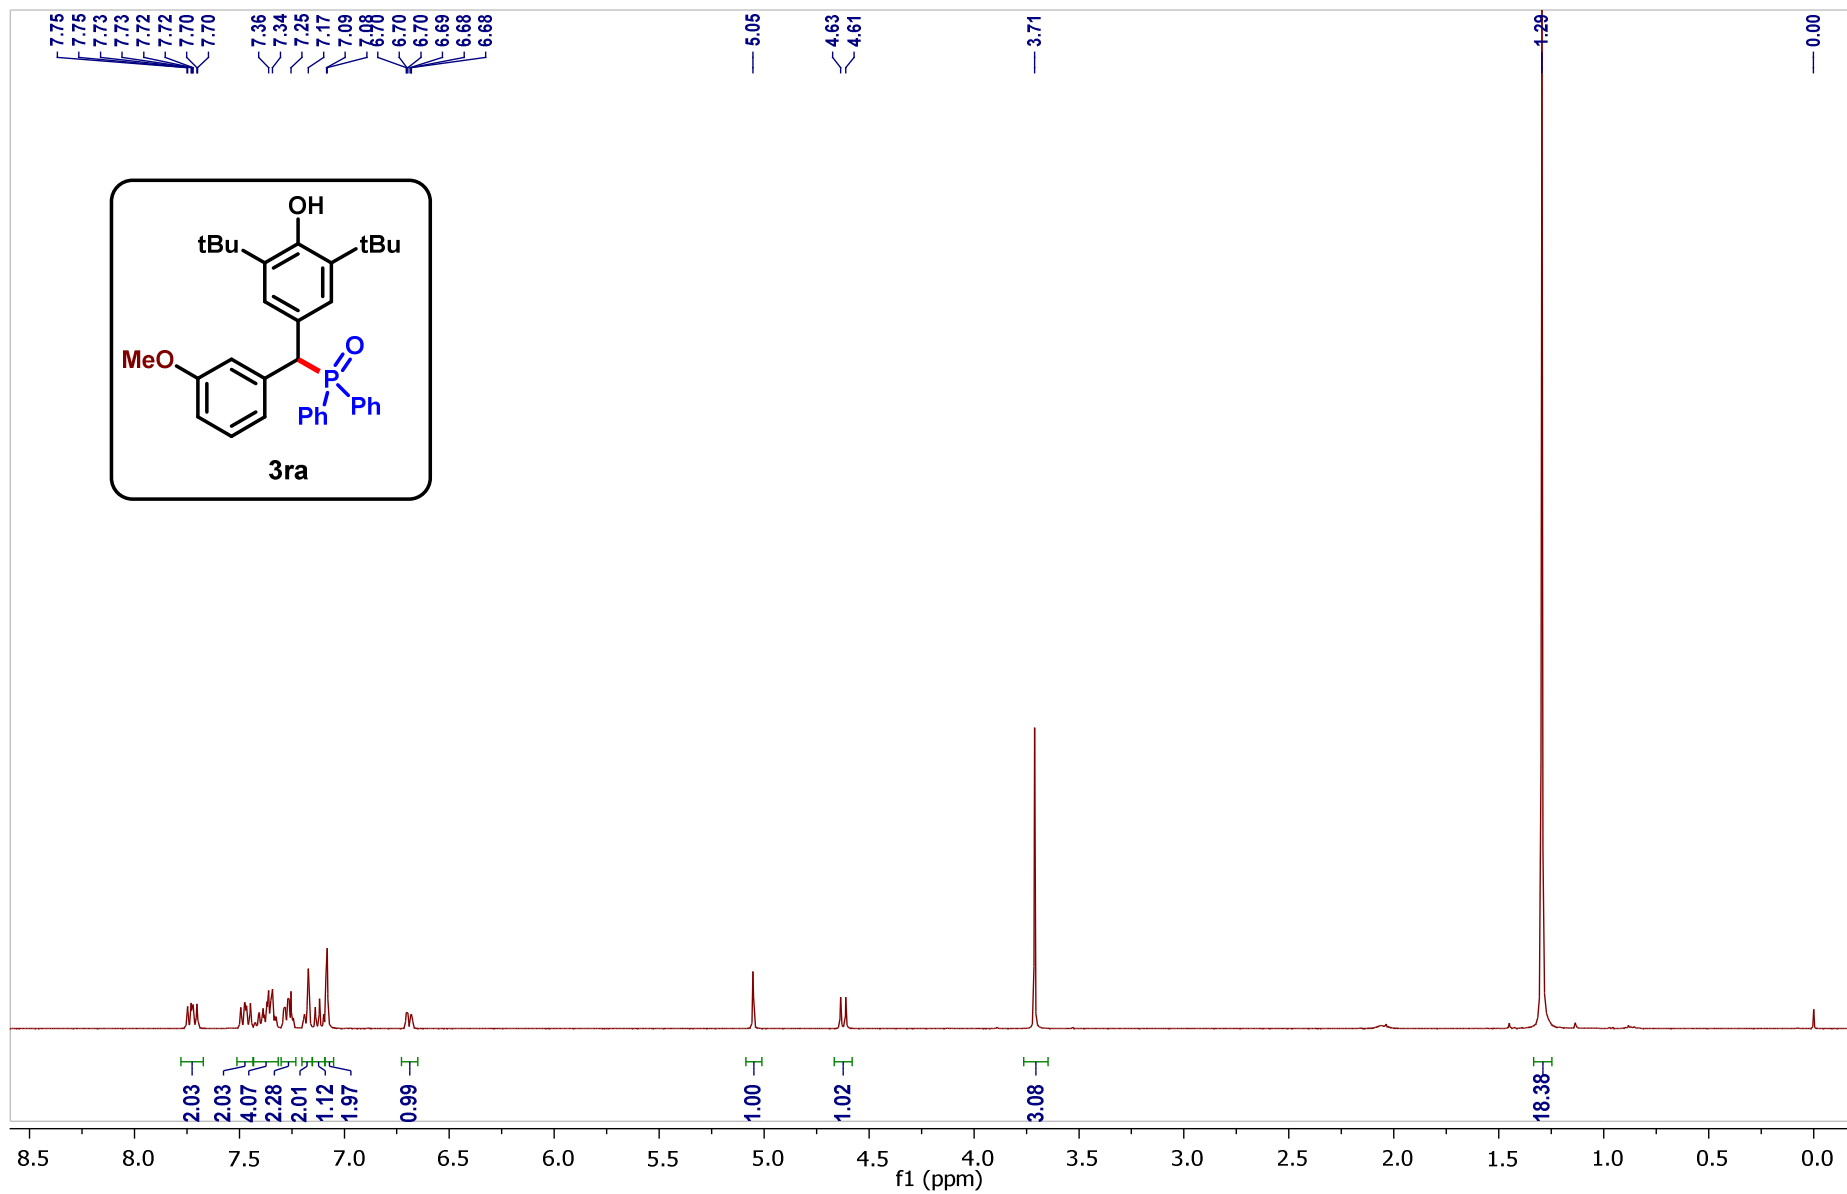



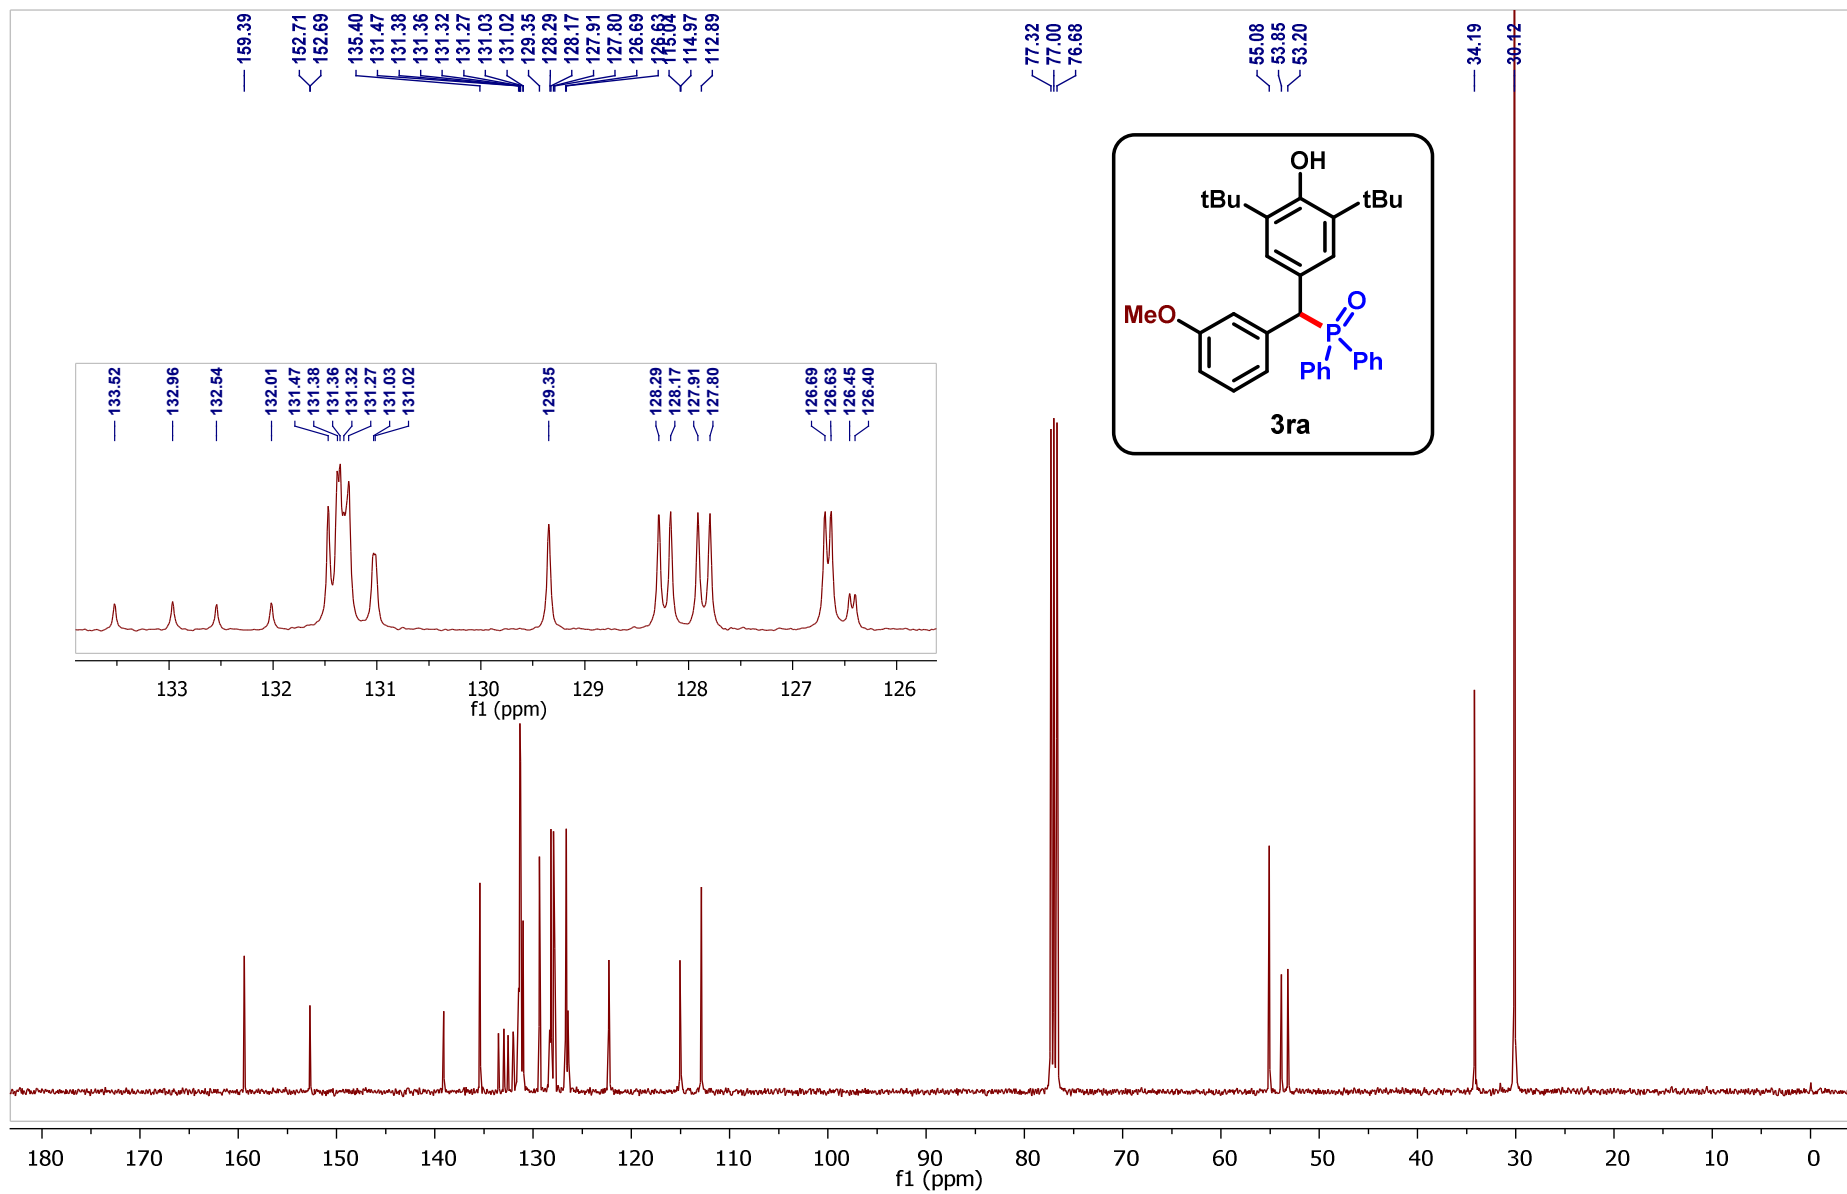

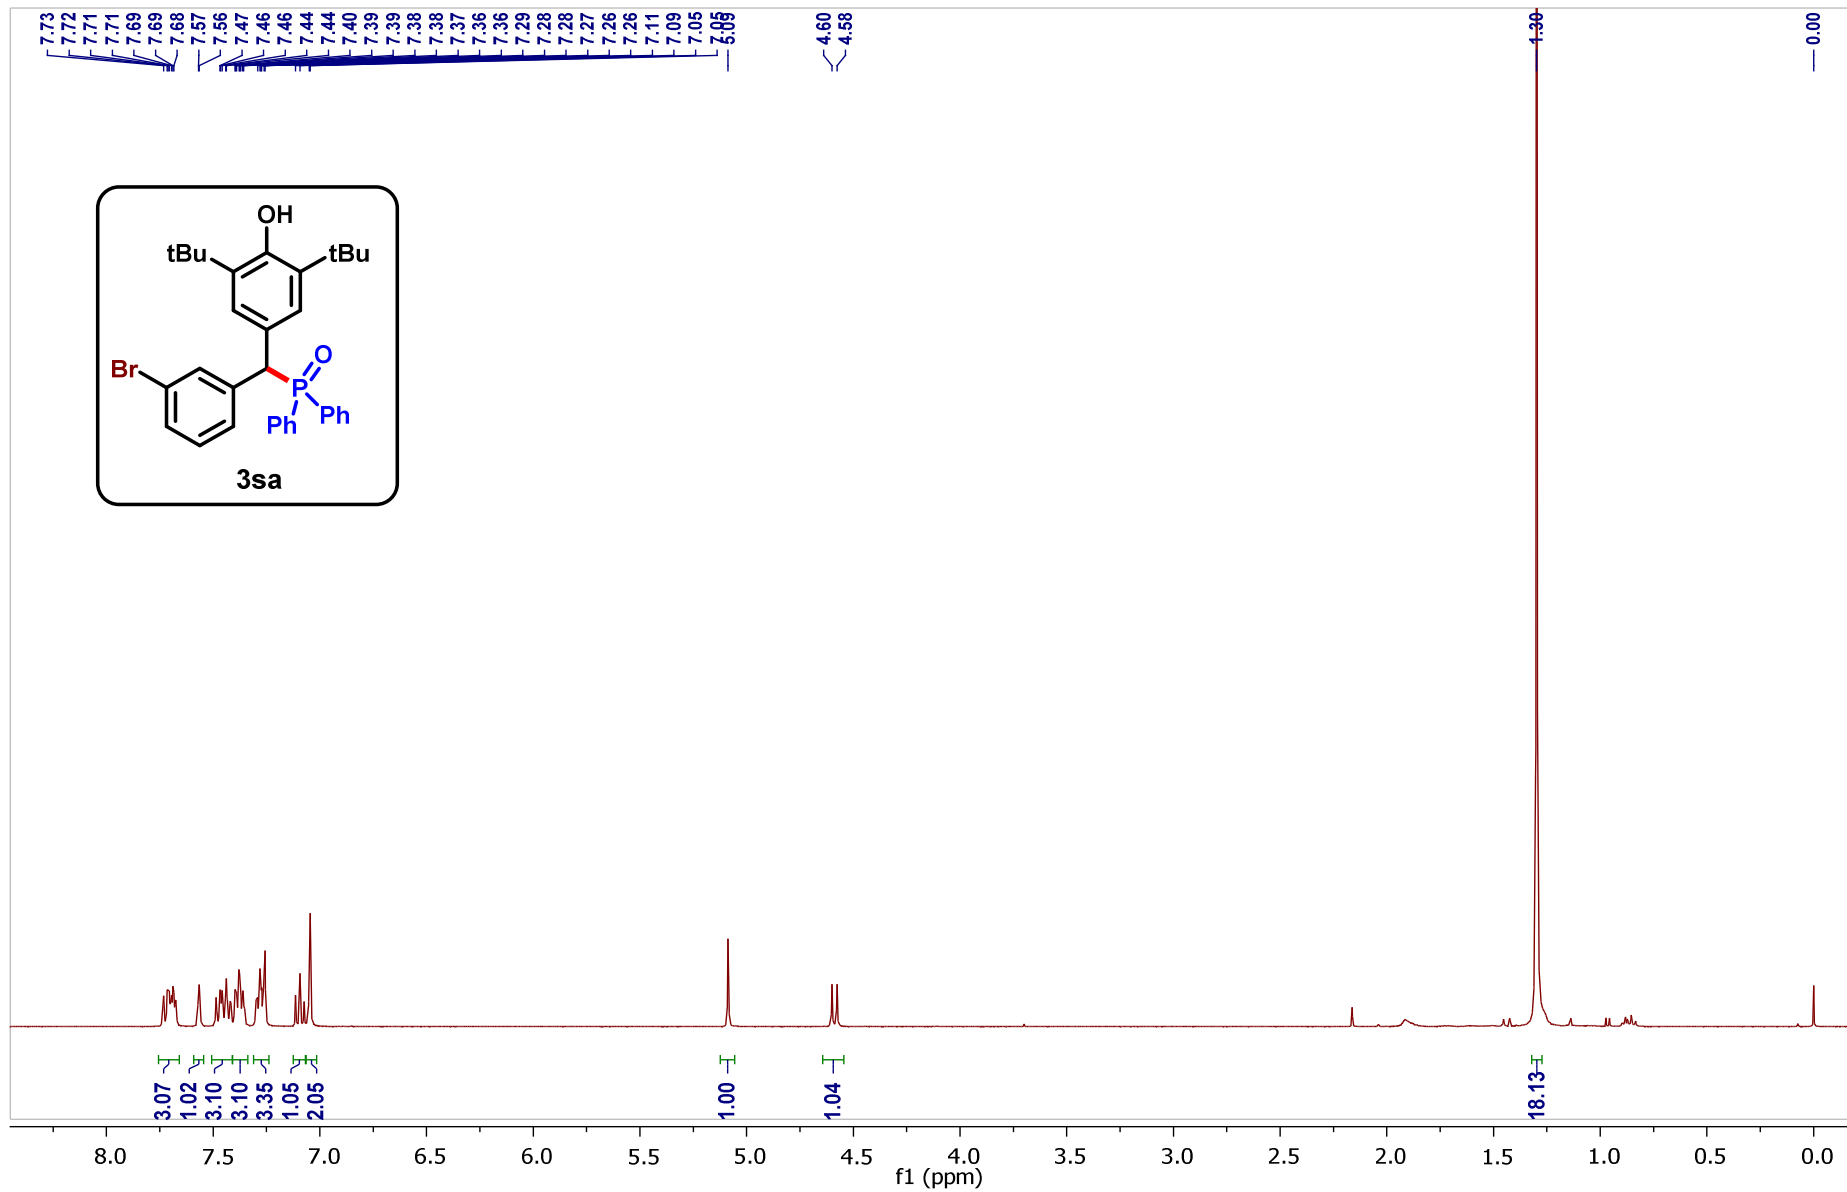

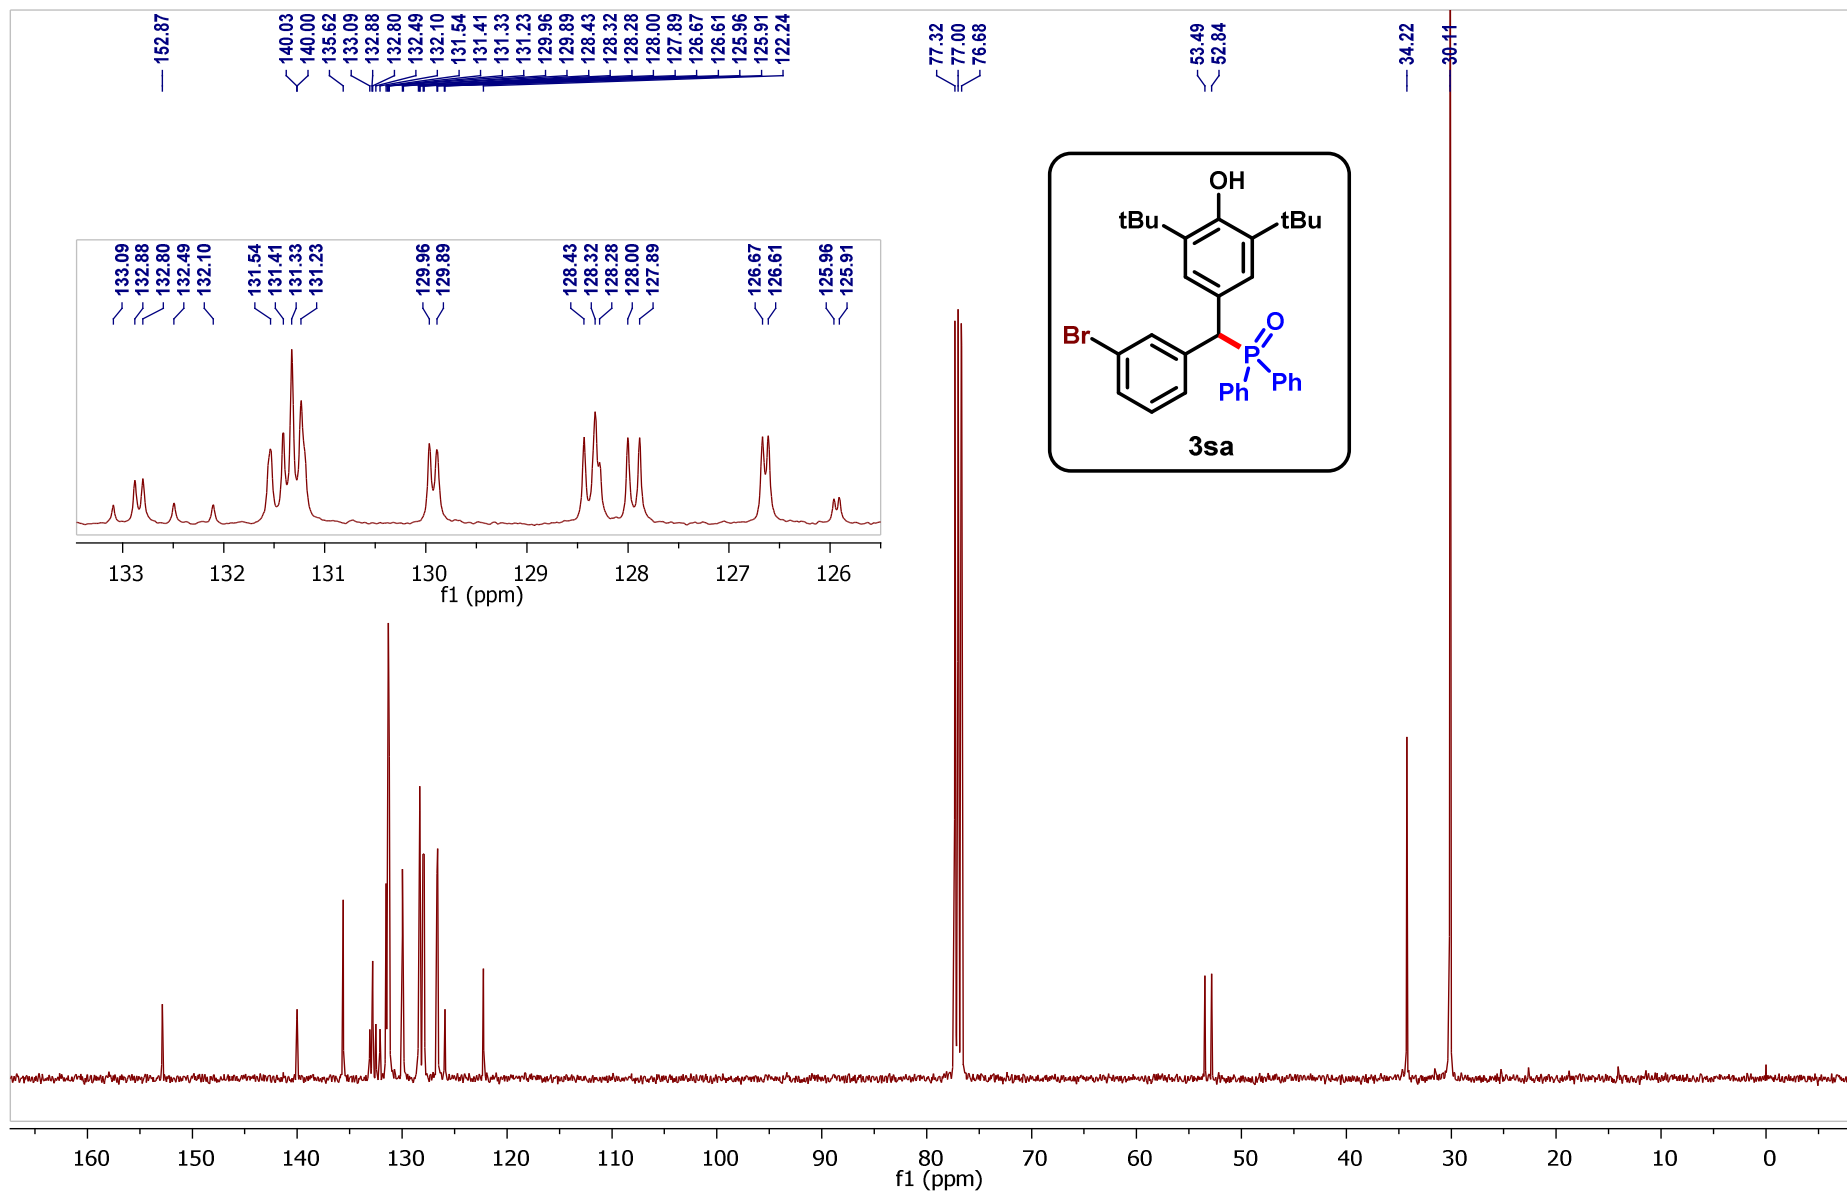

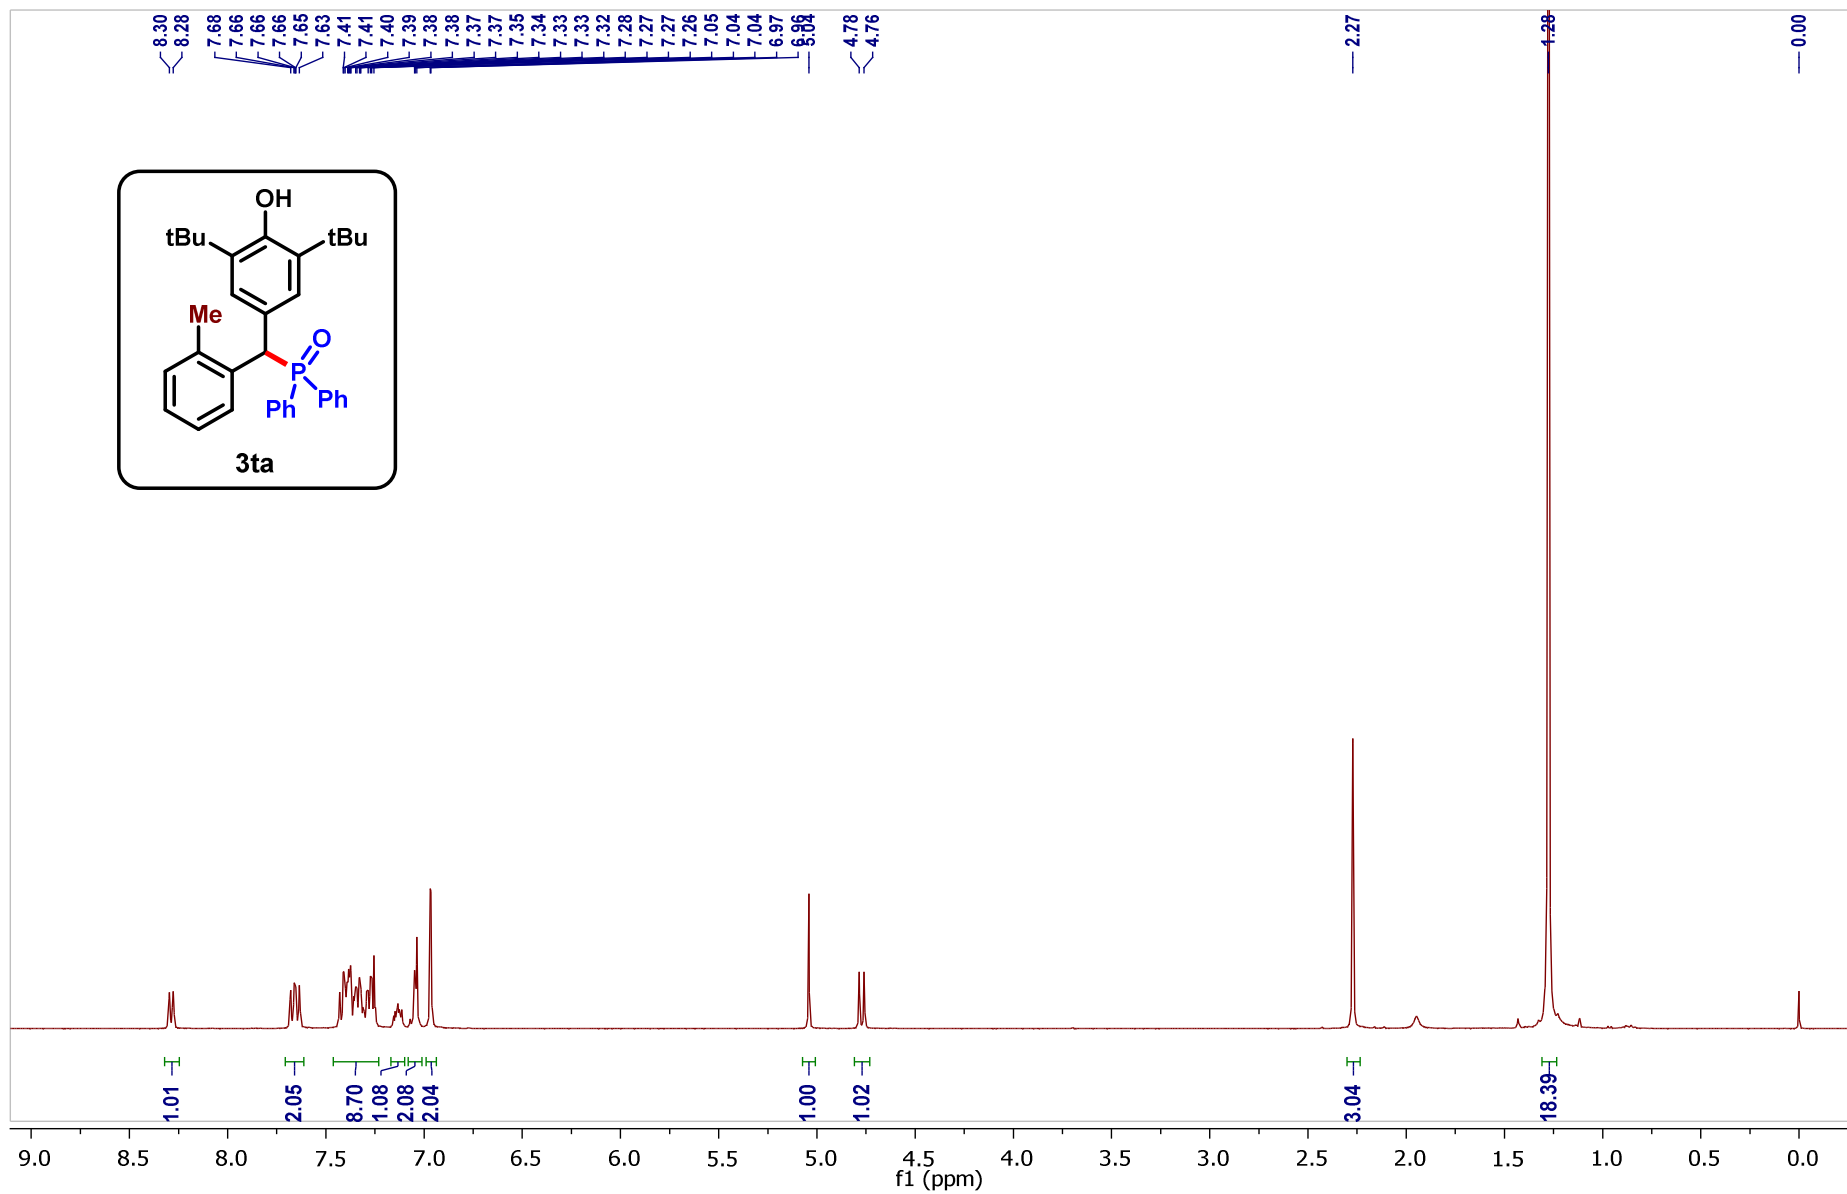

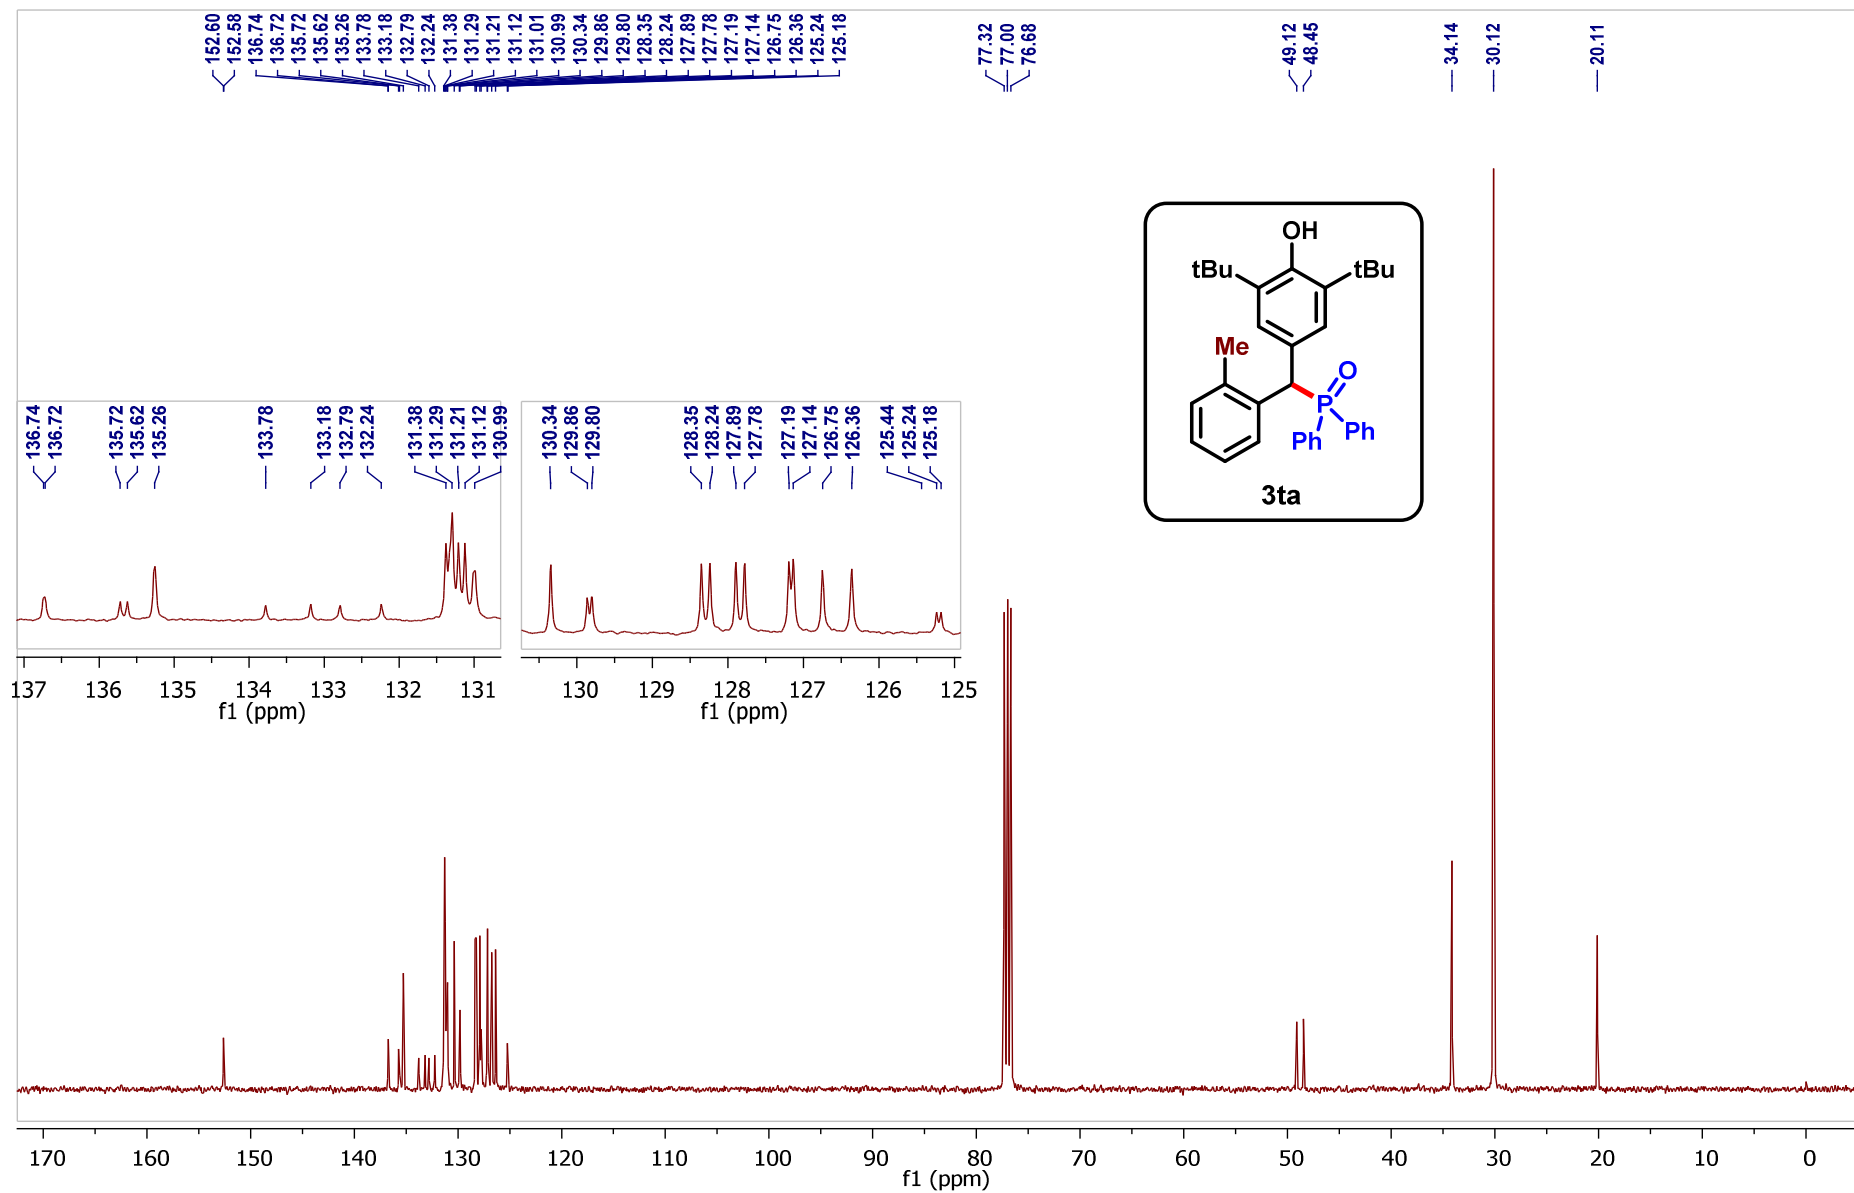

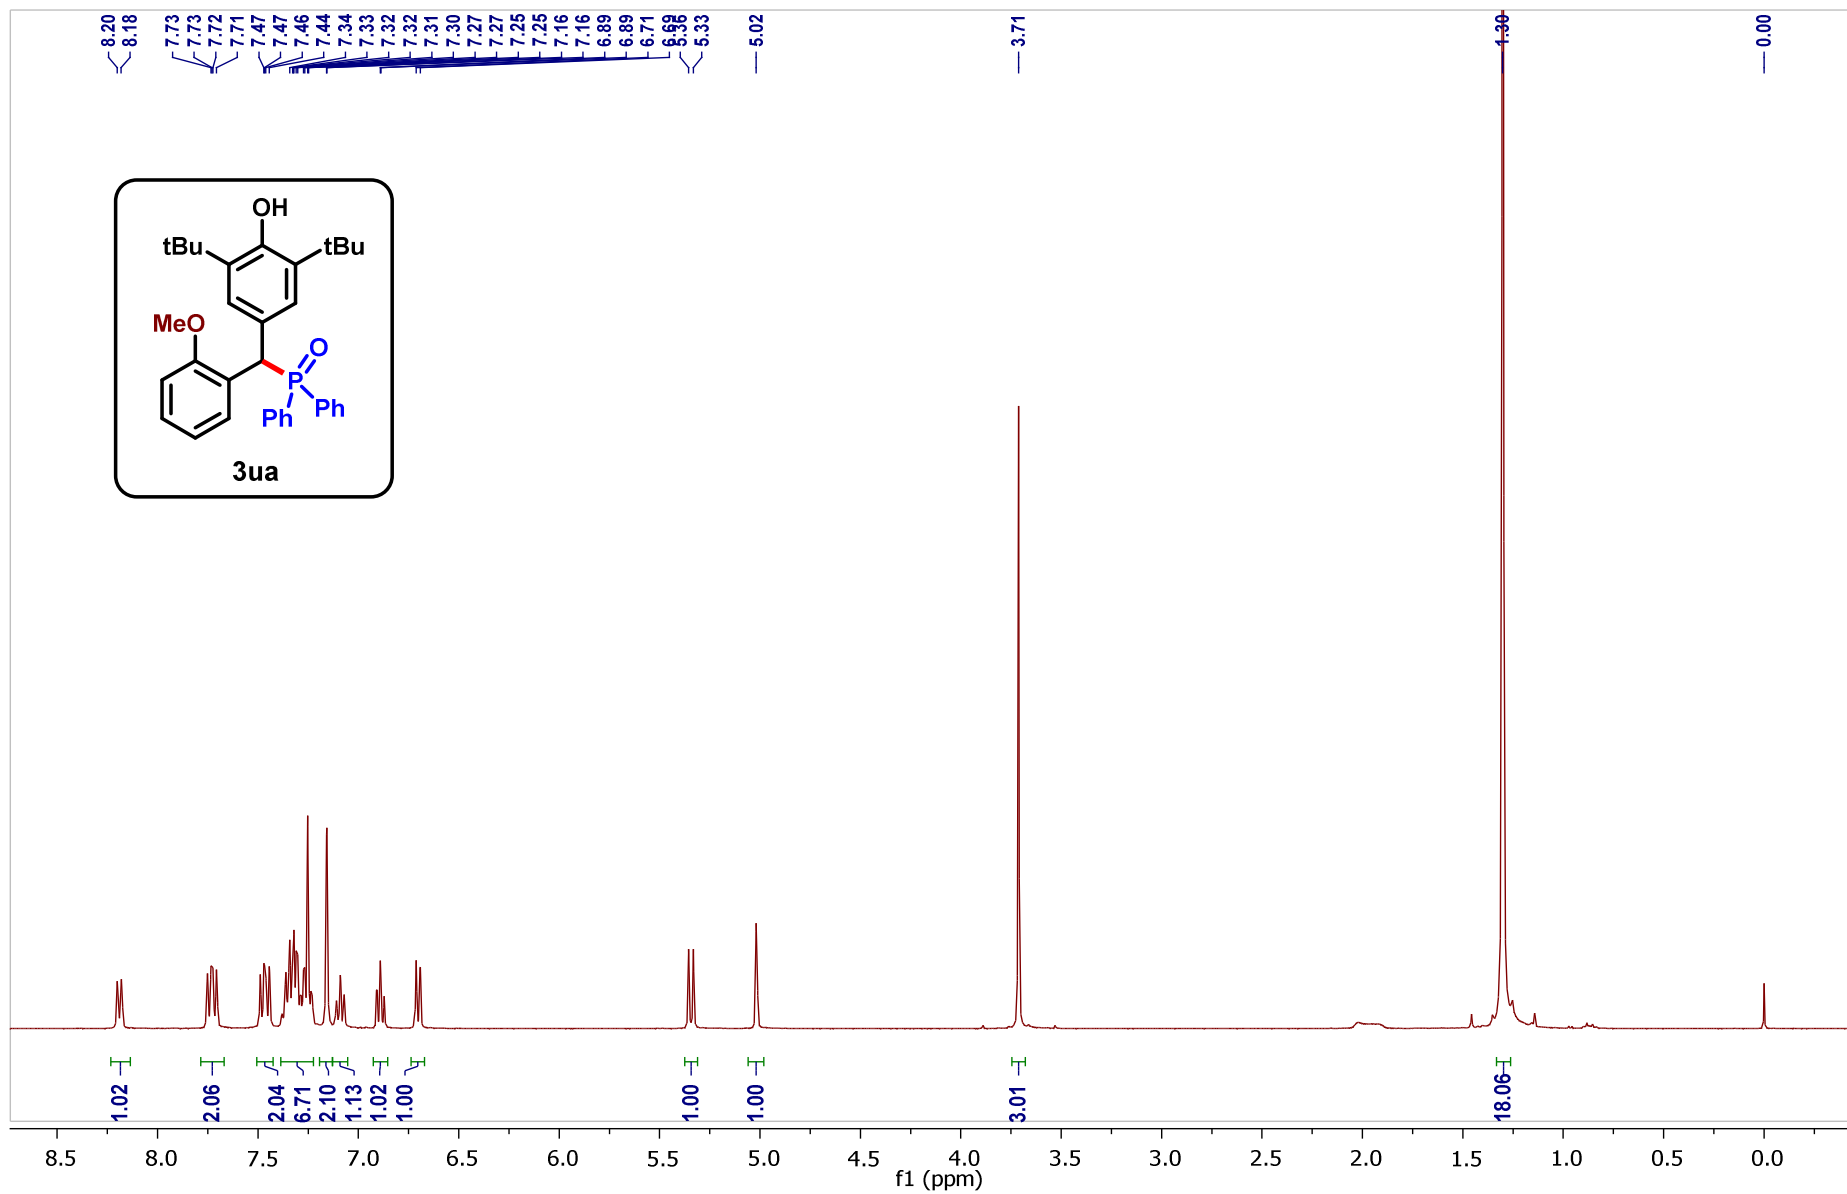

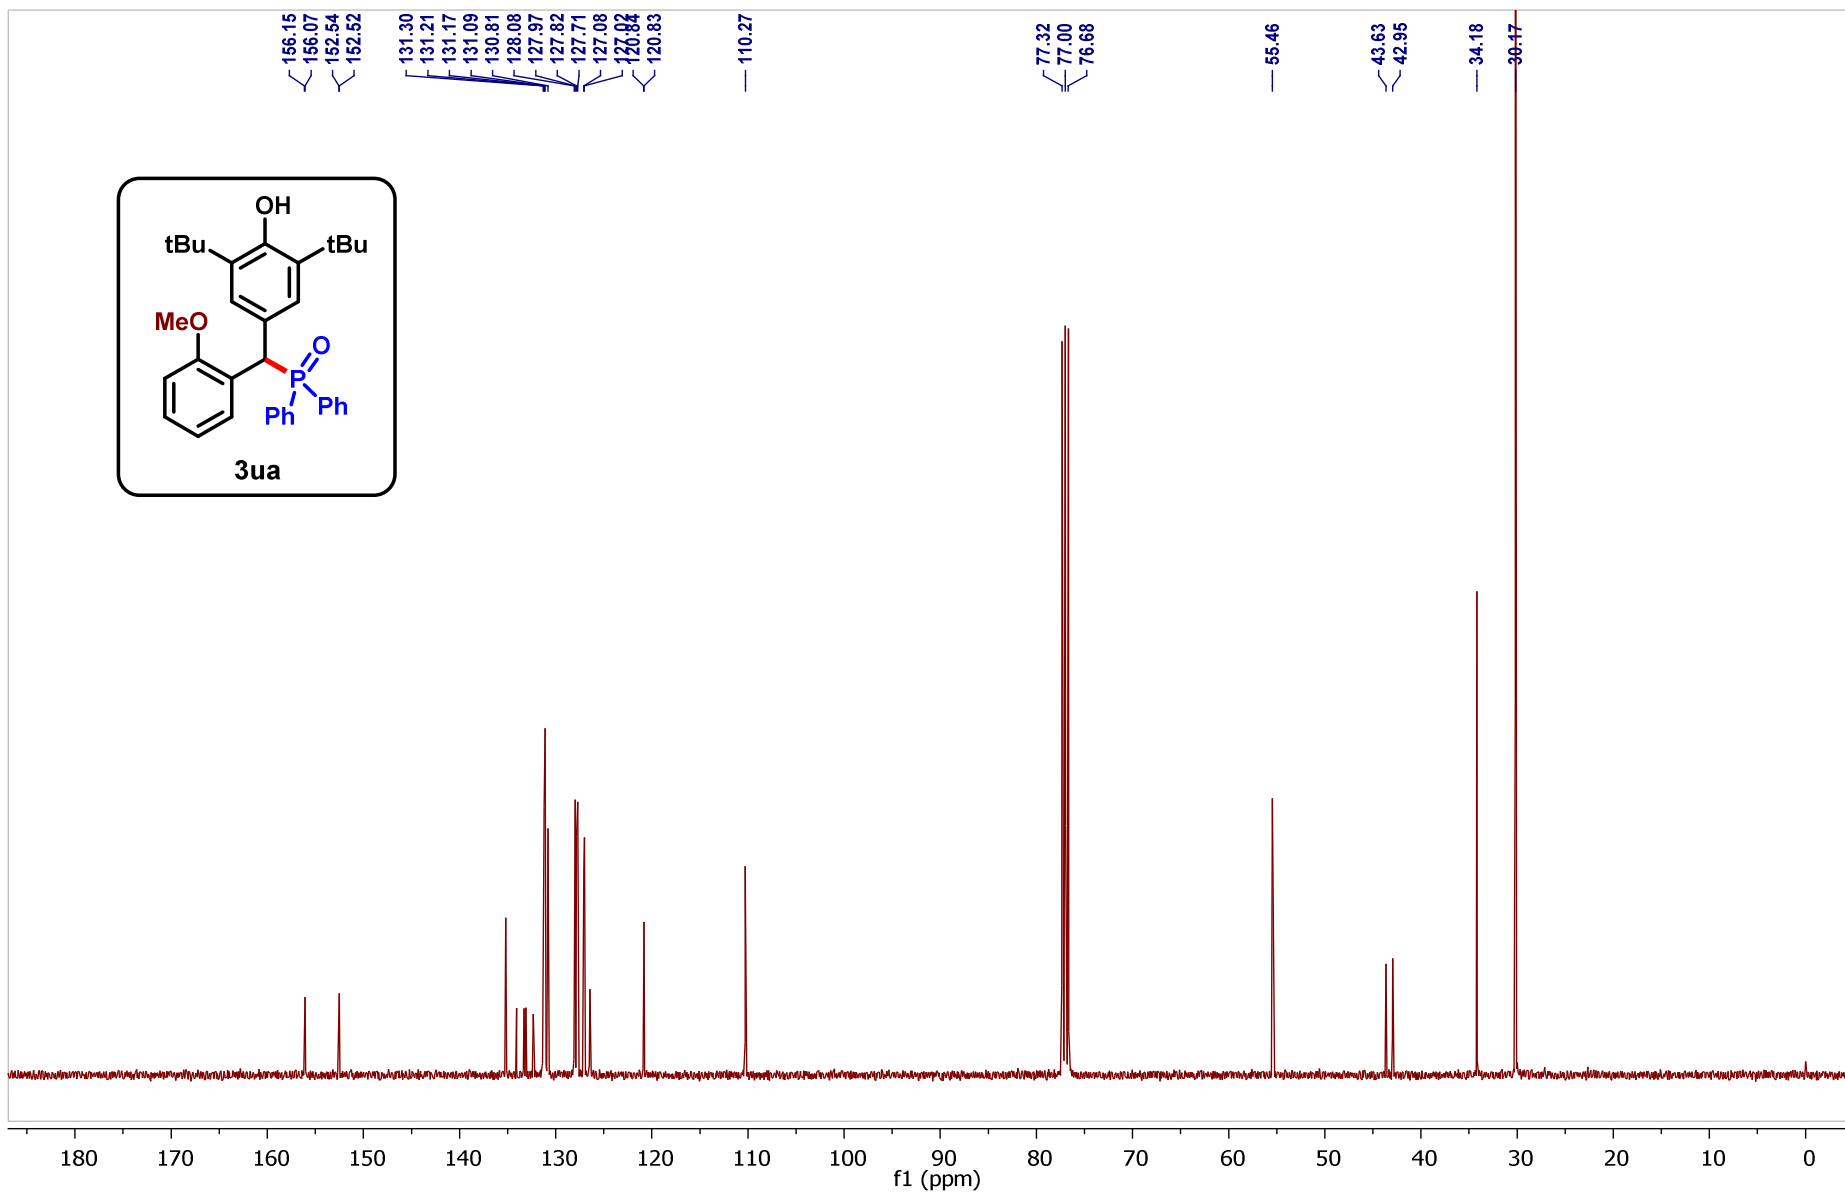

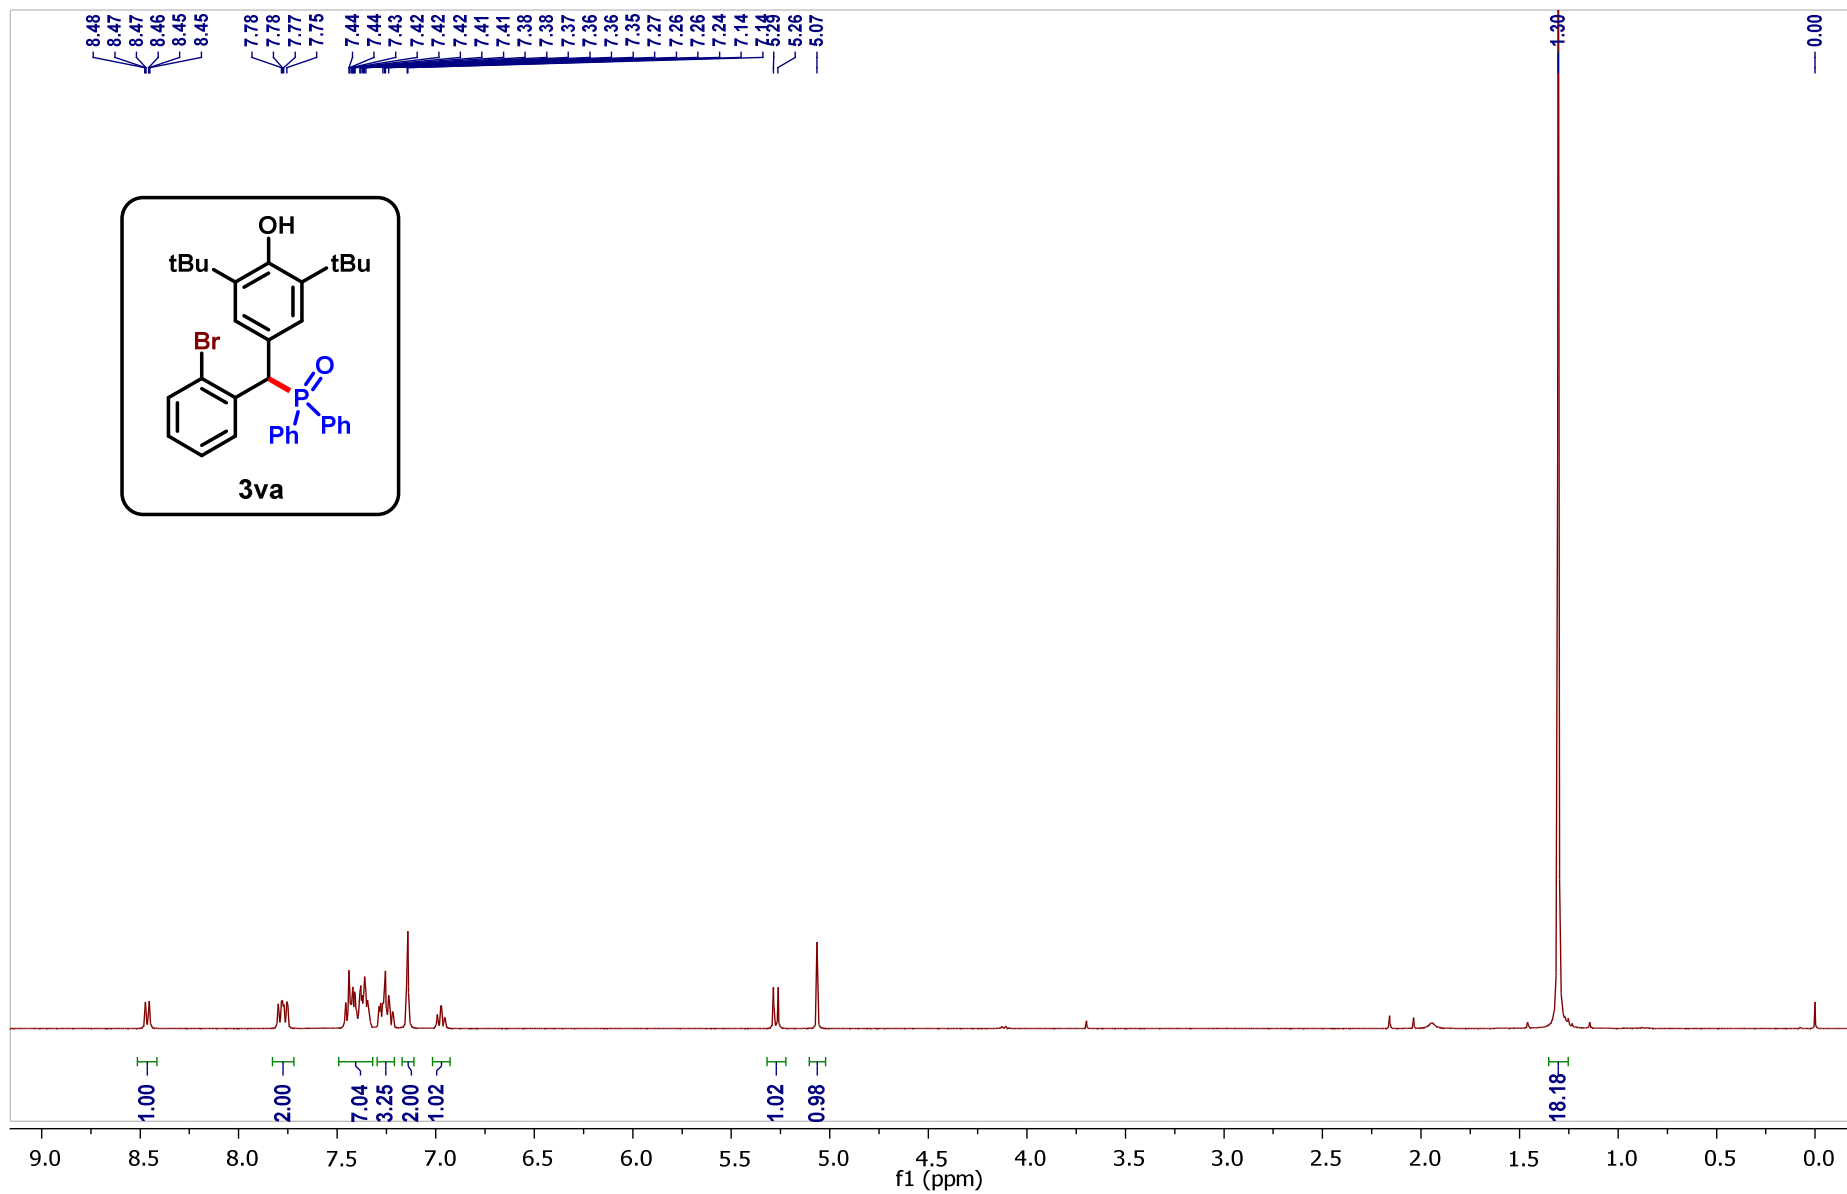



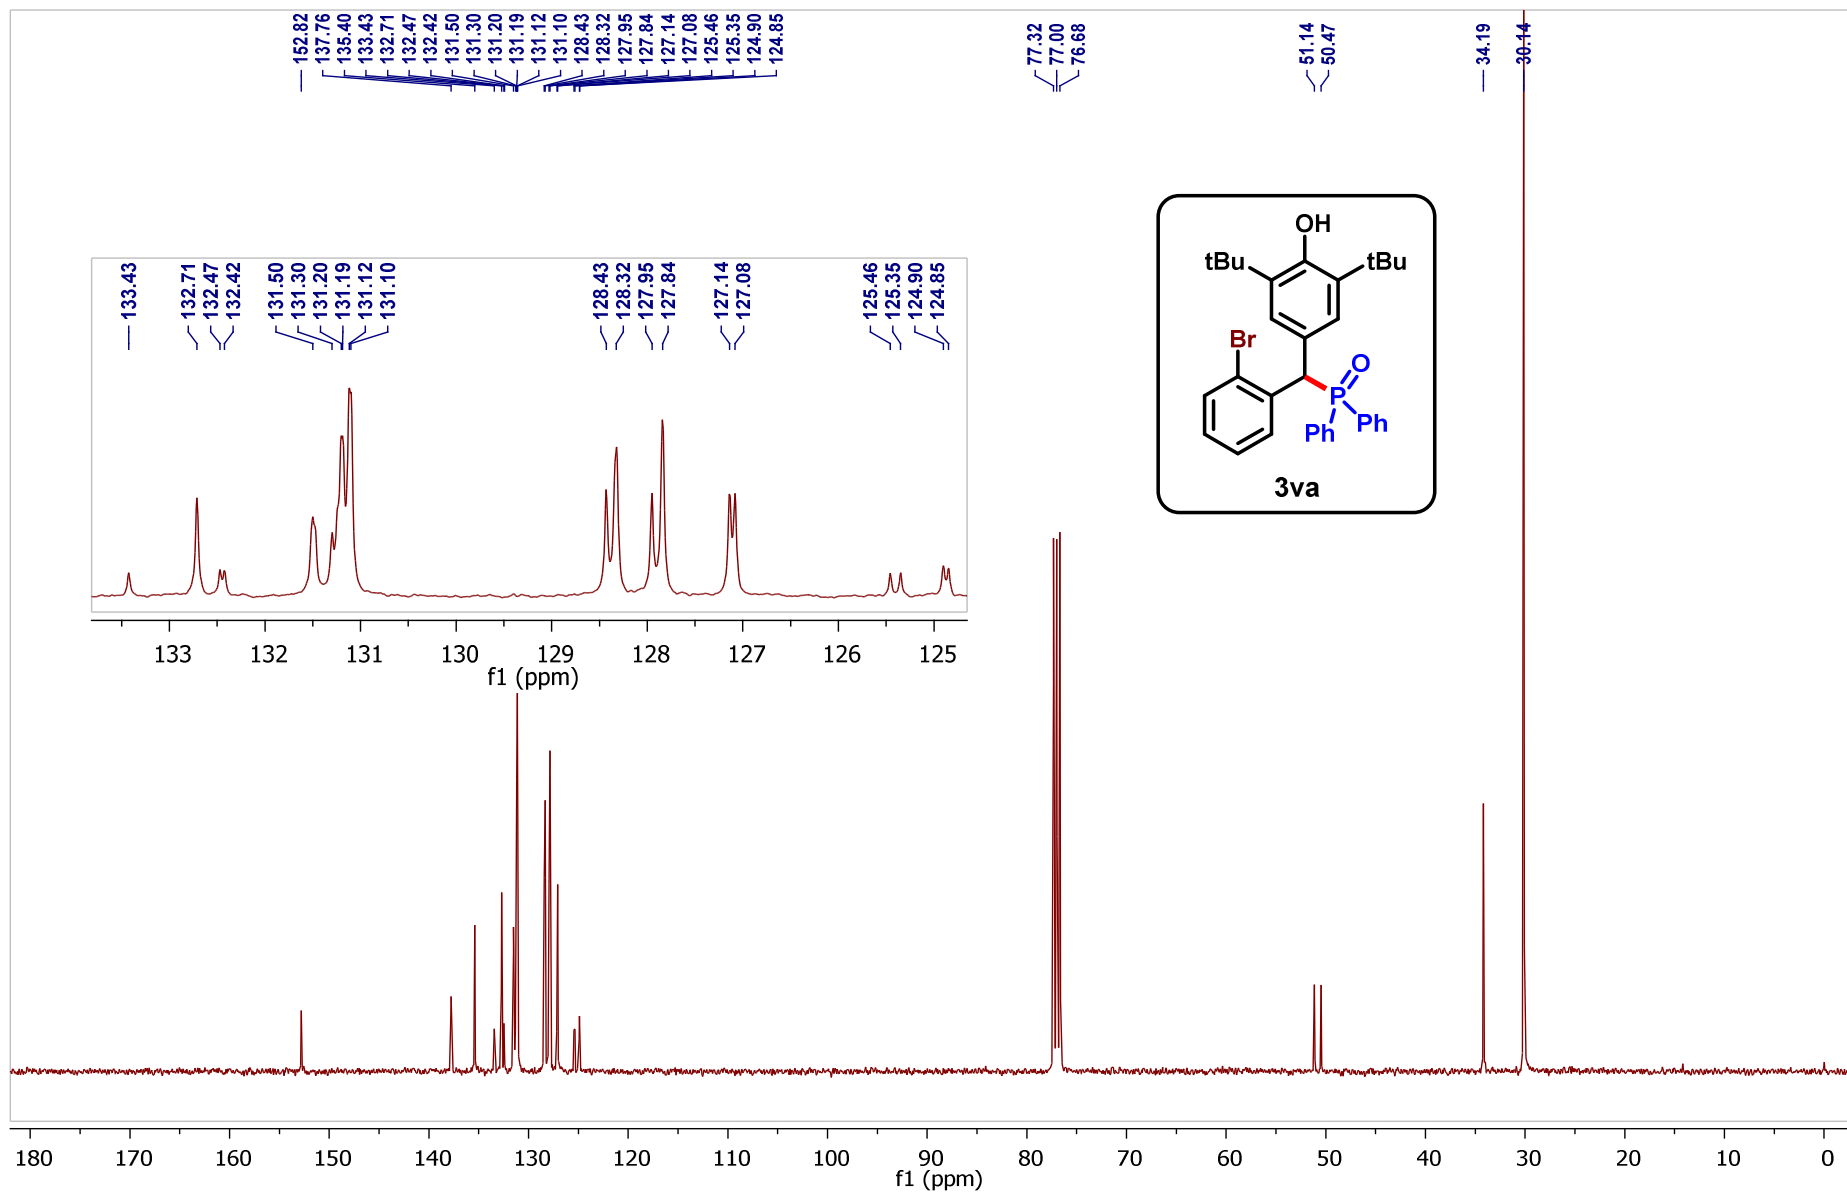

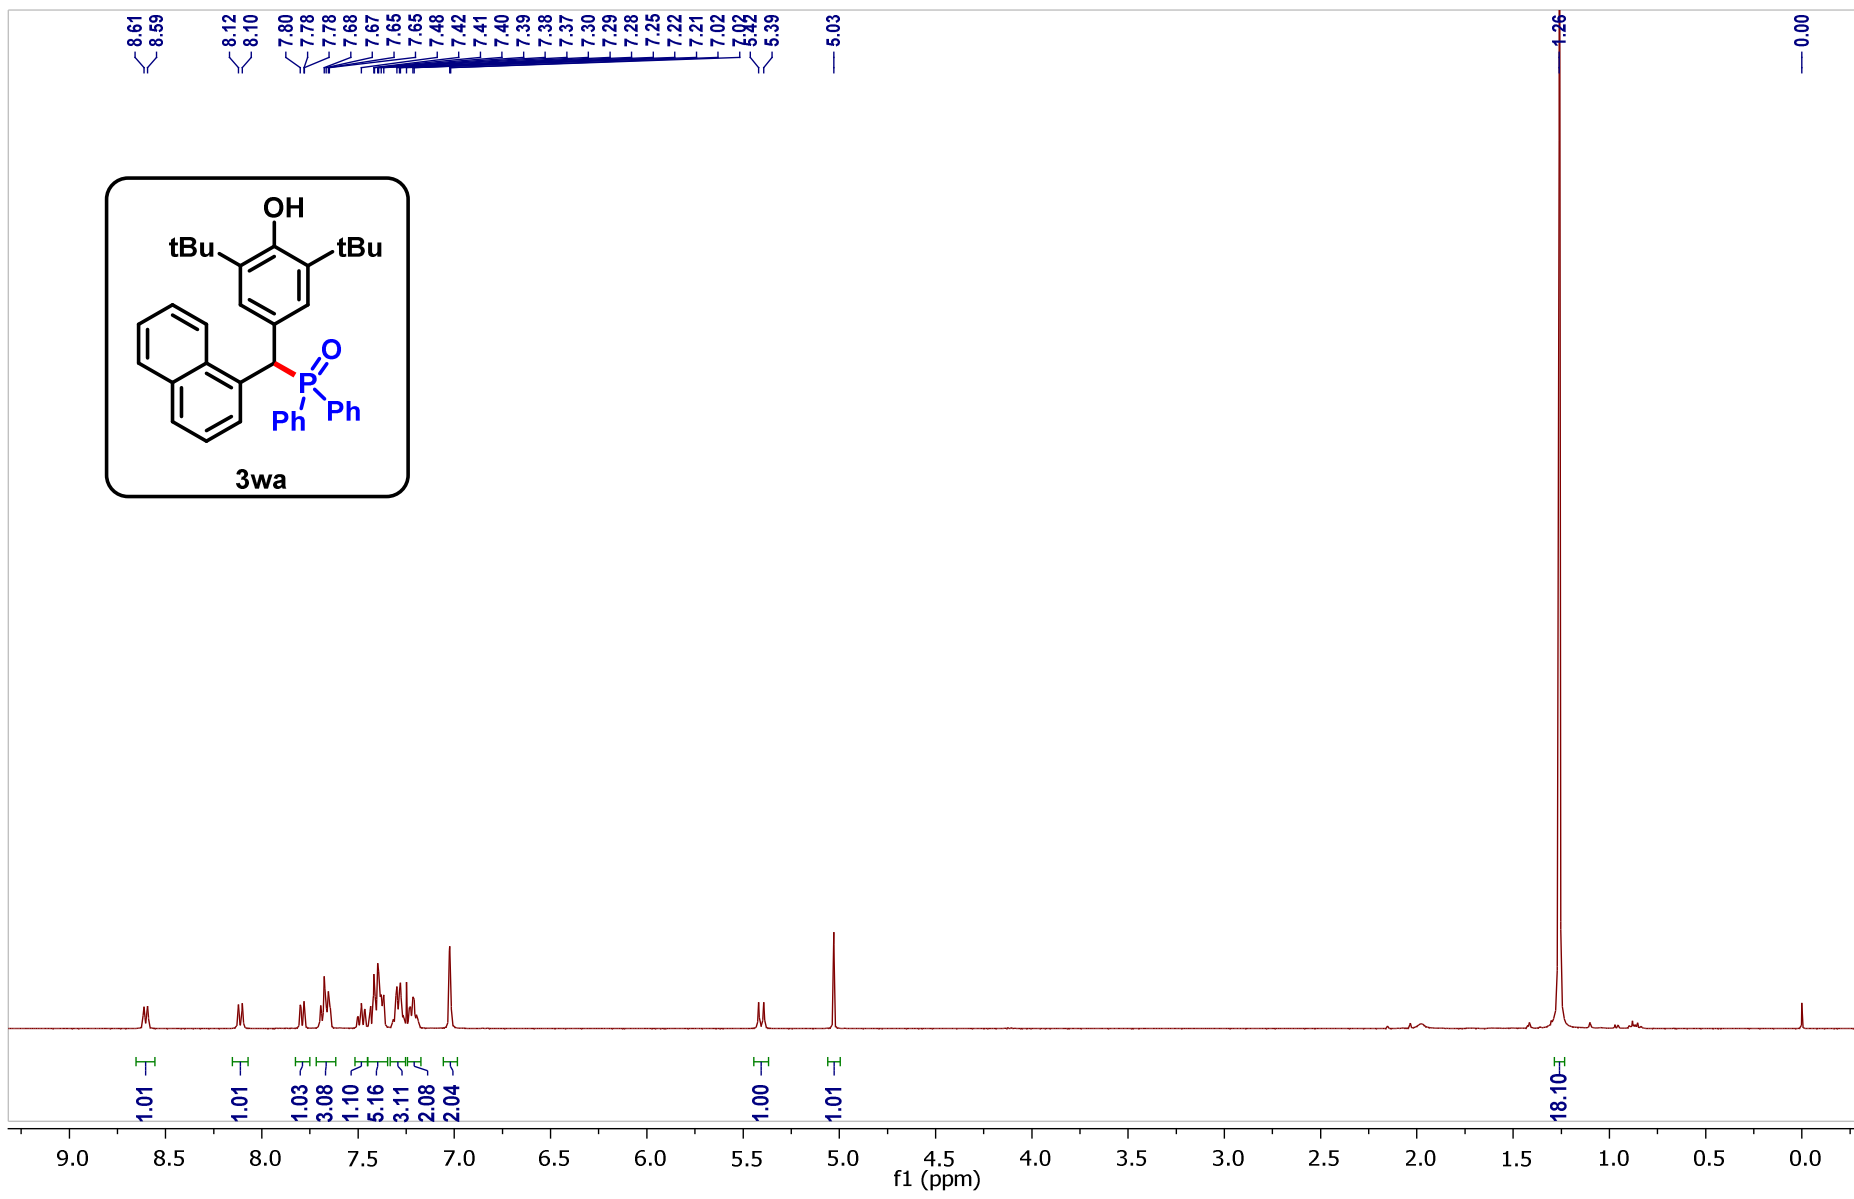

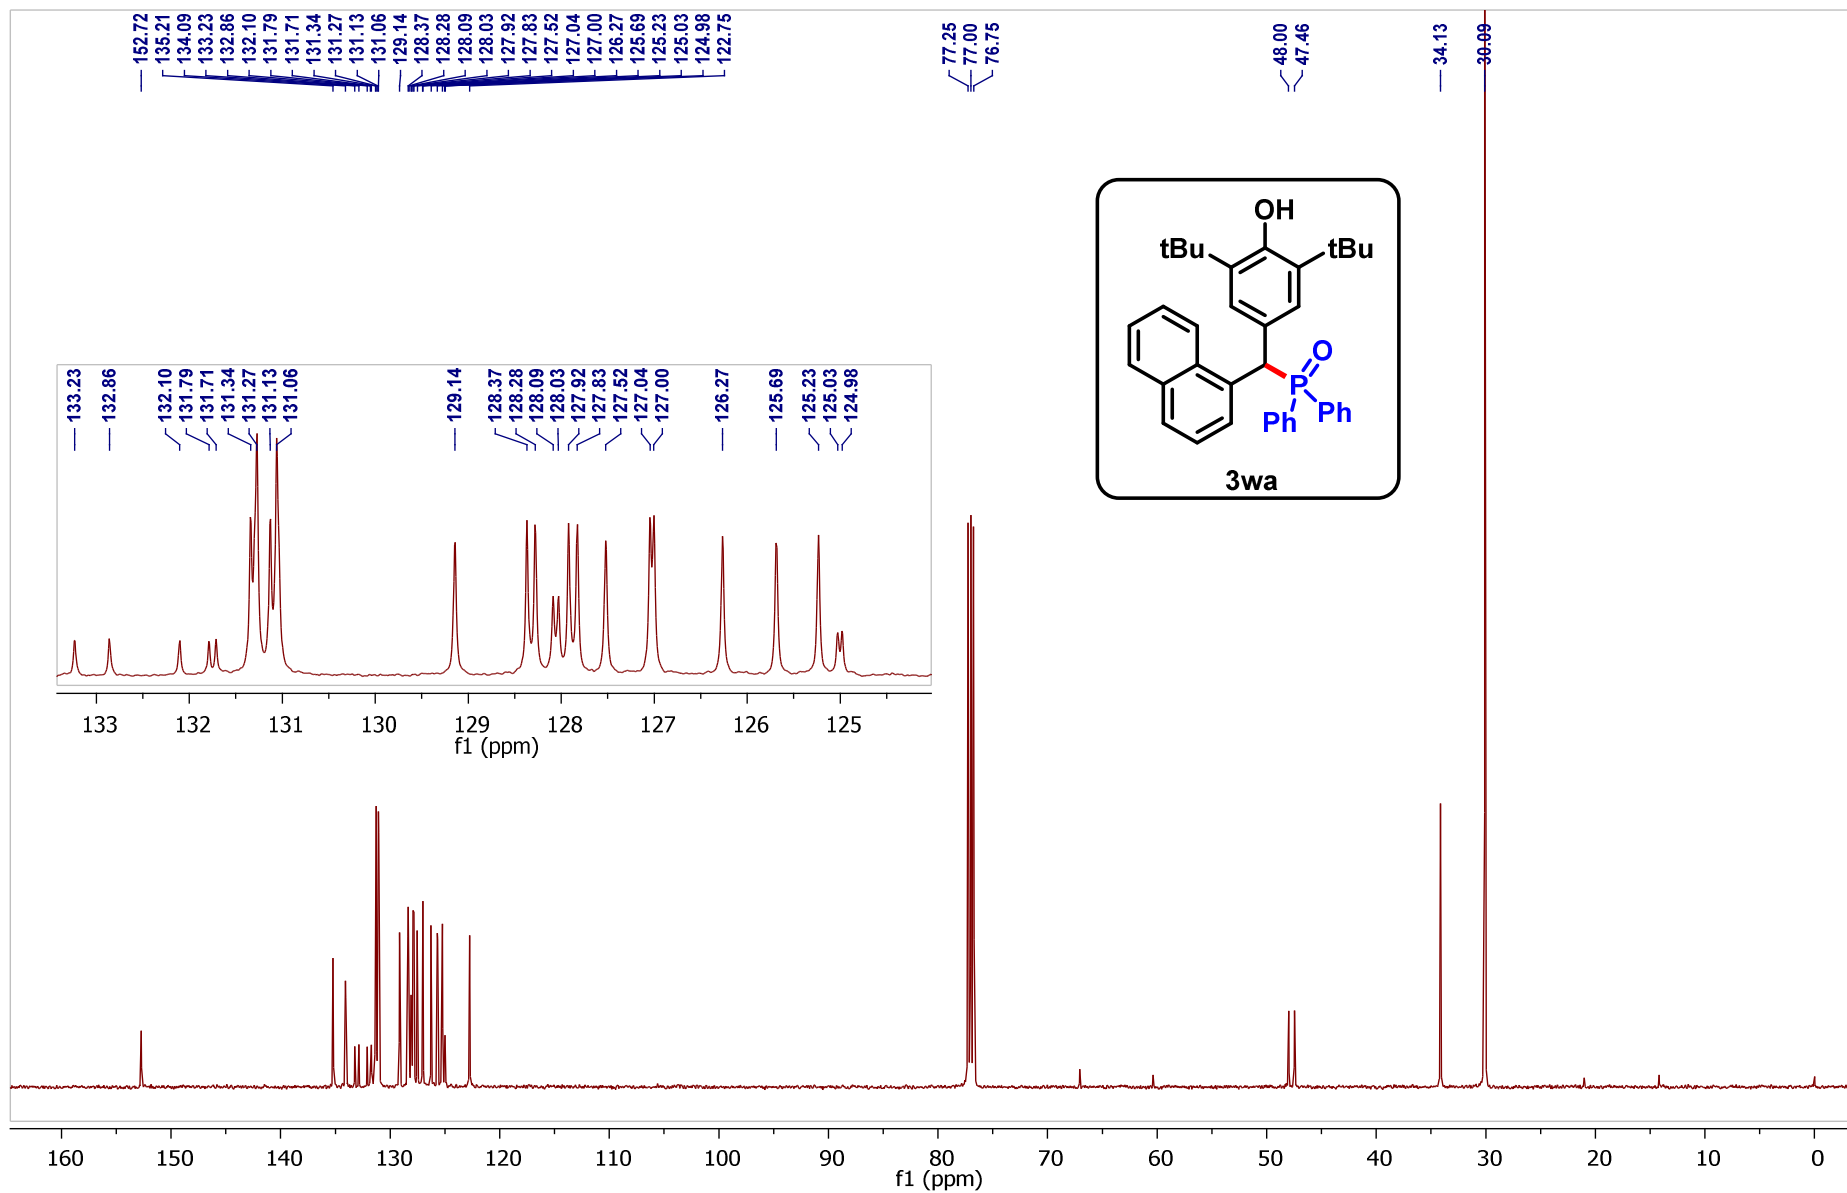

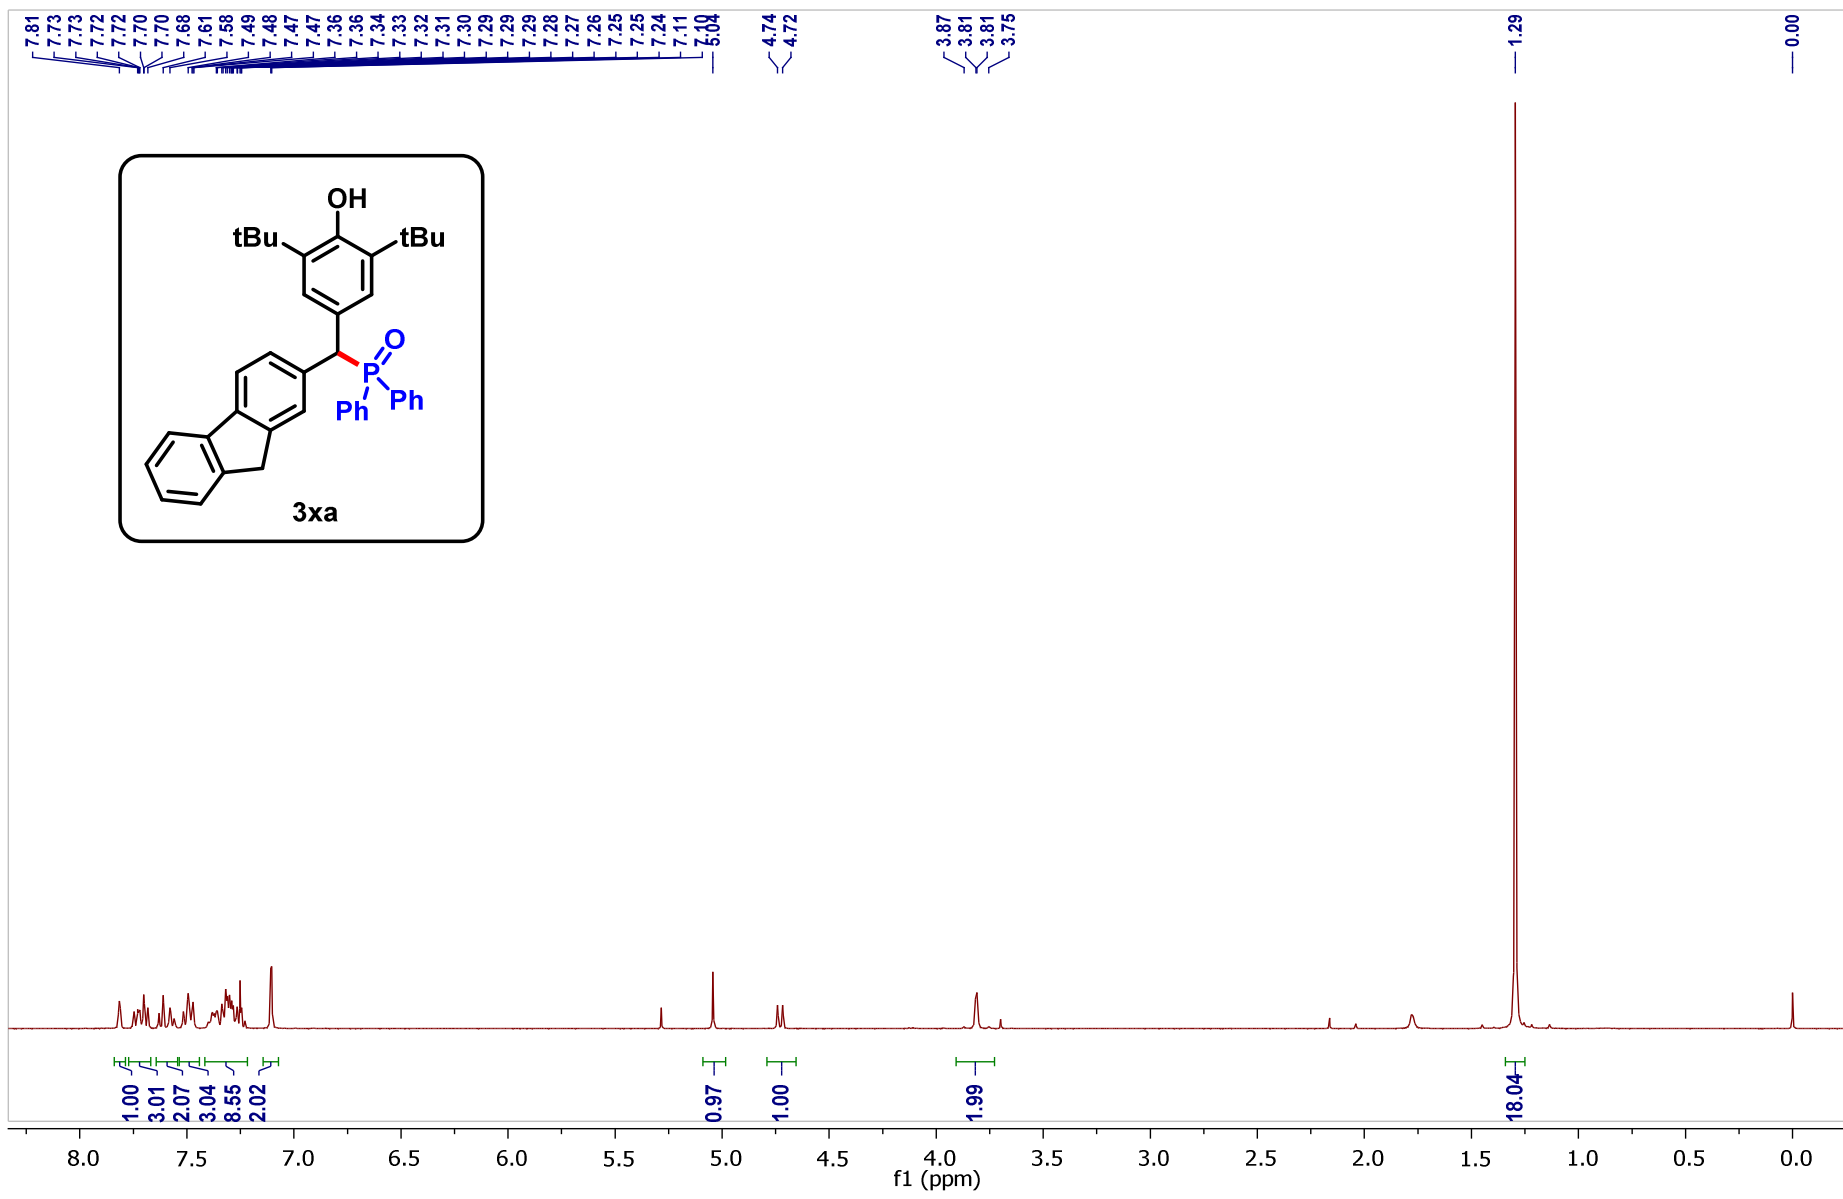

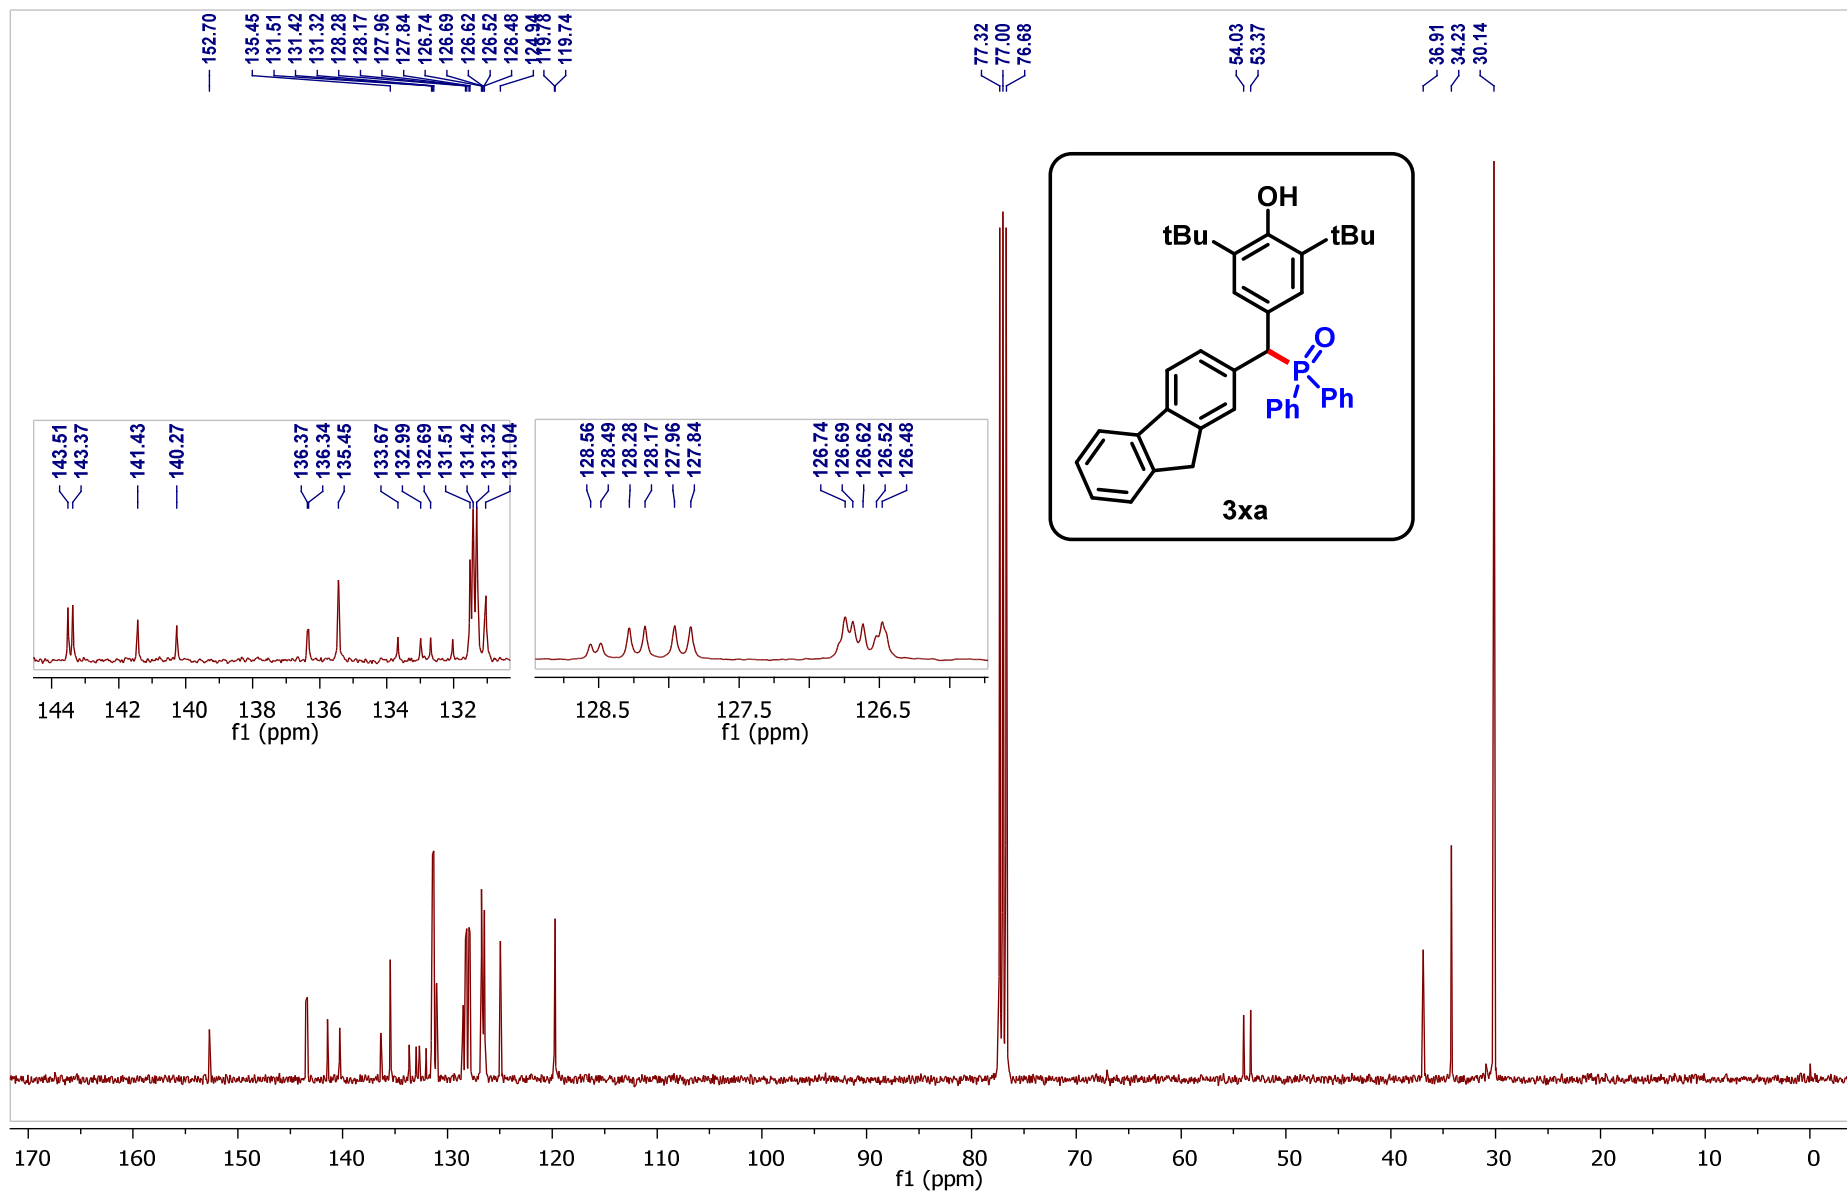

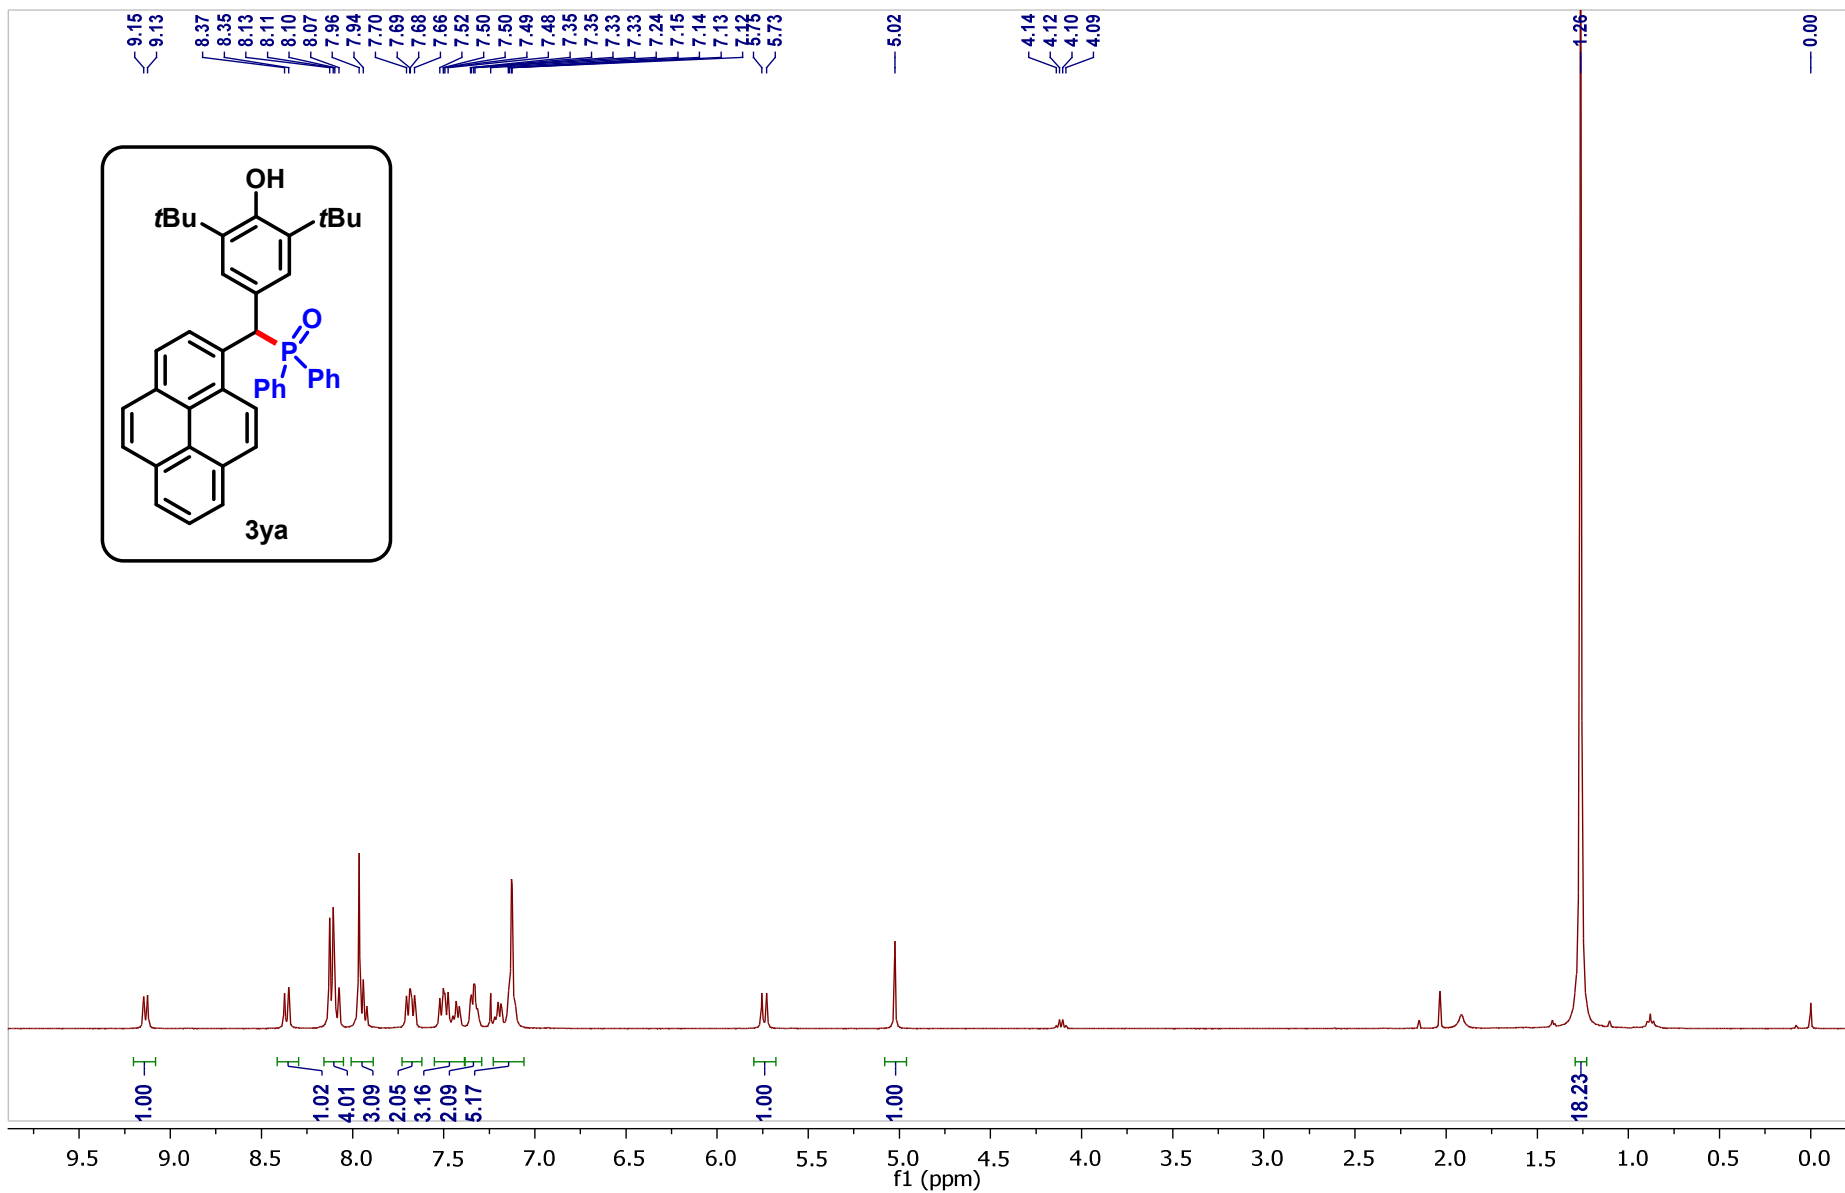

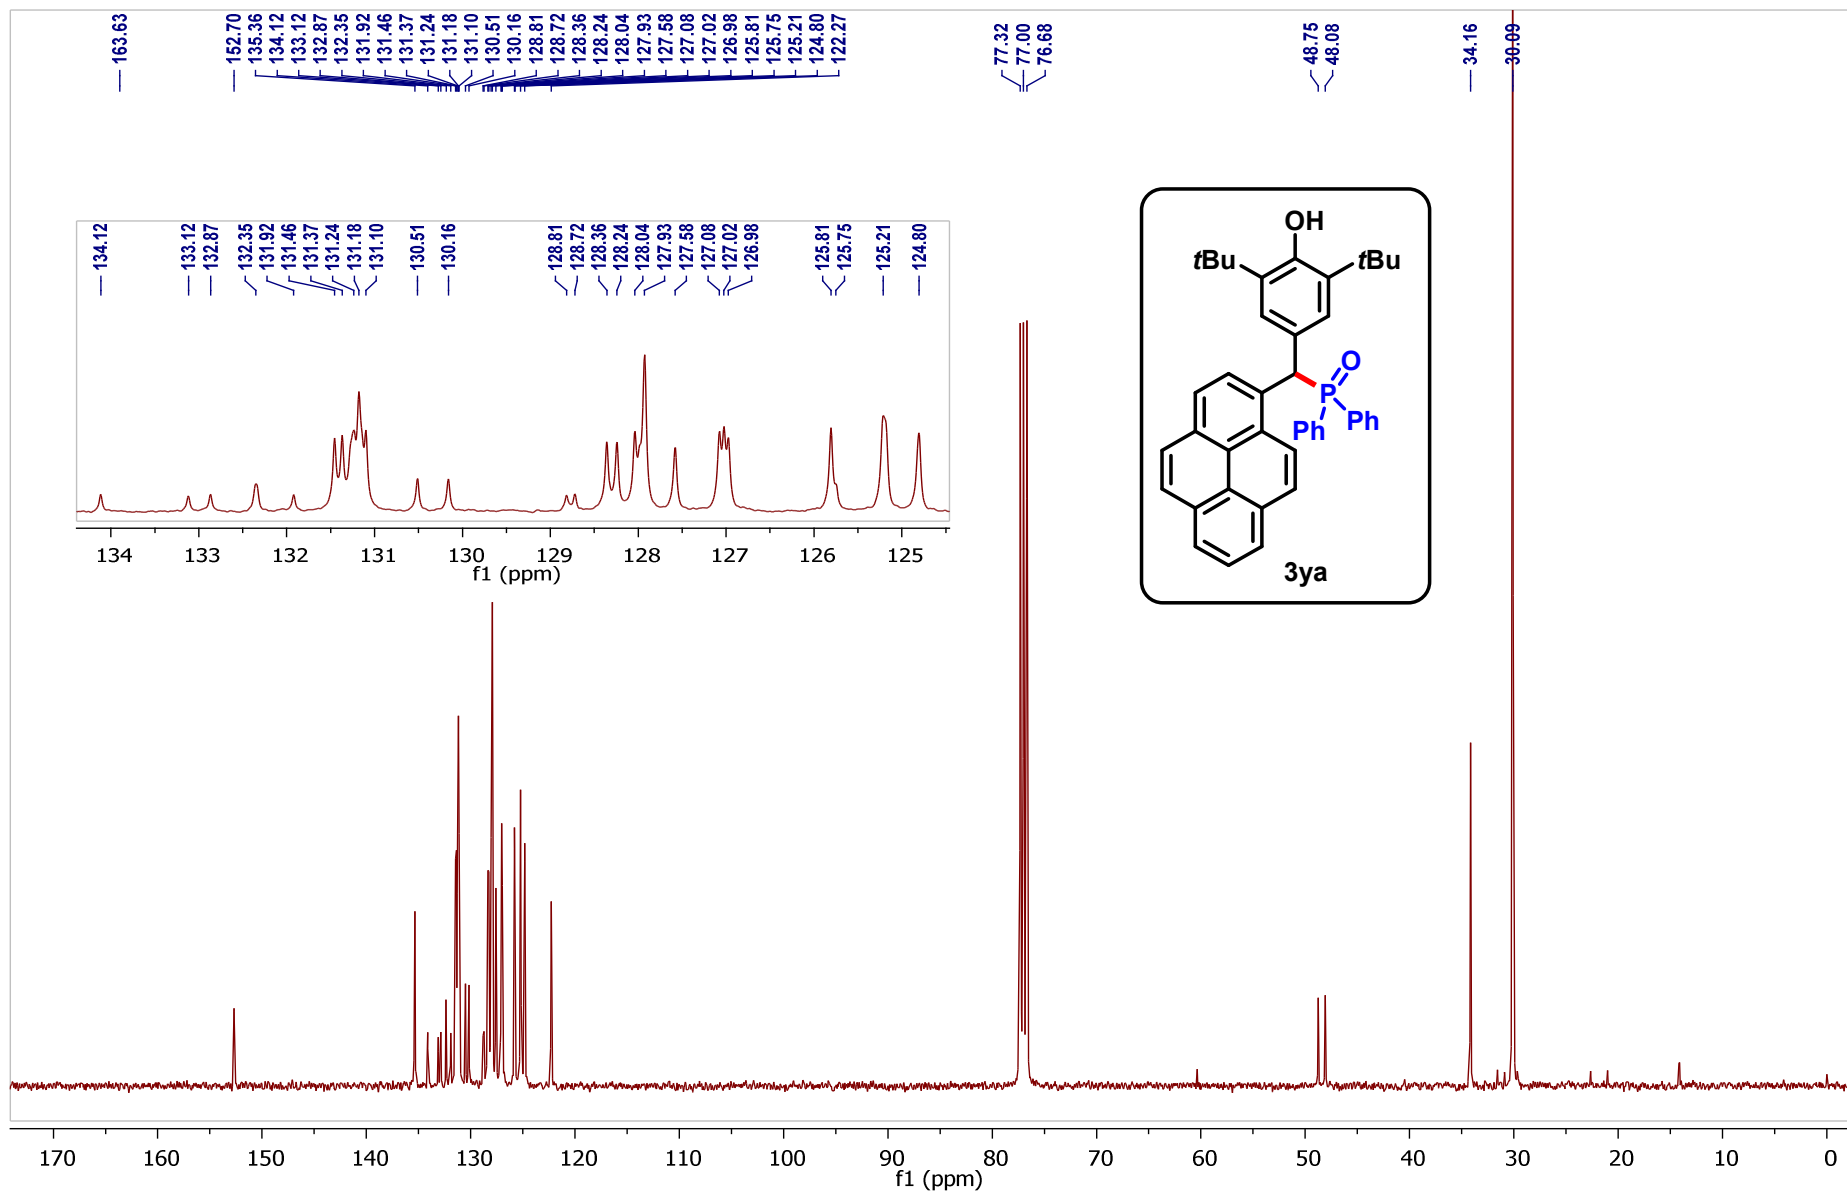

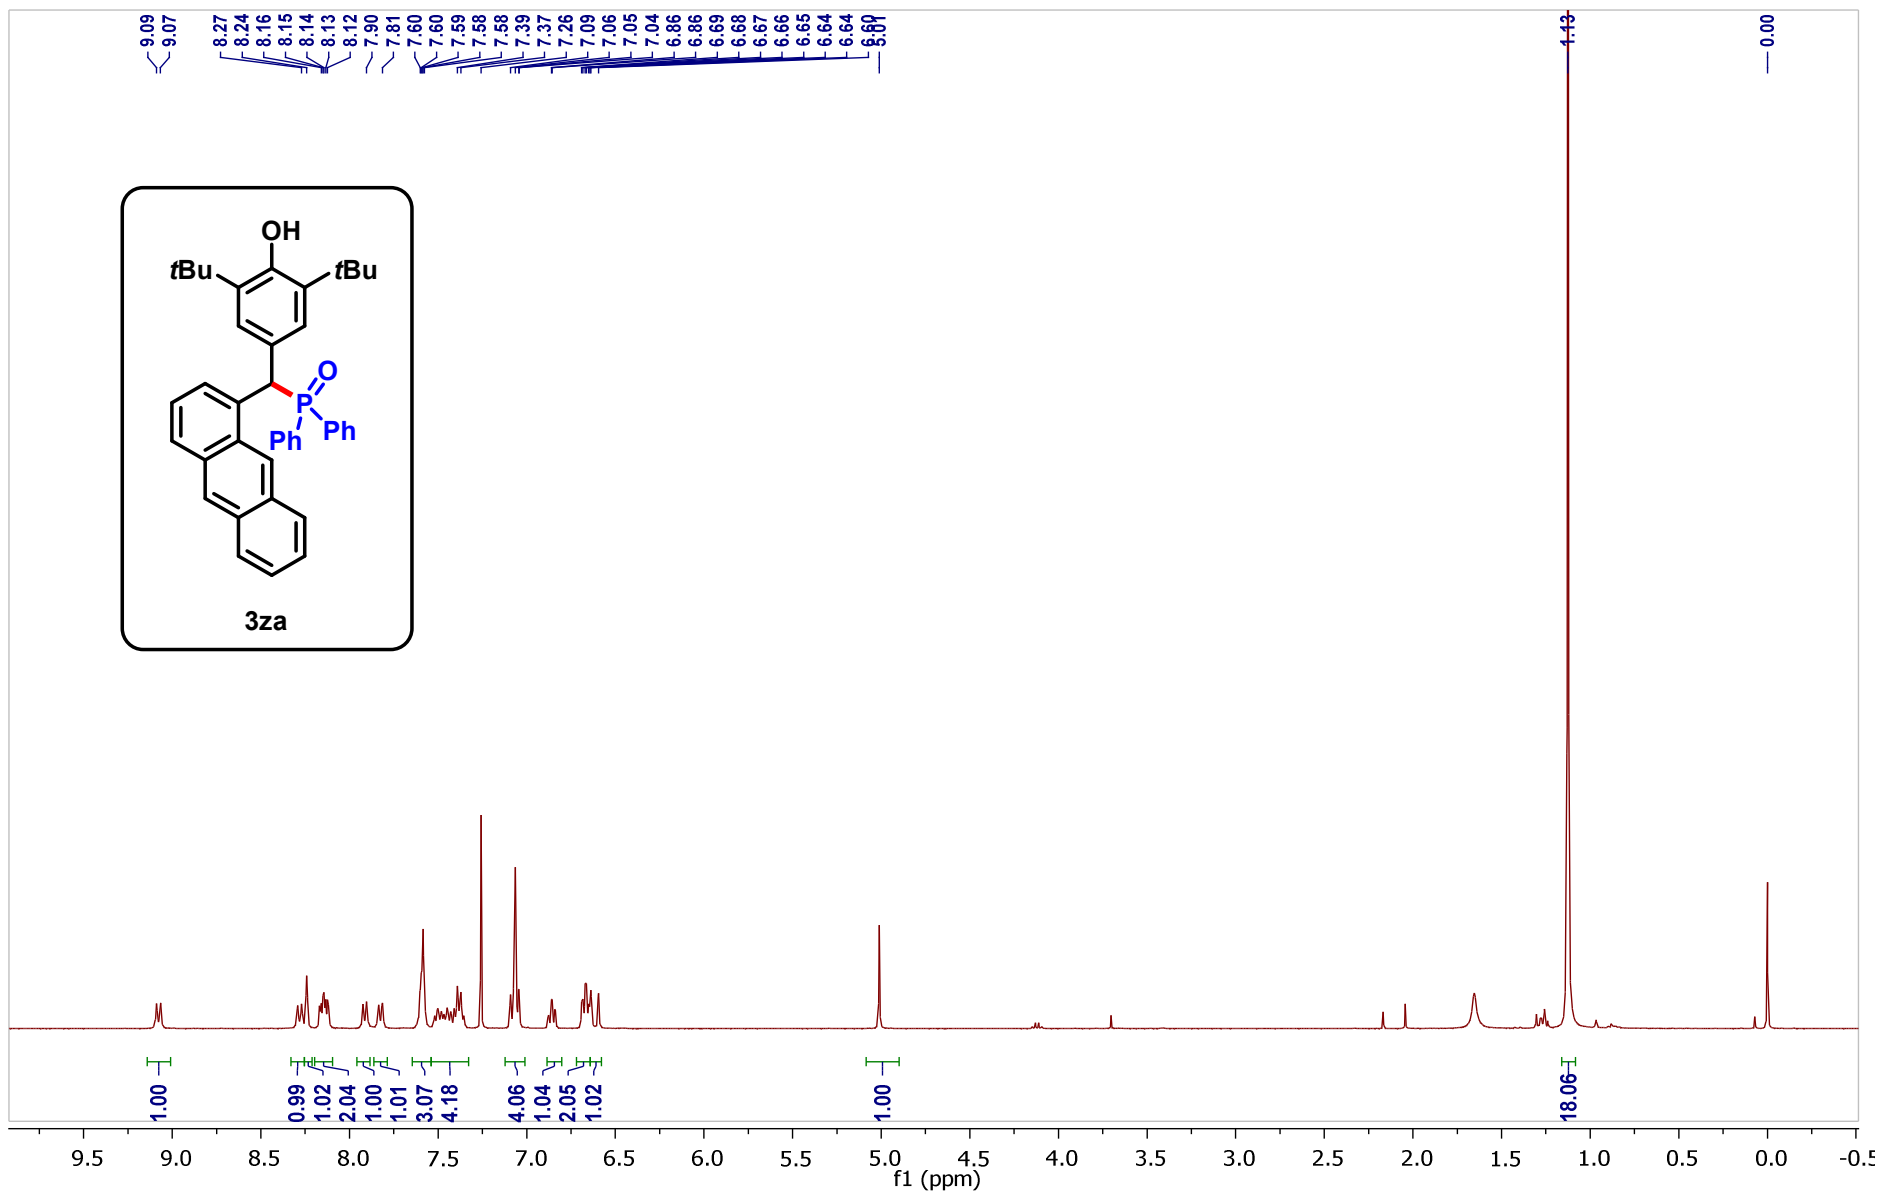



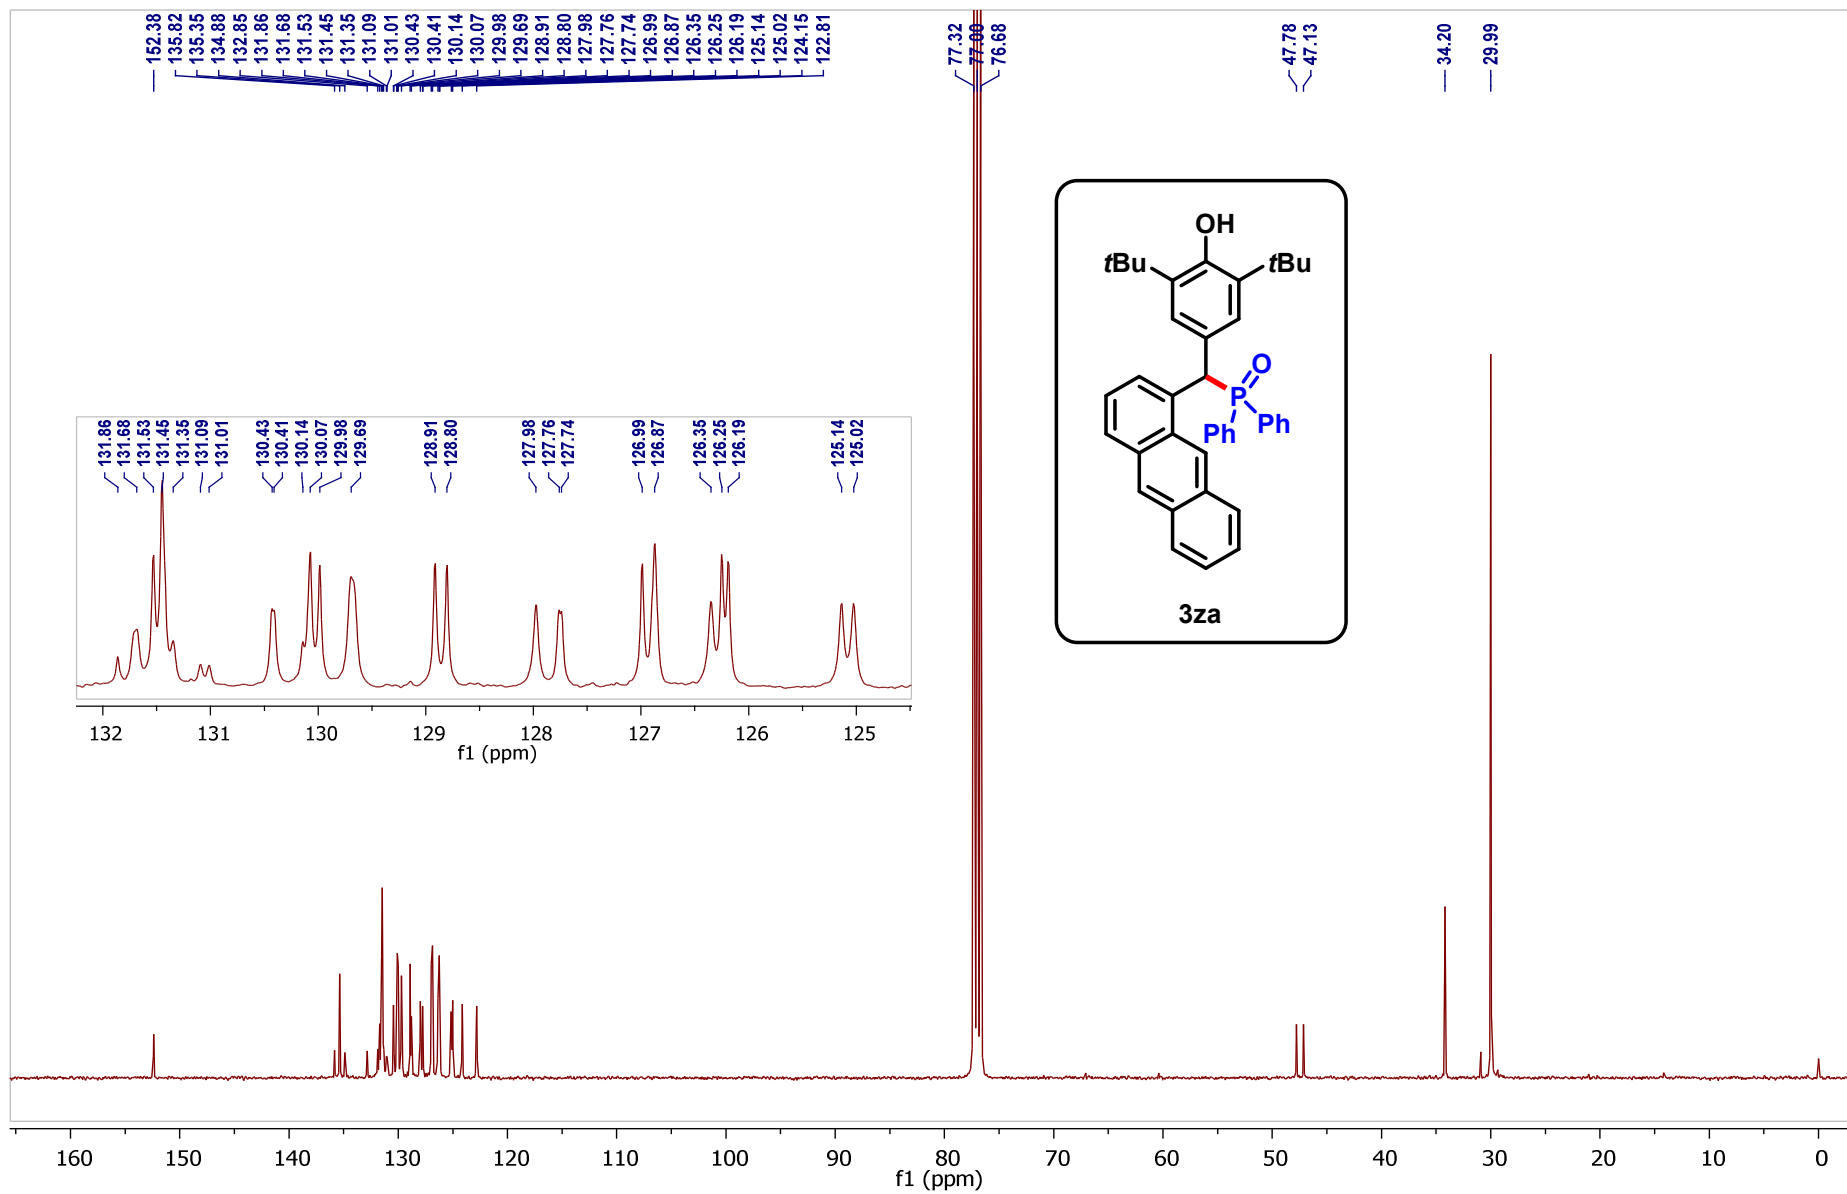

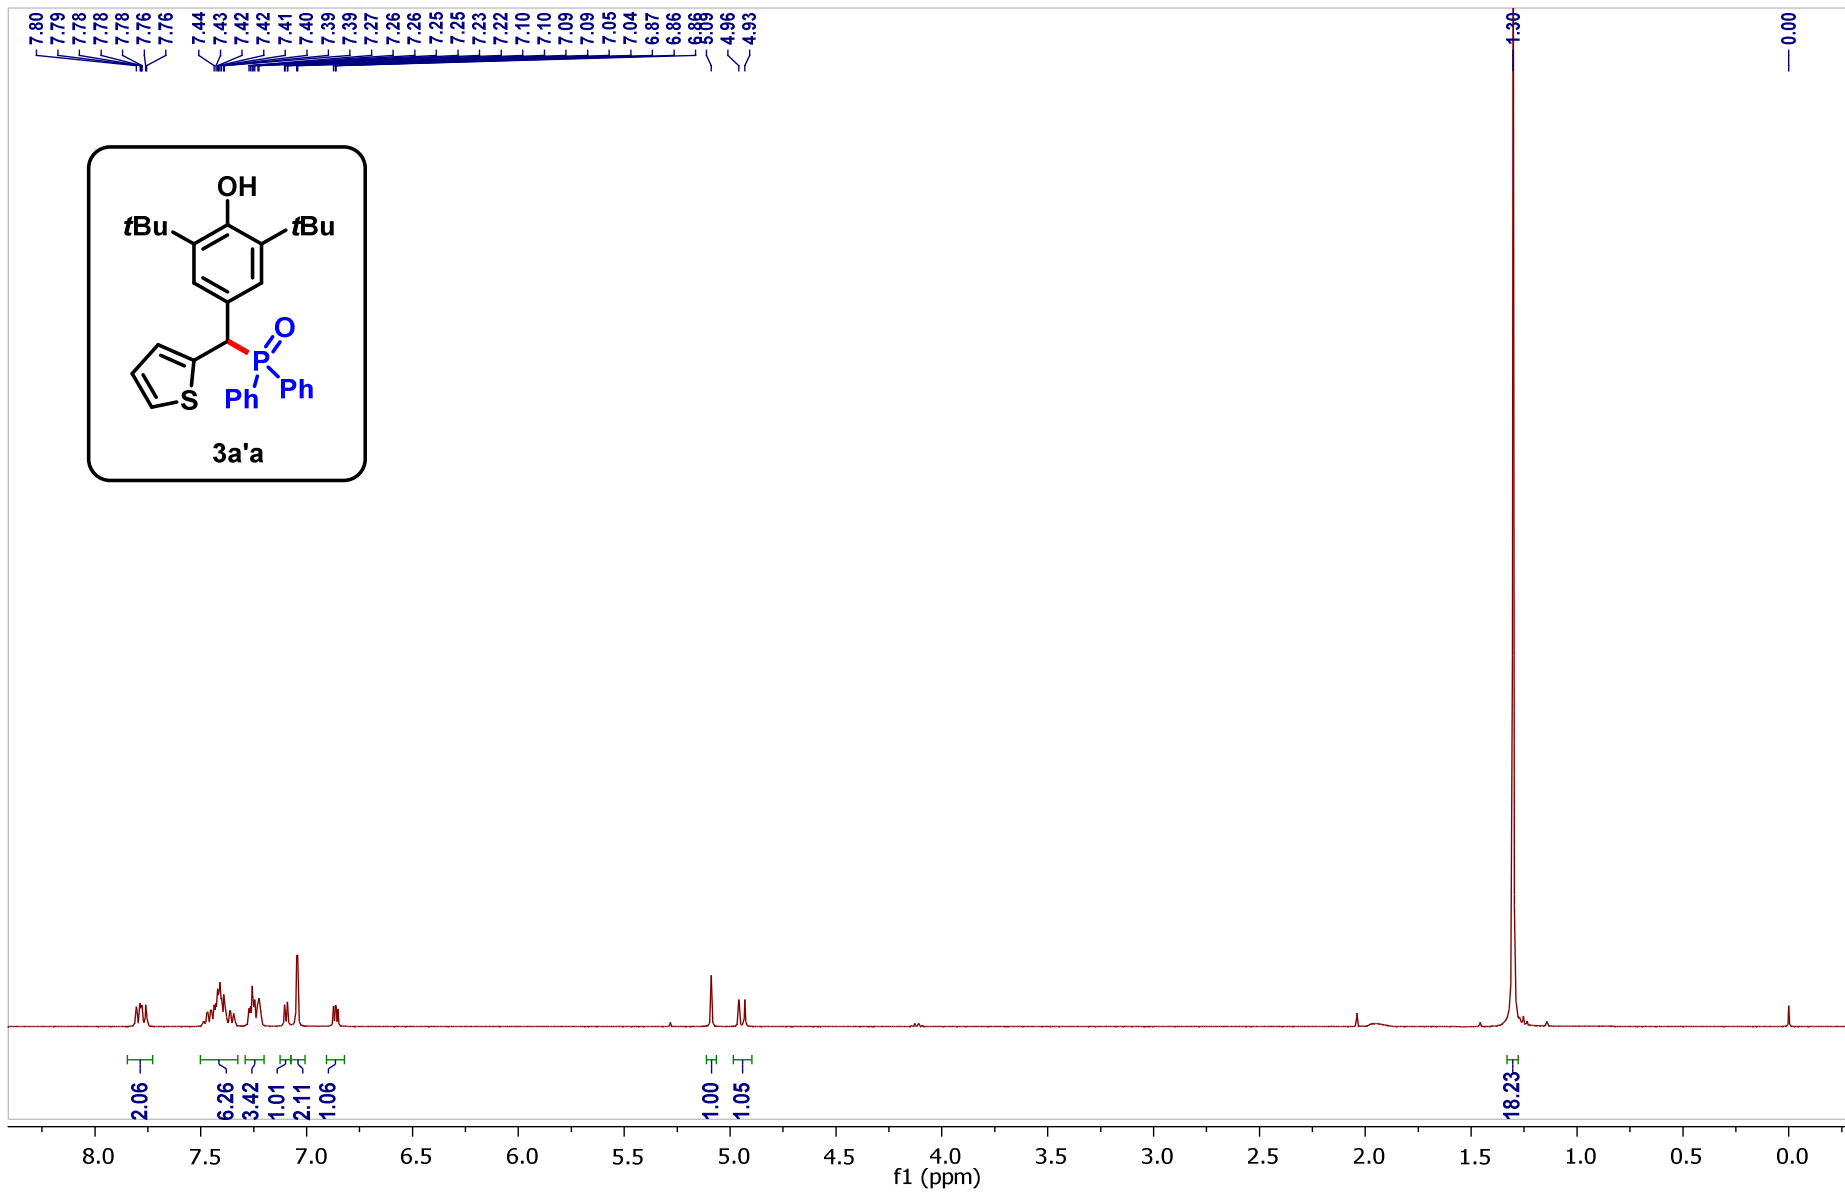

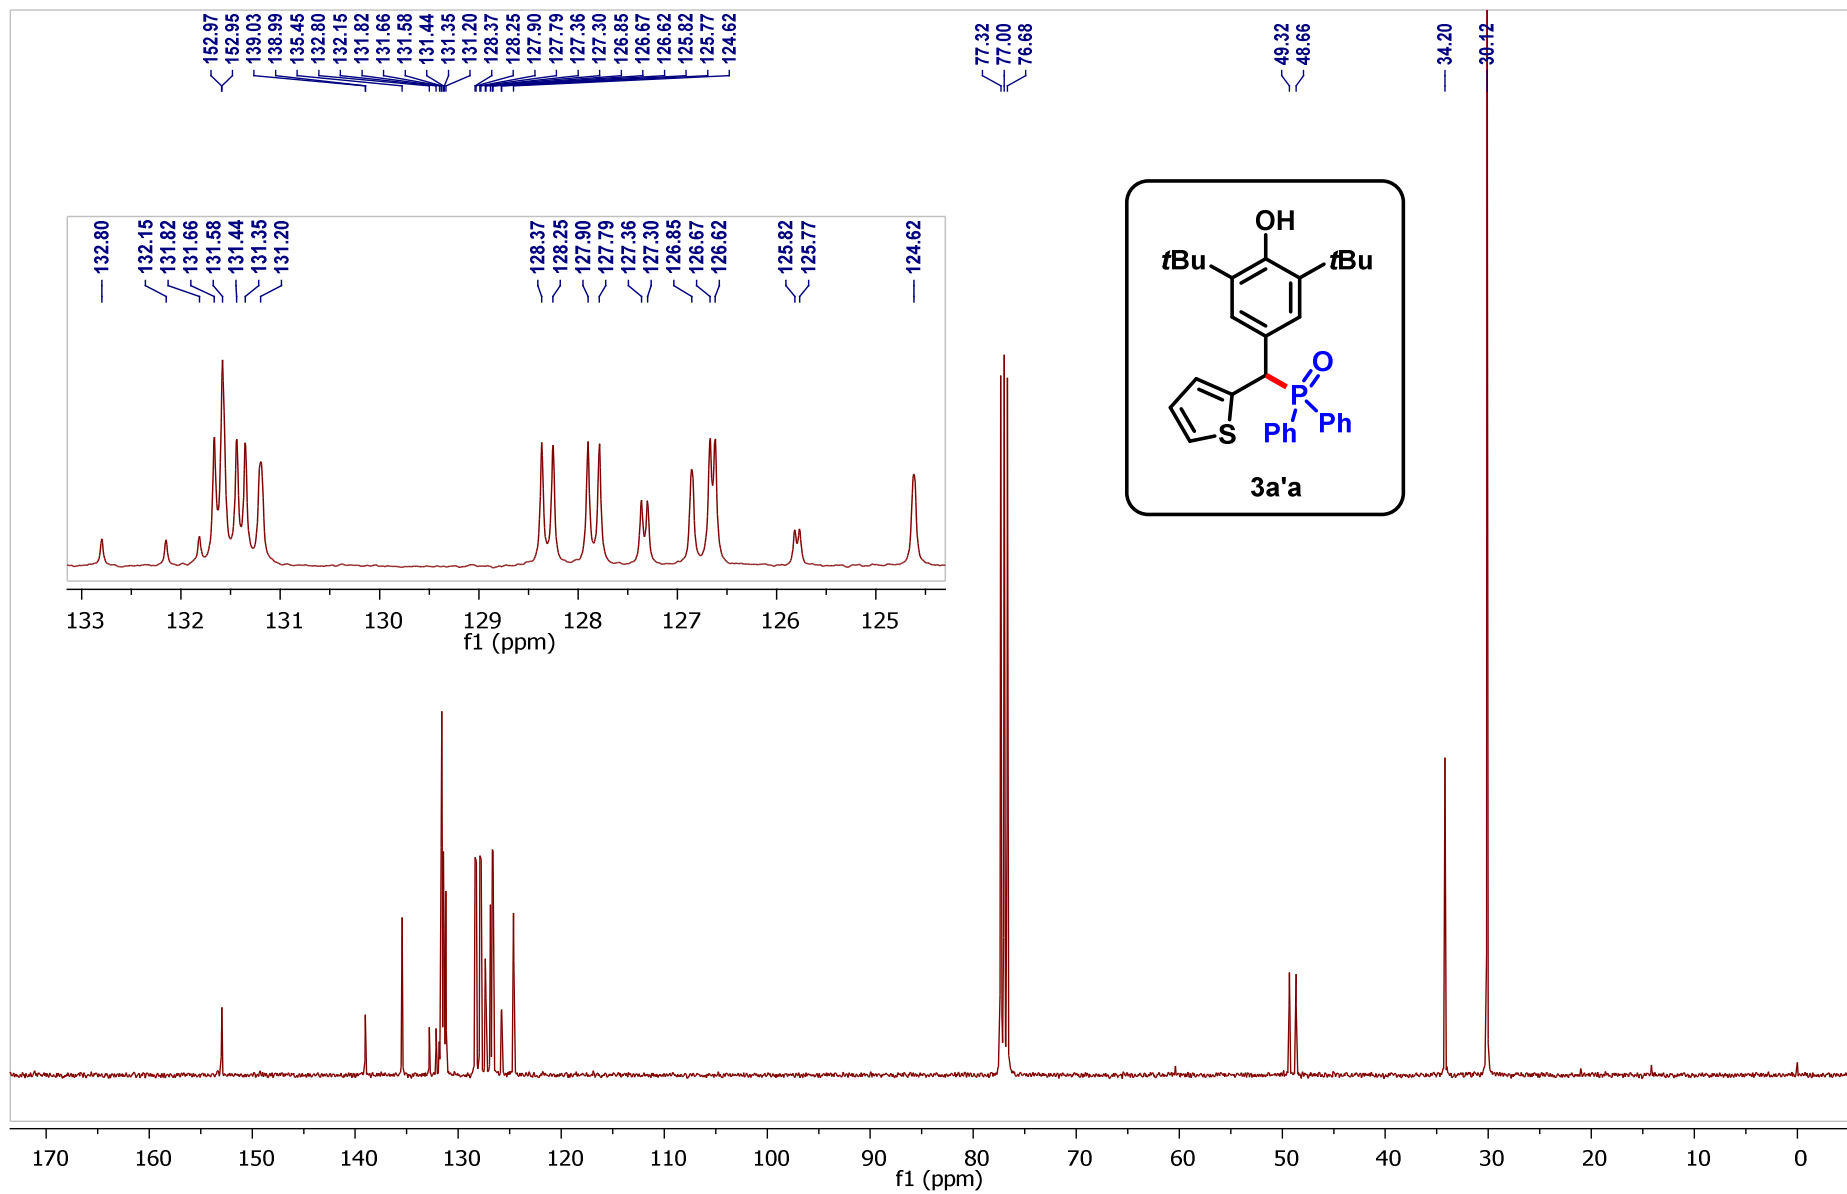

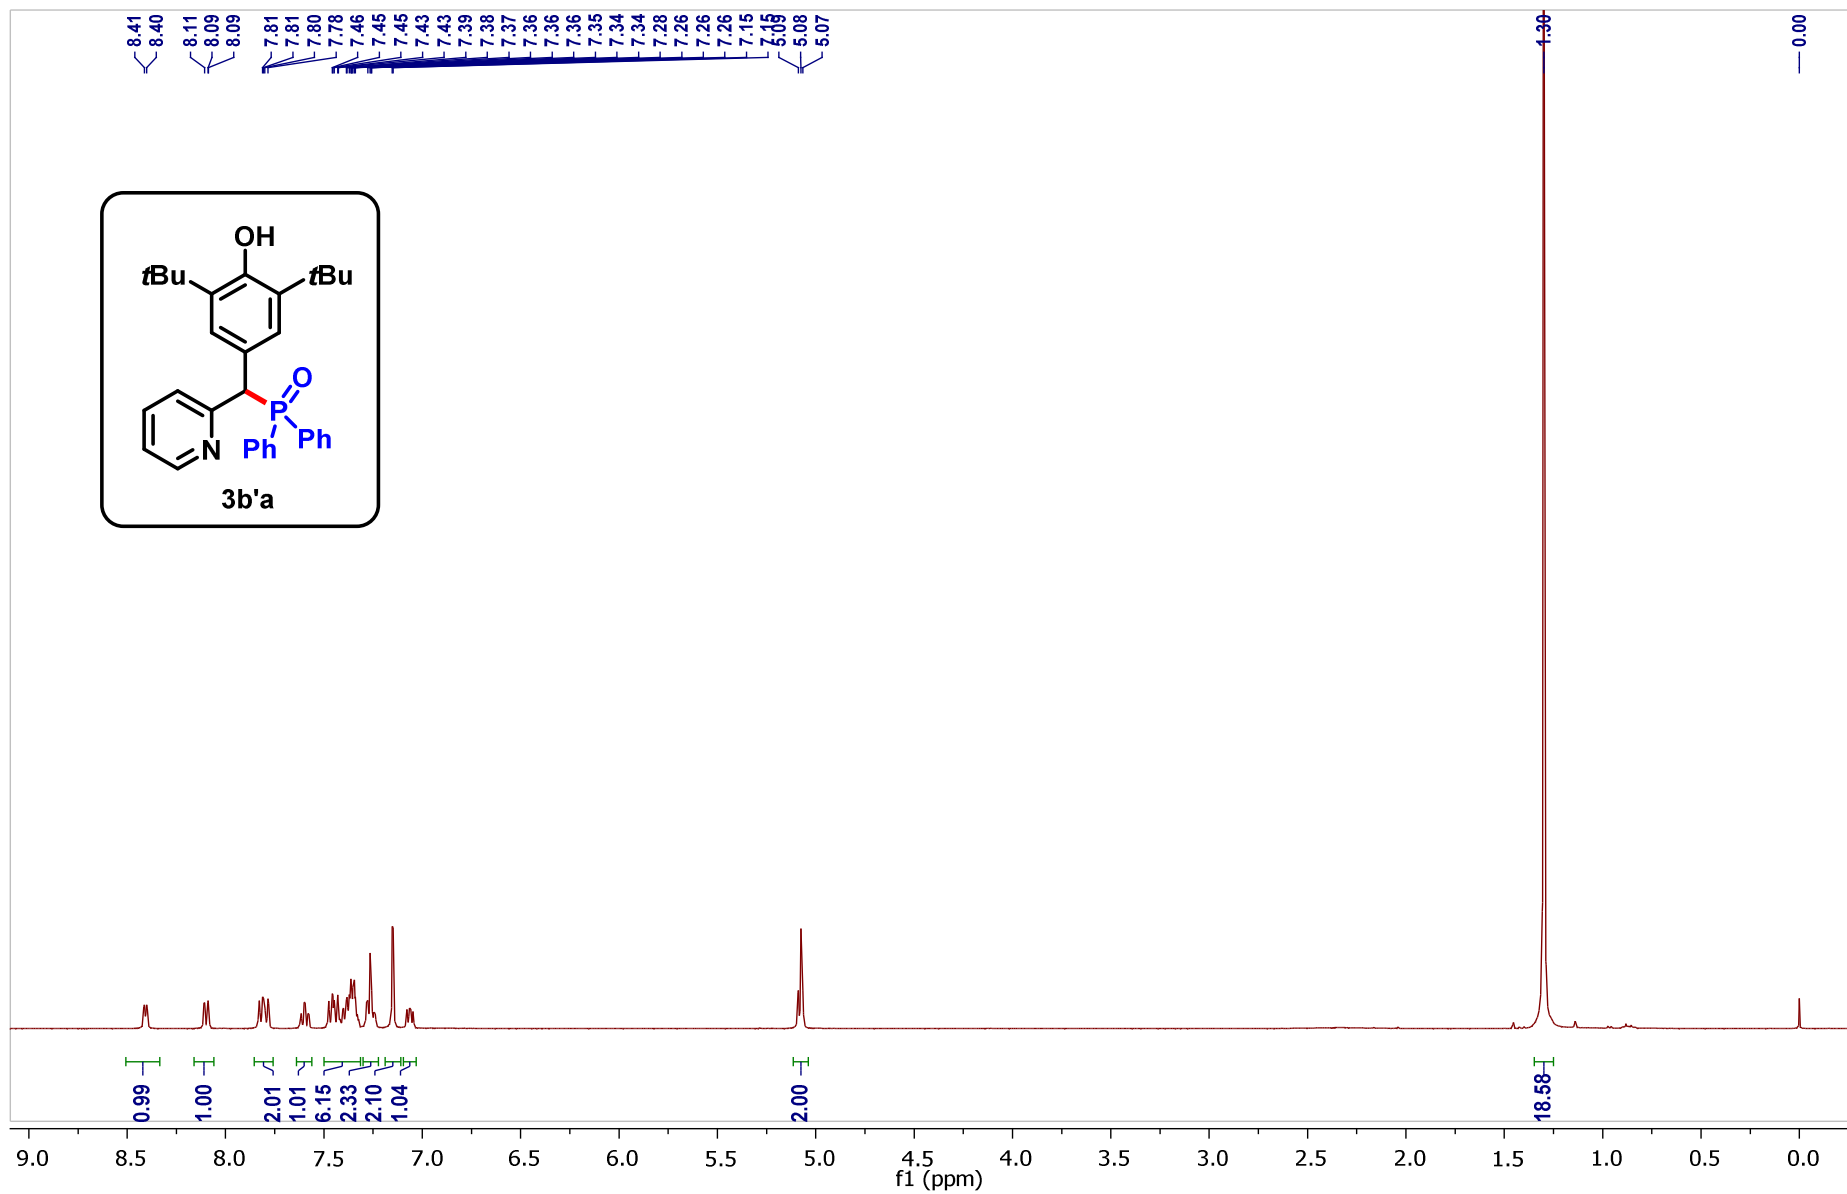

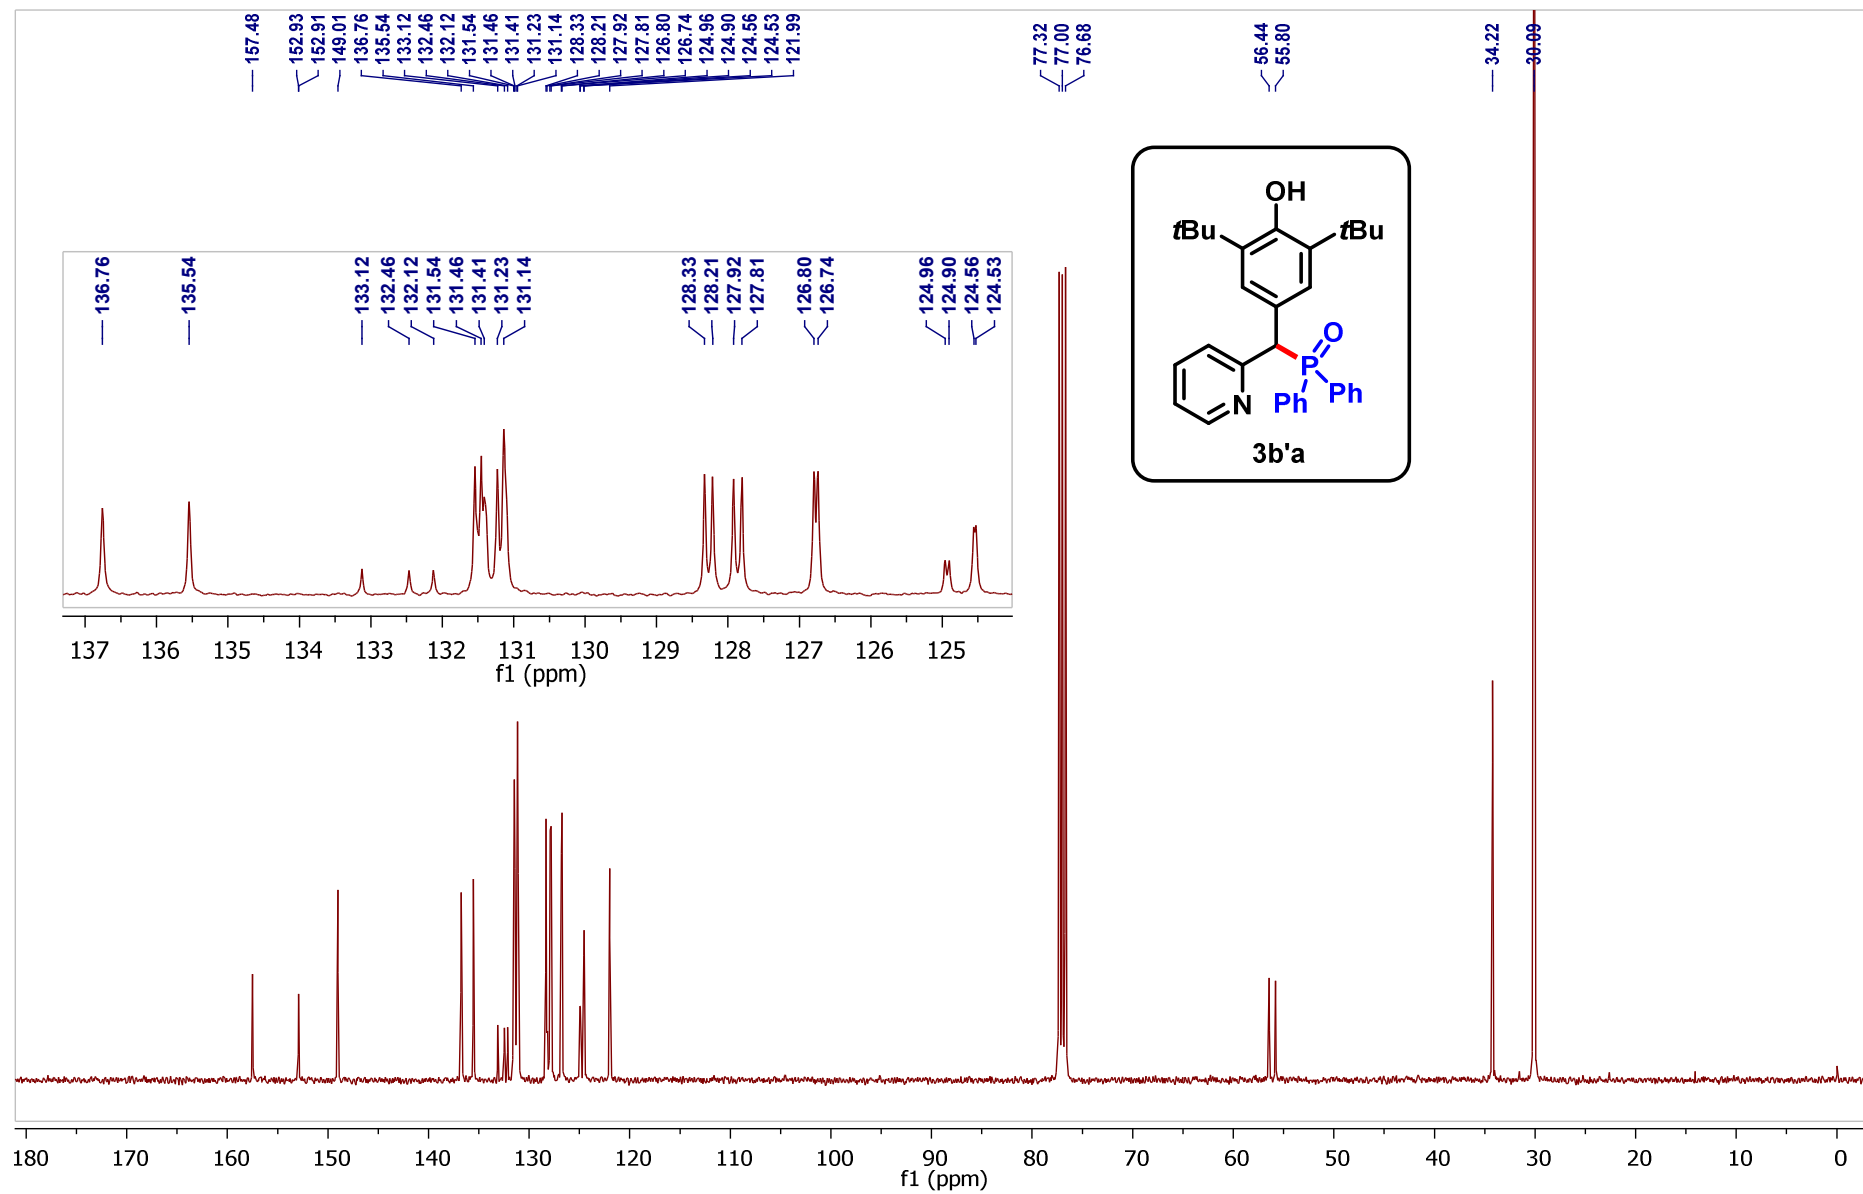

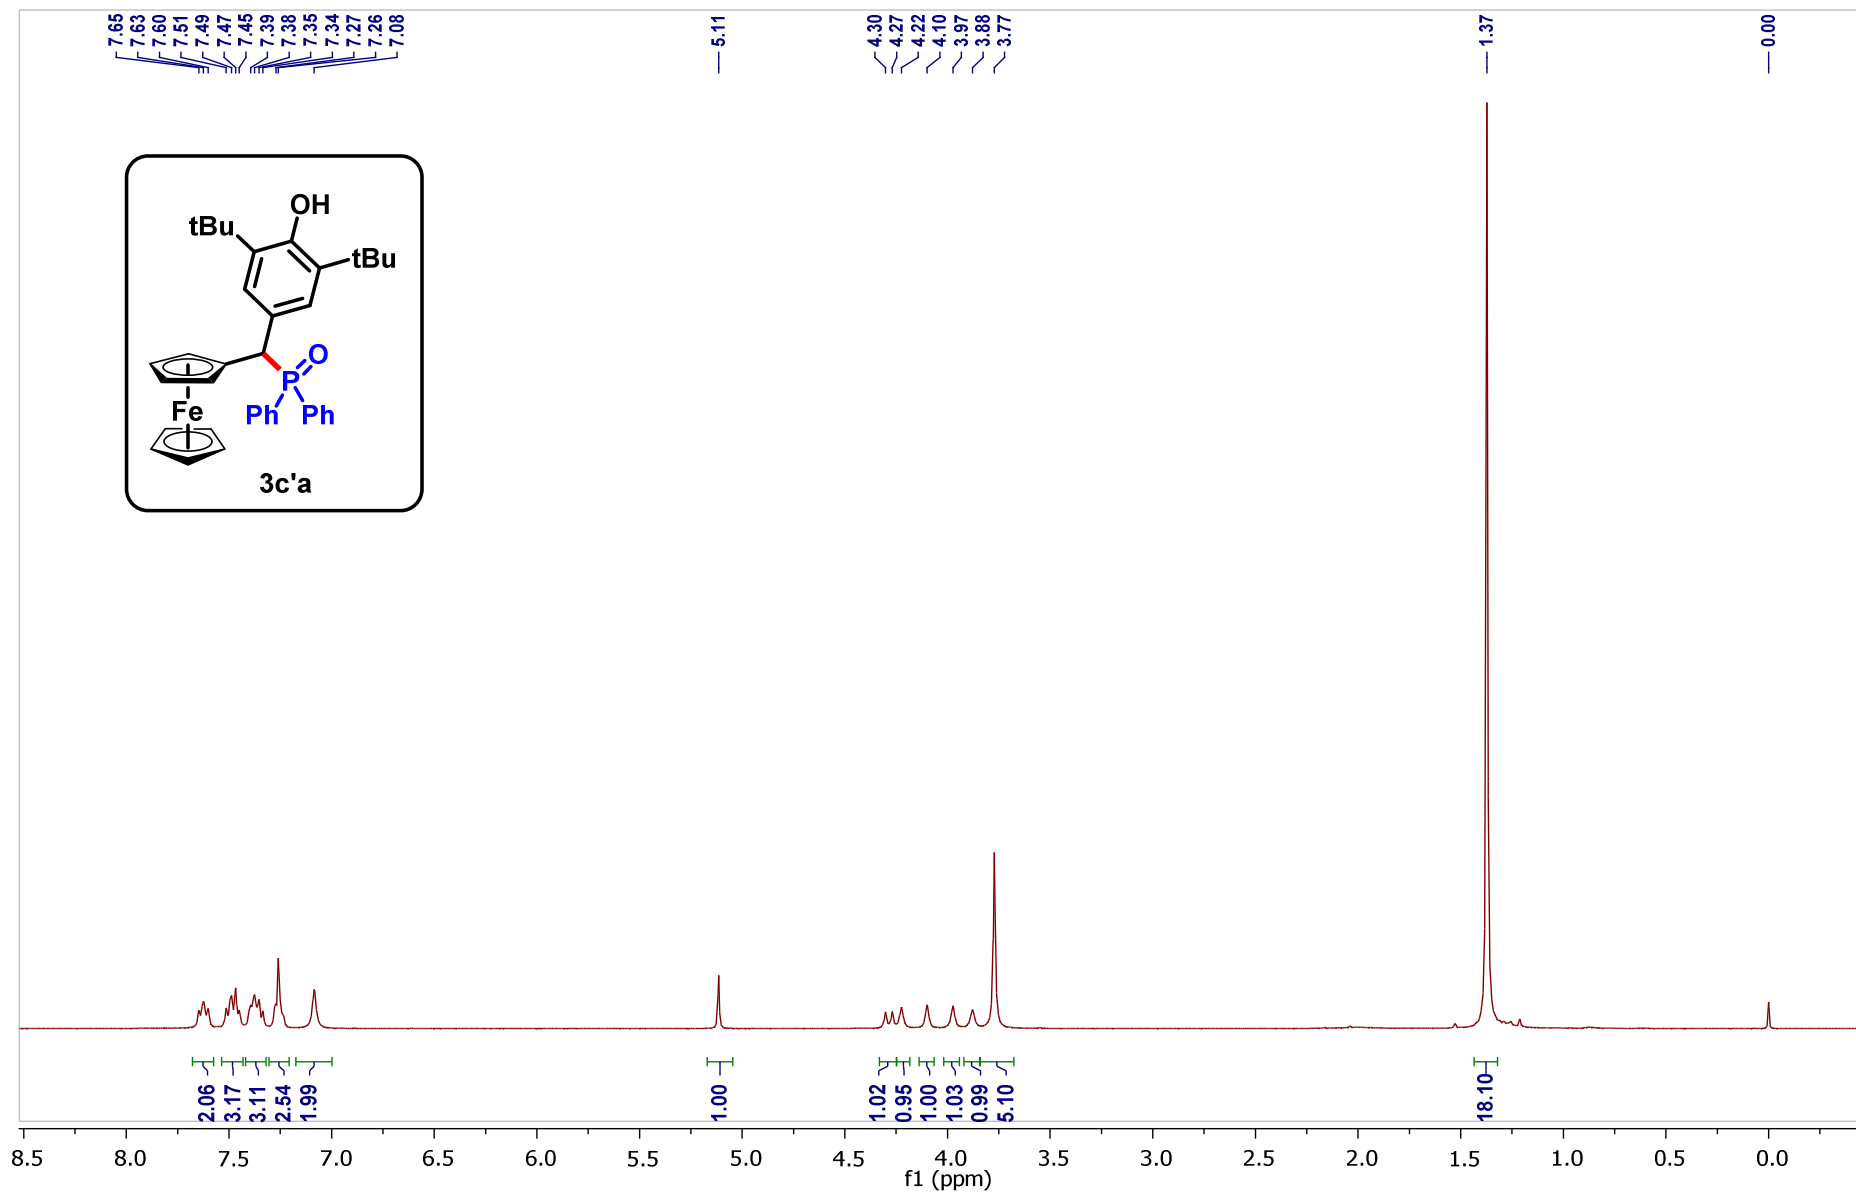

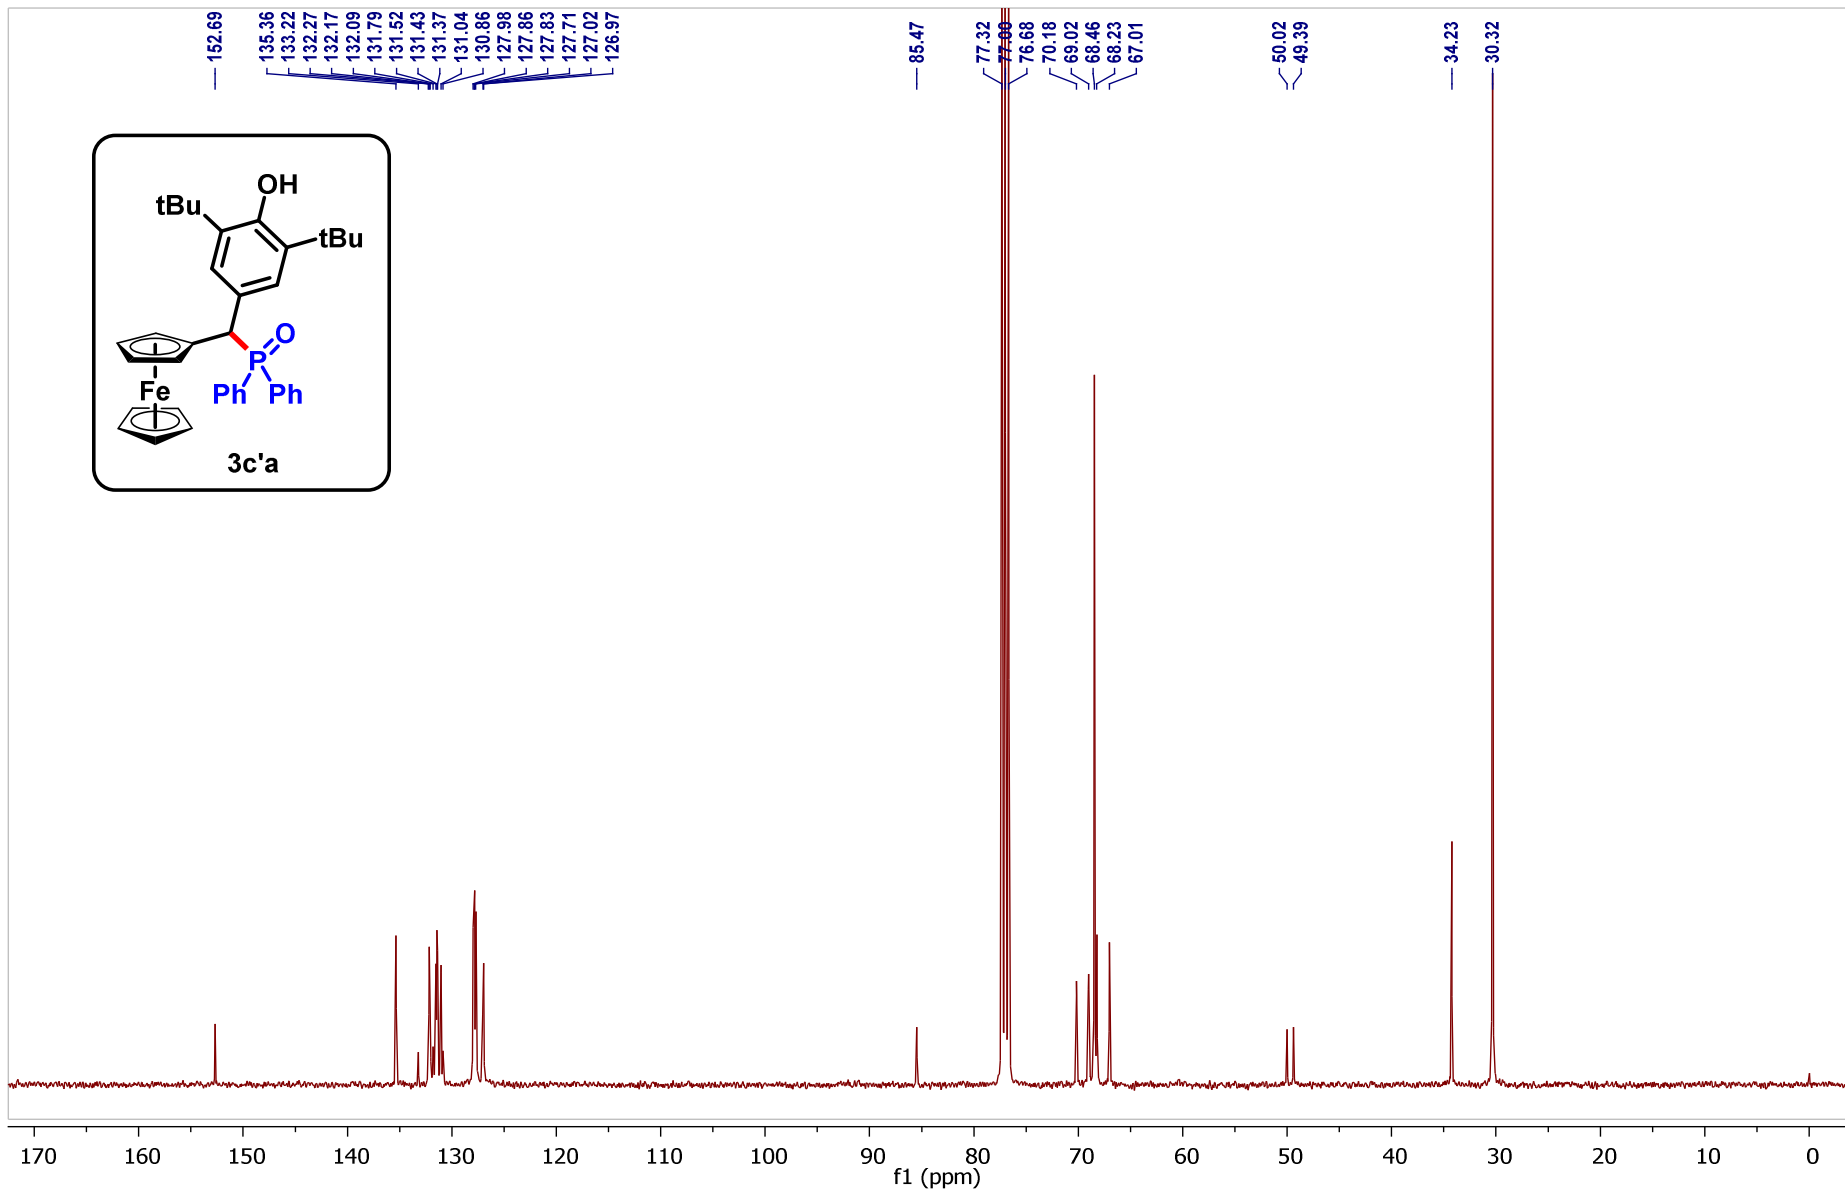

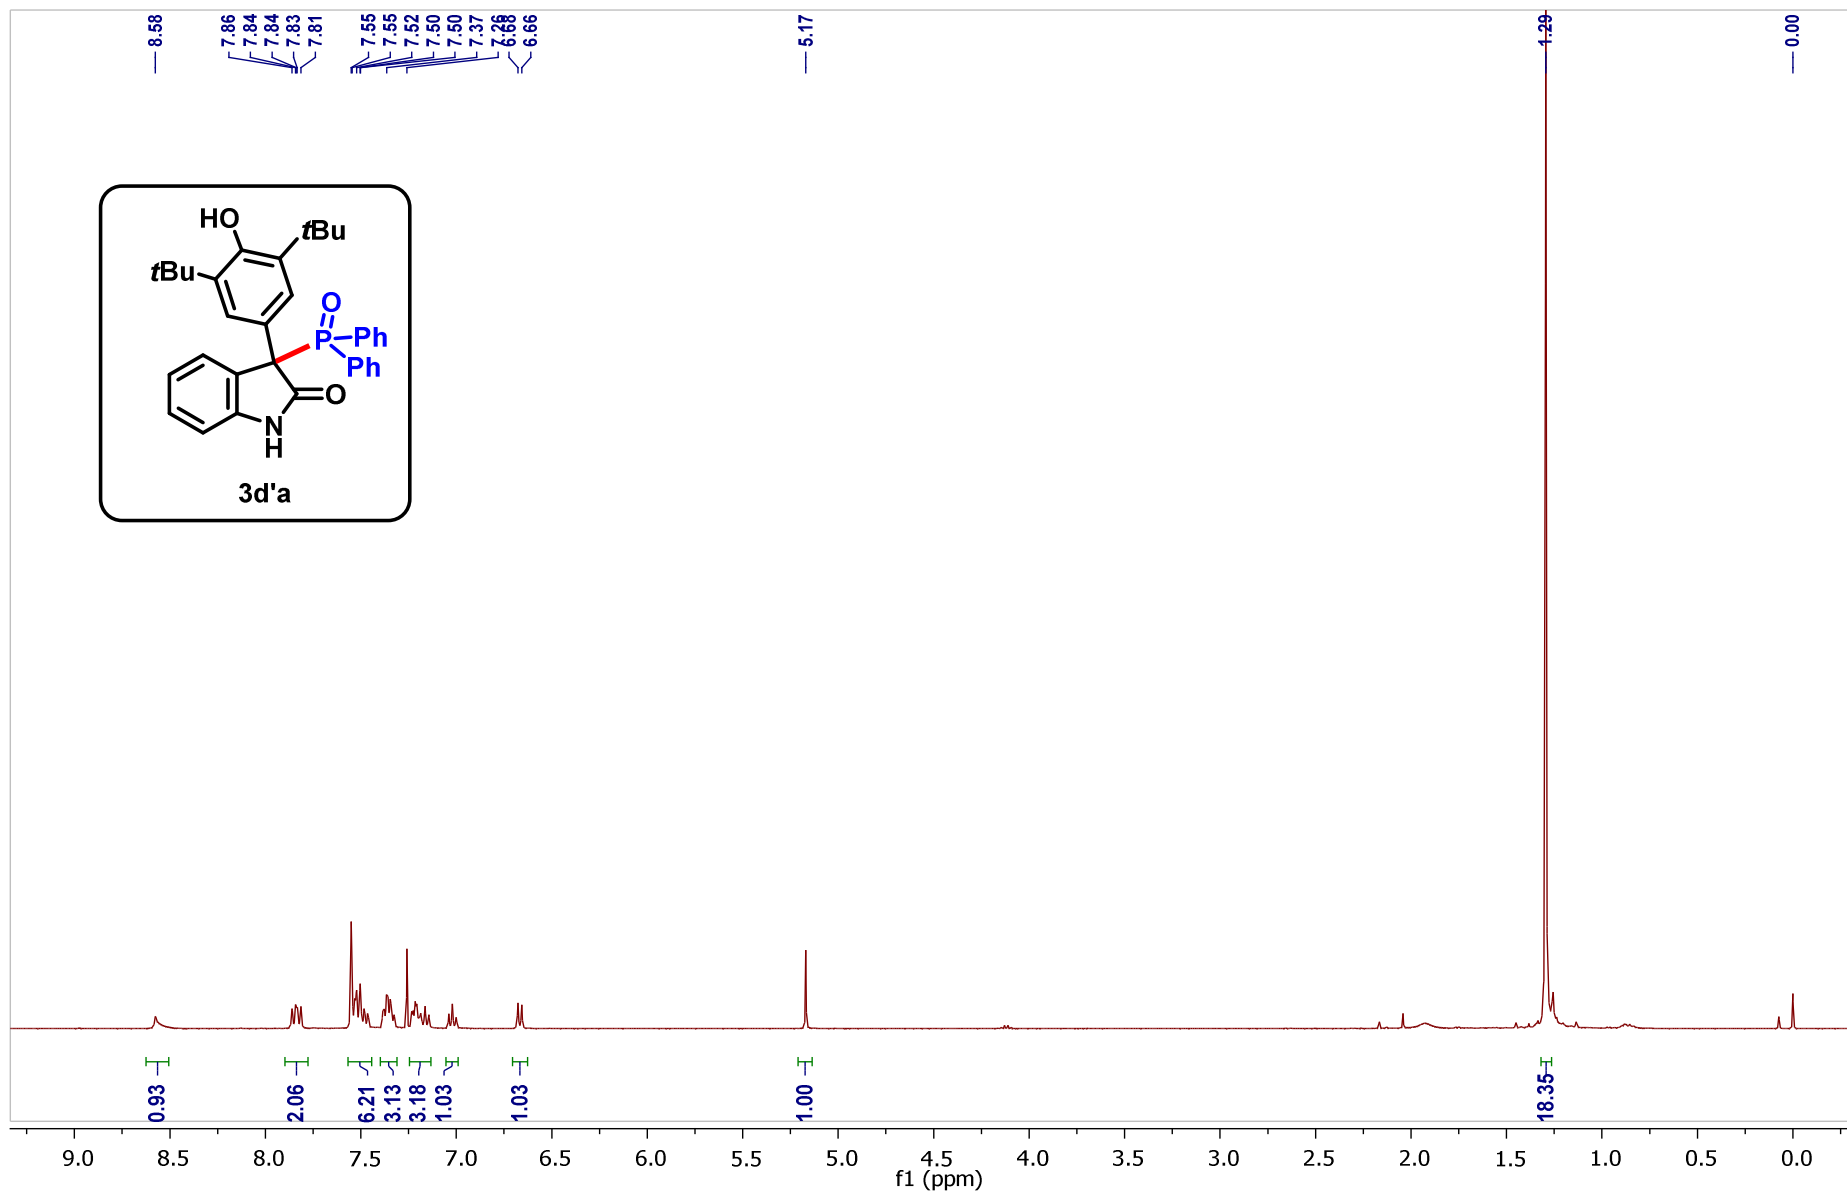



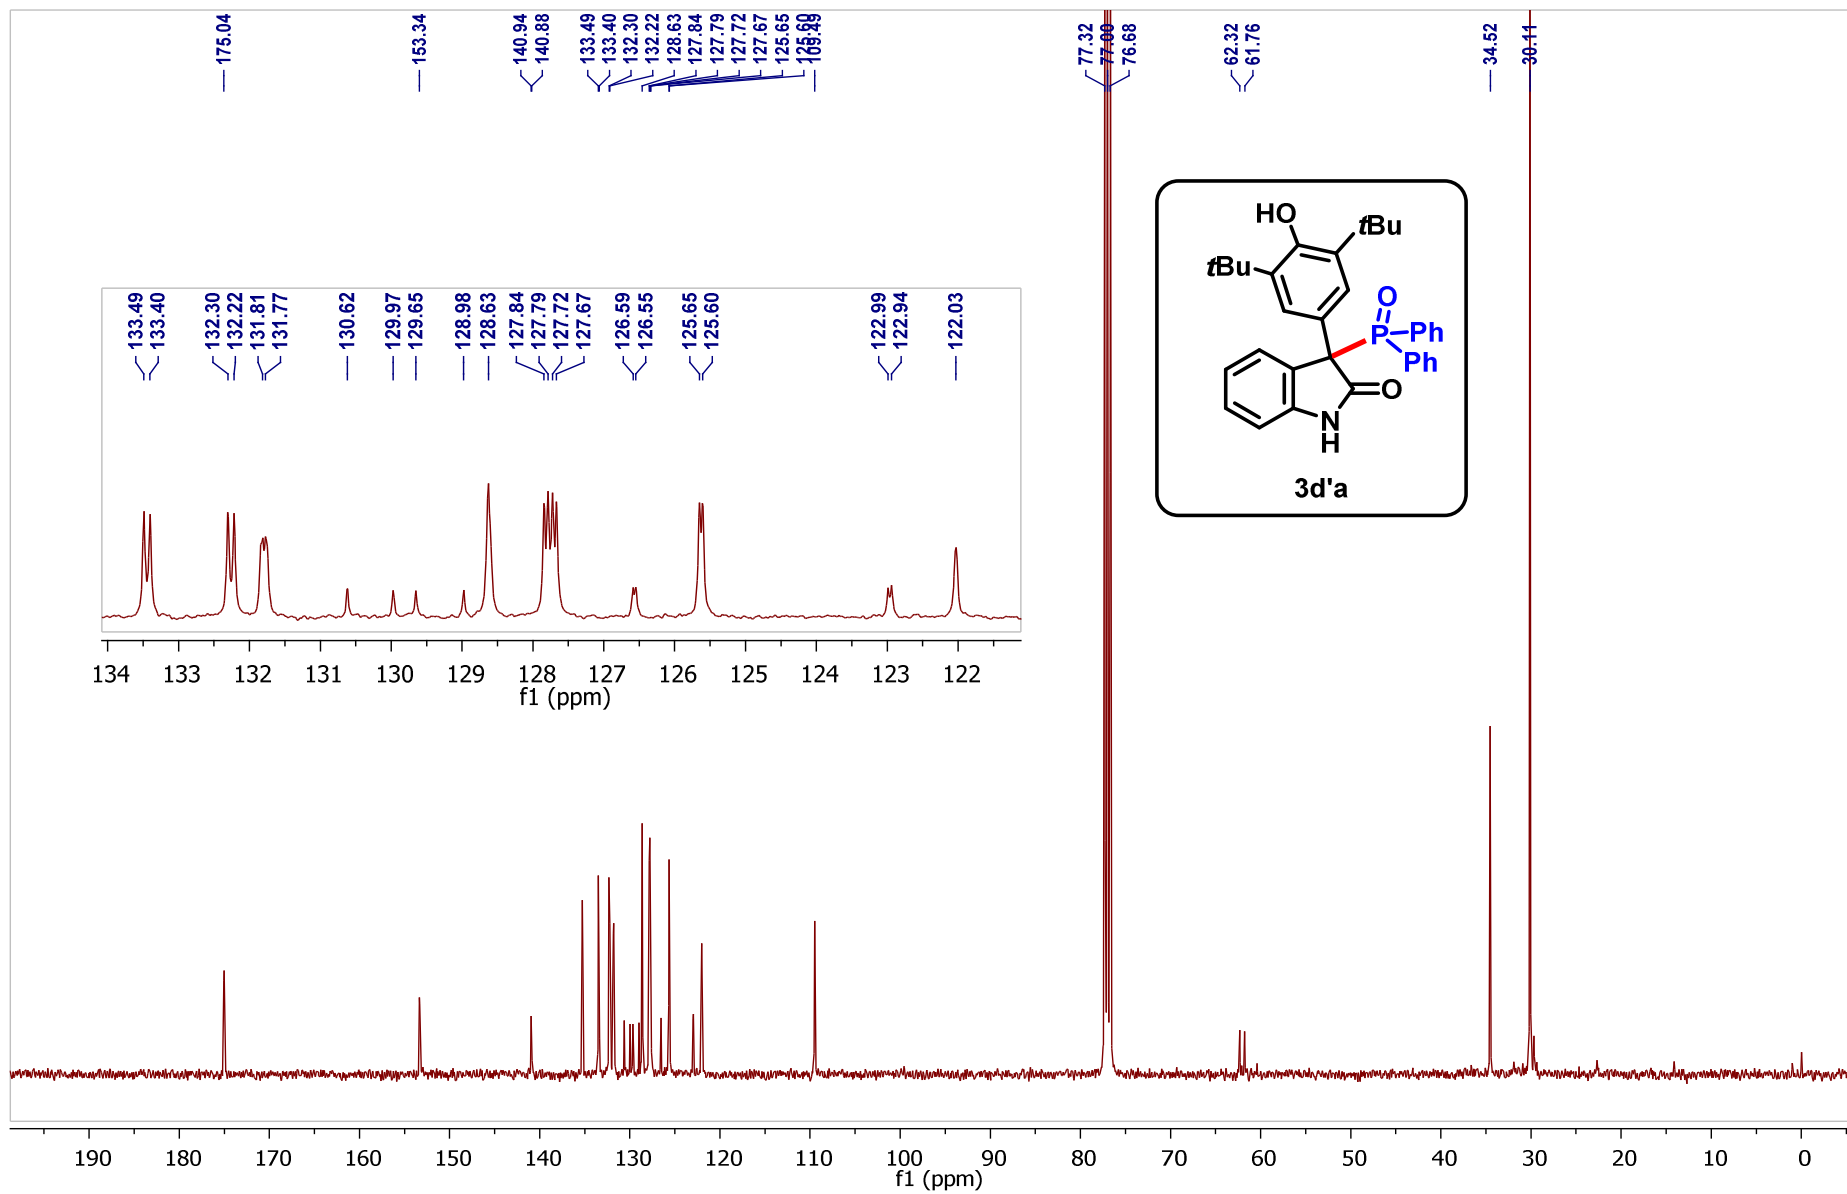

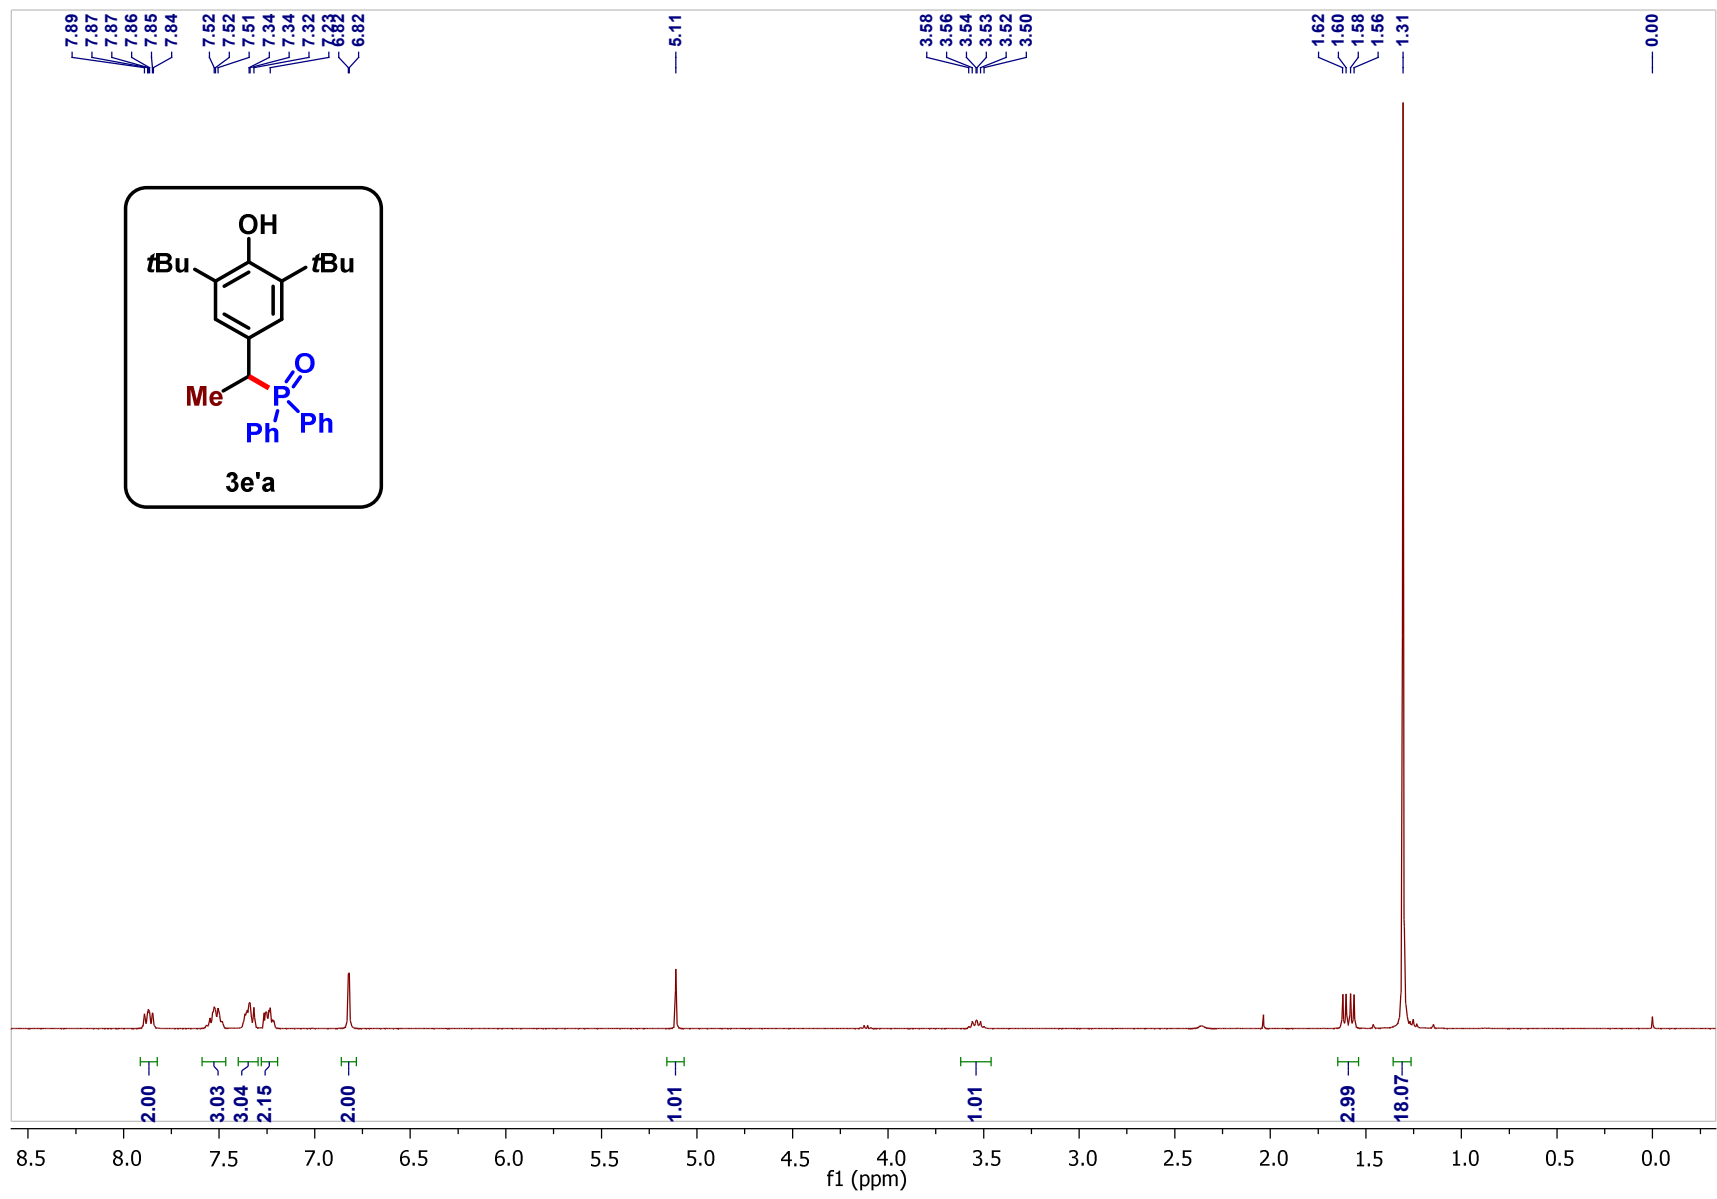

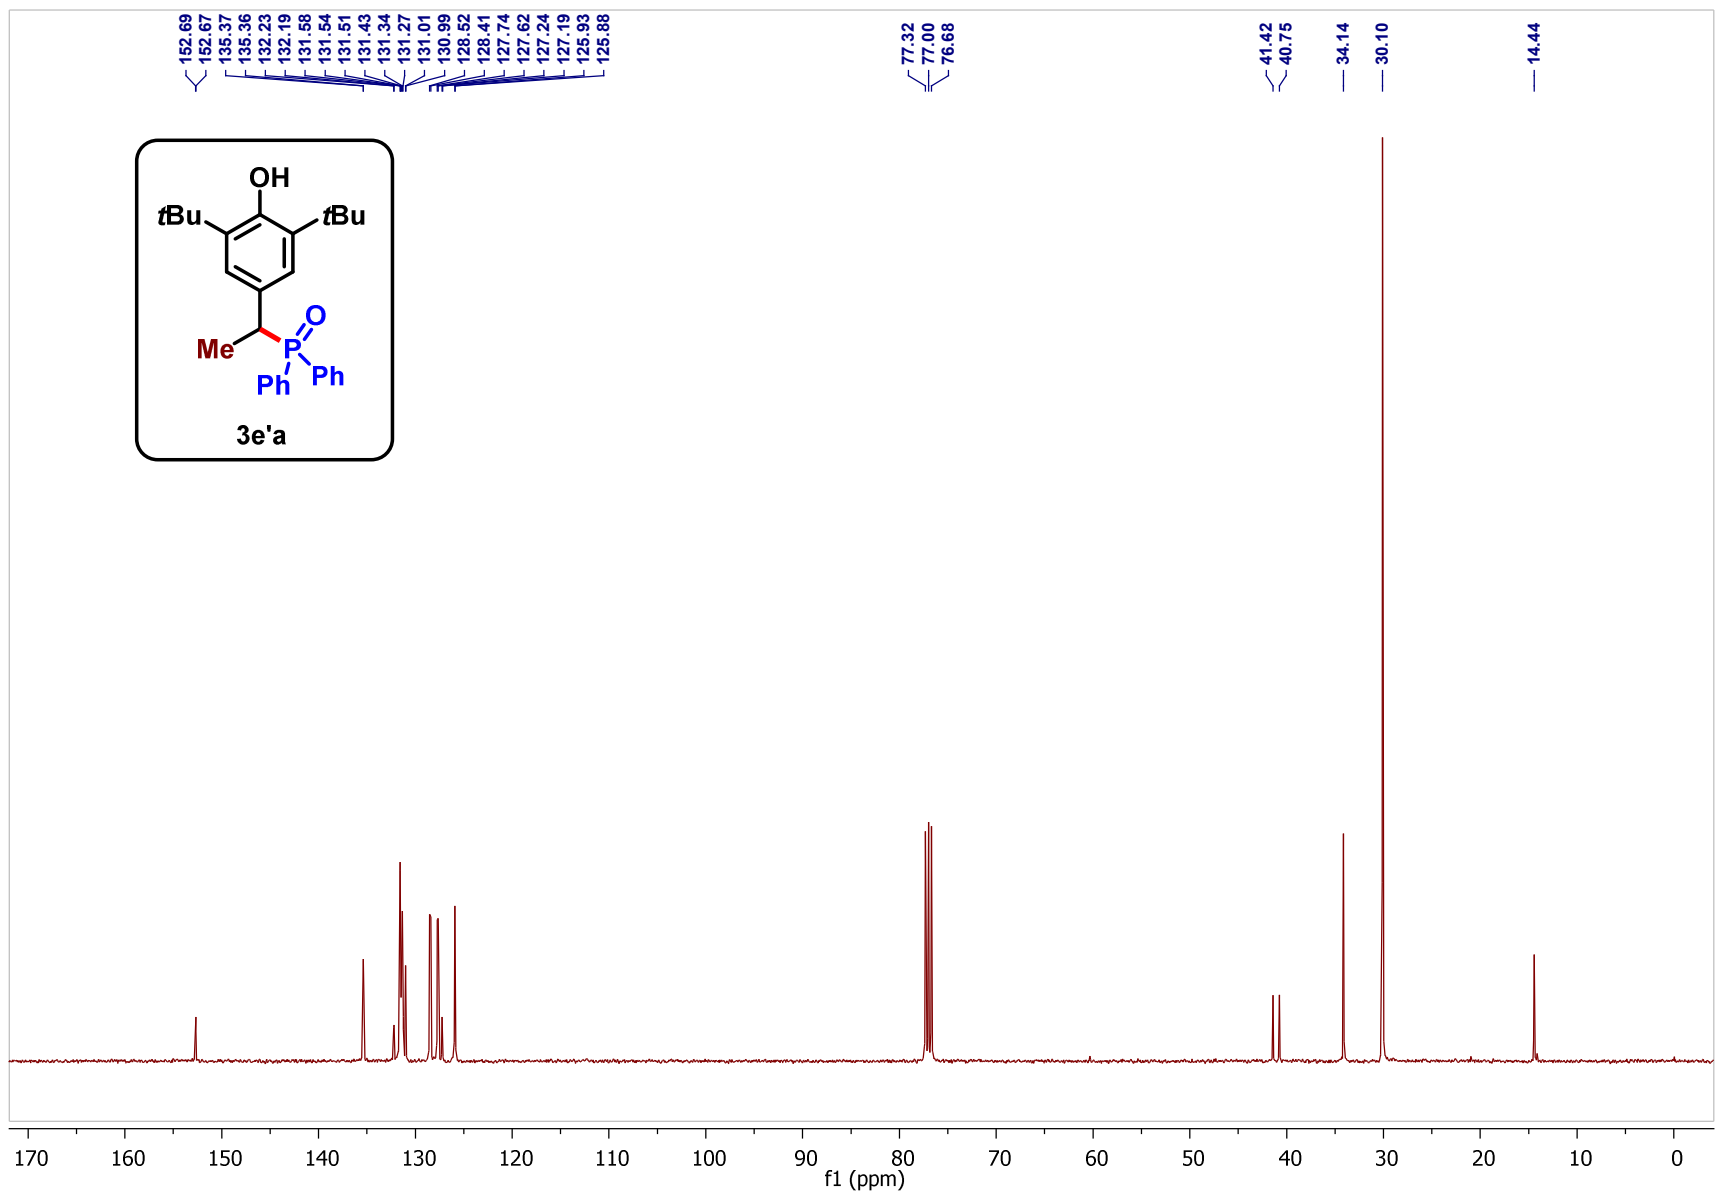

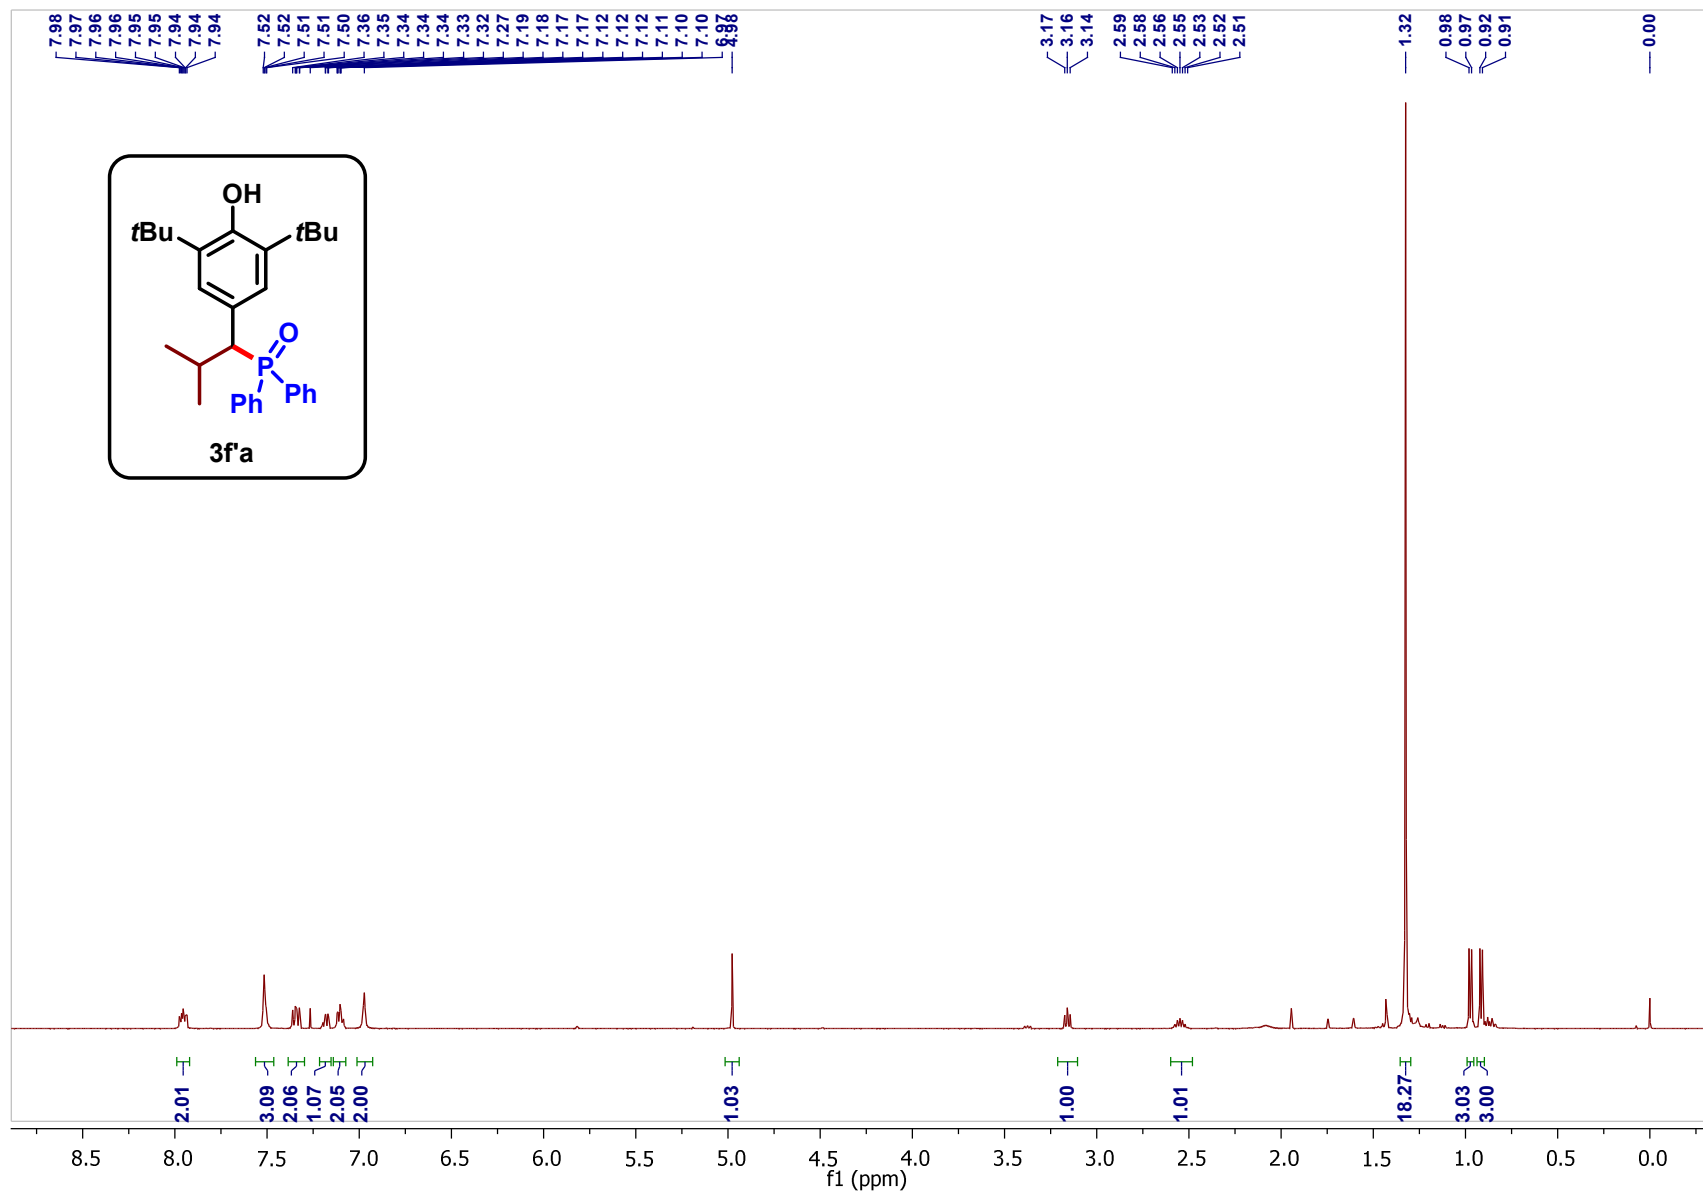

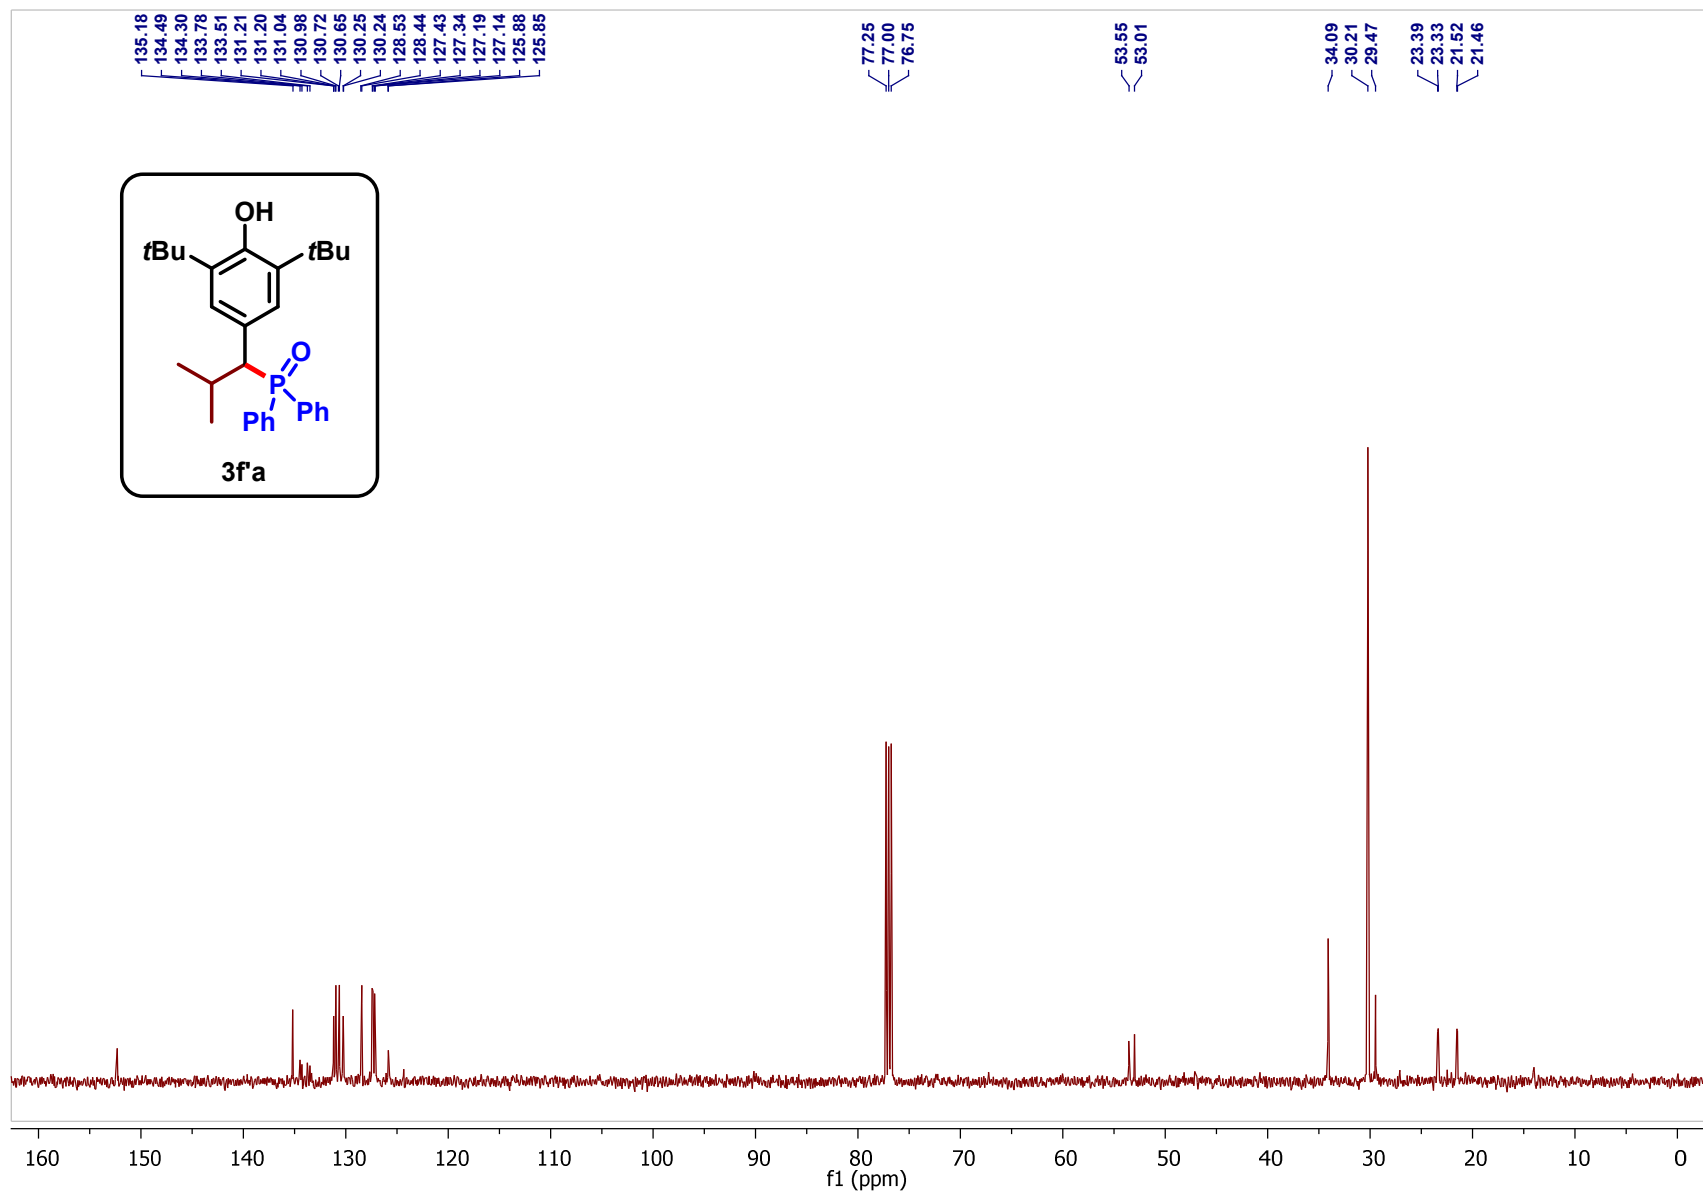

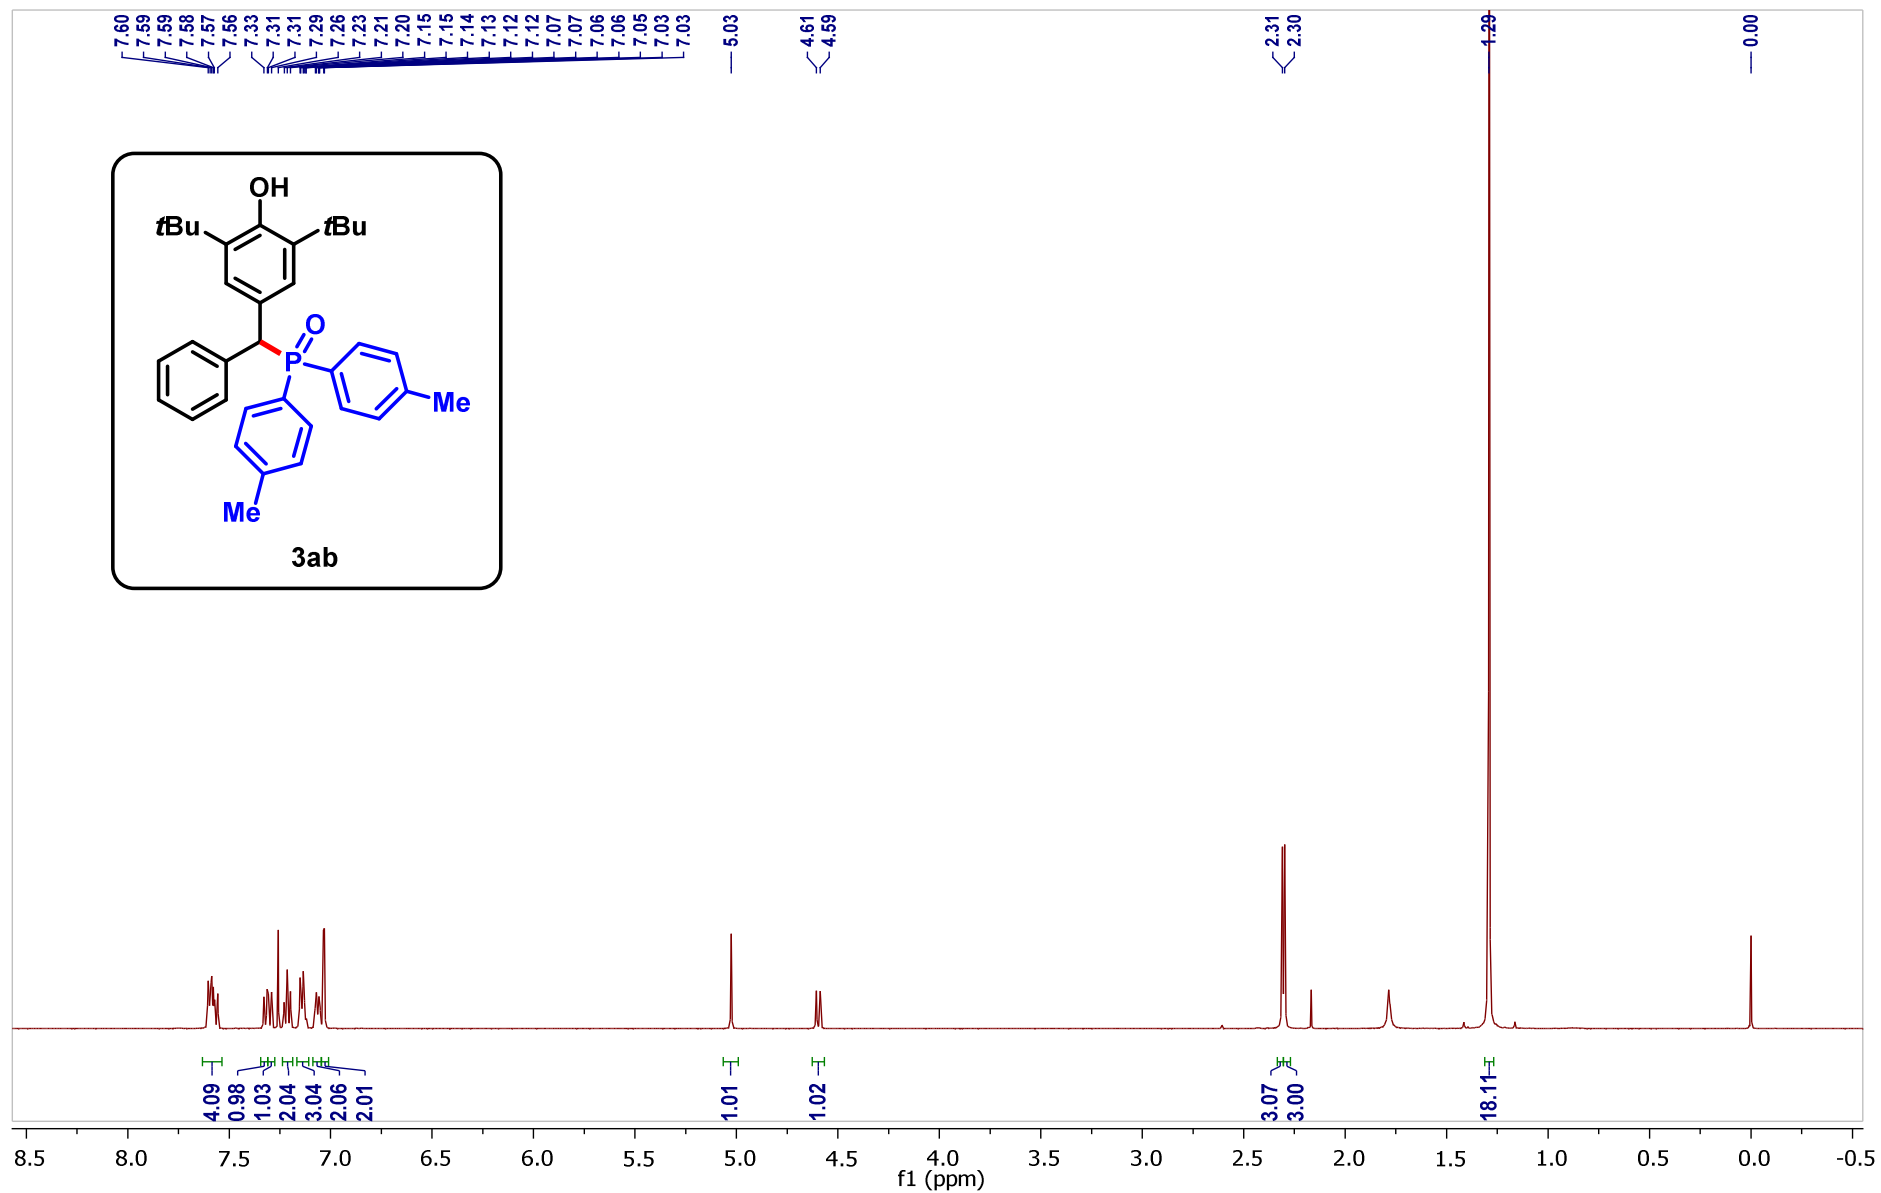

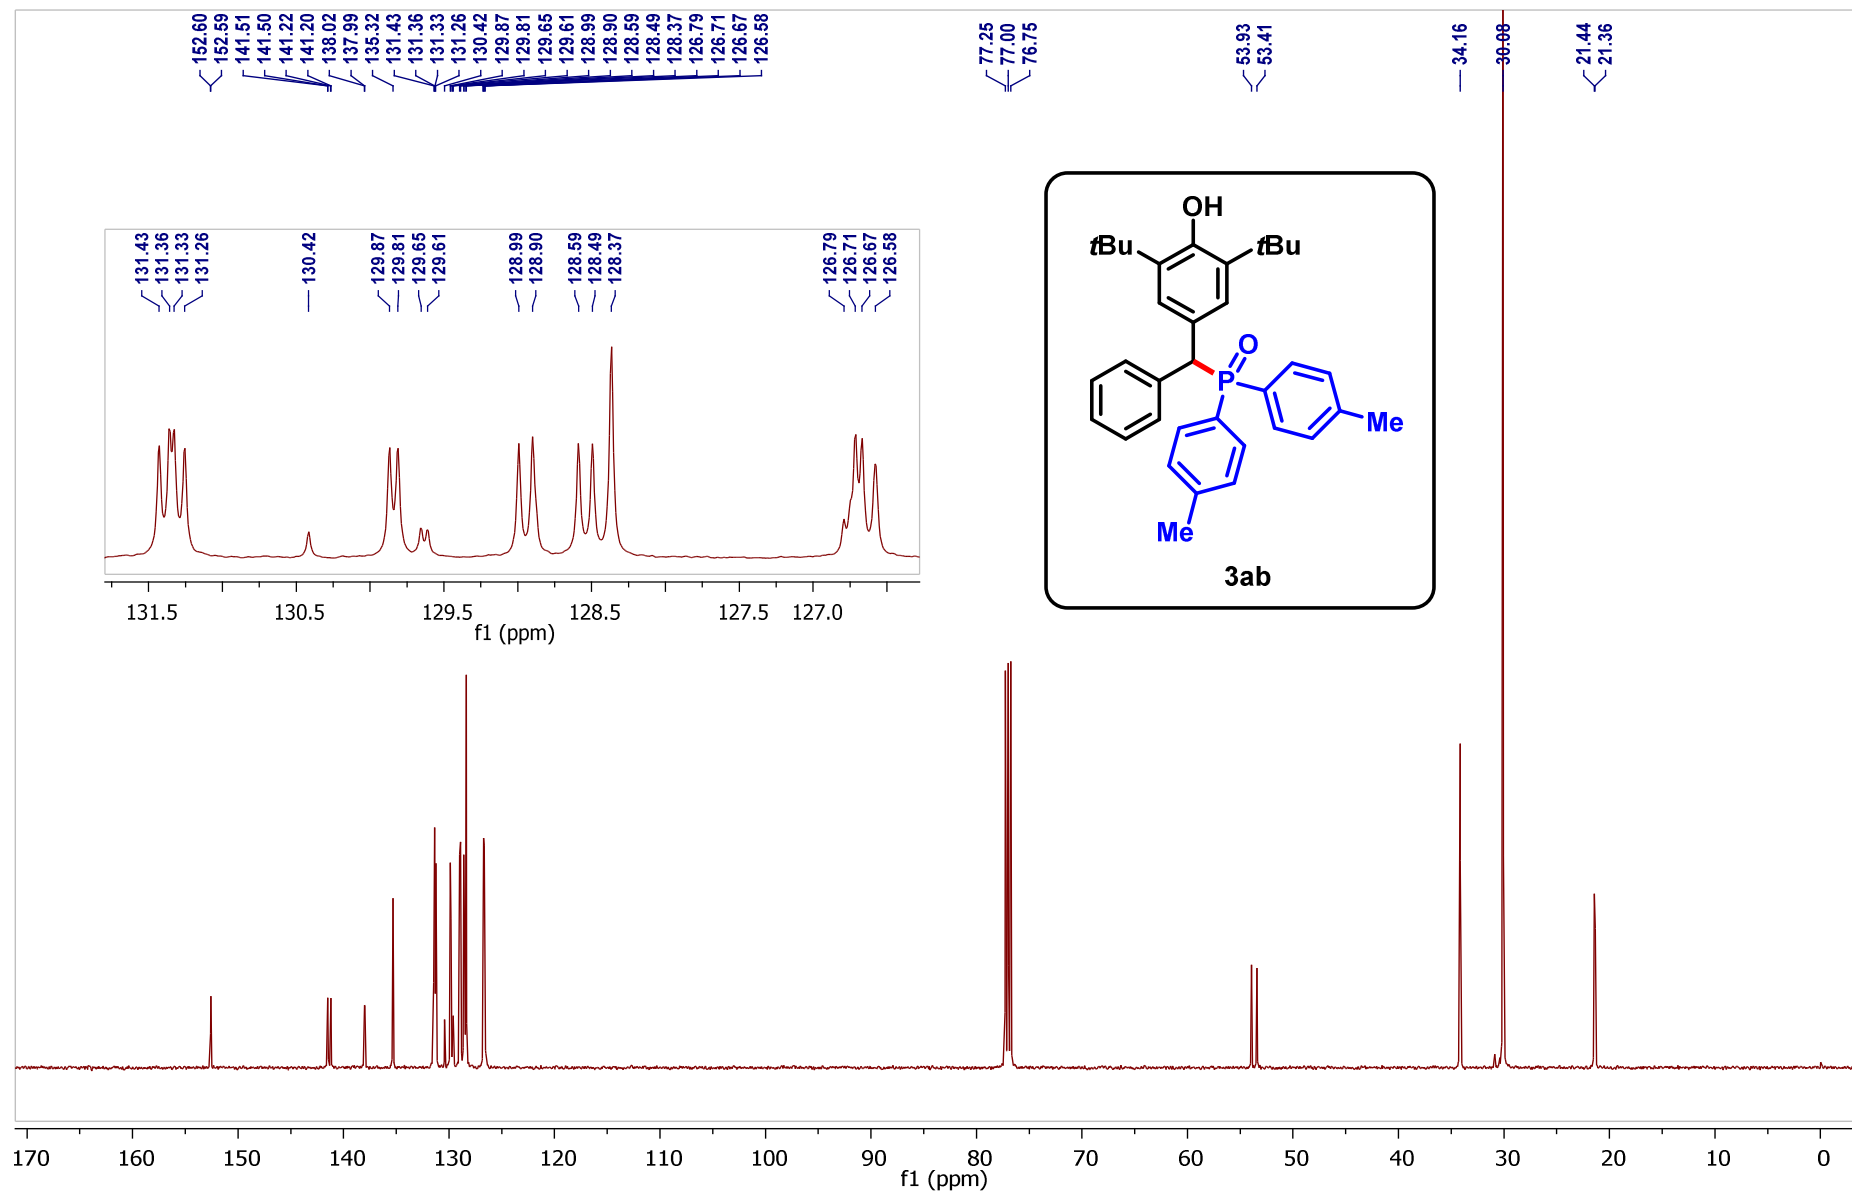

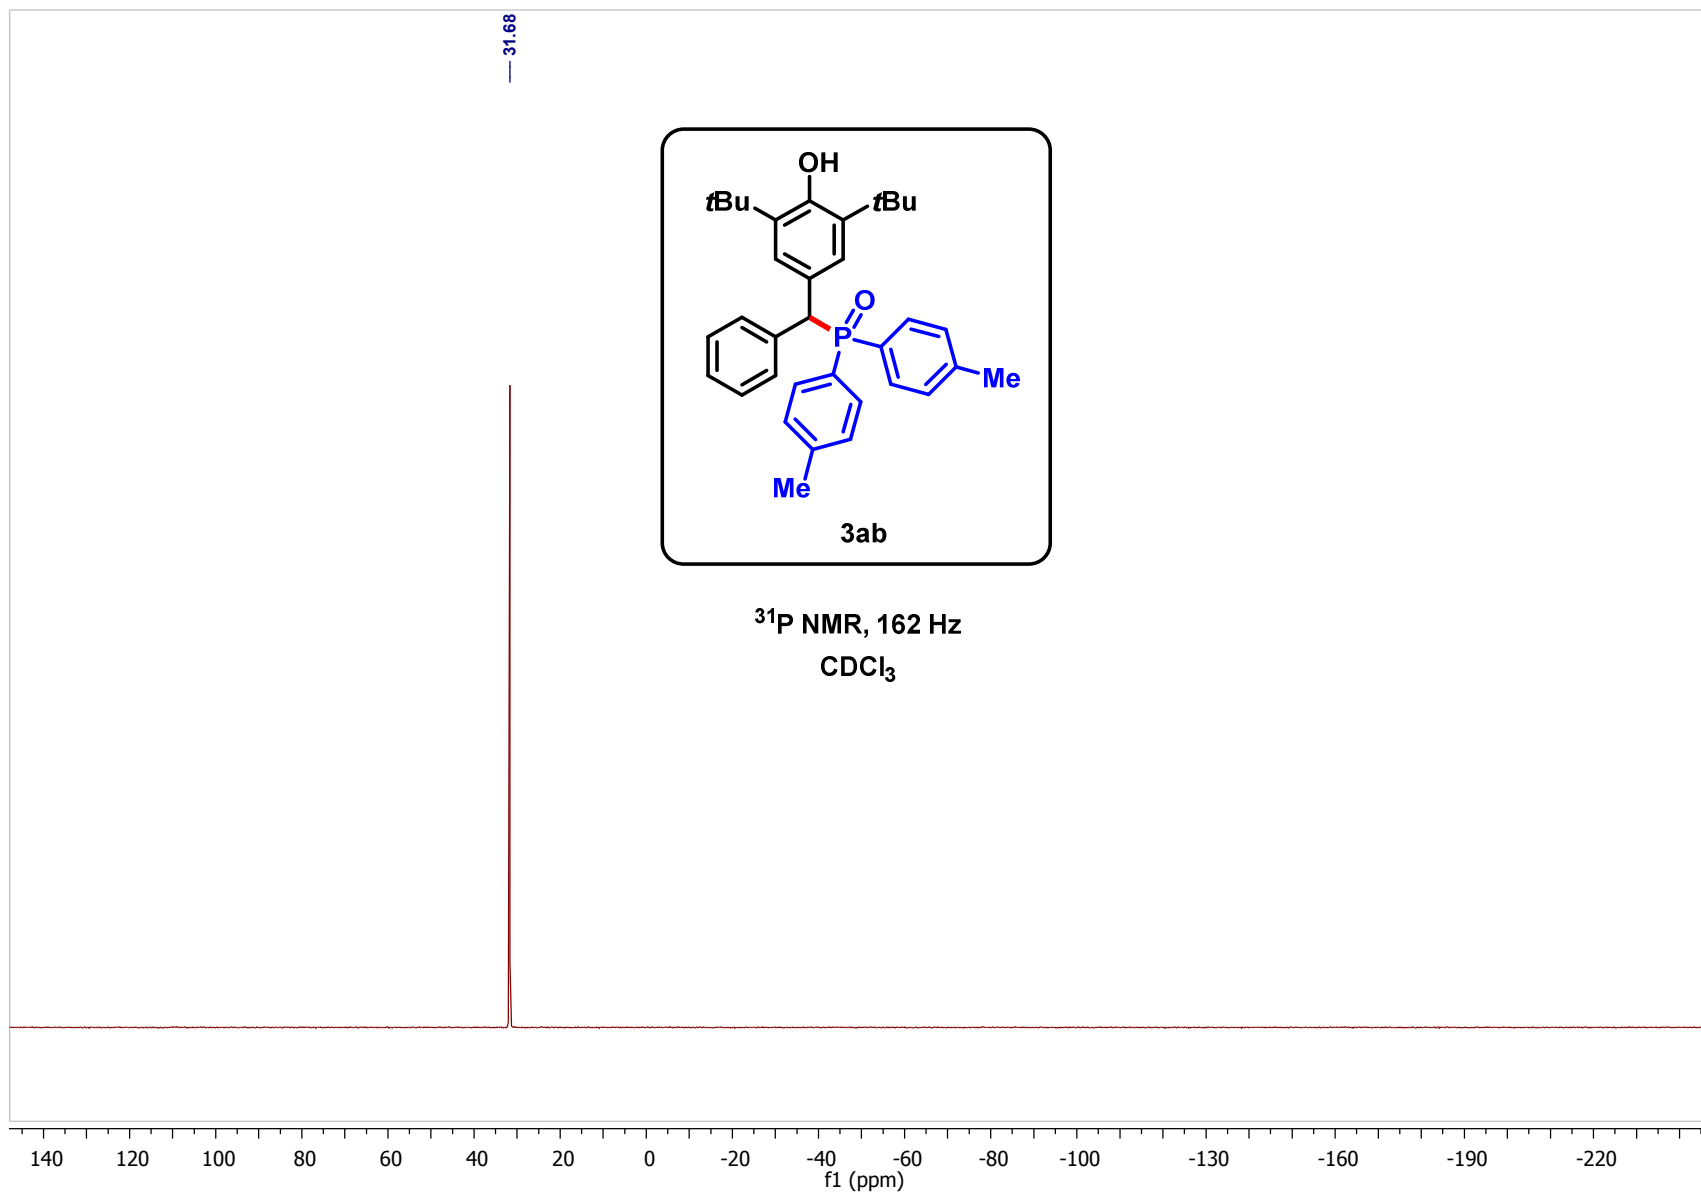



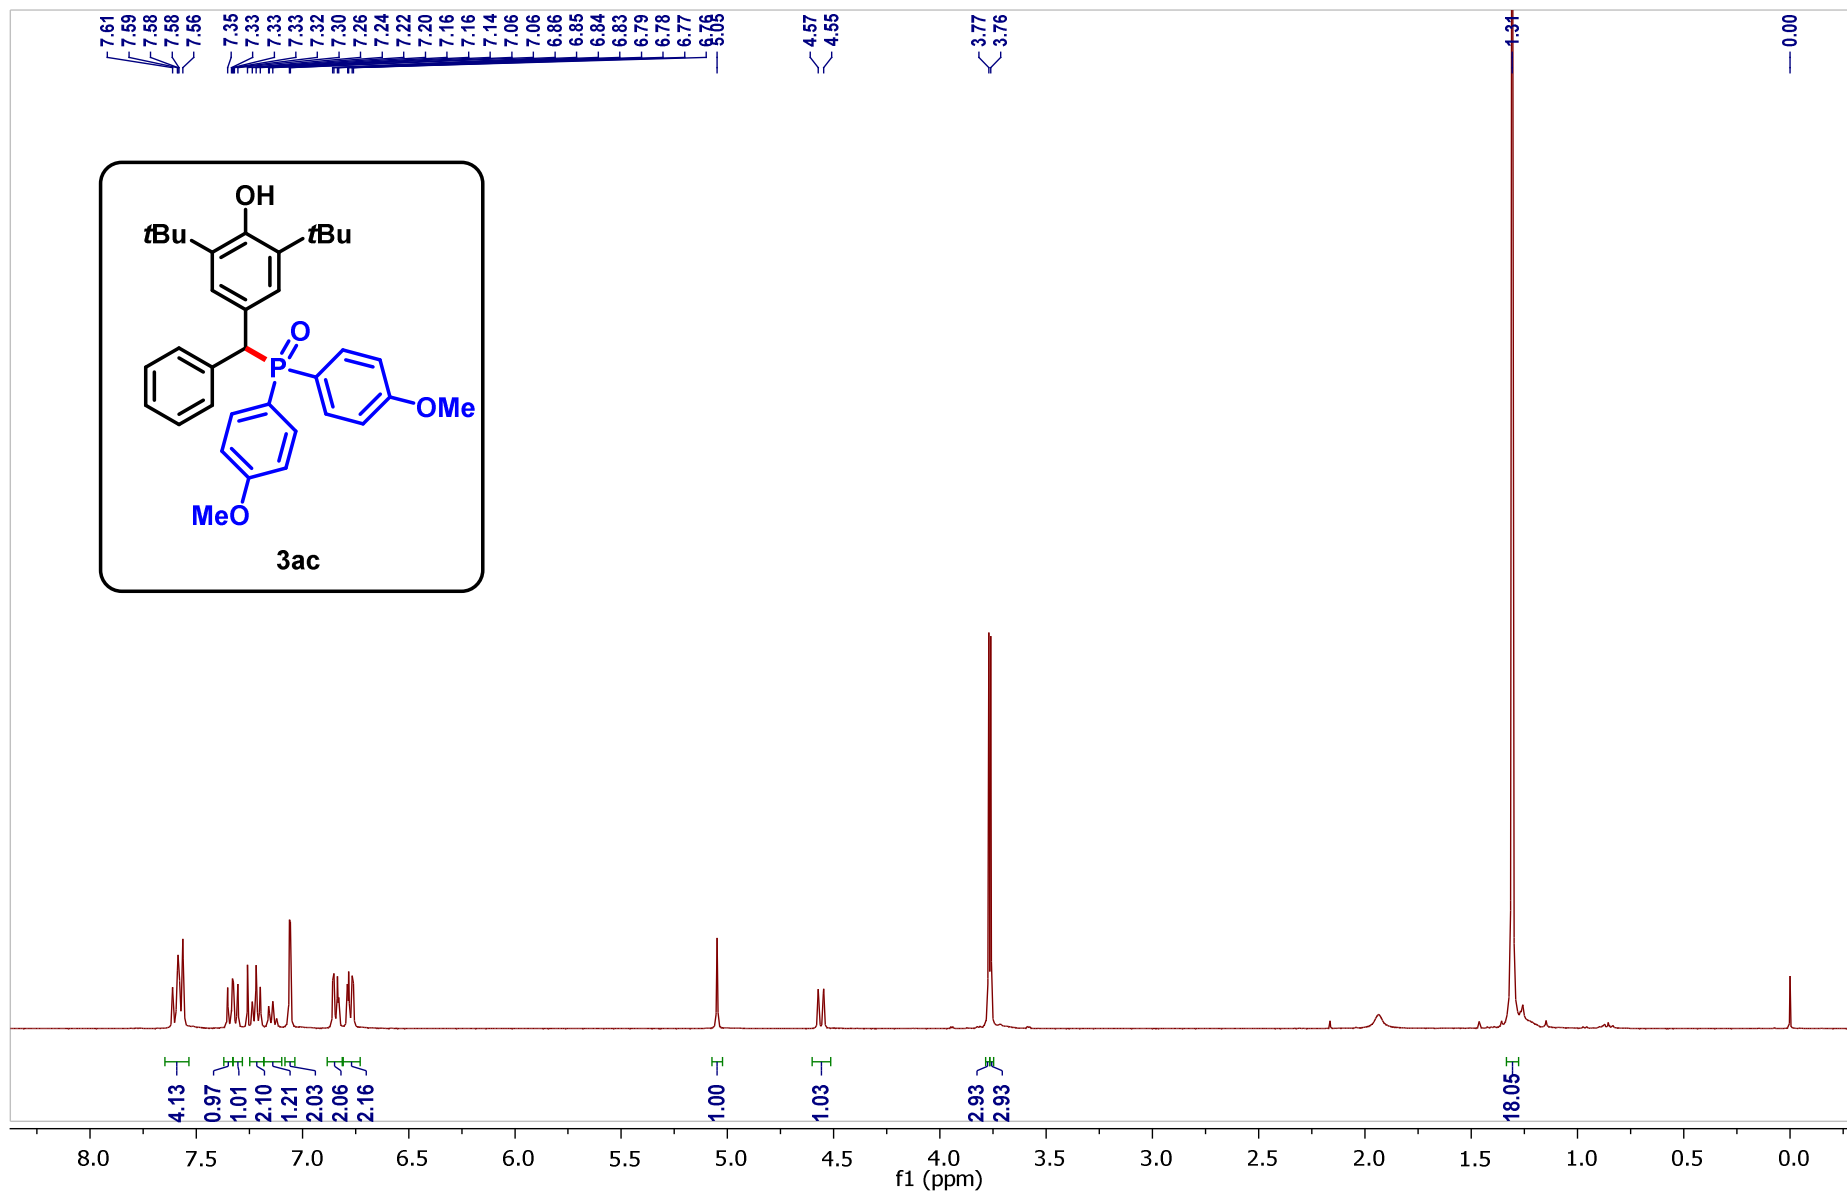

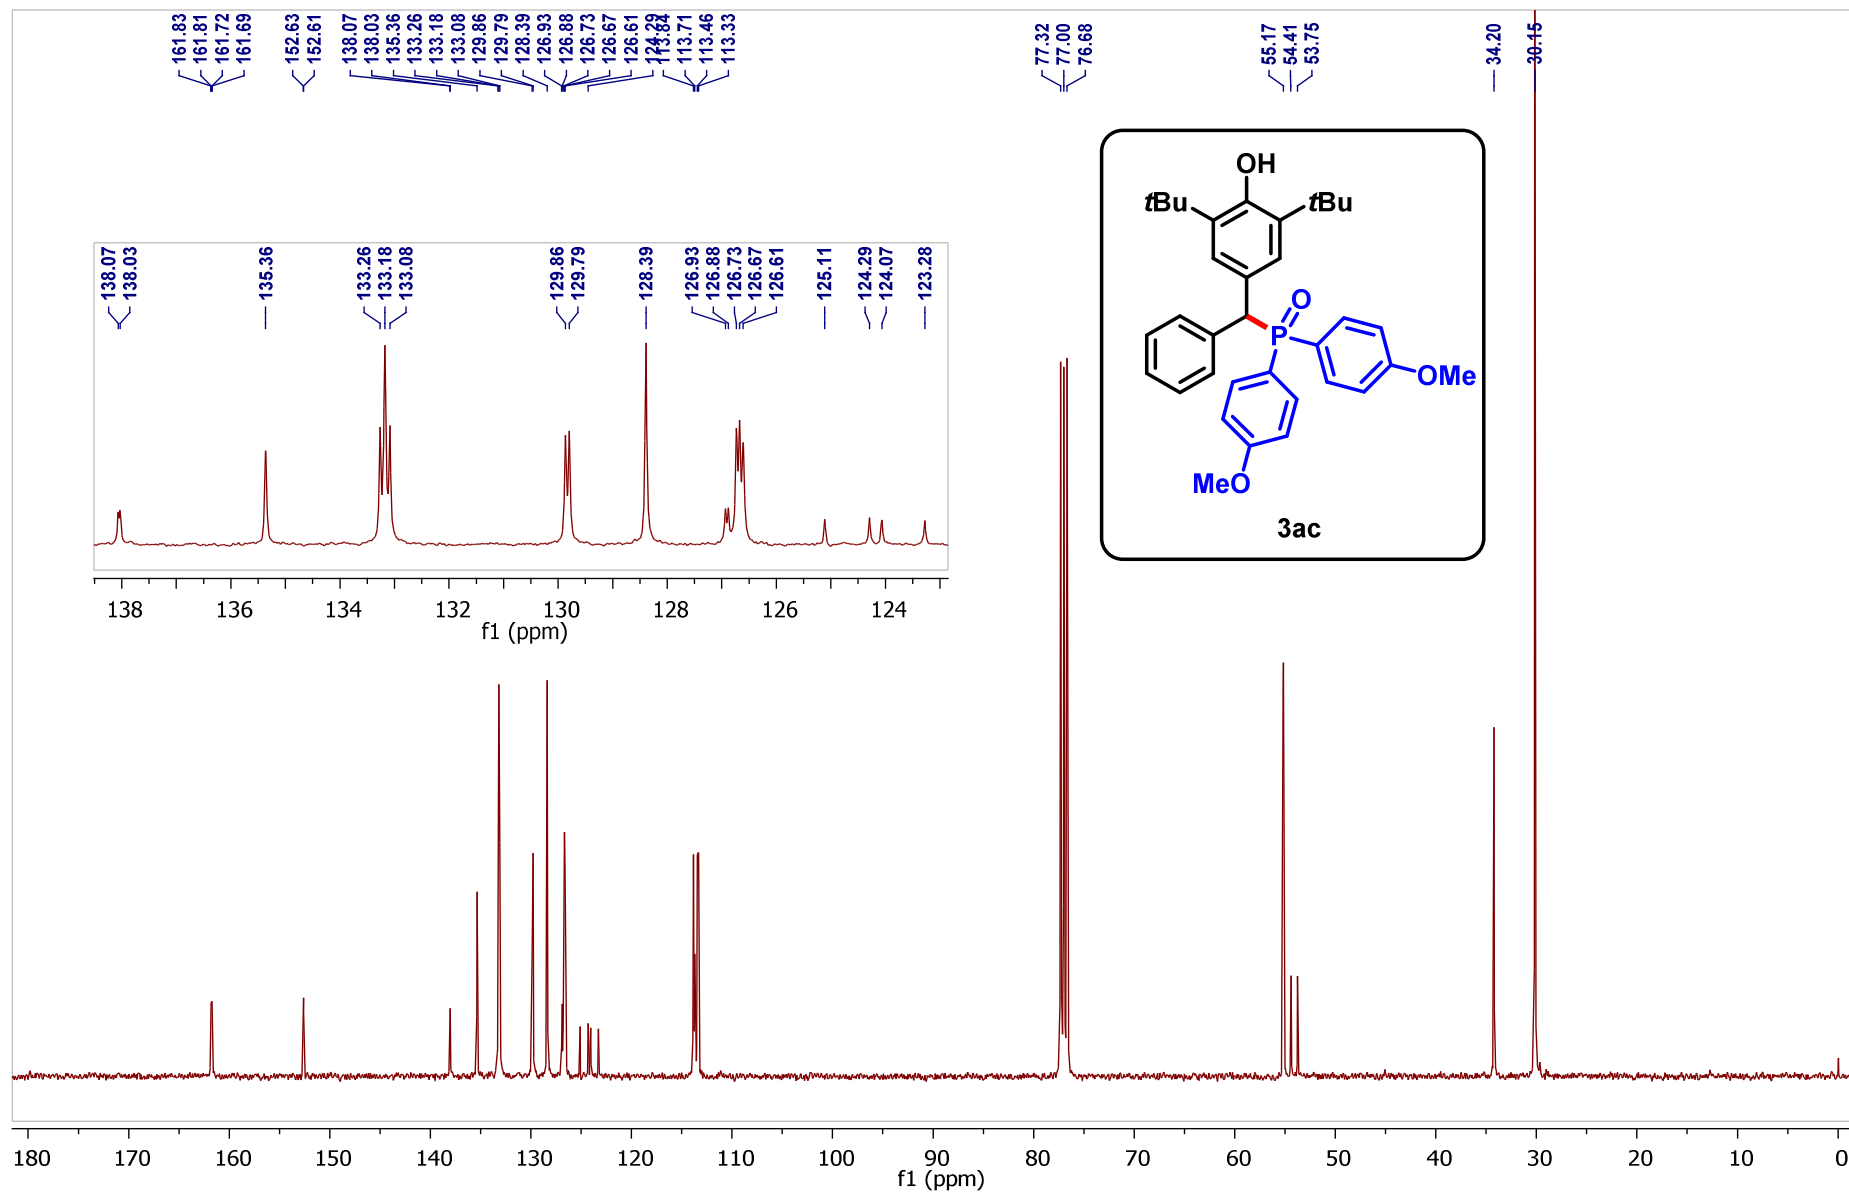

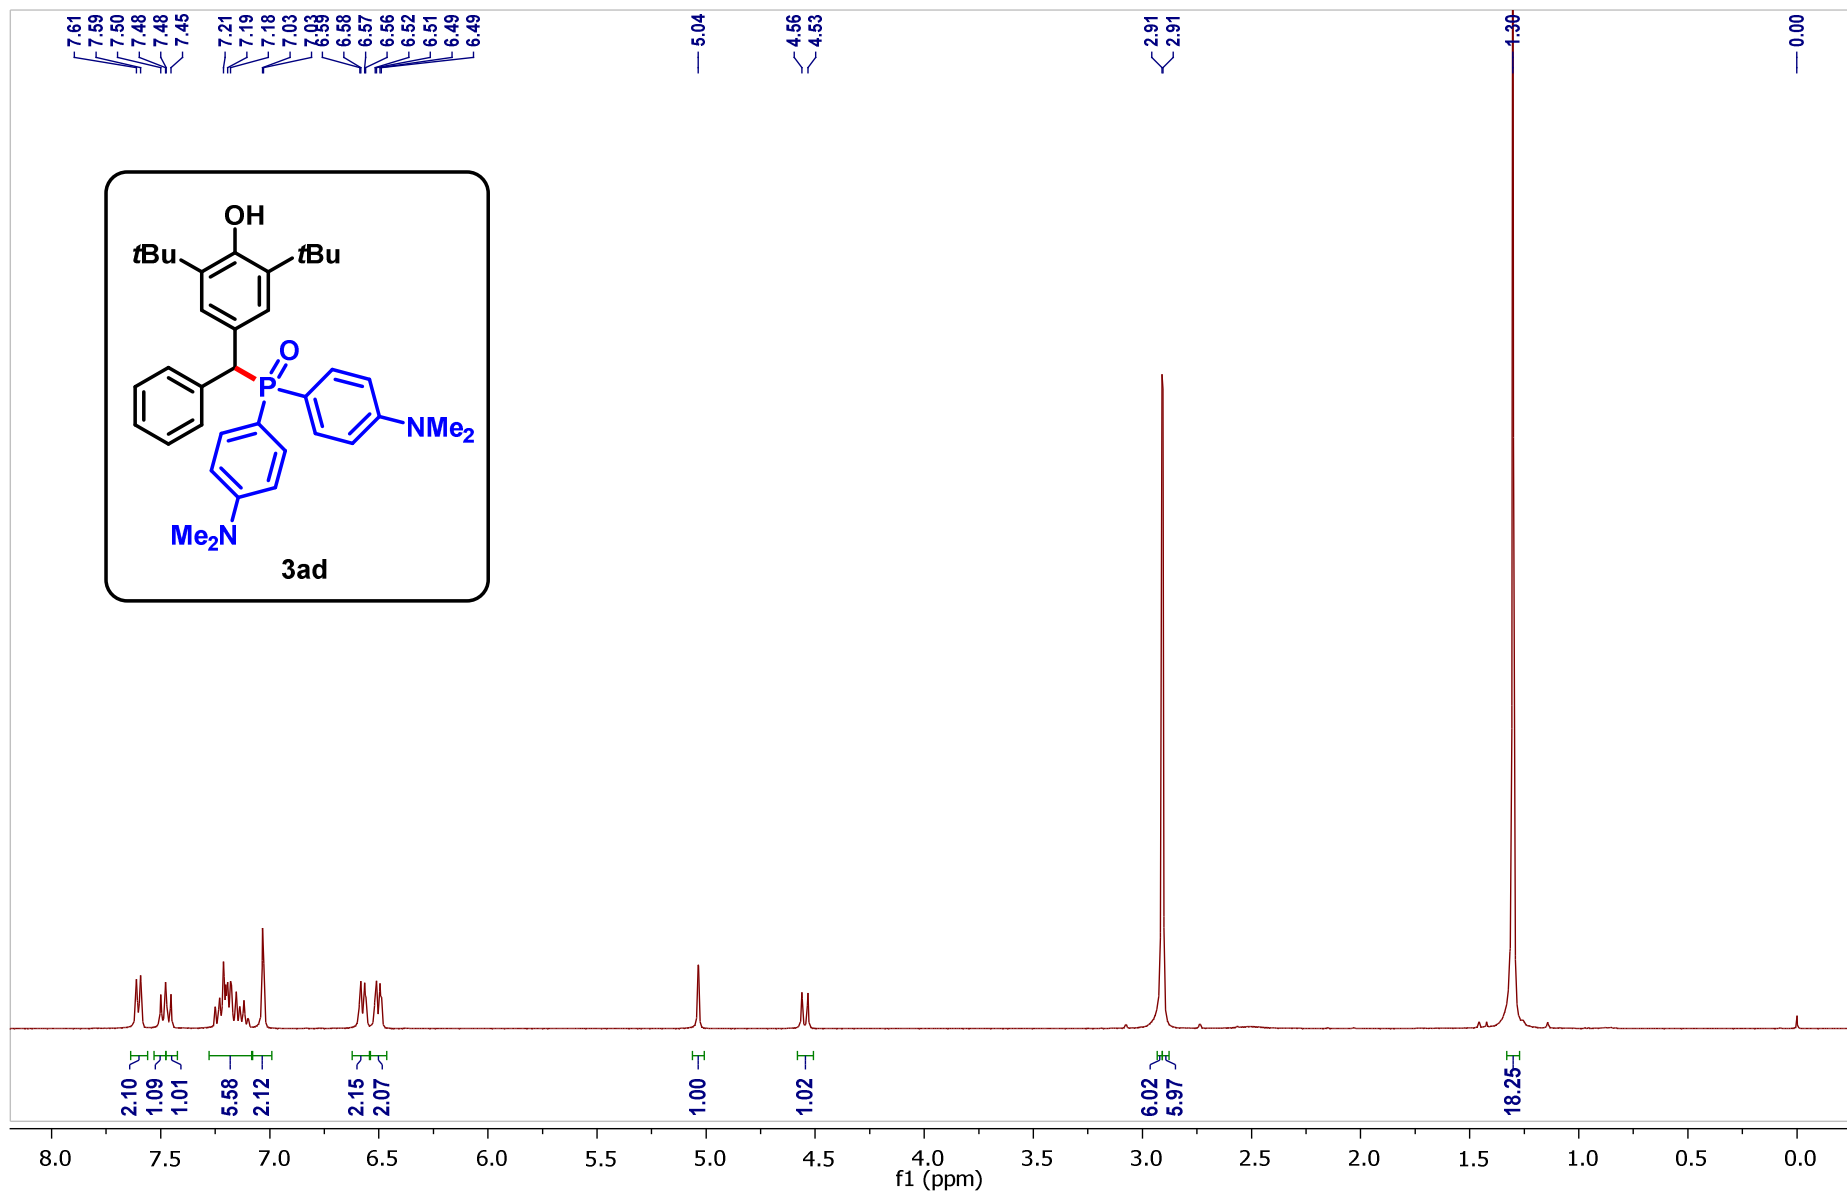

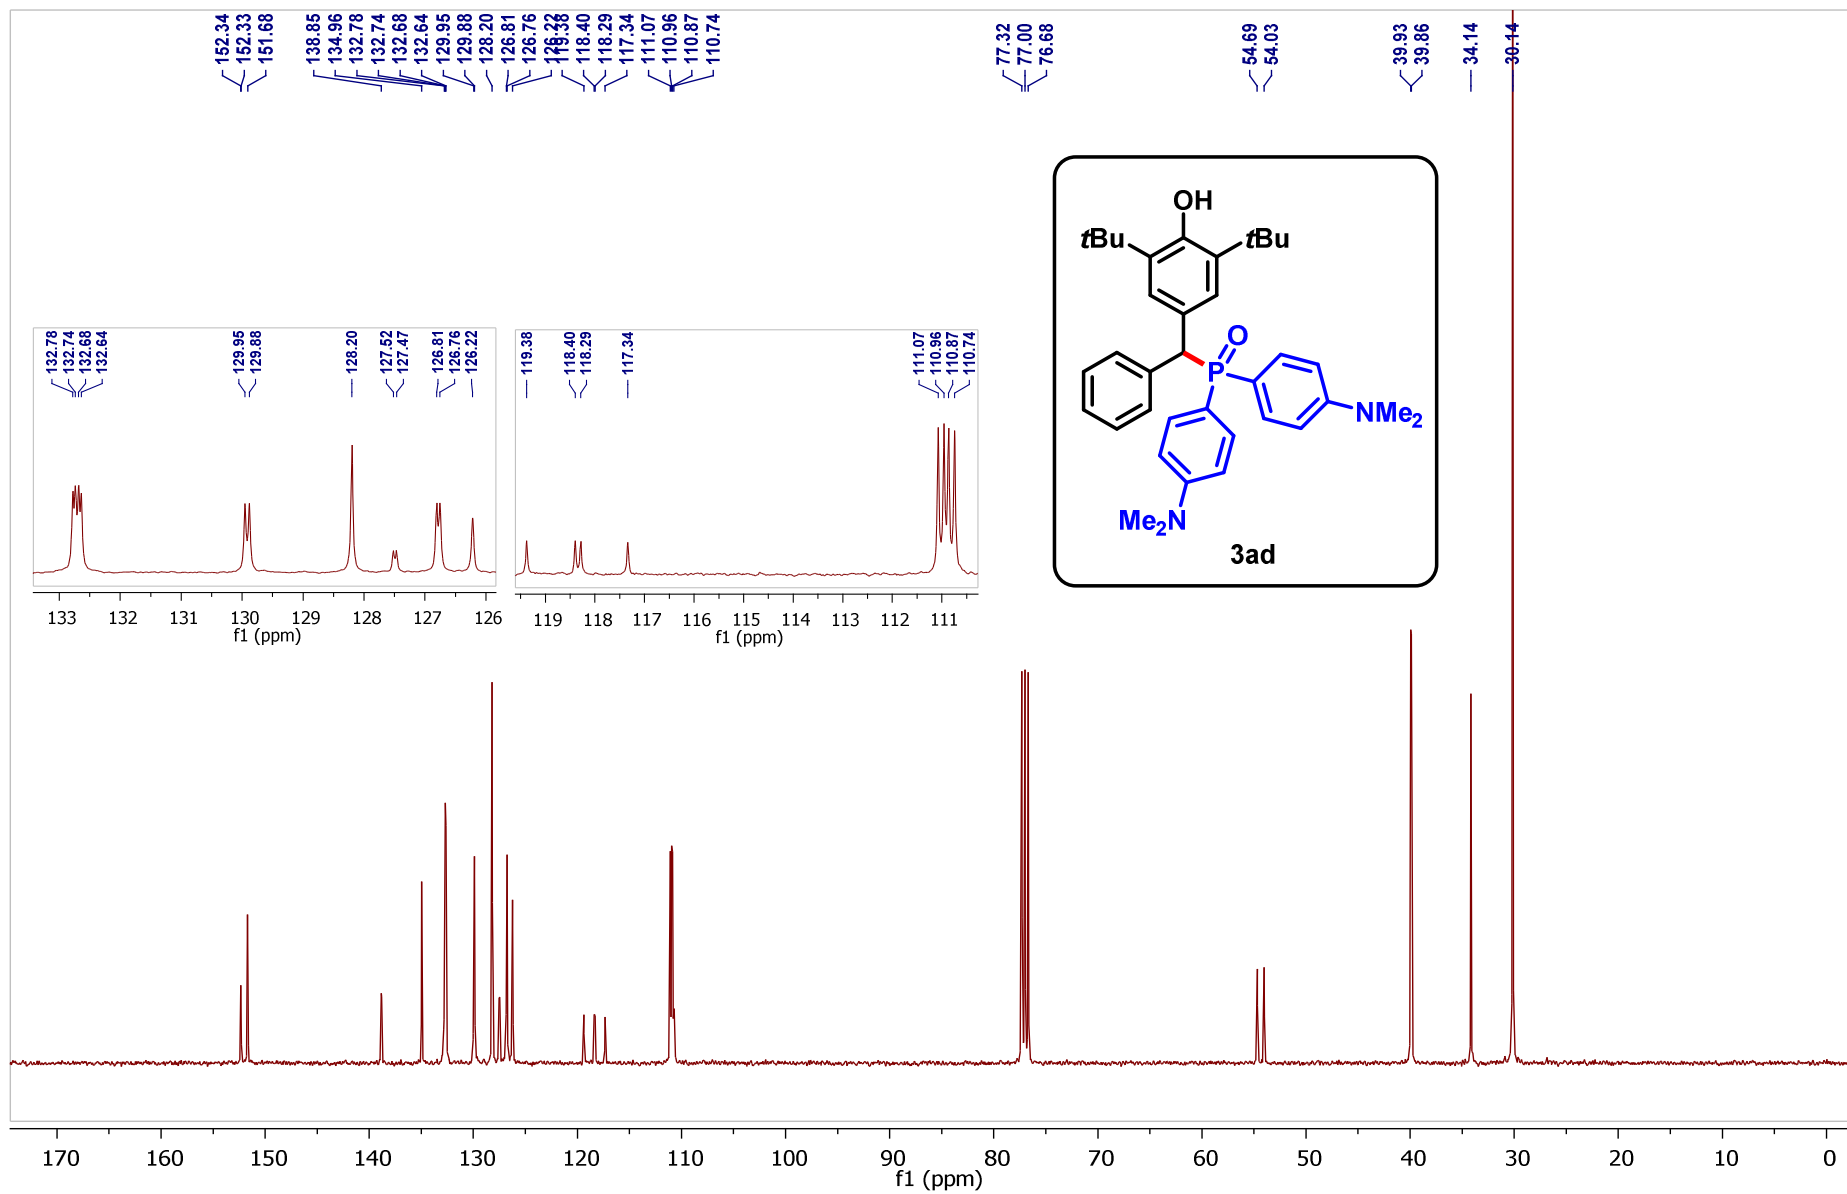

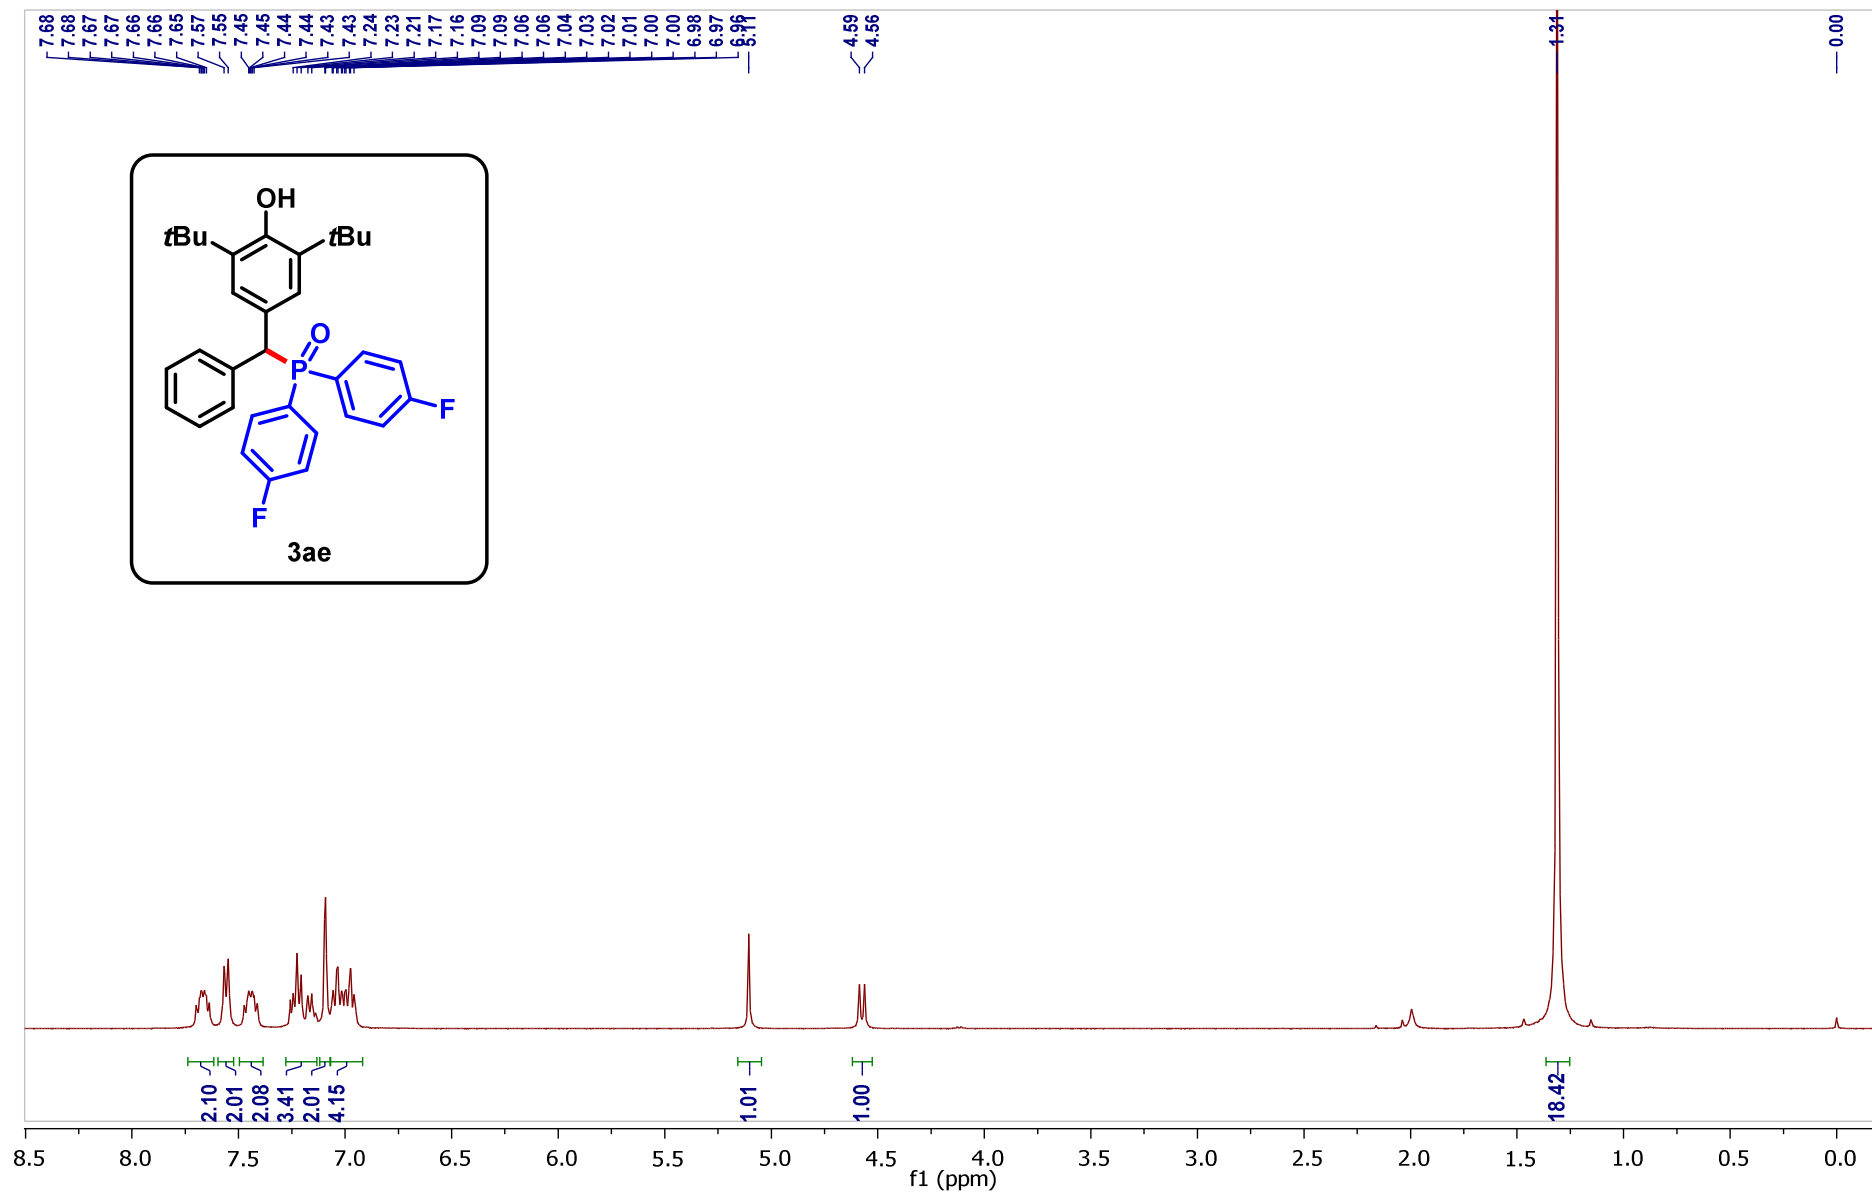

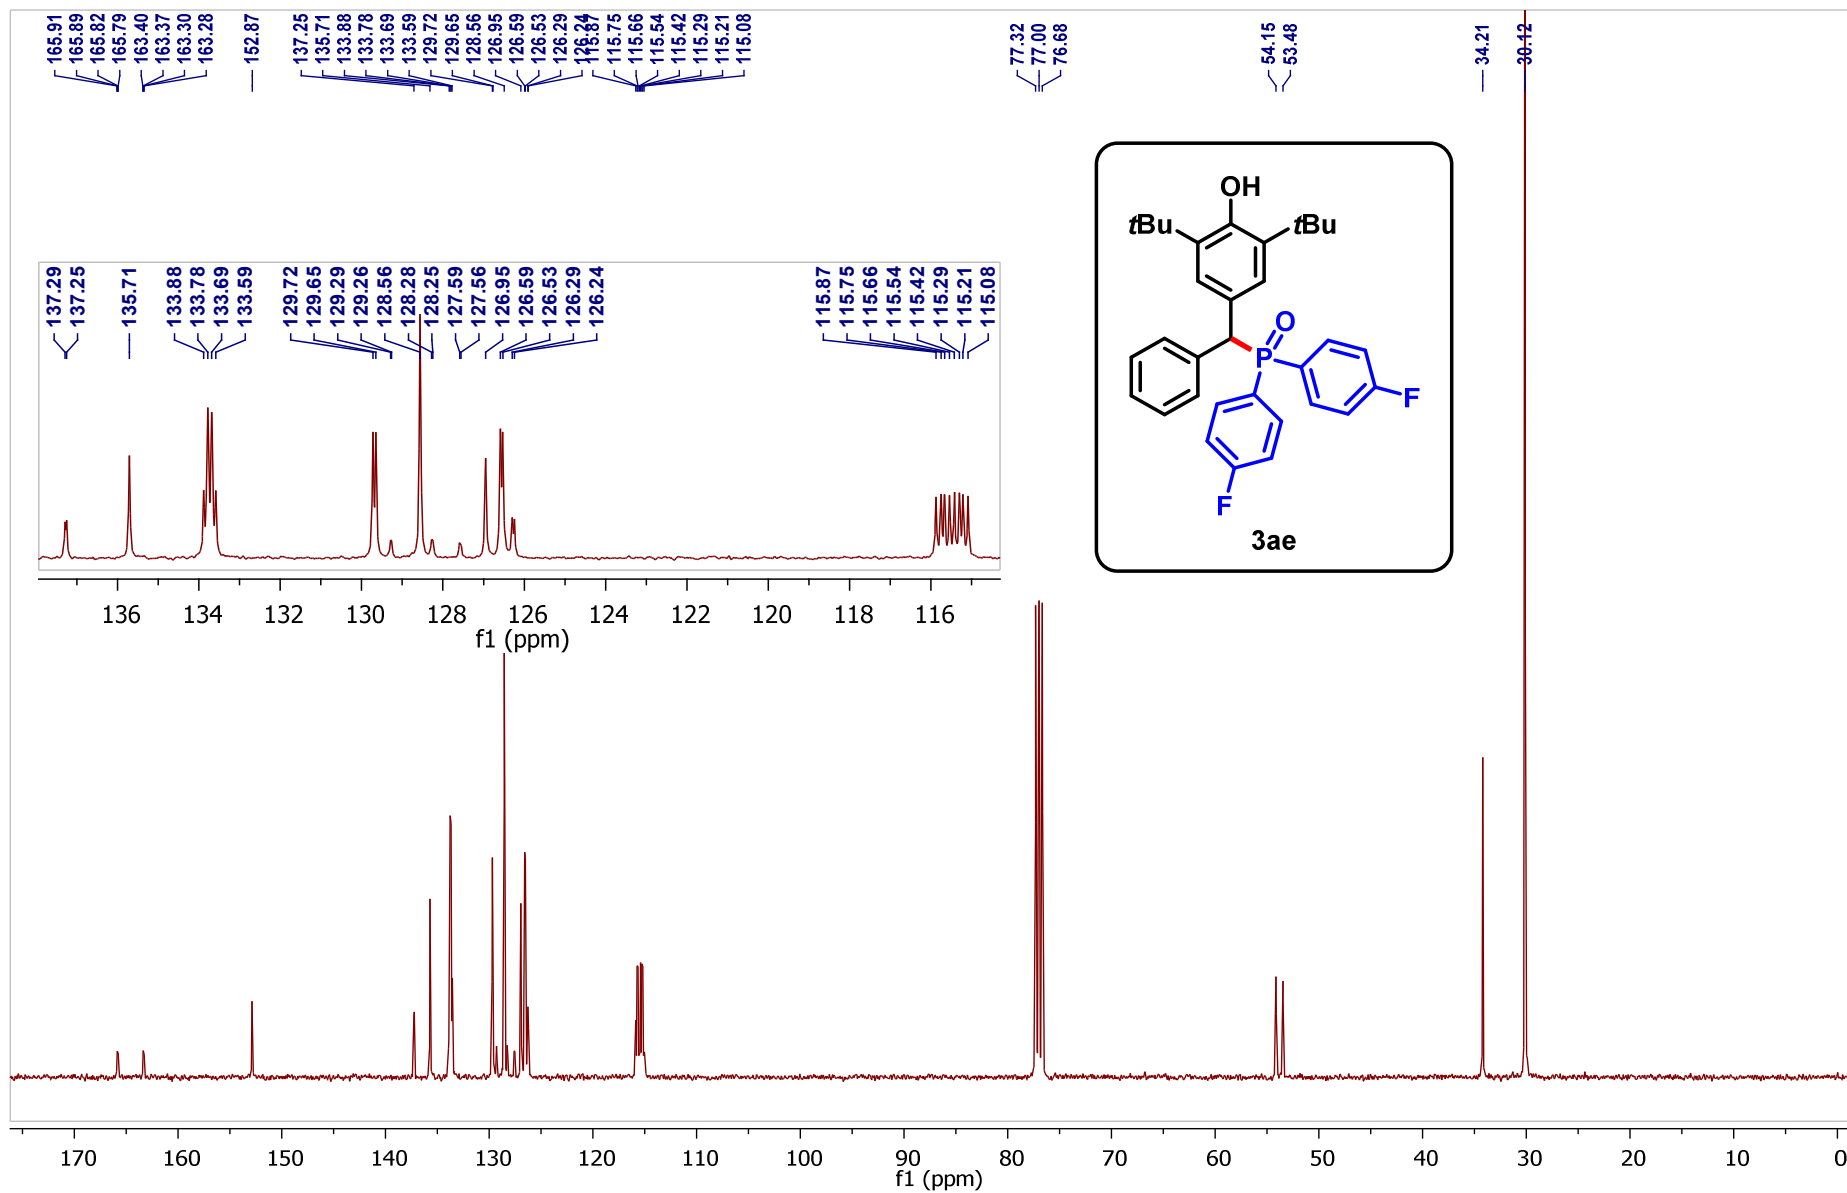

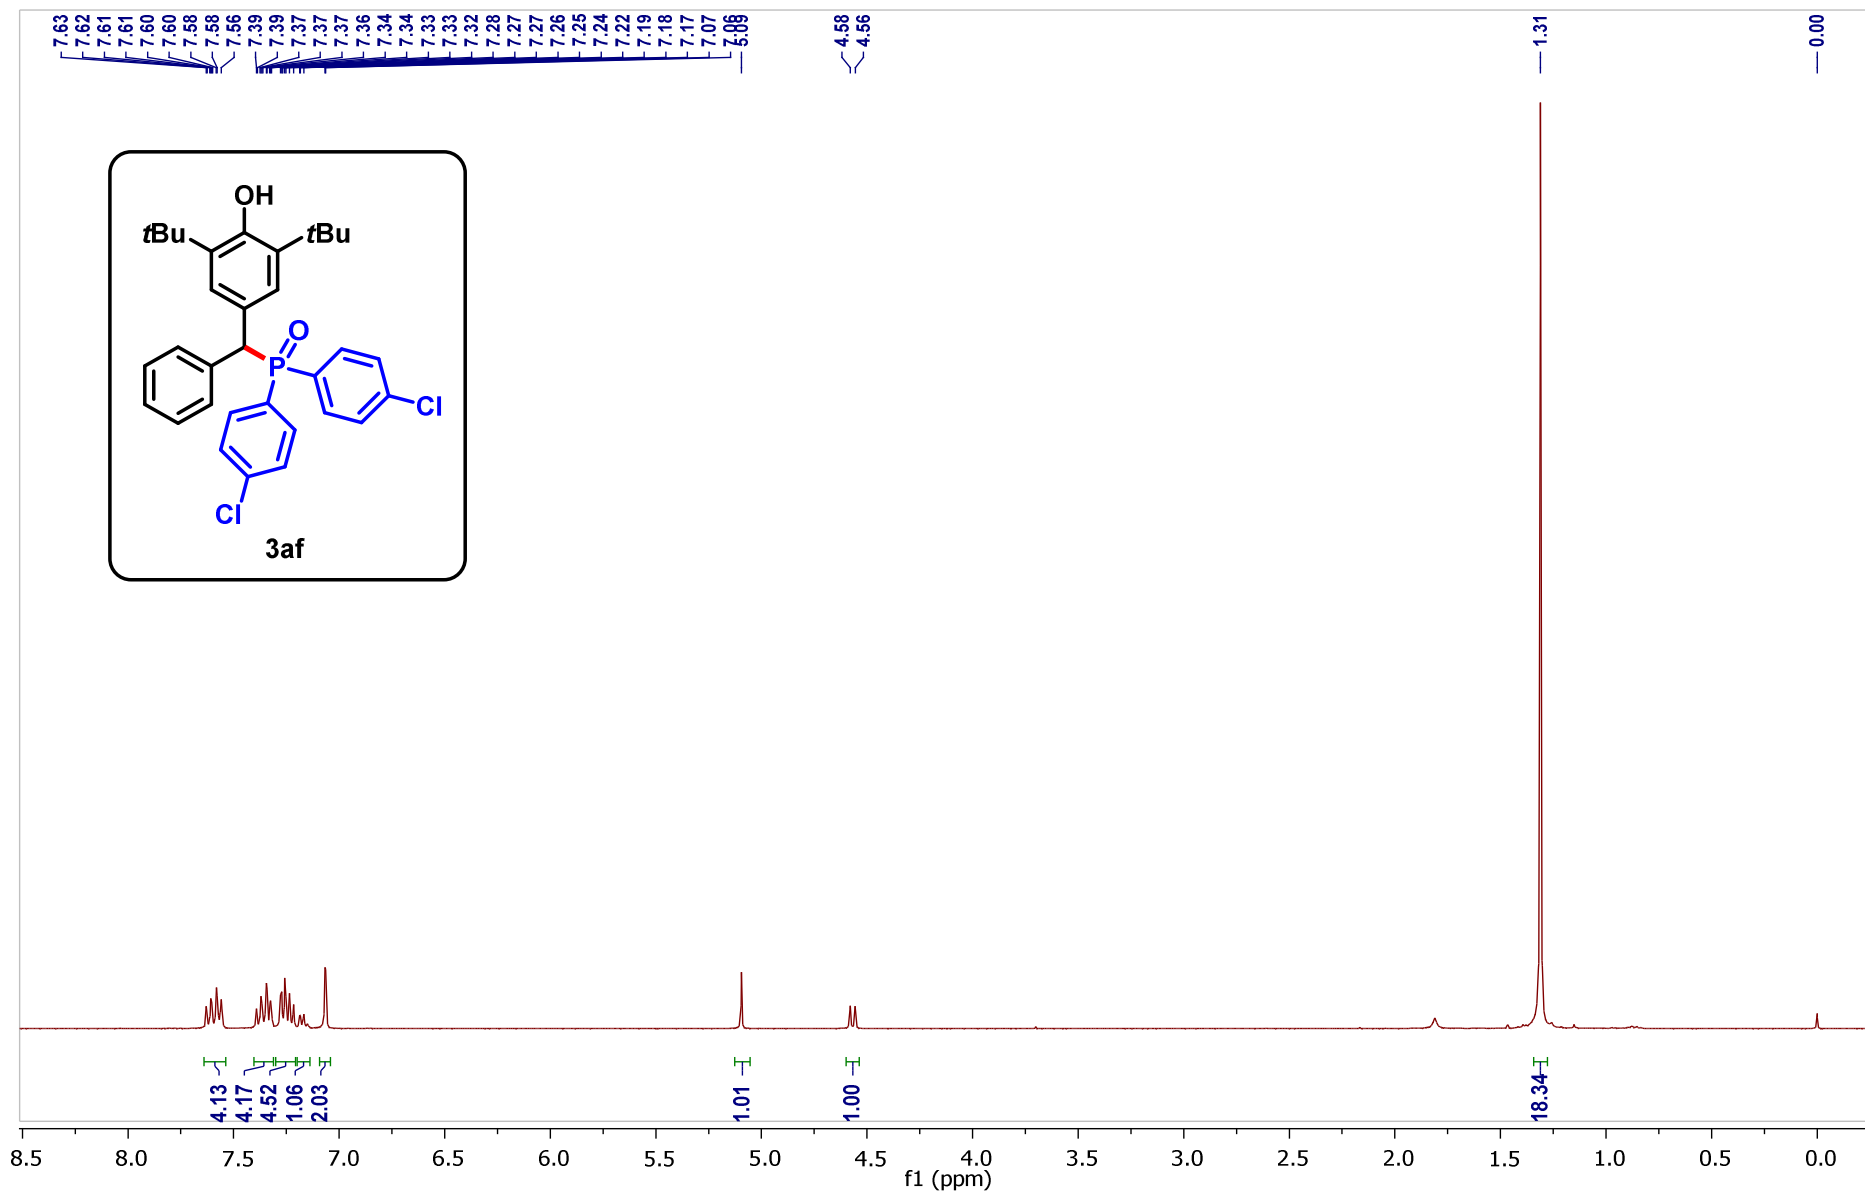

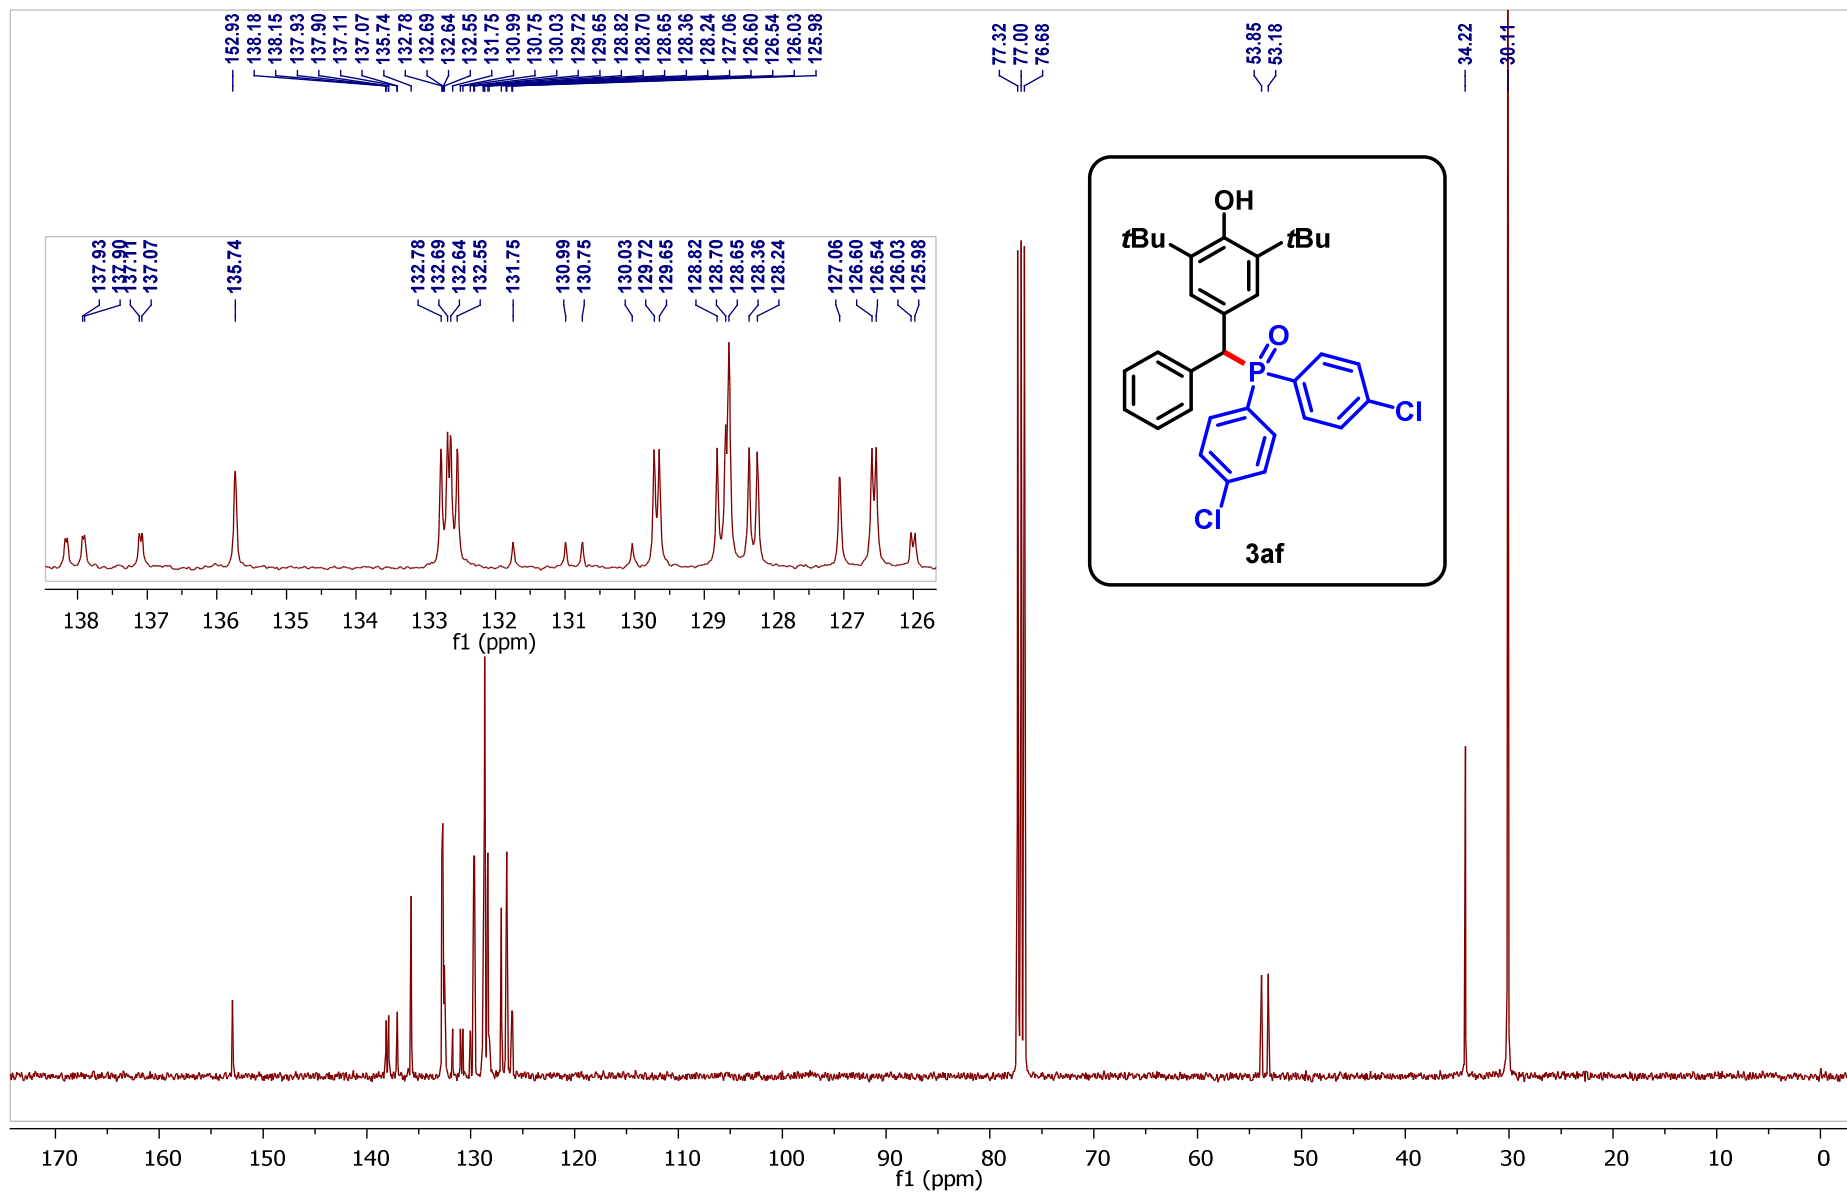



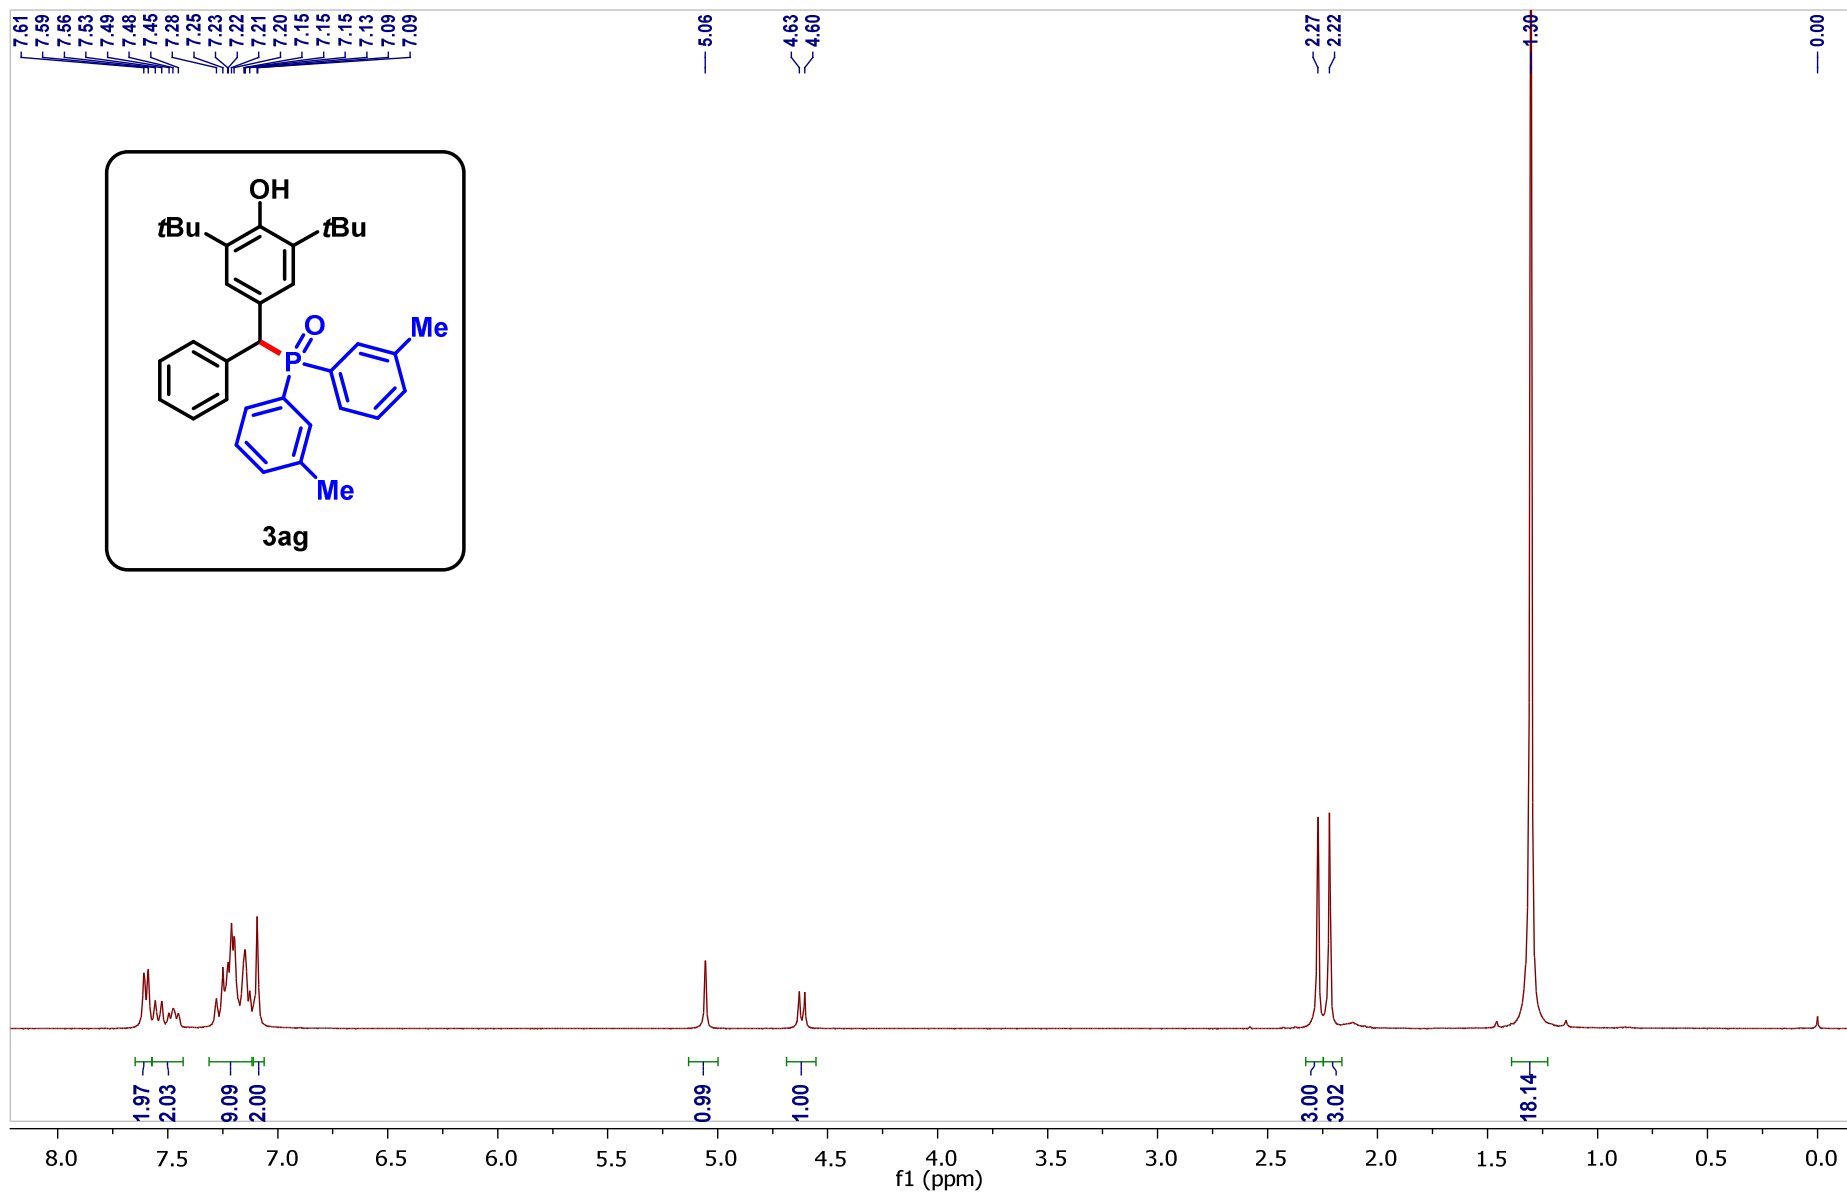

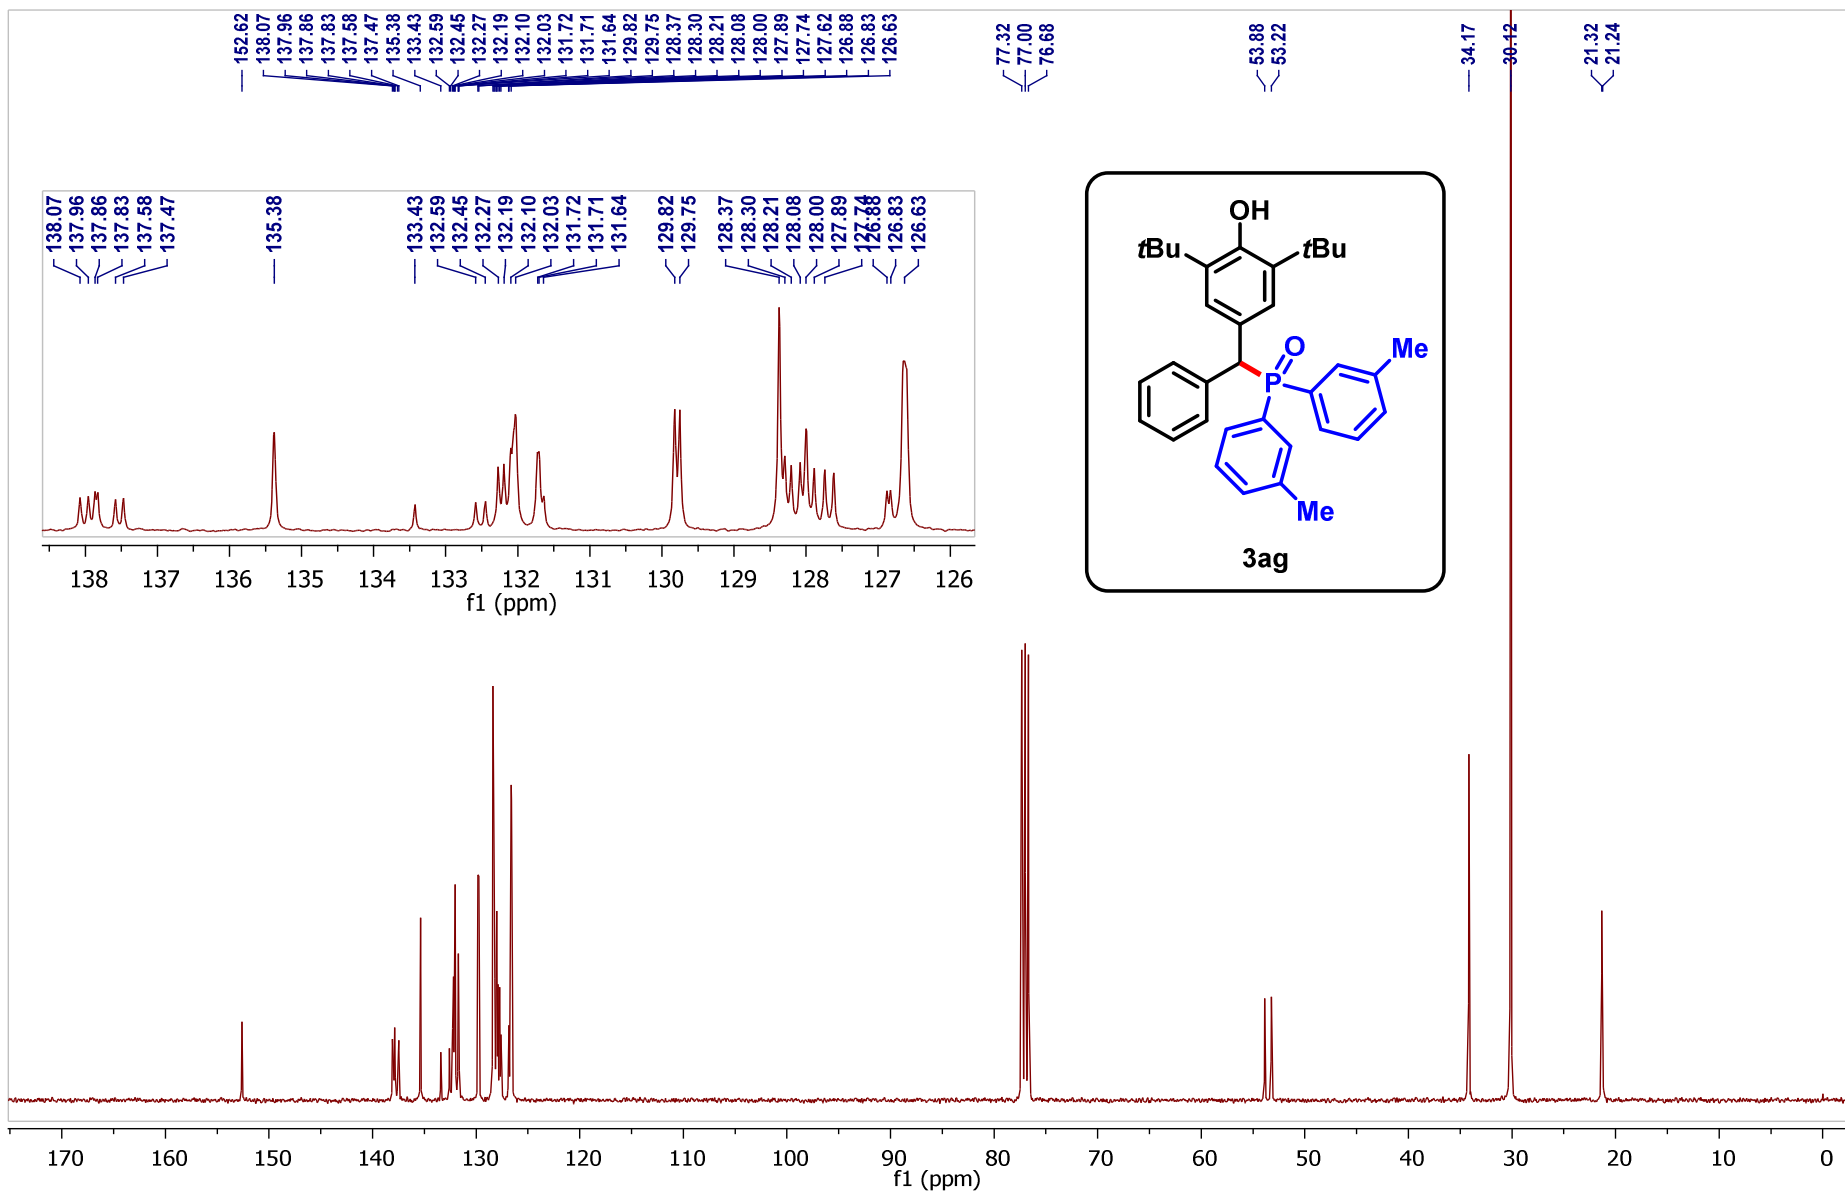

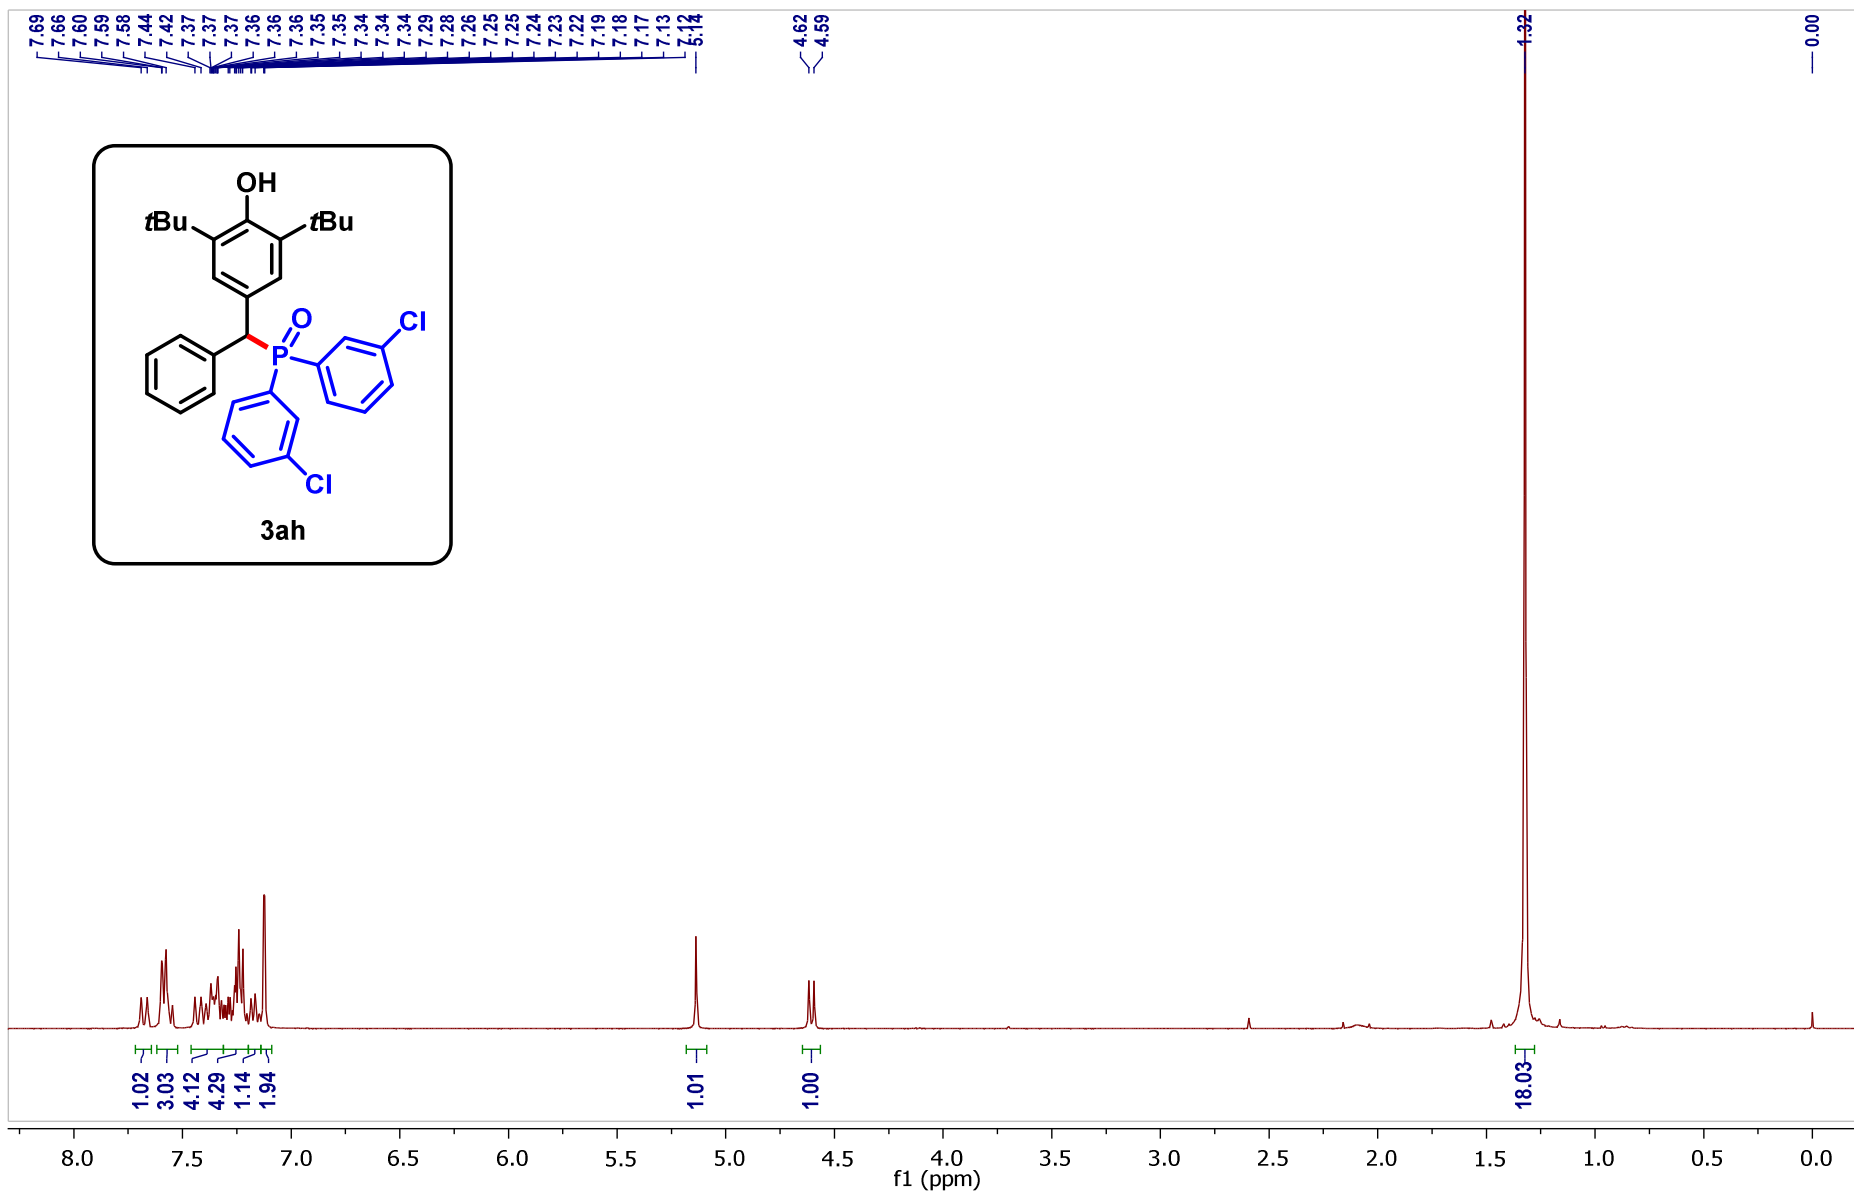

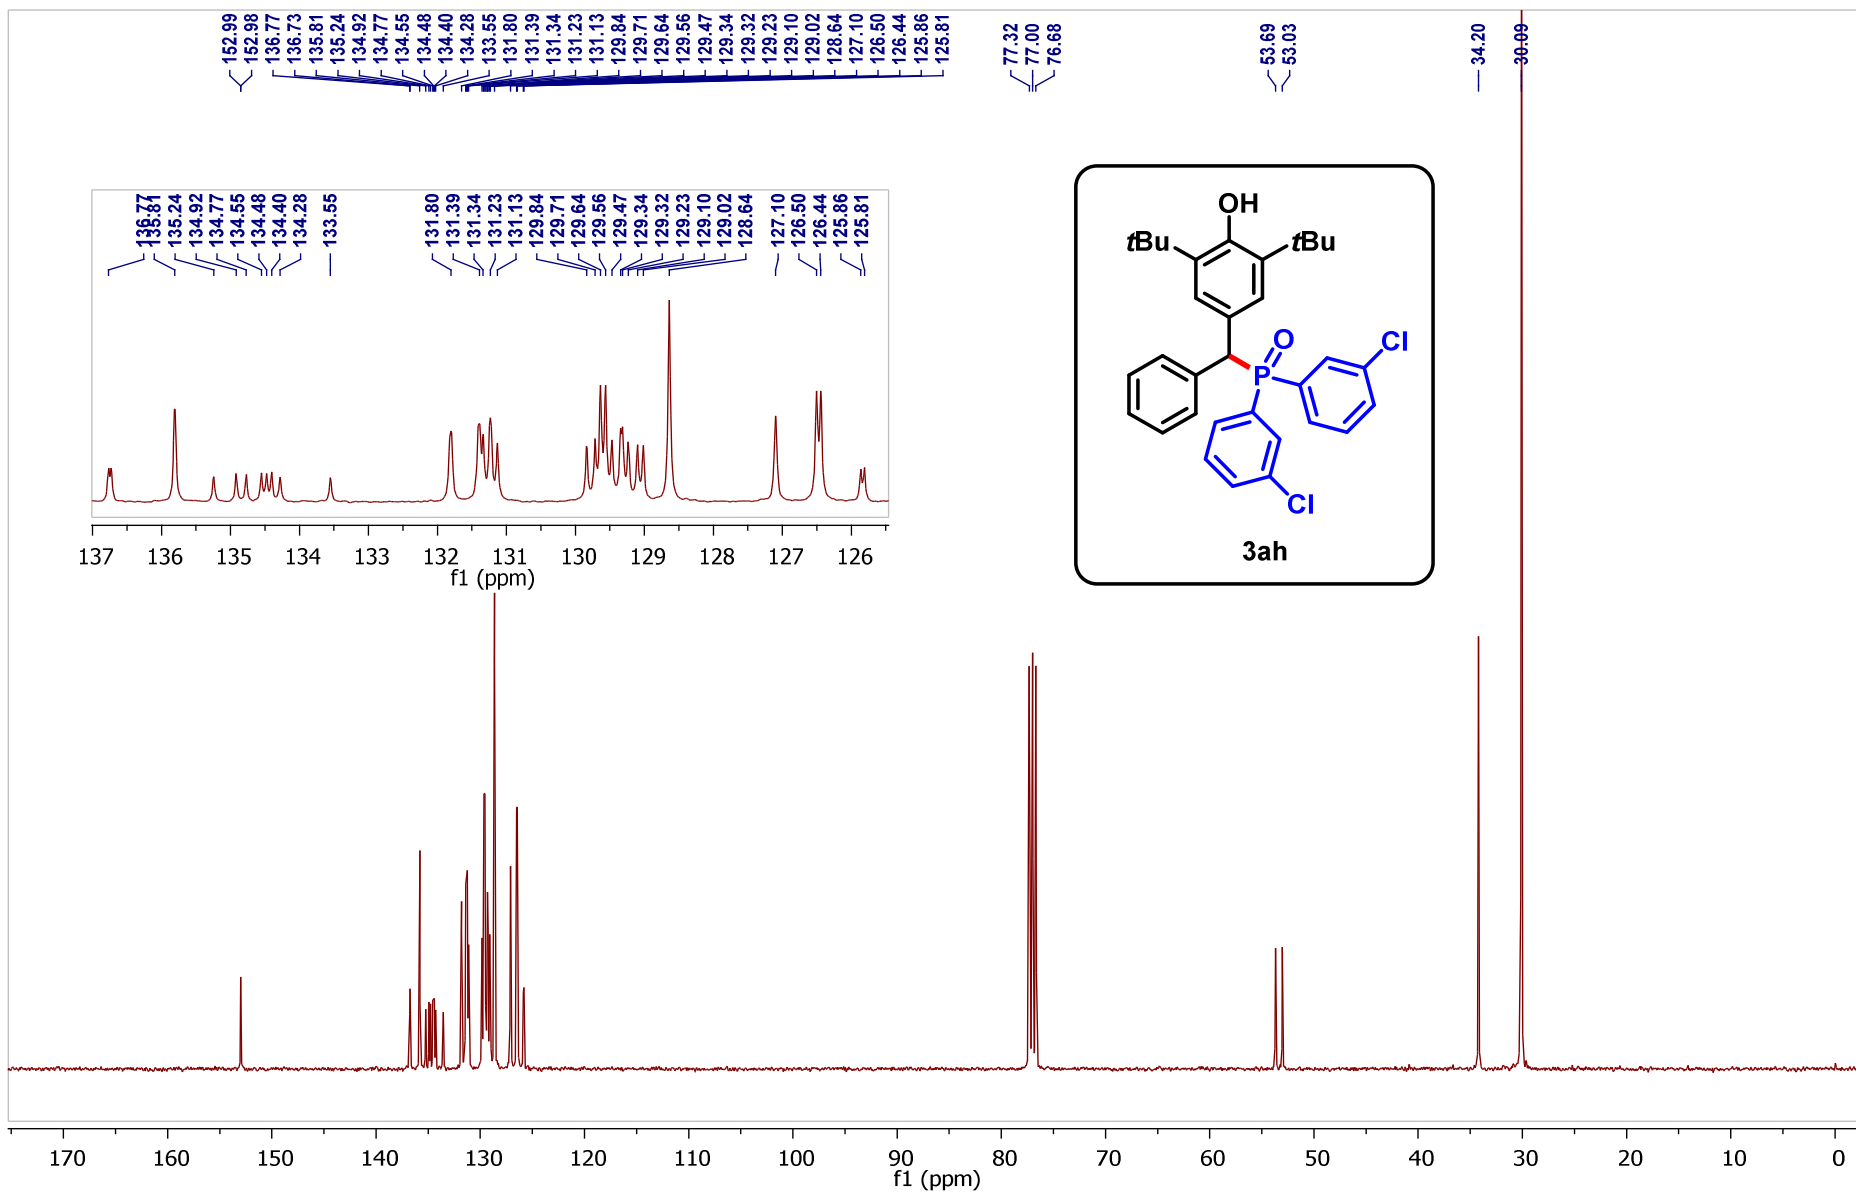

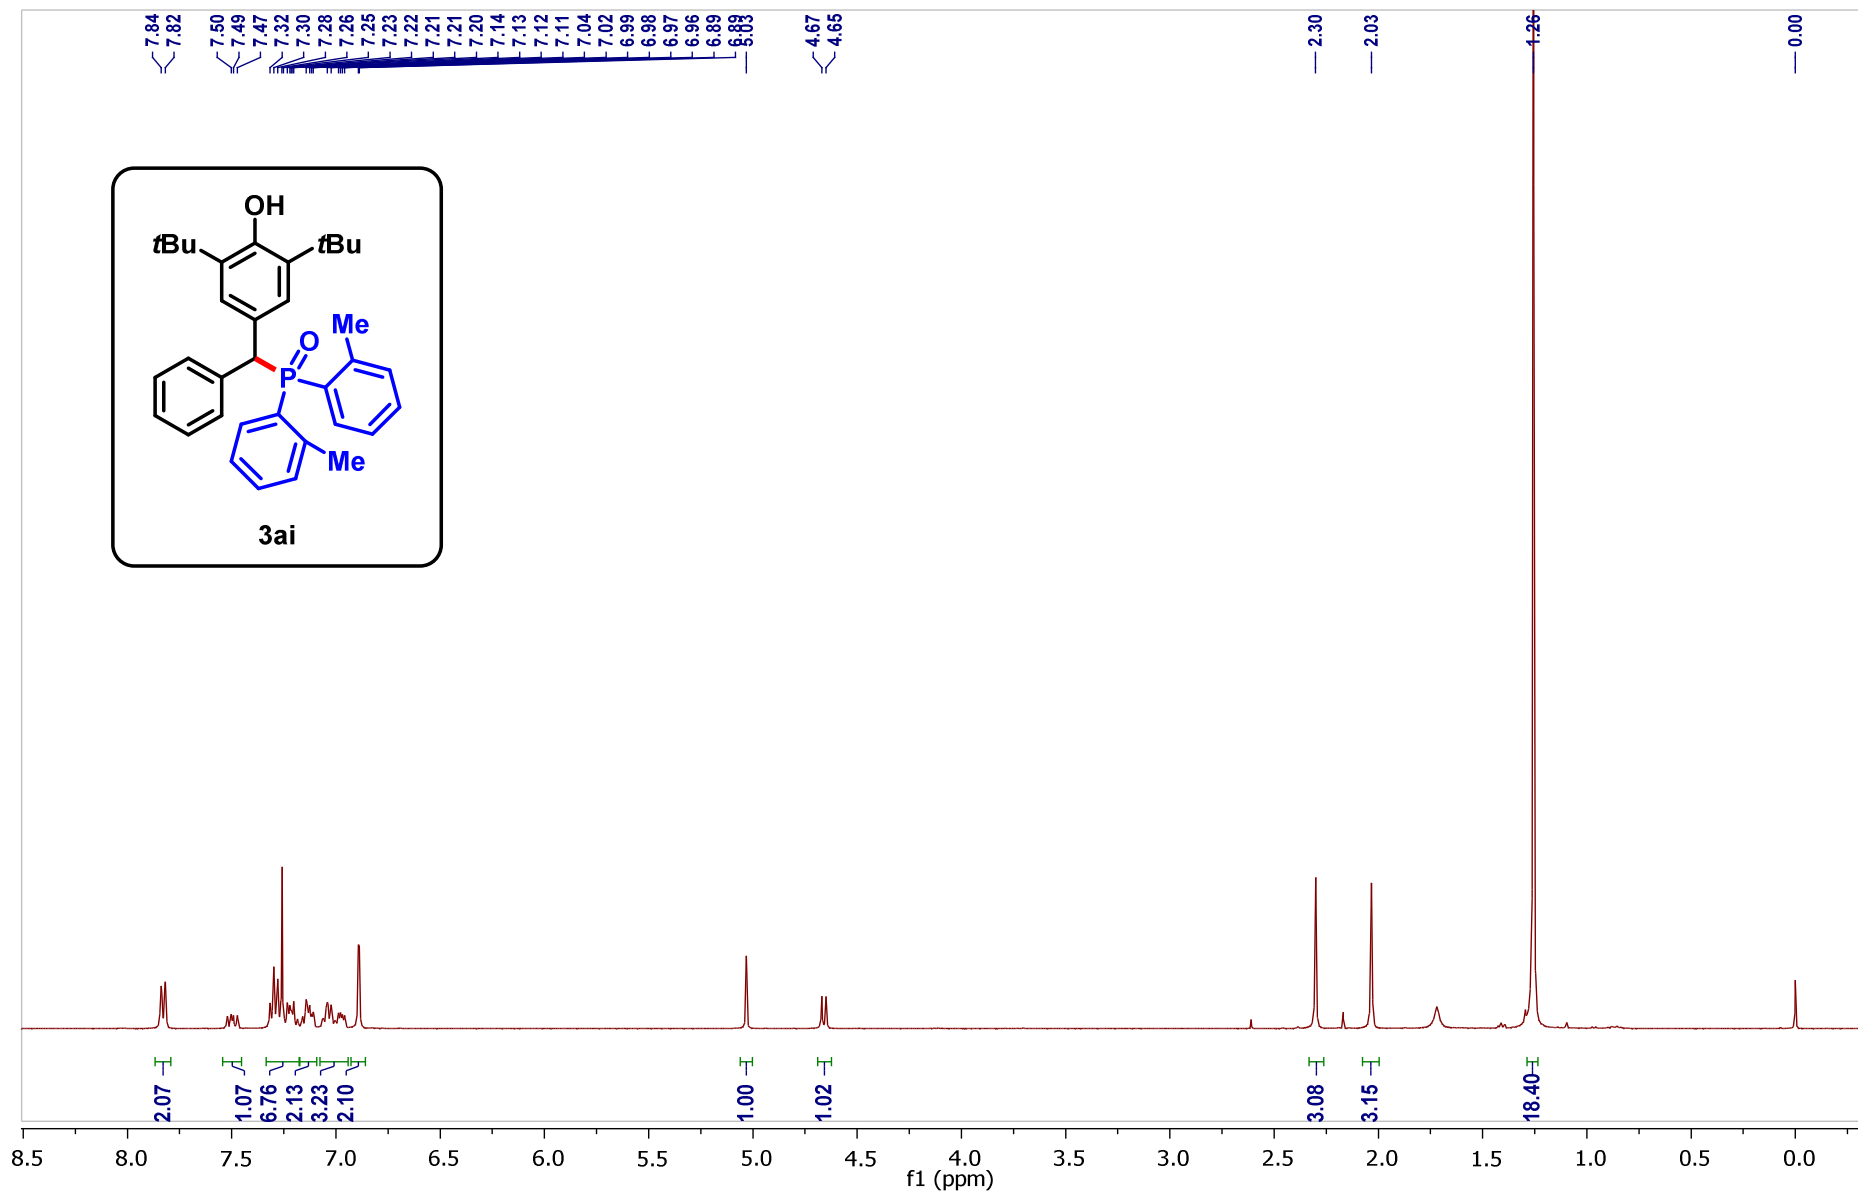

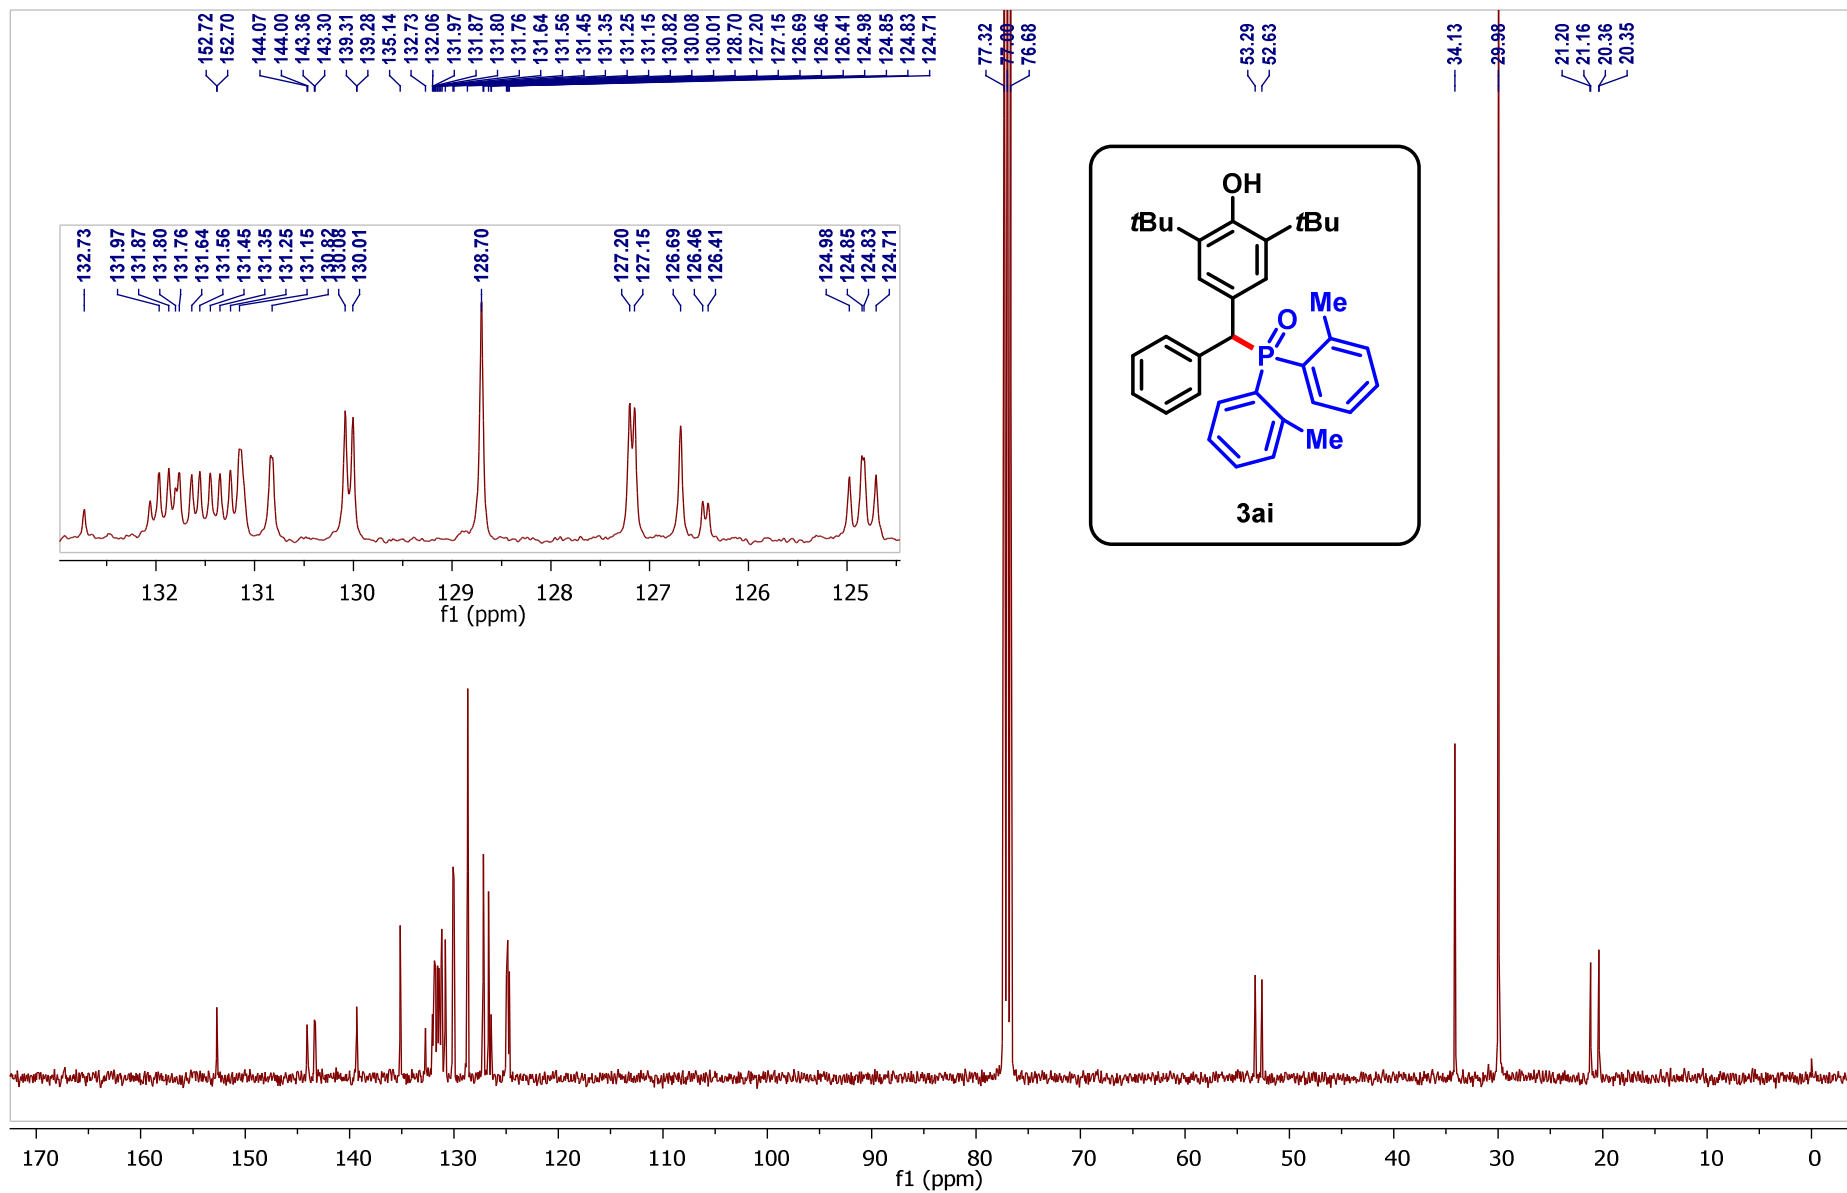

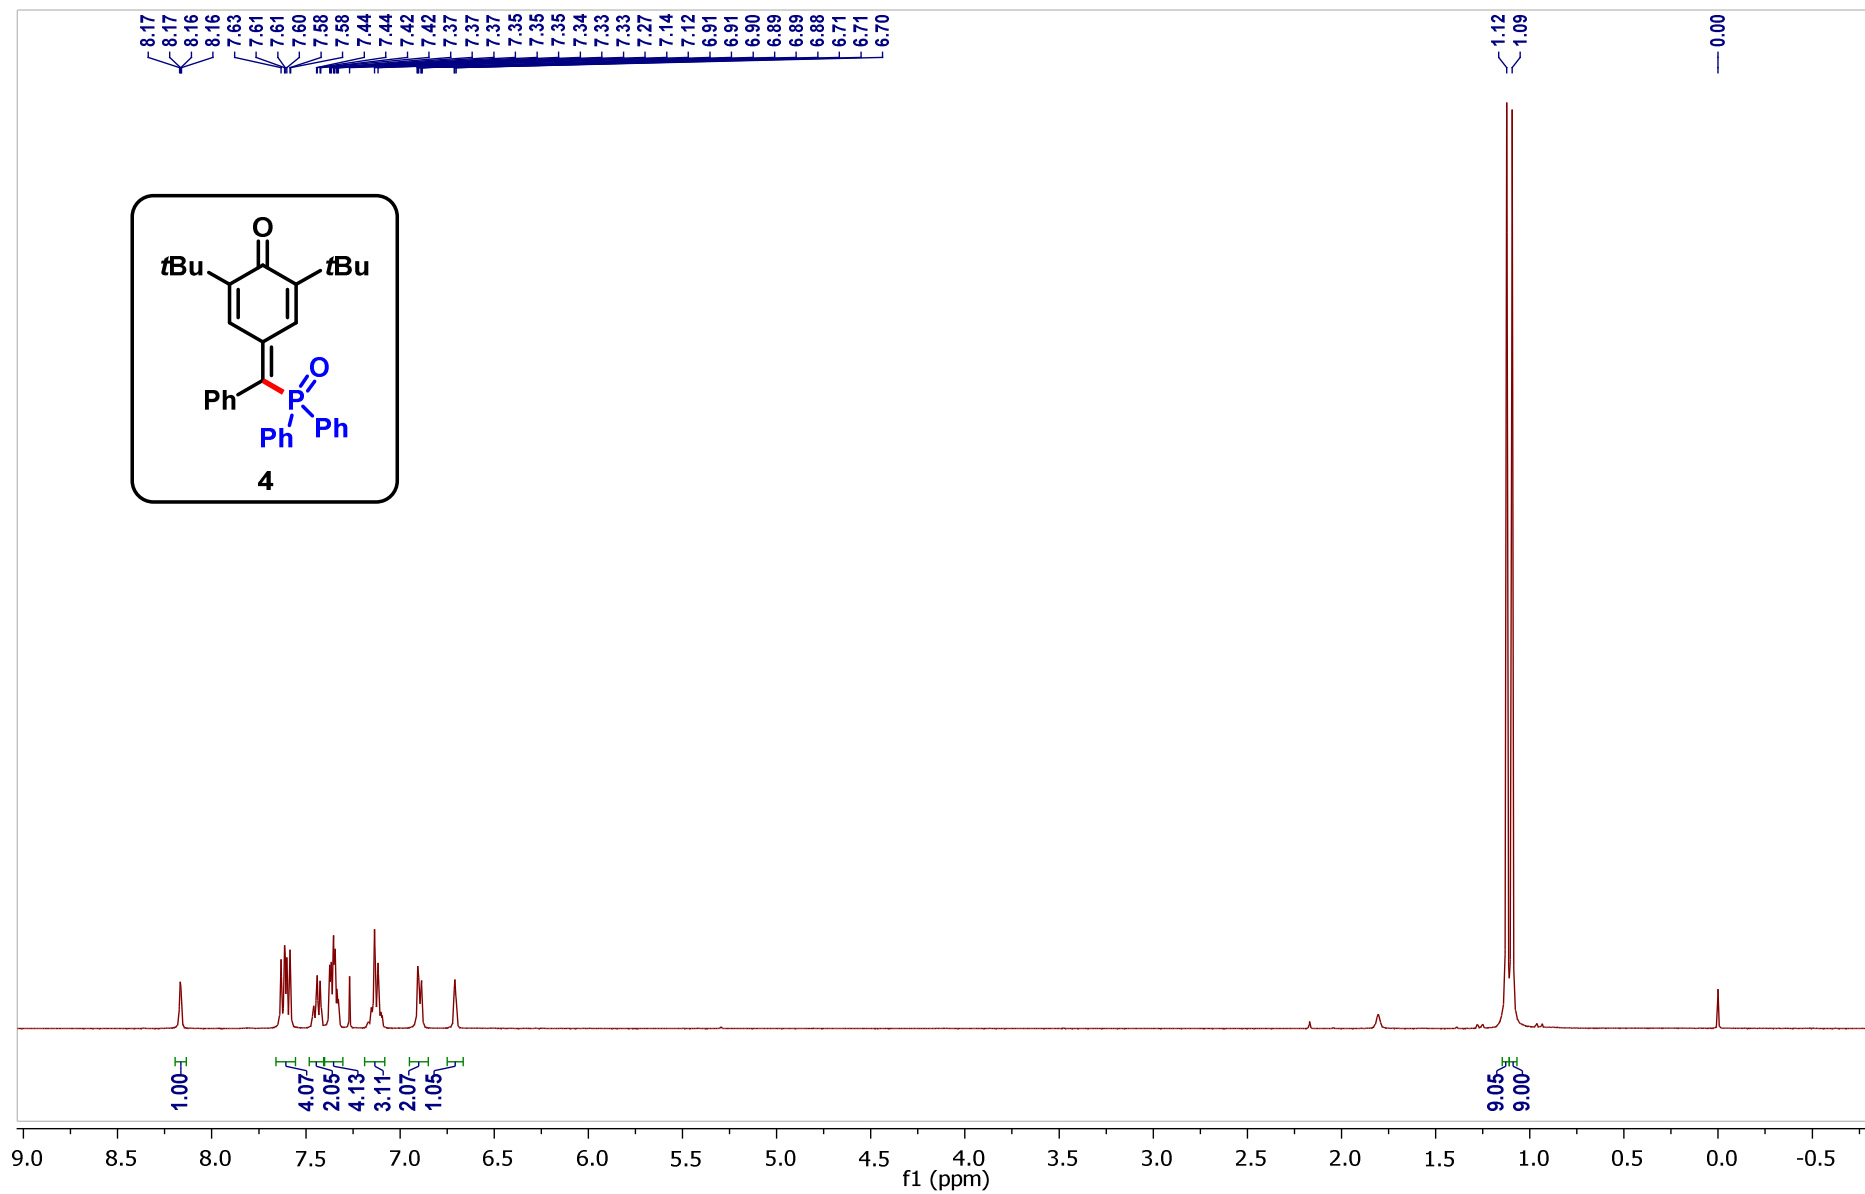

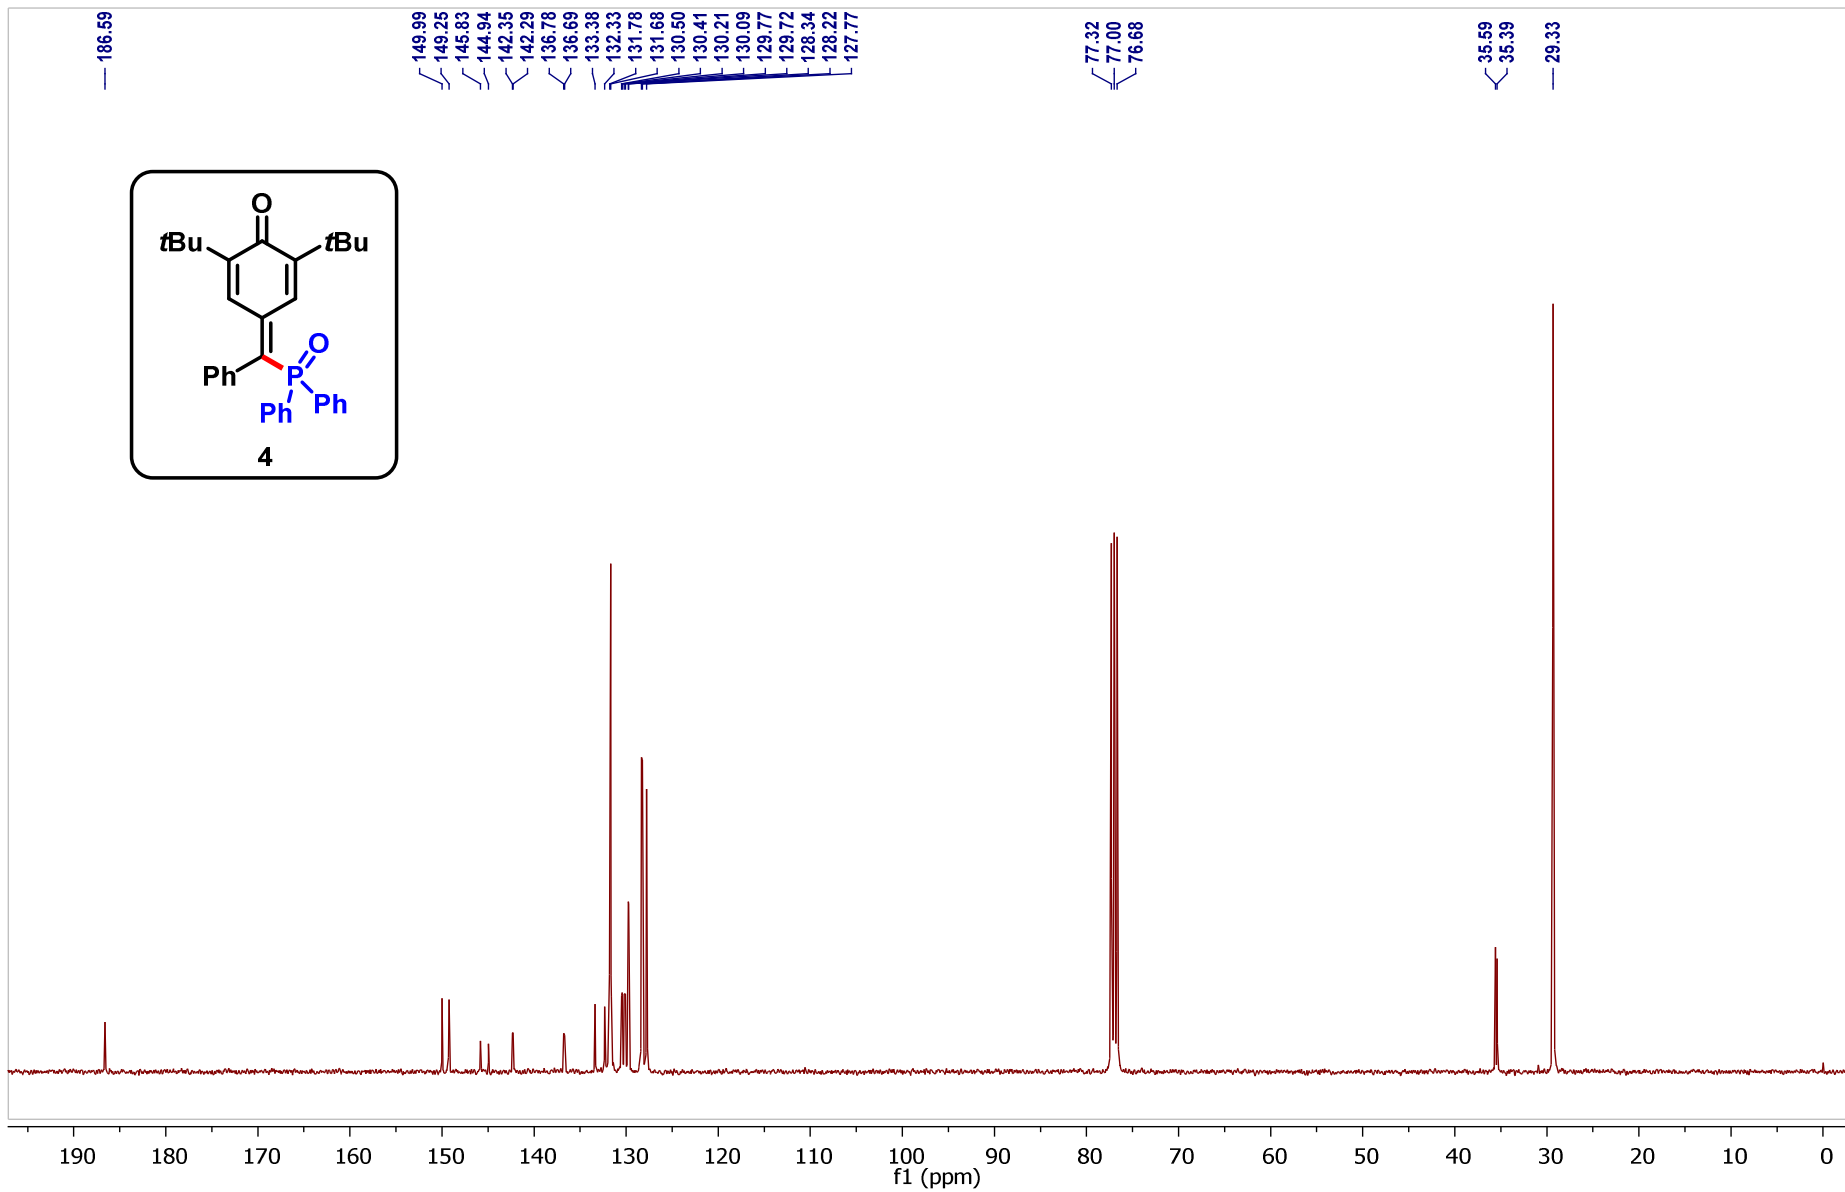



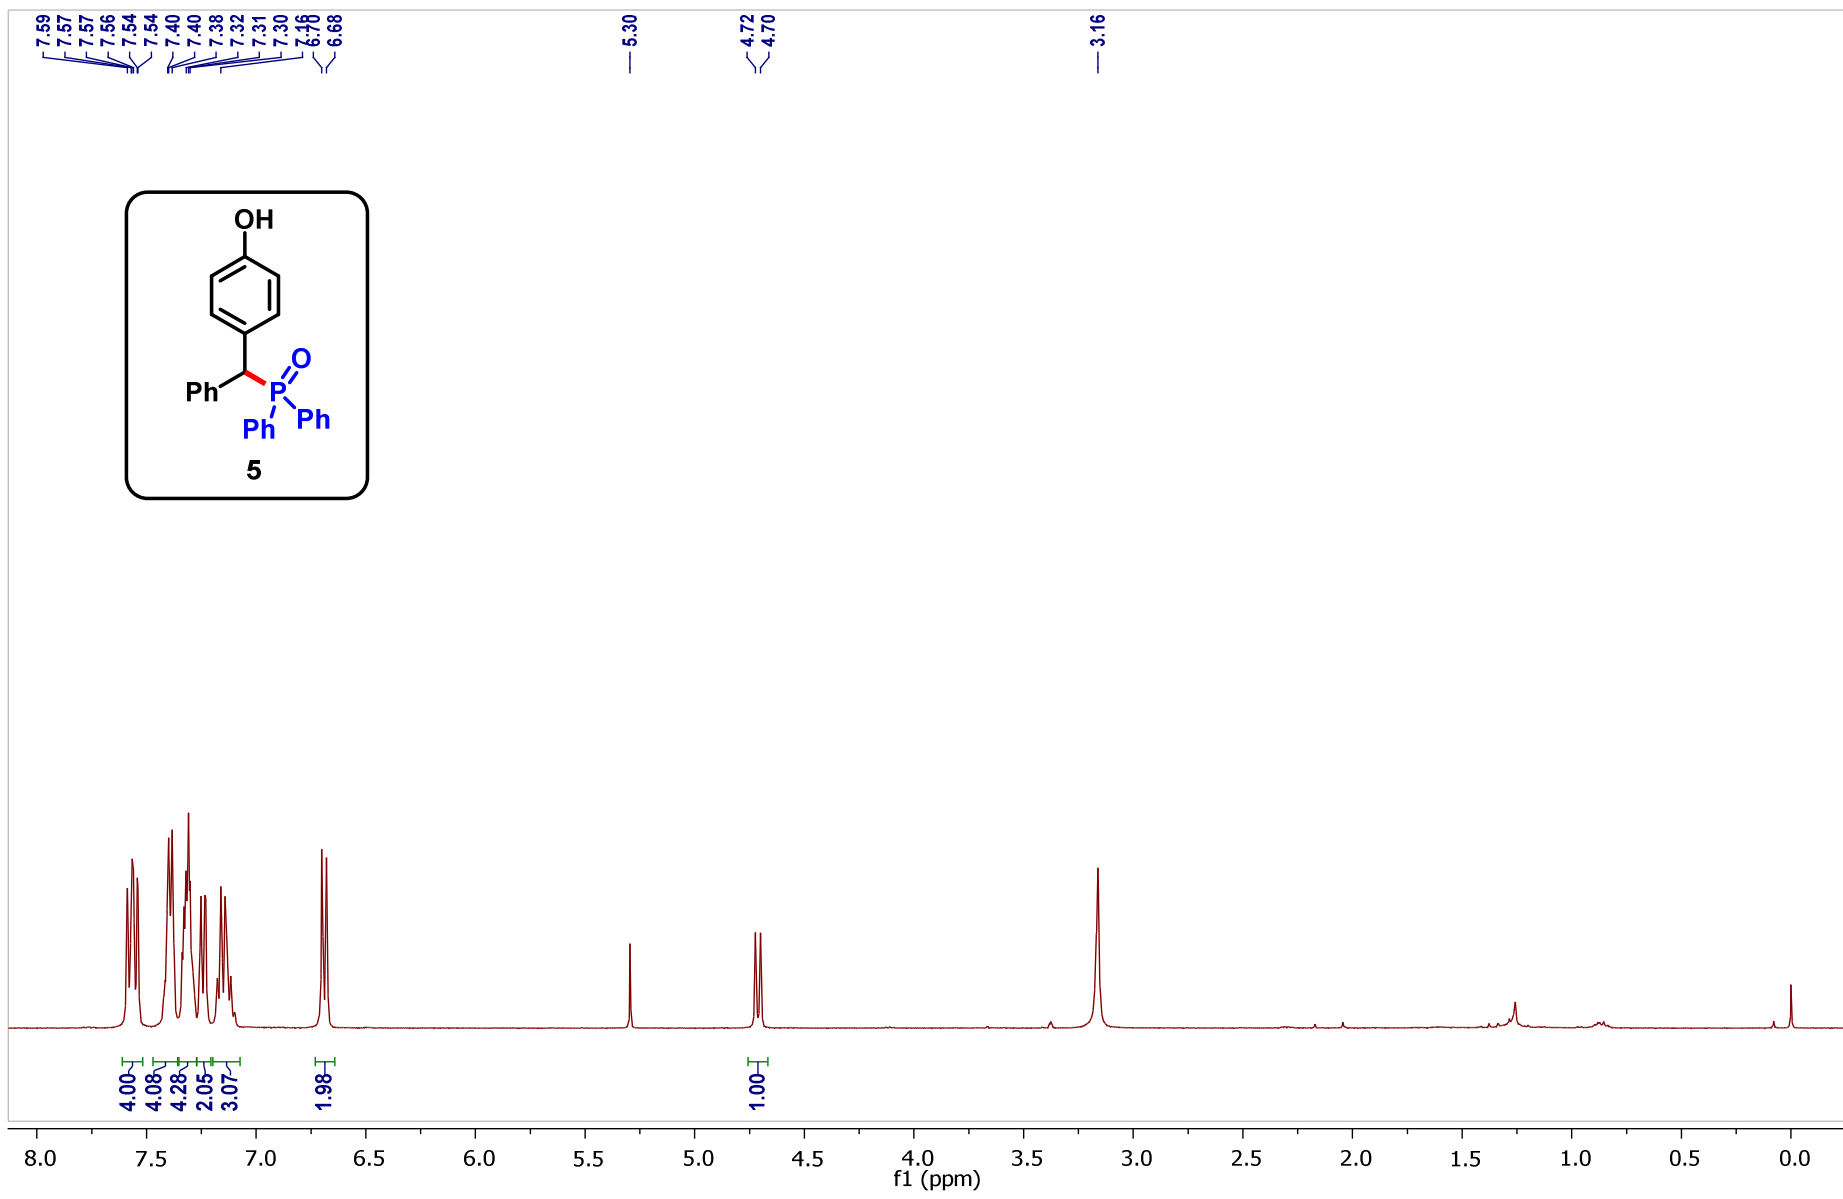

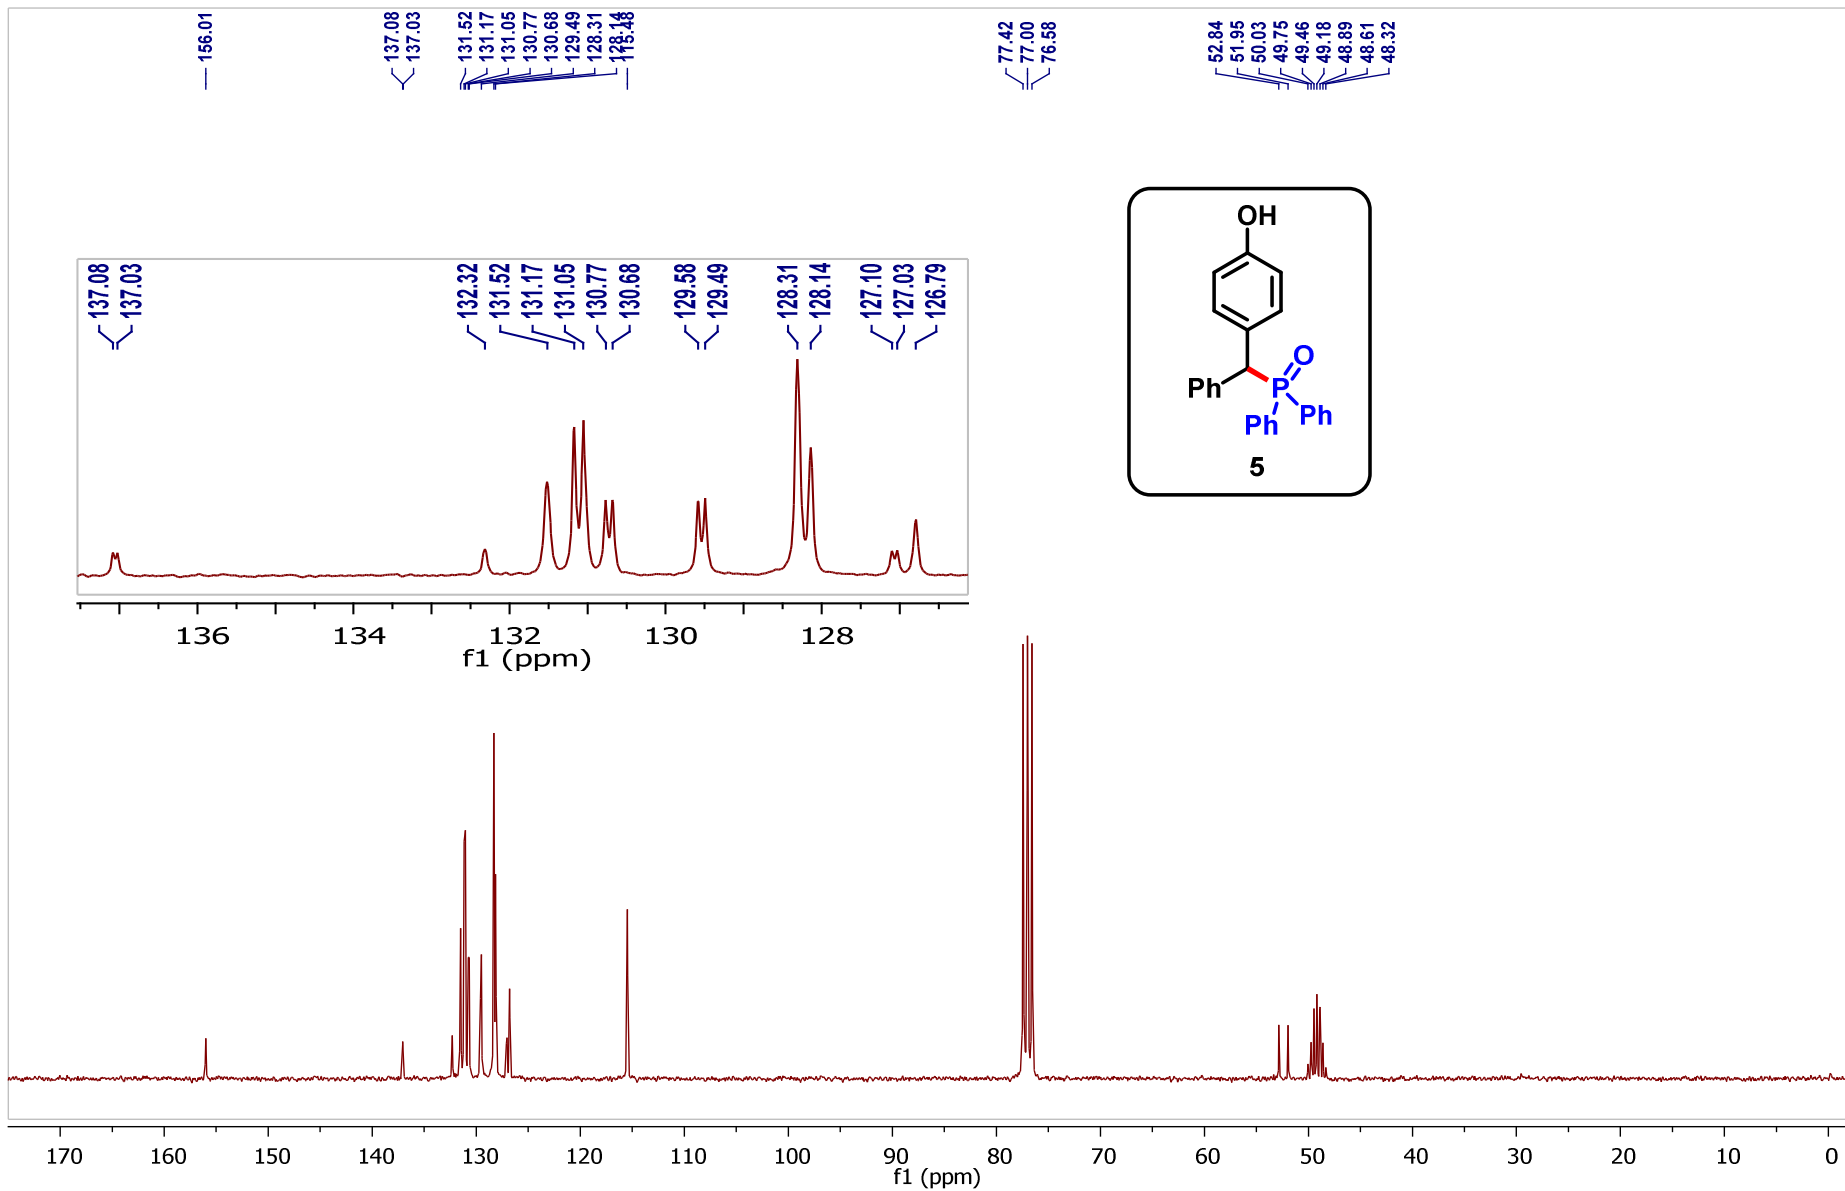

Supplement: c9ob01326a1.pdf [file c9ob01326a1.pdf]
